# Supplementary material
Source: PubMed Central journal article supplement (PMC9295256)
Supplement: NIHMS1823108-supplement-SI.pdf [file NIHMS1823108-supplement-SI.pdf]

## SUPPORTING INFORMATION

### Discovery of First-in-Class Peptidomimetic Neurolysin Activators Possessing Enhanced Brain Penetration and Stability

Md. Shafikur Rahman,<sup>1</sup> Shikha Kumari,<sup>1,^</sup> Shiva Hadi Esfahani,<sup>2,^</sup> Saeideh Nozohouri,<sup>2</sup> Srinidhi Jayaraman,<sup>2</sup> Nihar Kinarivala,<sup>2</sup> Joanna Kocot,<sup>2</sup> Andrew Baez,<sup>2</sup> Delaney Farris,<sup>2</sup> Thomas J. Abbruscato,<sup>2,3</sup> Vardan T. Karamyan<sup>2,3,\*</sup> and Paul C. Trippier<sup>1,4,5,\*</sup>

<sup>1</sup>Department of Pharmaceutical Sciences, College of Pharmacy, University of Nebraska Medical Center, Omaha, NE 68198, USA.

<sup>2</sup>Department of Pharmaceutical Sciences, School of Pharmacy, Texas Tech University Health Sciences Center, Amarillo, TX 79106, USA.

<sup>3</sup>Center for Blood Brain Barrier Research, School of Pharmacy, Texas Tech University Health Sciences Center, Amarillo, TX 79106, USA.

<sup>4</sup>Fred & Pamela Buffett Cancer Center, University of Nebraska Medical Center, Omaha, NE 68198, USA.

<sup>5</sup>UNMC Center for Drug Discovery, University of Nebraska Medical Center, Omaha, NE 68198, USA.

<sup>^</sup>Contributed equally.

\*Email: [vardan.karamyan@ttuhsc.edu](mailto:vardan.karamyan@ttuhsc.edu)

\*Email: [paul.trippier@unmc.edu](mailto:paul.trippier@unmc.edu)

## Table of Contents

|                                                                                         |      |
|-----------------------------------------------------------------------------------------|------|
| Figure S1. Interference of selected compounds towards assay fluorescence substrate..... | S3   |
| Intermediate characterization data.....                                                 | S4   |
| NMR Spectra of final compounds.....                                                     | S26  |
| HPLC chromatograms of final compounds.....                                              | S127 |

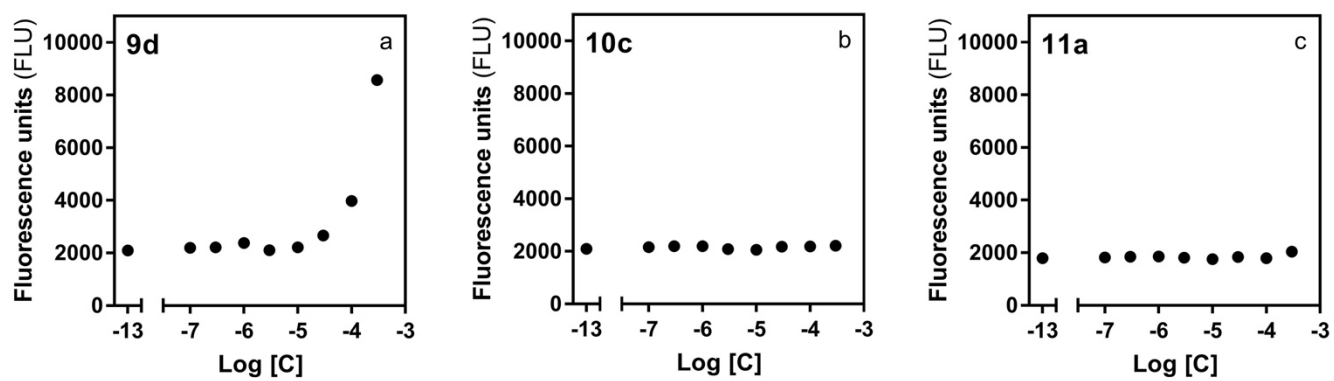

**Figure S1.** Interference of compounds, a) **9d**, b) **10c**, c) **11a** on the fluorescence intensity of the NIn hydrolytic product QFS used in the assay, a) . Compounds **10c** and **11a** provide no interference while compound **9d** interference was adjusted for in assay data analysis.

## Characterization Data of Key Intermediates and Starting Material

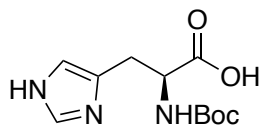

***N*-Boc-*L*-Histidine:**  $[\alpha]_D^{24} +24.46$  (c 0.45, MeOH).

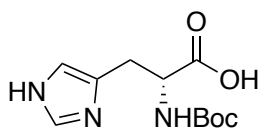

***N*-Boc-*D*-Histidine:**  $[\alpha]_D^{24} -24.57$  (c 0.45, MeOH).

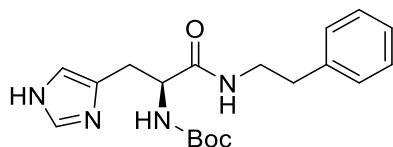

***tert*-butyl (*S*)-(3-(1*H*-imidazol-4-yl)-1-oxo-1-(phenethylamino)propan-2-yl)carbamate:** Following general synthetic procedure A the title compound was synthesized as a white solid (84%).  $R_f = 0.41$  (MeOH : DCM = 1 : 9).  $^1\text{H NMR}$  (400 MHz, MeOH- $d_4$ )  $\delta_H$ : 1.41 (s, 9H), 2.73-2.86 (m, 4H), 3.44-3.46 (m, 2H), 4.20-4.28 (m, 1H), 6.84 (s, 1H), 7.19-7.29 (m, 5H), 7.61 (s, 1H);  $^{13}\text{C NMR}$  (100 MHz, MeOH- $d_4$ )  $\delta_C$ : 27.2, 29.4, 35.1, 40.5, 54.8, 79.2, 117.0, 125.9, 128.1, 128.4, 133.2, 134.7, 139.0, 156.1, 172.8.

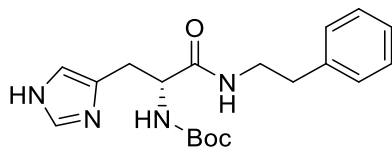

***tert*-butyl (*R*)-(3-(1*H*-imidazol-4-yl)-1-oxo-1-(phenethylamino)propan-2-yl)carbamate:** Following general synthetic procedure A the title compound was synthesized as a white solid (69%).  $R_f = 0.42$  (MeOH : DCM = 1 : 9).  $^1\text{H NMR}$  (400 MHz, MeOH- $d_4$ )  $\delta_H$ : 1.41 (s, 9H), 2.74-2.77 (m, 2H), 2.80-2.85 (m, 1H), 2.97-3.02 (m, 1H), 3.38-3.46 (m, 2H), 4.25 (t,  $J = 6.6$  Hz, 1H), 6.84 (s, 1H), 7.18-7.30 (m, 5H), 7.61 (s, 1H);  $^{13}\text{C NMR}$  (100 MHz, MeOH- $d_4$ )  $\delta_C$ : 27.25, 29.50, 35.09, 40.58, 54.87, 79.24, 116.72, 125.95, 128.12, 128.41, 134.96, 139.01, 172.86.



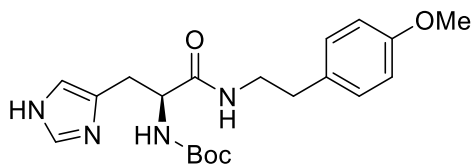

**tert-butyl (S)-3-(1H-imidazol-4-yl)-1-((4-methoxyphenethyl)amino)-1-oxopropan-2-yl carbamate:** Following general synthetic procedure A the title compound was synthesized as a white solid (56 %).  $R_f = 0.35$  (MeOH : DCM = 1 : 9).  $^1\text{H NMR}$  (400 MHz, MeOH- $d_4$ )  $\delta_H$ : 1.41 (s, 9H), 2.69 (t,  $J = 7.2$  Hz, 2H), 2.80-2.86 (m, 1H), 2.98-3.03 (m, 1H), 3.34-3.40 (m, 2H), 3.76 (s, 3H), 4.25 (t,  $J = 6.8$  Hz, 1H), 6.84 (d,  $J = 8.4$  Hz, 3H), 7.11 (d,  $J = 8.4$  Hz, 2H), 7.63 (s, 1H);  $^{13}\text{C NMR}$  (100 MHz, MeOH- $d_4$ )  $\delta_C$ : 27.25, 29.41, 34.19, 40.77, 54.24, 54.84, 79.27, 113.55, 116.99, 129.35, 130.93, 133.20, 134.73, 156.15, 158.36, 172.74.

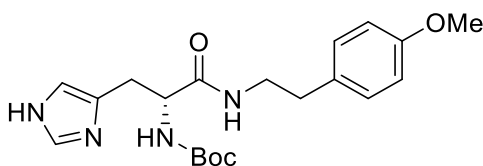

**tert-butyl (R)-3-(1H-imidazol-4-yl)-1-((4-methoxyphenethyl)amino)-1-oxopropan-2-yl carbamate:** Following general synthetic procedure A the title compound was synthesized as a white solid (68%).  $R_f = 0.43$  (MeOH : DCM = 1 : 9).  $^1\text{H NMR}$  (400 MHz, MeOH- $d_4$ )  $\delta_H$ : 1.41 (s, 9H), 2.69 (t,  $J = 7.22$  Hz, 2H), 2.83 (dd,  $J = 14.39, 8.93$  Hz, 1H), 3.00 (dd,  $J = 14.81, 5.34$  Hz, 1H), 3.35-3.44 (m, 2H), 3.77 (s, 3H), 4.25 (t,  $J = 6.59$  Hz, 1H), 6.85 (d,  $J = 8.42$  Hz, 3H), 7.11 (d,  $J = 8.37$  Hz, 2H), 7.62 (s, 1H).  $^{13}\text{C NMR}$  (100 MHz, MeOH- $d_4$ )  $\delta_C$ : 27.28, 29.45, 34.21, 40.78, 54.26, 54.86, 79.27, 113.56, 117.02, 129.36, 130.93, 133.20, 133.21, 134.76, 156.15, 158.35, 172.75.

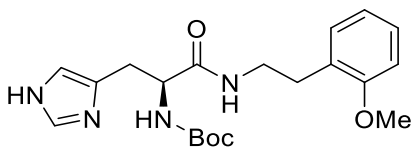

**tert-butyl (S)-3-(1H-imidazol-4-yl)-1-((2-methoxyphenethyl)amino)-1-oxopropan-2-yl carbamate:** Following general synthetic procedure A the title compound was synthesized as a white solid (70%).  $R_f = 0.38$  (MeOH : DCM = 1 : 9).  $^1\text{H NMR}$  (400 MHz, MeOH- $d_4$ )  $\delta_H$ : 1.41 (s, 9H), 2.80 (dt,

$J = 23.29, 7.24$  Hz, 3H), 3.00 (dd,  $J = 14.72, 5.21$  Hz, 1H), 3.35 - 3.46 (m, 2H), 3.84 (s, 3H), 4.25 (t,  $J = 6.73$  Hz, 1H), 6.83 - 6.88 (m, 2H), 6.93 (d,  $J = 8.11$  Hz, 1H), 7.10 (d,  $J = 7.16$  Hz, 1H), 7.20 (td,  $J = 7.82, 1.39$  Hz, 1H), 7.60 (s, 1H).  $^{13}\text{C}$  NMR (100 MHz, MeOH- $d_4$ )  $\delta_{\text{C}}$ : 25.73, 27.96, 28.16, 37.79, 52.87, 53.33, 77.72, 108.56, 115.45, 118.63, 125.46, 125.96, 128.56, 133.19, 156.05, 171.16.

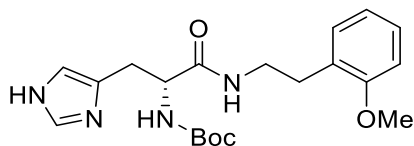

**tert-butyl** **(R)-3-(1H-imidazol-4-yl)-1-((2-methoxyphenethyl)amino)-1-oxopropan-2-yl)carbamate:** Following general synthetic procedure A the title compound was synthesized as a white solid (72%).  $R_f = 0.38$  (MeOH : DCM = 1 : 9).  $^1\text{H}$  NMR (400 MHz, MeOH- $d_4$ )  $\delta_{\text{H}}$ : 1.41 (s, 9H), 2.76-2.85

(m, 3H), 3.00 (dd,  $J = 14.70, 5.15$  Hz, 1H), 3.35 - 3.44 (m, 2H), 3.85 (s, 3H), 4.25 (t,  $J = 6.59$  Hz, 1H), 6.86 (dd,  $J = 13.33, 5.19$  Hz, 2H), 6.93 (d,  $J = 8.14$  Hz, 1H), 7.10 (d,  $J = 7.19$  Hz, 1H), 7.20 (td,  $J = 7.82, 1.46$  Hz, 1H), 7.62 (s, 1H).  $^{13}\text{C}$  NMR (100 MHz, MeOH- $d_4$ )  $\delta_{\text{C}}$ : 27.27, 29.47, 29.70, 39.35, 54.42, 54.86, 79.28, 110.12, 117.03, 120.20, 127.01, 127.53, 130.12, 133.18, 134.75, 156.15, 157.61, 172.72.

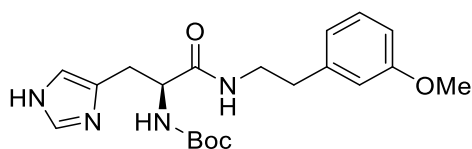

**tert-butyl** **(S)-3-(1H-imidazol-4-yl)-1-((3-methoxyphenethyl)amino)-1-oxopropan-2-yl)carbamate:** Following general synthetic procedure A the title compound was synthesized as a white solid (71%).  $R_f = 0.38$  (MeOH : DCM = 1 : 9).  $^1\text{H}$  NMR (400 MHz, MeOH- $d_4$ )  $\delta_{\text{H}}$ : 1.41 (s, 9H), 2.73 (t,  $J = 7.25, 2\text{H}$ ), 2.83 (dd,  $J = 14.64, 8.67$  Hz, 1H), 3.00 (dd,  $J = 14.74, 5.27$  Hz, 1H), 3.36 - 3.47 (m, 2H),

3.78 (s, 3H), 4.26 (t,  $J = 6.77$  Hz, 1H), 6.75 - 6.79 (m, 3H), 6.85 (s, 1H), 7.19 (t,  $J = 7.89$  Hz, 1H), 7.63 (s, 1H).  $^{13}\text{C}$  NMR (100 MHz, MeOH- $d_4$ )  $\delta_{\text{C}}$ : 25.71, 27.91, 33.59, 38.95, 52.65, 53.32, 77.72, 109.97, 112.42, 115.45, 119.16, 127.54, 131.80, 133.21, 138.98, 154.60, 158.36, 171.24.

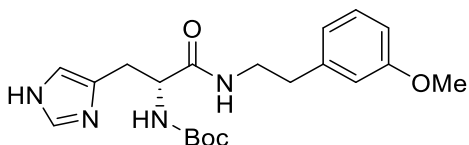

**tert-butyl (R)-3-(1H-imidazol-4-yl)-1-((3-methoxyphenethyl)amino)-1-oxopropan-2-yl carbamate:** Following general synthetic procedure A the title compound was synthesized as a white solid (69%).  $R_f = 0.35$  (MeOH : DCM = 1 : 9).  $^1\text{H NMR}$  (400 MHz, MeOH- $d_4$ )  $\delta_H$ : 1.41 (s, 9H), 2.72 (q,  $J = 6.78$ , 2H), 2.83 (dd,  $J = 14.65$ , 8.68 Hz, 1H), 2.99 (dd,  $J = 14.67$ , 5.39 Hz, 1H), 3.36 - 3.48 (m, 2H), 3.79 (s, 3H), 4.25 (t,  $J = 6.68$  Hz, 1H), 6.76 - 6.79 (m, 3H), 6.84 (s, 1H), 7.19 (t,  $J = 7.91$  Hz, 1H), 7.60 (s, 1H).  $^{13}\text{C NMR}$  (100 MHz, MeOH- $d_4$ )  $\delta_C$ : 27.28, 29.51, 35.15, 40.49, 54.21, 54.89, 79.26, 111.52, 113.97, 117.01, 120.72, 129.10, 133.24, 134.78, 140.52, 156.14, 159.90, 172.80.

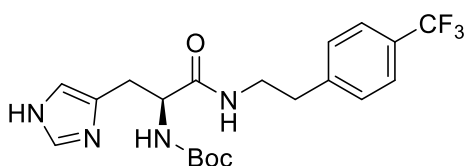

**tert-butyl (S)-3-(1H-imidazol-4-yl)-1-oxo-1-((4-(trifluoromethyl)phenethyl)amino)propan-2-yl carbamate:** Following general synthetic procedure A the title compound was synthesized as a white solid (84%).  $R_f = 0.36$  (MeOH : DCM = 1 : 9).  $^1\text{H NMR}$  (400 MHz, MeOH- $d_4$ )  $\delta_H$ : 1.41 (s, 9H), 2.80-2.87 (m, 3H), 2.97-3.02 (m, 1H), 3.38-3.50 (m, 2H), 4.24 (t,  $J = 6.8$  Hz, 1H), 6.85 (s, 1H), 7.40 (d,  $J = 8$  Hz, 2H), 7.58 (d,  $J = 8$  Hz, 3H);  $^{13}\text{C NMR}$  (100 MHz, MeOH- $d_4$ )  $\delta_C$ : 27.24, 29.45, 34.81, 40.07, 54.90, 79.25, 123.10, 124.90, 124.94, 129.16, 134.79, 143.77, 156.17, 172.98.

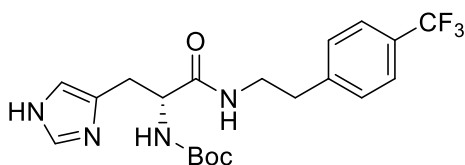

**tert-butyl (S)-3-(1H-imidazol-4-yl)-1-oxo-1-((4-(trifluoromethyl)phenethyl)amino)propan-2-yl carbamate:** Following general synthetic procedure A the title compound was synthesized as a white

solid (70%).  $R_f = 0.49$  (MeOH : DCM = 1 : 9).  $^1\text{H NMR}$  (400 MHz, MeOH- $d_4$ )  $\delta_{\text{H}}$ : 1.41 (s, 9H), 2.80-2.85 (m, 2H), 2.90- 3.05 (m, 2H), 3.40-3.49 (m, 2H), 4.25 (t,  $J = 6.6$  Hz, 1H), 6.86 (s, 1H), 7.40 (d,  $J = 8$ Hz, 2H), 7.58-7.64 (m, 3H);  $^{13}\text{C NMR}$  (100 MHz, MeOH- $d_4$ )  $\delta_{\text{C}}$ : 27.23, 29.36, 34.80, 40.07, 54.84, 79.27, 116.80, 124.90, 124.93, 125.80, 129.16, 134.74, 143.77, 156.25, 172.97.

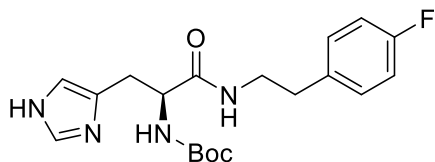

**tert-butyl (S)-(1-((4-fluorophenethyl)amino)-3-(1H-imidazol-4-yl)-1-oxopropan-2-yl)carbamate:**

Following general synthetic procedure A the title compound was synthesized as a white solid (83%).  $R_f = 0.51$  (MeOH : DCM = 1 : 9).  $^1\text{H NMR}$  (400 MHz, MeOH- $d_4$ )  $\delta_{\text{H}}$ : 1.41 (s, 9H), 2.72-2.76 (m, 2H), 2.79-2.85 (m, 1H), 2.97-3.02 (m, 1H), 3.37-3.45 (m, 2H), 4.24 (t,  $J = 6.6$  Hz, 1H), 6.84 (s, 1H), 7.00 (t,  $J = 8.6$  Hz, 2H), 7.20 (t,  $J = 5.6$  Hz, 2H), 7.60 (s, 1H);  $^{13}\text{C NMR}$  (100 MHz, MeOH- $d_4$ )  $\delta_{\text{C}}$ : 27.24, 29.50, 34.21, 40.54, 54.87, 79.24, 114.55, 114.76, 130.05, 130.13, 134.77, 134.94, 160.42, 162.83, 172.87.

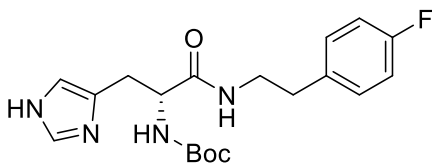

**tert-butyl (R)-(1-((4-fluorophenethyl)amino)-3-(1H-imidazol-4-yl)-1-oxopropan-2-yl)carbamate:**

Following general synthetic procedure A the title compound was synthesized as a white solid (73%).  $R_f = 0.49$  (MeOH : DCM = 1 : 9).  $^1\text{H NMR}$  (400 MHz, MeOH- $d_4$ )  $\delta_{\text{H}}$ : 1.40 (s, 9H), 2.74 (t,  $J = 6.8$  Hz, 2H), 2.82-3.37 (m, 4H), 4.27 (s, 1H), 6.90 (s, 1H), 6.99 (t,  $J = 8.4$  Hz, 2H), 7.20 (t,  $J = 6.4$  Hz, 2H), 7.73 (s, 1H);  $^{13}\text{C NMR}$  (100 MHz, MeOH- $d_4$ )  $\delta_{\text{C}}$ : 27.21, 28.74, 34.18, 40.55, 54.43, 79.39, 114.6, 116.92, 130.1, 132.31, 134.63, 156.14, 161.6, 172.34.

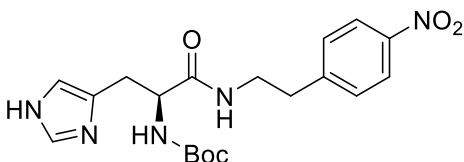

**tert-butyl (S)-(3-(1H-imidazol-4-yl)-1-((4-nitrophenethyl)amino)-1-oxopropan-2-yl)carbamate:**

Following general synthetic procedure A the title compound was synthesized as a white solid (63%).  $R_f$

= 0.28 (MeOH : DCM = 1 : 9). <sup>1</sup>H NMR (400 MHz, MeOH-d<sub>4</sub>) δ<sub>H</sub>: 1.41 (s, 9H), 2.82 (dd, *J* = 14.74, 8.60 Hz, 1H), 2.91 (t, *J* = 6.98 Hz, 2H), 2.99 (dd, *J* = 14.76, 5.55 Hz, 1H), 3.47 (t, *J* = 6.92 Hz, 2H), 4.24 (t, *J* = 6.95 Hz, 1H), 6.86 (s, 1H), 7.45 (d, *J* = 8.48 Hz, 2H), 7.63 (s, 1H), 8.17 (d, *J* = 8.60 Hz, 2H). <sup>13</sup>C NMR (100 MHz, MeOH-d<sub>4</sub>) δ<sub>C</sub>: 27.26, 29.38, 34.83, 39.79, 54.84, 79.27, 116.84, 123.12, 129.66, 133.30, 134.75, 146.67, 147.19, 156.15, 172.96.

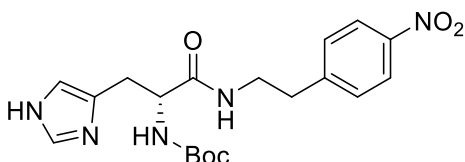

**tert-butyl (R)-3-(1H-imidazol-4-yl)-1-((4-nitrophenethyl)amino)-1-oxopropan-2-yl carbamate:**

Following general synthetic procedure A the title compound was synthesized as a white solid (64%). *R*<sub>f</sub> = 0.28 (MeOH : DCM = 1 : 9). <sup>1</sup>H NMR (400 MHz, MeOH-d<sub>4</sub>) δ<sub>H</sub>: 1.41 (s, 9H), 2.82 (dd, *J* = 14.68, 8.69 Hz, 1H), 2.91 (t, *J* = 6.96 Hz, 2H), 2.99 (dd, *J* = 14.74, 5.34 Hz, 1H), 3.47 (t, *J* = 6.92 Hz, 2H), 4.24 (t, *J* = 6.93 Hz, 1H), 6.86 (s, 1H), 7.45 (d, *J* = 8.48 Hz, 2H), 7.62 (s, 1H), 8.17 (d, *J* = 8.62 Hz, 2H). <sup>13</sup>C NMR (100 MHz, MeOH-d<sub>4</sub>) δ<sub>C</sub>: 27.26, 29.41, 34.83, 39.80, 54.86, 79.27, 116.85, 123.13, 129.66, 133.33, 134.77, 146.67, 147.20, 156.15, 172.98.

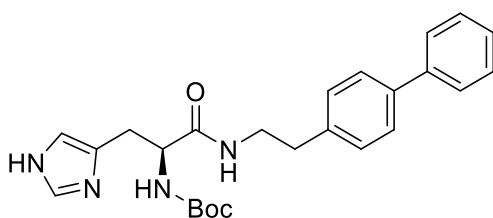

**tert-butyl (S)-1-((2-([1,1'-biphenyl]-4-yl)ethyl)amino)-3-(1H-imidazol-4-yl)-1-oxopropan-2-yl carbamate:** Following general synthetic procedure A the title compound was synthesized as a white solid (67%). *R*<sub>f</sub> = 0.82 (MeOH : DCM = 1 : 9).

<sup>1</sup>H NMR (400 MHz, MeOH-d<sub>4</sub>) δ<sub>H</sub>: 1.40 (s, 9H), 2.79-2.87 (m, 3H), 3.01 (dd, *J* = 14.52, 5.37 Hz, 1H), 3.38-3.52 (m, 2H), 4.27 (t, *J* = 6.82 Hz, 1H), 6.85 (s, 1H), 7.28-7.34 (m, 3H), 7.42 (t, *J* = 7.63 Hz, 2H), 7.54-7.60 (m, 5H). <sup>13</sup>C NMR (100 MHz, MeOH-d<sub>4</sub>) δ<sub>C</sub>:

27.27, 29.50, 34.70, 40.51, 54.89, 79.26, 126.42, 126.69, 126.76, 128.41, 128.95, 134.77, 138.16, 139.18, 140.84, 172.85.

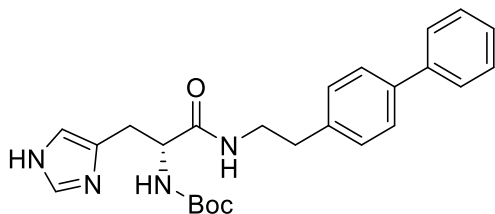

**tert-butyl (R)-tert-butyl (1-((2-([1,1'-biphenyl]-4-yl)ethyl)amino)-3-(1H-imidazol-4-yl)-1-oxopropan-2-yl)carbamate:** Following general synthetic procedure A the title compound was synthesized as a white solid (67%).  $R_f = 0.82$  (MeOH : DCM = 1 : 9).  $^1\text{H NMR}$  (500 MHz, MeOH- $d_4$ )  $\delta_H$ : 1.41 (s, 9H), 2.79-2.87 (m, 3H), 3.01 (dd,  $J = 14.61, 5.32$  Hz, 1H), 3.40-3.48 (m, 2H), 4.27 (t,  $J = 6.82$  Hz, 1H), 6.85 (s, 1H), 7.28-7.34 (m, 3H), 7.42 (t,  $J = 7.67$  Hz, 2H), 7.55-7.60 (m, 5H).  $^{13}\text{C NMR}$  (126 MHz, MeOH- $d_4$ )  $\delta_C$ : 27.27, 29.50, 34.70, 40.51, 54.90, 79.26, 126.42, 126.69, 126.76, 128.41, 128.95, 134.76, 138.16, 139.18, 140.85, 156.16, 172.84.

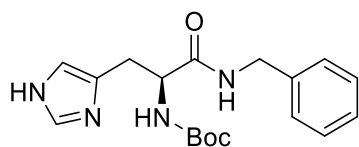

**tert-butyl (S)-tert-butyl (1-(benzylamino)-3-(1H-imidazol-4-yl)-1-oxopropan-2-yl)carbamate:** Following general synthetic procedure A the title compound was synthesized as a white solid (80%).  $R_f = 0.42$  (MeOH : DCM = 1 : 9).  $^1\text{H NMR}$  (400 MHz, MeOH- $d_4$ )  $\delta_H$ : 1.42 (s, 9H), 2.88-2.94 (m, 1H), 3.05-3.10 (m, 1H), 4.31-4.43 (m, 3H), 6.87 (s, 1H), 7.20-7.32 (m, 5H), 7.71 (s, 1H);  $^{13}\text{C NMR}$  (100 MHz, MeOH- $d_4$ )  $\delta_C$ : 27.25, 29.14, 42.61, 54.88, 79.34, 116.95, 126.75, 127.01, 128.07, 132.96, 134.67, 138.35, 156.20, 172.71.

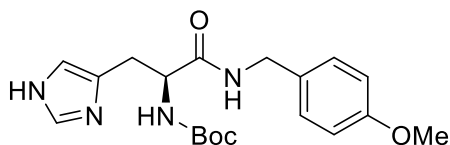

**tert-butyl (S)-(3-(1H-imidazol-4-yl)-1-((4-methoxybenzyl)amino)-1-oxopropan-2-yl)carbamate:**

Following general synthetic procedure A the title compound was synthesized as a white solid (70%).  $R_f = 0.50$  (MeOH : DCM = 1 : 9).  $^1\text{H NMR}$  (400 MHz, MeOH- $d_4$ )  $\delta_H$ : 1.42 (m, 9H), 2.89 (dd,  $J = 14.44$ , 8.39 Hz, 1H), 3.05 (dd,  $J = 14.55$ , 5.74 Hz, 1H), 3.78 (s, 3H), 4.24-4.35 (m, 3H), 6.85 (d,  $J = 8.77$  Hz, 3H), 7.13 (d,  $J = 8.19$  Hz, 2H), 7.62 (s, 1H).  $^{13}\text{C NMR}$  (100 MHz, MeOH- $d_4$ )  $\delta_C$ : 27.26, 29.36, 42.12, 54.29, 54.96, 79.29, 113.45, 116.98, 128.36, 130.31, 133.19, 134.76, 156.18, 158.97, 172.66.

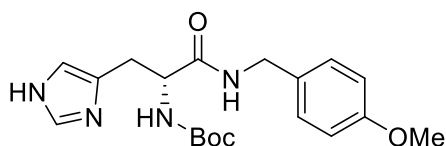

**tert-butyl (S)-(3-(1H-imidazol-4-yl)-1-oxo-1-((4-(trifluoromethyl)phenethyl)amino)propan-2-yl)carbamate:**

Following general synthetic procedure A the title compound was synthesized as a white solid (77%).  $R_f = 0.31$  (MeOH : DCM = 1 : 9).  $^1\text{H NMR}$  (400 MHz, MeOH- $d_4$ )  $\delta_H$ : 1.41 (s, 9H), 2.85-3.06 (m, 2H), 3.78 (s, 3H), 4.29 (m, 3H), 6.83-6.86 (m, 3H), 7.13 (d,  $J = 8$  Hz, 2H), 7.59 (s, 1H).  $^{13}\text{C NMR}$  (100 MHz, MeOH- $d_4$ )  $\delta_C$ : 27.24, 29.38, 42.10, 54.27, 54.98, 79.27, 113.44, 128.36, 130.30, 134.78, 156.27, 158.98, 172.711.

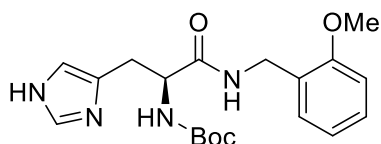

**tert-butyl (S)-(3-(1H-imidazol-4-yl)-1-((2-methoxybenzyl)amino)-1-oxopropan-2-yl)carbamate:**

Following general synthetic procedure A the title compound was synthesized as a white solid (75%).  $R_f = 0.46$  (MeOH : DCM = 1 : 9).  $^1\text{H NMR}$  (500 MHz, MeOH- $d_4$ )  $\delta_H$ : 1.42 (s, 9H), 2.87-2.91 (m, 1H), 3.01-3.07 (m, 1H), 3.85 (s, 3H), 4.32-4.42 (m, 3H), 6.81 (s, 1H), 6.88 (t,  $J = 7.42$  Hz, 1H), 6.95 (d,  $J = 8.17$  Hz, 1H), 7.11 (d,  $J = 7.27$  Hz, 1H), 7.25 (t,  $J = 7.63$  Hz, 1H), 7.60 (s, 1H).  $^{13}\text{C NMR}$  (126 MHz, MeOH- $d_4$ )  $\delta_C$ : 27.26, 29.34, 38.15, 54.43, 54.94, 79.29, 109.92, 117.00, 120.00, 125.81, 128.03, 128.19, 134.74, 156.22, 157.29, 172.75.

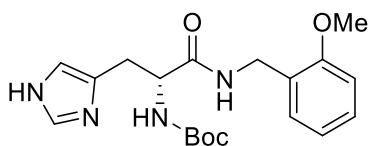

**tert-butyl (R)-(3-(1H-imidazol-4-yl)-1-((2-methoxybenzyl)amino)-1-oxopropan-2-yl)carbamate:**

Following general synthetic procedure A the title compound was synthesized as a white solid (65%).  $R_f = 0.43$  (MeOH : DCM = 1 : 9).  $^1\text{H NMR}$  (400 MHz, MeOH- $d_4$ )  $\delta_{\text{H}}$ : 1.42 (m, 9H), 2.88 (dd,  $J = 14.64, 8.44$  Hz, 1H), 3.05 (dd,  $J = 14.67, 5.51$  Hz, 1H), 3.85 (s, 3H), 4.31-4.42 (m, 3H), 6.81 (s, 1H), 6.88 (t,  $J = 7.40$  Hz, 1H), 6.95 (d,  $J = 8.18$  Hz, 1H), 7.12 (d,  $J = 7.30$  Hz, 1H), 7.25 (t,  $J = 7.16$  Hz, 1H), 7.58 (s, 1H).  $^{13}\text{C NMR}$  (100 MHz, MeOH- $d_4$ )  $\delta_{\text{C}}$ : 27.29, 29.38, 38.16, 54.44, 54.96, 79.29, 109.91, 120.00, 125.81, 128.01, 128.19, 134.76, 156.21, 157.27, 172.77.

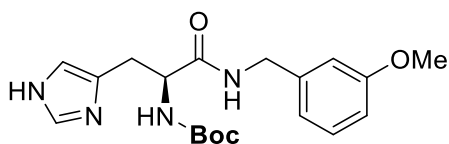

**tert-butyl (S)-(3-(1H-imidazol-4-yl)-1-((3-methoxybenzyl)amino)-1-oxopropan-2-yl)carbamate:**

Following general synthetic procedure A the title compound was synthesized as a white solid (65%).  $R_f = 0.47$  (MeOH : DCM = 1 : 9).  $^1\text{H NMR}$  (500 MHz, MeOH- $d_4$ )  $\delta_{\text{H}}$ : 1.42(s, 9H), 2.88-2.93 (m, 1H), 3.01-3.08 (m, 1H), 3.79 (s, 3H), 4.34 (q,  $J = 13.41$  Hz, 3H), 6.78-6.85 (m, 4H), 7.21 (t,  $J = 7.77$  Hz, 1H), 7.61 (s, 1H).  $^{13}\text{C NMR}$  (126 MHz, MeOH- $d_4$ )  $\delta_{\text{C}}$ : 27.27, 29.36, 42.55, 54.25, 55.01, 79.28, 112.30, 112.50, 119.17, 129.06, 134.78, 139.89, 159.93, 172.88.

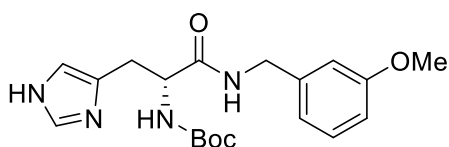



**tert-butyl (R)-(3-(1H-imidazol-4-yl)-1-((3-methoxybenzyl)amino)-1-oxopropan-2-yl)carbamate:**

Following general synthetic procedure A the title compound was synthesized as a white solid (61%).  $R_f = 0.42$  (MeOH : DCM = 1 : 9).  $^1\text{H NMR}$  (400 MHz, MeOH- $d_4$ )  $\delta_H$ : 1.42 (s, 9H), 2.90 (dd,  $J = 14.61, 8.45$  Hz, 1H), 3.06 (dd,  $J = 14.70, 5.65$  Hz, 1H), 3.79 (m, 3H), 4.30- 4.39 (m, 3H), 6.81 (dd,  $J = 18.07, 7.73$  Hz, 4H), 7.21 (t,  $J = 7.79$  Hz, 1H), 7.61 (s, 1H).  $^{13}\text{C NMR}$  (100 MHz, MeOH- $d_4$ )  $\delta_C$ : 27.26, 29.34, 42.55, 54.25, 55.00, 79.29, 112.30, 112.50, 116.91, 119.19, 129.06, 133.29, 134.77, 139.90, 156.20, 159.93, 172.90.

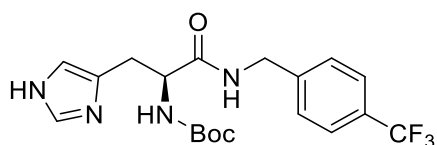

**tert-butyl (S)-(3-(1H-imidazol-4-yl)-1-oxo-1-((4-(trifluoromethyl)benzyl)amino)propan-2-yl)carbamate:**

Following general synthetic procedure A the title compound was synthesized as a white solid (74%).  $R_f = 0.39$  (MeOH : DCM = 1 : 9).  $^1\text{H NMR}$  (400 MHz, MeOH- $d_4$ )  $\delta_H$ : 1.43 (s, 9H), 2.89-2.95 (m, 1H), 3.01-3.09 (m, 1H), 4.33-4.50 (m, 3H), 6.87 (s, 1H), 7.38 (d,  $J = 7.6$  Hz, 2H), 7.58-7.62 (m, 3H);  $^{13}\text{C NMR}$  (100 MHz, MeOH- $d_4$ )  $\delta_C$ : 27.24, 29.24, 42.06, 55.08, 79.32, 116.96, 123.22, 124.87, 125.64, 127.19, 127.38, 129.04, 134.85, 143.15, 156.21, 173.16.

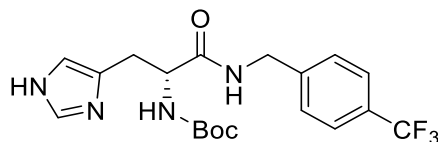

**tert-butyl (R)-(3-(1H-imidazol-4-yl)-1-oxo-1-((4-(trifluoromethyl)benzyl)amino)propan-2-yl)carbamate:**

Following general synthetic procedure A the title compound was synthesized as a white solid (69%).  $R_f = 0.31$  (MeOH : DCM = 1 : 9).  $^1\text{H NMR}$  (400 MHz, MeOH- $d_4$ )  $\delta_H$ : 1.41 (s, 9H), 2.93-3.08 (m, 2H), 4.36-4.44 (m, 3H), 6.93 (s, 1H), 7.39 (s, 2H), 7.58 (s, 2H), 7.80 (s, 1H);  $^{13}\text{C NMR}$  (100 MHz,

MeOH-d<sub>4</sub>)  $\delta_C$ : 27.23, 28.86, 42.09, 54.87, 79.41, 116.89, 122.98, 124.88, 125.67, 127.41, 132.86, 134.65, 143.12, 156.23, 172.91.

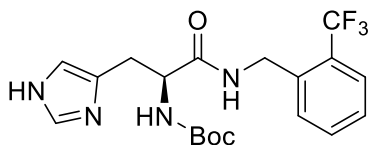

**tert-butyl (S)-3-(1H-imidazol-4-yl)-1-oxo-1-((2-(trifluoromethyl)benzyl)amino)propan-2-**

**yl)carbamate:** Following general synthetic procedure A the title compound was synthesized as a white solid (64%).  $R_f$  = 0.45 (MeOH : DCM = 1 : 9).  $^1\text{H}$  NMR (400 MHz, MeOH-d<sub>4</sub>)  $\delta_H$ : 1.42 (s, 9H), 2.92 (dd,  $J$  = 14.61, 8.18 Hz, 1H), 3.06 (dd,  $J$  = 14.65, 5.96 Hz, 1H), 4.36 (t,  $J$  = 6.90 Hz, 1H), 4.56 (q,  $J$  = 12.57 Hz, 2H), 6.86 (s, 1H), 7.35-7.43 (m, 2H), 7.54 (t,  $J$  = 7.55 Hz, 1H), 7.63 - 7.67 (m, 2H).  $^{13}\text{C}$  NMR (100 MHz, MeOH-d<sub>4</sub>)  $\delta_C$ : 25.72, 27.62, 37.60, 53.54, 77.81, 115.34, 121.66, 123.83, 123.89, 124.37, 125.46, 126.86, 130.49, 133.32, 135.07, 154.74, 171.69.

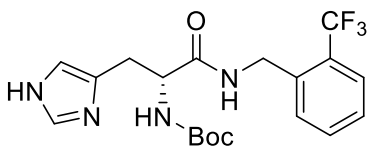

**tert-butyl (R)-3-(1H-imidazol-4-yl)-1-oxo-1-((2-(trifluoromethyl)benzyl)amino)propan-2-**

**yl)carbamate:** Following general synthetic procedure A the title compound was synthesized as a white solid (72%).  $R_f$  = 0.45 (MeOH : DCM = 1 : 9).  $^1\text{H}$  NMR (500 MHz, MeOH-d<sub>4</sub>)  $\delta_H$ : 1.43 (s, 9H), 2.95 (dd,  $J$  = 14.60, 8.19 Hz, 1H), 3.09 (dd,  $J$  = 14.62, 5.88 Hz, 1H), 4.40 (t,  $J$  = 6.91 Hz, 1H), 4.58 (q,  $J$  = 15.54 Hz, 2H), 6.88 (s, 1H), 7.37-7.43 (m, 2H), 7.54 (t,  $J$  = 7.50 Hz, 1H), 7.63 (s, 1H), 7.67 (d,  $J$  = 7.74 Hz, 1H).  $^{13}\text{C}$  NMR (126 MHz, MeOH-d<sub>4</sub>)  $\delta_C$ : 27.30, 29.24, 39.14, 55.13, 79.36, 116.91, 121.29, 123.46, 125.33, 125.37, 125.43, 125.63, 126.99, 127.06, 127.31, 127.81, 128.39, 132.03, 133.40, 134.89, 136.61, 156.27, 173.27.

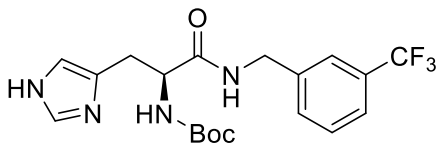

**tert-butyl (S)-3-(1H-imidazol-4-yl)-1-oxo-1-((3-(trifluoromethyl)benzyl)amino)propan-2-yl carbamate:** Following general synthetic procedure A the title compound was synthesized as a white solid (82%).  $R_f = 0.33$  (MeOH : DCM = 1 : 9).  $^1\text{H NMR}$  (500 MHz, MeOH- $d_4$ )  $\delta_{\text{H}}$ : 1.42 (s, 9H), 2.88-2.93 (m, 1H), 3.04-3.08 (m, 1H), 4.32-4.46 (m, 3H), 6.84 (s, 1H), 7.47-7.60 (m, 5H);  $^{13}\text{C NMR}$  (125 MHz, MeOH- $d_4$ )  $\delta_{\text{C}}$ : 27.2, 29.6, 42.1, 55.0, 79.3, 116.8, 123.1, 123.4, 123.7, 125.3, 130.2, 130.4, 130.7, 134.8, 140.0, 156.2, 173.1.

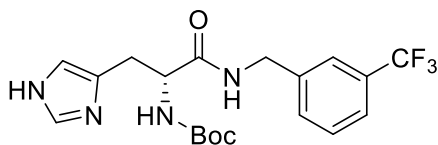

**tert-butyl (R)-3-(1H-imidazol-4-yl)-1-oxo-1-((3-(trifluoromethyl)benzyl)amino)propan-2-yl carbamate:** Following general synthetic procedure A the title compound was synthesized as a white solid (74%).  $R_f = 0.35$  (MeOH : DCM = 1 : 9).  $^1\text{H NMR}$  (400 MHz, DMSO- $d_6$ )  $\delta_{\text{H}}$ : 1.42 (s, 9H), 2.88-2.93 (m, 1H), 3.04-3.08 (m, 1H), 4.32-4.47 (m, 3H), 6.84 (s, 1H), 7.47-7.61 (m, 5H);  $^{13}\text{C NMR}$  (100 MHz, DMSO- $d_6$ )  $\delta_{\text{C}}$ : 27.2, 29.2, 42.0, 55.0, 79.3, 99.9, 123.1, 123.4, 123.7, 125.3, 128.3, 130.2, 130.4, 130.7, 134.8, 139.9, 156.2, 173.1.

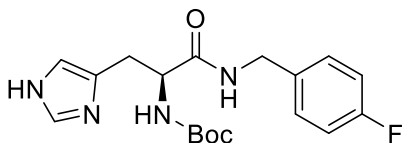

**tert-butyl (S)-1-((4-fluorobenzyl)amino)-3-(1H-imidazol-4-yl)-1-oxopropan-2-yl carbamate:** Following general synthetic procedure A the title compound was synthesized as a white solid (86%).  $R_f = 0.34$  (MeOH : DCM = 1 : 9).  $^1\text{H NMR}$  (400 MHz, MeOH- $d_4$ )  $\delta_{\text{H}}$ : 1.42 (s, 9H), 2.87-2.92 (m, 1H), 3.02-

3.07 (m, 1H), 4.34 (q,  $J = 14.3$  Hz, 3H), 6.84 (s, 1H), 7.02 (t,  $J = 8.8$  Hz, 2H), 7.21 (t,  $J = 6.6$  Hz), 7.61 (s, 1H);  $^{13}\text{C}$  NMR (100 MHz, MeOH- $d_4$ )  $\delta_{\text{C}}$ : 27.24, 29.29, 41.84, 55.01, 79.30, 114.62, 128.93, 134.80, 163.34, 172.88.

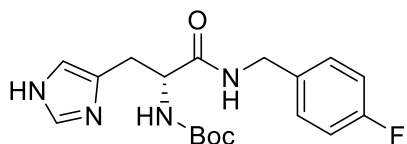

**tert-butyl (R)-1-((4-fluorobenzyl)amino)-3-(1H-imidazol-4-yl)-1-oxopropan-2-yl carbamate:**

Following general synthetic procedure A the title compound was synthesized as a white solid (70 %).  $R_f = 0.33$  (MeOH : DCM = 1 : 9).  $^1\text{H}$  NMR (400 MHz, MeOH- $d_4$ )  $\delta_{\text{H}}$ : 1.41 (s, 9H), 2.94-3.00 (m, 1H), 3.08-3.22 (m, 1H), 4.27-4.40 (m, 3H), 7.04 (t,  $J = 8.6$  Hz, 2H), 7.14 (s, 1H), 7.26-7.29 (m, 2H), 8.43 (s, 1H);  $^{13}\text{C}$  NMR (100 MHz, MeOH- $d_4$ )  $\delta_{\text{C}}$ : 27.18, 27.71, 35.60, 41.96, 54.05, 79.66, 114.7, 116.95, 128.98, 129.08, 131.08, 133.89, 134.43, 163.39, 174.42.

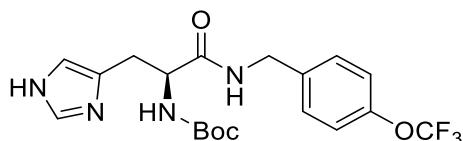

**tert-butyl (S)-3-(1H-imidazol-4-yl)-1-oxo-1-((4-(trifluoromethoxy)benzyl)amino)propan-2-yl carbamate:** Following general synthetic procedure A the title compound was synthesized as a white solid (89%).  $R_f = 0.38$  (MeOH : DCM = 1 : 9).

$^1\text{H}$  NMR (400 MHz, MeOH- $d_4$ )  $\delta_{\text{H}}$ : 1.42 (s, 9H), 2.87-2.93 (m, 1H), 3.03-3.08 (m, 1H), 4.31-4.43 (m, 3H), 6.85 (s, 1H), 7.20 (d,  $J = 8.4$  Hz, 2H), 7.29 (d,  $J = 8.4$  Hz, 2H), 7.60 (s, 1H);  $^{13}\text{C}$  NMR (100 MHz, MeOH- $d_4$ )  $\delta_{\text{C}}$ : 27.25, 29.29, 41.80, 55.08, 79.31, 119.26, 120.61, 121.79, 128.61, 134.85, 137.83, 148.11, 156.23, 173.05.

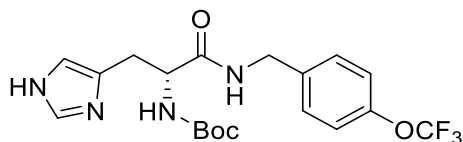

**tert-butyl (R)-(3-(1H-imidazol-4-yl)-1-oxo-1-((4-(trifluoromethoxy)benzyl)amino)propan-2-**

**yl)carbamate:** Following general synthetic procedure A the title compound was synthesized as a white solid (91%).  $R_f = 0.29$  (MeOH : DCM = 1 : 9).  $^1\text{H NMR}$  (400 MHz, MeOH- $d_4$ )  $\delta_H$ : 1.42 (s, 9H), 2.87-2.93 (m, 1H), 3.01-3.08 (m, 1H), 4.31-4.43 (m, 3H), 6.85 (s, 1H), 7.20 (d,  $J = 8$  Hz, 2H), 7.29 (d,  $J = 8.4$  Hz, 2H), 7.60 (s, 1H);  $^{13}\text{C NMR}$  (100 MHz, MeOH- $d_4$ )  $\delta_C$ : 27.23, 29.26, 41.79, 55.07, 79.30, 119.25, 120.60, 121.79, 128.61, 134.83, 137.83, 148.10, 156.22, 173.04.

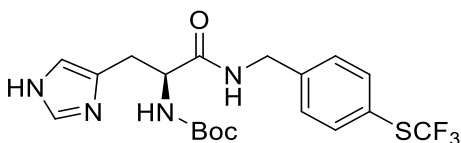

**tert-butyl (S)-(3-(1H-imidazol-4-yl)-1-oxo-1-((4-(trifluoromethylthio)benzyl)amino)propan-2-**

**yl)carbamate:** Following general synthetic procedure A the title compound was synthesized as a white solid (66%).  $R_f = 0.53$  (MeOH : DCM = 1 : 9).  $^1\text{H NMR}$  (400 MHz, MeOH- $d_4$ )  $\delta_H$ : 1.43 (s, 9H), 2.92 (dd,  $J = 14.60, 8.27$  Hz, 1H), 3.07 (dd,  $J = 14.68, 5.89$  Hz, 1H), 4.35 (dd,  $J = 13.14, 5.62$  Hz, 1H), 4.42-4.48 (m, 2H), 6.87 (s, 1H), 7.33 (d,  $J = 7.92$  Hz, 2H), 7.62 (d,  $J = 6.18$  Hz, 3H).  $^{13}\text{C NMR}$  (100 MHz, MeOH- $d_4$ )  $\delta_C$ : 27.26, 29.21, 42.01, 55.08, 79.34, 116.88, 122.17, 128.16, 128.25, 131.30, 134.82, 136.16, 142.35, 156.24, 173.12.

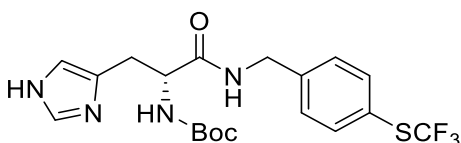

**tert-butyl (R)-(3-(1H-imidazol-4-yl)-1-oxo-1-((4-(trifluoromethylthio)benzyl)amino)propan-2-**

**yl)carbamate:** Following general synthetic procedure A the title compound was synthesized as a white solid (64%).  $R_f = 0.53$  (MeOH : DCM = 1 : 9).  $^1\text{H NMR}$  (500 MHz, MeOH- $d_4$ )  $\delta_H$ : 1.43 (s, 9H), 2.92 (dd,  $J = 14.66, 8.20$  Hz, 1H), 3.07 (dd,  $J = 14.64, 5.93$  Hz, 1H), 4.35 (t,  $J = 6.98$  Hz, 1H), 4.43 (q,  $J = 13.72$  Hz, 2H), 6.88 (s, 1H), 7.33 (d,  $J = 7.92$  Hz, 2H), 7.62-7.66 (m, 3H).  $^{13}\text{C NMR}$  (126 MHz, MeOH- $d_4$ )  $\delta_C$ :

27.28, 29.19, 42.02, 55.07, 79.35, 116.91, 122.17, 128.17, 128.56, 131.00, 133.28, 134.82, 136.16, 142.35, 156.24, 173.10.

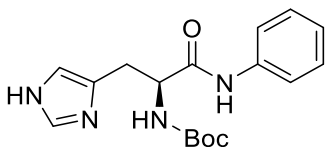

**tert-butyl (S)-3-(1H-imidazol-4-yl)-1-oxo-1-(phenylamino)propan-2-yl carbamate:** Following general synthetic procedure A the title compound was synthesized as a white solid (64%).  $R_f = 0.30$  (MeOH : DCM = 1 : 9).  $^1\text{H NMR}$  (400 MHz, MeOH- $d_4$ )  $\delta_H$ : 1.43 (s, 9H), 2.96 (dd,  $J = 14.38, 8.28$  Hz, 1H), 3.10 (dd,  $J = 14.50, 5.68$  Hz, 1H), 4.43 (t,  $J = 6.62$  Hz, 1H), 6.90 (s, 1H), 7.11 (t,  $J = 7.41$  Hz, 1H), 7.31 (t,  $J = 7.89$  Hz, 2H), 7.52 (d,  $J = 7.87$  Hz, 2H), 7.63 (s, 1H).  $^{13}\text{C NMR}$  (100 MHz, MeOH- $d_4$ )  $\delta_C$ : 25.73, 28.13, 53.94, 77.80, 115.27, 118.63, 122.51, 126.85, 133.29, 136.47, 154.76, 169.77.

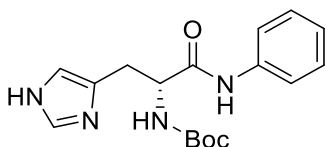

**tert-butyl (R)-3-(1H-imidazol-4-yl)-1-oxo-1-(phenylamino)propan-2-yl carbamate:** Following general synthetic procedure A the title compound was synthesized as a white solid (68%).  $R_f = 0.30$  (MeOH : DCM = 1 : 9).  $^1\text{H NMR}$  (400 MHz, MeOH- $d_4$ )  $\delta_H$ : 1.44 (s, 9H), 2.96 (dd,  $J = 14.59, 8.28$  Hz, 1H), 3.10 (dd,  $J = 14.73, 5.59$  Hz, 1H), 4.43 (t,  $J = 6.75$  Hz, 1H), 6.90 (s, 1H), 7.11 (t,  $J = 7.42$  Hz, 1H), 7.31 (t,  $J = 7.92$  Hz, 2H), 7.53 (d,  $J = 7.73$  Hz, 2H), 7.63 (s, 1H).  $^{13}\text{C NMR}$  (100 MHz, MeOH- $d_4$ )  $\delta_C$ : 27.27, 29.67, 55.47, 79.34, 116.81, 120.16, 124.04, 128.39, 133.31, 134.82, 138.00, 156.30, 171.30.

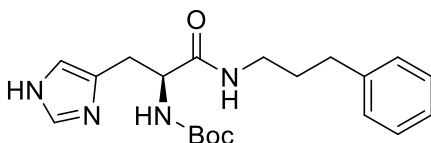

**tert-butyl (S)-(3-(1H-imidazol-4-yl)-1-oxo-1-((3-phenylpropyl)amino)propan-2-yl)carbamate:**

Following general synthetic procedure A the title compound was synthesized as a white solid (55%).  $R_f = 0.53$  (MeOH : DCM = 1 : 9).  $^1\text{H NMR}$  (400 MHz, MeOH- $d_4$ )  $\delta_{\text{H}}$ : 1.42 (s, 9H), 1.73-1.81 (m, 2H), 2.59 (t,  $J = 7.76$  Hz, 2H), 2.88 (dd,  $J = 14.68, 8.34$  Hz, 1H), 3.03 (dd,  $J = 14.63, 5.65$  Hz, 1H), 3.14-3.26 (m, 2H), 4.28 (t,  $J = 6.85$  Hz, 1H), 6.88 (s, 1H), 7.14-7.19 (m, 3H), 7.26 (t,  $J = 7.44$  Hz, 2H), 7.61 (s, 1H).  $^{13}\text{C NMR}$  (100 MHz, MeOH- $d_4$ )  $\delta_{\text{C}}$ : 27.29, 29.46, 30.81, 32.61, 38.57, 54.98, 79.27, 116.98, 125.49, 127.99, 128.04, 133.28, 134.78, 141.60, 156.16, 172.85.

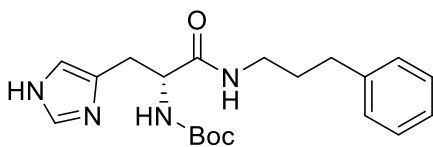

**tert-butyl (R)-(3-(1H-imidazol-4-yl)-1-oxo-1-((3-phenylpropyl)amino)propan-2-yl)carbamate:**

Following general synthetic procedure A the title compound was synthesized as a white solid (54%).  $R_f = 0.53$  (MeOH : DCM = 1 : 9).  $^1\text{H NMR}$  (500 MHz, MeOH- $d_4$ )  $\delta_{\text{H}}$ : 1.42 (s, 9H), 1.74-1.79 (m, 2H), 2.58 (t,  $J = 7.68$  Hz, 2H), 2.89 (dd,  $J = 14.59, 8.36$  Hz, 1H), 3.04 (dd,  $J = 14.66, 5.68$  Hz, 1H), 3.14-3.24 (m, 2H), 4.30 (t,  $J = 6.83$  Hz, 1H), 6.88 (s, 1H), 7.14-7.18 (m, 3H), 7.25 (t,  $J = 7.52$  Hz, 2H), 7.61 (s, 1H).  $^{13}\text{C NMR}$  (126 MHz, MeOH- $d_4$ )  $\delta_{\text{C}}$ : 27.36, 29.52, 30.81, 32.63, 38.60, 55.00, 79.27, 117.05, 125.52, 128.02, 128.07, 133.29, 134.82, 141.59, 156.16, 172.85.

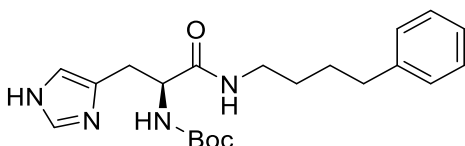

**tert-butyl (S)-(3-(1H-imidazol-4-yl)-1-oxo-1-((4-phenylbutyl)amino)propan-2-yl)carbamate:**

Following general synthetic procedure A the title compound was synthesized as a white solid (51%).  $R_f = 0.42$  (MeOH : DCM = 1 : 9).  $^1\text{H NMR}$  (500 MHz, MeOH- $d_4$ )  $\delta_{\text{H}}$ : 1.41 (s, 9H), 1.46-1.52 (m, 2H), 1.57-1.63 (m, 2H), 2.61 (t,  $J = 7.50$  Hz, 2H), 2.86 (dd,  $J = 14.68, 8.49$  Hz, 1H), 3.02 (dd,  $J = 14.61, 5.51$  Hz,

1H), 3.14-3.25 (m, 2H), 4.26 (t,  $J = 6.77$  Hz, 1H), 6.86 (s, 1H), 7.14-7.19 (m, 3H), 7.25 (t,  $J = 7.53$  Hz, 2H), 7.59 (s, 1H).  $^{13}\text{C}$  NMR (126 MHz, MeOH- $d_4$ )  $\delta_{\text{C}}$ : 27.29, 28.35, 28.54, 29.49, 35.07, 38.74, 54.95, 79.25, 117.00, 125.35, 127.91, 127.98, 128.06, 133.25, 134.76, 142.14, 156.14, 172.77.

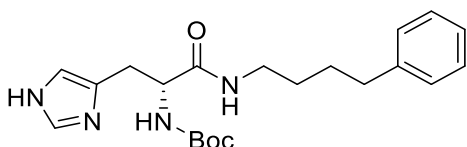

**tert-butyl (R)-3-(1H-imidazol-4-yl)-1-oxo-1-((4-phenylbutyl)amino)propan-2-yl carbamate:**

Following general synthetic procedure A the title compound was synthesized as a white solid (50%).  $R_f = 0.42$  (MeOH : DCM = 1 : 9).  $^1\text{H}$  NMR (500 MHz, MeOH- $d_4$ )  $\delta_{\text{H}}$ : 1.41 (s, 9H), 1.46-1.52 (m, 2H), 1.57-1.63 (m, 2H), 2.61 (t,  $J = 7.50$  Hz, 2H), 2.86 (q,  $J = 7.13$  Hz, 1H), 3.00-3.04 (m, 1H), 3.14-3.25 (m, 2H), 4.27 (t,  $J = 6.81$  Hz, 1H), 6.87 (s, 1H), 7.13-7.19 (m, 3H), 7.24-7.27 (m, 2H), 7.61 (s, 1H).  $^{13}\text{C}$  NMR (126 MHz, MeOH- $d_4$ )  $\delta_{\text{C}}$ : 27.30, 28.36, 28.54, 29.44, 35.07, 38.75, 54.93, 79.26, 117.00, 125.35, 127.91, 128.07, 133.18, 134.74, 142.13, 156.14, 172.73.

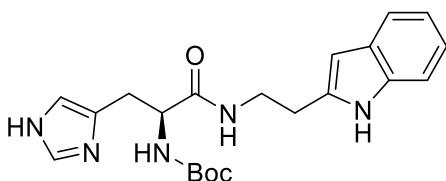

**tert-butyl (S)-1-((2-(1H-indol-2-yl)ethyl)amino)-3-(1H-imidazol-4-yl)-1-oxopropan-2-yl carbamate:**

Following general synthetic procedure A the title compound was synthesized as a yellowish solid (75%).  $R_f = 0.35$  (MeOH : DCM = 1 : 9).  $^1\text{H}$  NMR (400 MHz, MeOH- $d_4$ )  $\delta_{\text{H}}$ : 1.40 (s, 9H), 2.81-2.87 (m, 1H), 3.02 (dd,  $J = 14.86, 5.26$  Hz, 1H), 3.43-3.54 (m, 2H), 4.26-4.29 (m, 1H), 6.86 (s, 1H), 7.00-7.12 (m, 3H), 7.33-7.35 (m, 1H), 7.57 (d,  $J = 7.85$  Hz, 1H), 7.68 (s, 1H).  $^{13}\text{C}$  NMR (100 MHz, MeOH- $d_4$ )  $\delta_{\text{C}}$ : 24.77, 27.24, 29.26, 39.85, 54.80, 79.32, 110.85, 111.62, 117.08, 117.86, 118.24, 120.95, 122.08, 127.29, 132.93, 134.63, 136.79, 156.16, 172.61.



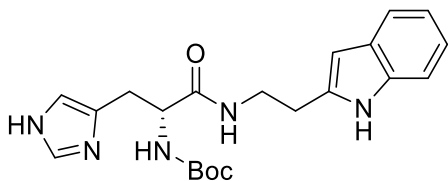

**tert-butyl (R)-1-((2-(1H-indol-2-yl)ethyl)amino)-3-(1H-imidazol-4-yl)-1-oxopropan-2-yl carbamate:** Following general synthetic procedure A the title compound was synthesized as a yellowish solid (73%).  $R_f = 0.35$  (MeOH : DCM = 1 : 9).  $^1\text{H NMR}$  (400 MHz, MeOH- $d_4$ )  $\delta_H$ : 1.40 (s, 9H), 2.81-2.86 (m, 1H), 2.96-3.03 (m, 1H), 3.42-3.54 (m, 2H), 4.25-4.28 (m, 1H), 6.83 (s, 1H), 7.00-7.12 (m, 3H), 7.33-7.35 (m, 1H), 7.55-7.58 (m, 2H).  $^{13}\text{C NMR}$  (100 MHz, MeOH- $d_4$ )  $\delta_C$ : 23.24, 25.71, 27.91, 38.29, 53.37, 77.75, 109.31, 110.09, 116.33, 116.70, 119.42, 120.55, 125.76, 131.63, 133.21, 135.25, 154.63, 171.21.

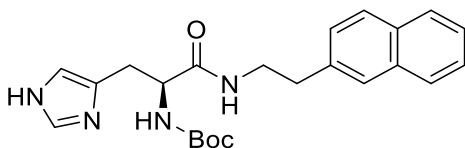

**tert-butyl (S)-3-(1H-imidazol-4-yl)-1-((2-(naphthalen-2-yl)ethyl)amino)-1-oxopropan-2-yl carbamate:** Following general synthetic procedure A the title compound was synthesized as a white solid (60%).  $R_f = 0.60$  (MeOH : DCM = 1 : 9).  $^1\text{H NMR}$  (400 MHz, MeOH- $d_4$ )  $\delta_H$ : 1.37 (s, 9H), 2.81 (dd,  $J = 14.74, 8.61$  Hz, 1H), 2.91-3.01 (m, 3H), 3.44-3.57 (m, 2H), 4.25 (t,  $J = 6.82$  Hz, 1H), 6.82 (s, 1H), 7.36 (d,  $J = 8.50$  Hz, 1H), 7.40-7.46 (m, 2H), 7.58 (s, 1H), 7.67 (s, 1H), 7.80 (td,  $J = 4.45, 2.81$  Hz, 3H).  $^{13}\text{C NMR}$  (100 MHz, MeOH- $d_4$ )  $\delta_C$ : 15.06, 27.23, 29.44, 35.18, 40.40, 54.86, 79.28, 116.98, 125.00, 125.58, 126.74, 126.92, 127.18, 127.71, 132.37, 133.71, 134.74, 136.50, 156.19, 172.87.

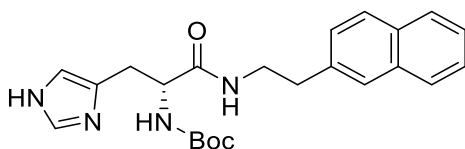

**tert-butyl (R)-(3-(1H-imidazol-4-yl)-1-((2-(naphthalen-2-yl)ethyl)amino)-1-oxopropan-2-**

**yl)carbamate:** Following general synthetic procedure A the title compound was synthesized as a white solid (61%).  $R_f = 0.60$  (MeOH : DCM = 1 : 9).  $^1\text{H NMR}$  (400 MHz, MeOH- $d_4$ )  $\delta_H$ : 1.38 (s, 9H), 2.81 (dd,  $J = 14.61, 8.50$  Hz, 1H), 2.92-3.02 (m, 3H), 3.45-3.58 (m, 2H), 4.25 (t,  $J = 6.92$  Hz, 1H), 6.83 (s, 1H), 7.37 (dd,  $J = 8.47, 1.14$  Hz, 1H), 7.40-7.47 (m, 2H), 7.59 (s, 1H), 7.67 (s, 1H), 7.80 (dt,  $J = 6.67, 2.28$  Hz, 3H).  $^{13}\text{C NMR}$  (100 MHz, MeOH- $d_4$ )  $\delta_C$ : 27.22, 29.42, 35.17, 40.39, 54.87, 79.25, 116.98, 125.00, 125.58, 126.73, 126.92, 127.18, 127.71, 132.37, 133.72, 134.73, 136.51, 156.16, 172.85.

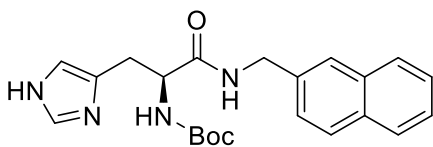

**tert-butyl (S)-(3-(1H-imidazol-4-yl)-1-((naphthalen-2-ylmethyl)amino)-1-oxopropan-2-**

**yl)carbamate:** Following general synthetic procedure A the title compound was synthesized as a white solid (72%).  $R_f = 0.80$  (MeOH : DCM = 1 : 9).  $^1\text{H NMR}$  (500 MHz, MeOH- $d_4$ )  $\delta_H$ : 1.42 (s, 9H), 2.94 (dd,  $J = 14.60, 8.38$  Hz, 1H), 3.09 (dd,  $J = 14.68, 5.66$  Hz, 1H), 4.39 (t,  $J = 6.84$  Hz, 1H), 4.54 (q,  $J = 16.76$  Hz, 2H), 6.87 (s, 1H), 7.33 (d,  $J = 8.35$  Hz, 1H), 7.43-7.48 (m, 2H), 7.60 (s, 1H), 7.70 (s, 1H), 7.79-7.83 (m, 3H).  $^{13}\text{C NMR}$  (126 MHz, MeOH- $d_4$ )  $\delta_C$ : 27.08, 27.29, 29.38, 42.75, 55.09, 79.31, 116.96, 125.28, 125.35, 125.39, 125.73, 127.24, 127.36, 127.80, 132.76, 133.47, 134.82, 135.81, 156.26, 173.04.

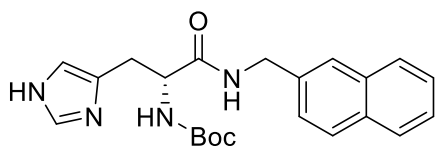

**tert-butyl (R)-(3-(1H-imidazol-4-yl)-1-((naphthalen-2-ylmethyl)amino)-1-oxopropan-2-**

**yl)carbamate:** Following general synthetic procedure A the title compound was synthesized as a white solid (70%).  $R_f = 0.80$  (MeOH : DCM = 1 : 9).  $^1\text{H NMR}$  (500 MHz, MeOH- $d_4$ )  $\delta_H$ : 1.42 (s, 9H), 2.94 (dd,  $J = 14.61, 8.29$  Hz, 1H), 3.09 (dd,  $J = 14.62, 5.70$  Hz, 1H), 4.39 (t,  $J = 6.86$  Hz, 1H), 4.54 (q,  $J = 16.77$

Hz, 2H), 6.87 (s, 1H), 7.33 (d,  $J = 8.32$  Hz, 1H), 7.43-7.48 (m, 2H), 7.60 (s, 1H), 7.70 (s, 1H), 7.79-7.83 (m, 3H).  $^{13}\text{C}$  NMR (126 MHz, MeOH- $d_4$ )  $\delta_{\text{C}}$ : 27.29, 29.39, 42.75, 55.09, 79.31, 117.11, 125.27, 125.35, 125.39, 125.72, 127.23, 127.35, 127.79, 132.75, 133.46, 134.82, 135.81, 156.25, 173.03.

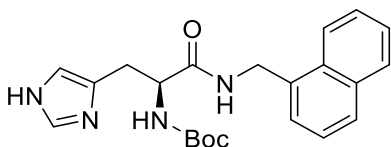

**tert-butyl (S)-(3-(1H-imidazol-4-yl)-1-((naphthalen-1-ylmethyl)amino)-1-oxopropan-2-**

**yl)carbamate:** Following general synthetic procedure A the title compound was synthesized as a white solid (76%).  $R_f = 0.50$  (MeOH : DCM = 1 : 9).  $^1\text{H}$  NMR (400 MHz, MeOH- $d_4$ )  $\delta_{\text{H}}$ : 1.39 (s, 9H), 2.90 (dd,  $J = 14.60, 8.36$  Hz, 1H), 3.04-3.08 (m, 1H), 4.37 (t,  $J = 6.87$  Hz, 1H), 4.83 (q,  $J = 21.08$  Hz, 2H), 6.83 (s, 1H), 7.39 (dt,  $J = 18.35, 8.43$  Hz, 2H), 7.48-7.54 (m, 2H), 7.58 (s, 1H), 7.80 (d,  $J = 8.0$  Hz, 1H), 7.88 (d,  $J = 7.5$  Hz, 1H), 7.99 (d,  $J = 7.76$  Hz, 1H).  $^{13}\text{C}$  NMR (100 MHz, MeOH- $d_4$ )  $\delta_{\text{C}}$ : 27.27, 29.40, 40.75, 54.99, 79.28, 116.90, 122.95, 124.98, 125.29, 125.32, 125.34, 125.43, 125.98, 127.75, 128.32, 131.23, 133.23, 133.30, 133.89, 134.75, 156.19, 172.73.

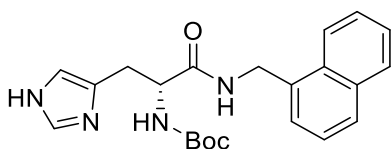

**tert-butyl (R)-(3-(1H-imidazol-4-yl)-1-((naphthalen-1-ylmethyl)amino)-1-oxopropan-2-**

**yl)carbamate:** Following general synthetic procedure A the title compound was synthesized as a white solid (75%).  $R_f = 0.50$  (MeOH : DCM = 1 : 9).  $^1\text{H}$  NMR (400 MHz, MeOH- $d_4$ )  $\delta_{\text{H}}$ : 1.39 (s, 9H), 2.90 (dd,  $J = 14.60, 8.34$  Hz, 1H), 3.05 (dd,  $J = 14.63, 5.61$  Hz, 1H), 4.36 (t,  $J = 6.91$  Hz, 1H), 4.82 (t,  $J = 16.60$  Hz, 2H), 6.82 (s, 1H), 7.37-7.44 (m, 2H), 7.48-7.58 (m, 3H), 7.81 (d,  $J = 7.95$  Hz, 1H), 7.89 (dd,  $J = 7.21, 2.11$  Hz, 1H), 8.00 (d,  $J = 7.82$  Hz, 1H).  $^{13}\text{C}$  NMR (100 MHz, MeOH- $d_4$ )  $\delta_{\text{C}}$ : 27.00, 27.25, 29.43,

40.74, 55.01, 79.28, 116.92, 122.96, 124.99, 125.33, 125.35, 125.44, 125.99, 127.75, 128.32, 131.24, 133.31, 133.90, 134.78, 156.22, 172.78.

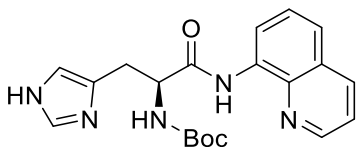

**tert-butyl (S)-tert-butyl (3-(1H-imidazol-4-yl)-1-oxo-1-(quinolin-8-ylamino)propan-2-yl)carbamate:**

Following general synthetic procedure A the title compound was synthesized as a yellowish solid (56%).  $R_f = 0.53$  (MeOH : DCM = 1 : 9).  $^1\text{H NMR}$  (400 MHz, MeOH- $d_4$ )  $\delta_H$ : 1.48 (s, 9H), 3.07 (dd,  $J = 14.87$ , 9.10 Hz, 1H), 3.29 (d,  $J = 4.75$  Hz, 1H), 4.59 (dd,  $J = 8.86$ , 5.15 Hz, 1H), 6.93 (s, 1H), 7.54-7.58 (m, 2H), 7.64 (dd,  $J = 9.25$ , 2.05 Hz, 2H), 8.30 (dd,  $J = 8.32$ , 1.60 Hz, 1H), 8.68 (dd,  $J = 7.60$ , 1.35 Hz, 1H), 8.84 (dd,  $J = 4.24$ , 1.66 Hz, 1H).  $^{13}\text{C NMR}$  (100 MHz, MeOH- $d_4$ )  $\delta_C$ : 27.33, 28.70, 56.18, 79.67, 116.19, 121.70, 122.11, 126.59, 128.12, 133.68, 134.95, 136.15, 138.56, 148.47, 156.56, 171.00.

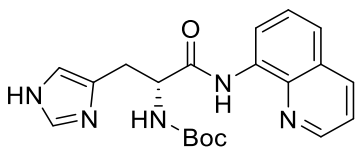

**tert-butyl (R)-tert-butyl (3-(1H-imidazol-4-yl)-1-oxo-1-(quinolin-8-ylamino)propan-2-yl)carbamate:**

Following general synthetic procedure A the title compound was synthesized as a yellowish solid (54%).  $R_f = 0.53$  (MeOH : DCM = 1 : 9).  $^1\text{H NMR}$  (400 MHz, MeOH- $d_4$ )  $\delta_H$ : 1.48 (s, 9H), 3.07 (dd,  $J = 14.69$ , 8.99 Hz, 1H), 3.28 (d,  $J = 4.83$  Hz, 1H), 4.59 (dd,  $J = 8.62$ , 5.10 Hz, 1H), 6.93 (s, 1H), 7.54-7.58 (m, 2H), 7.63 (d,  $J = 5.26$  Hz, 2H), 8.30 (dd,  $J = 8.31$ , 1.54 Hz, 1H), 8.68 (dd,  $J = 7.59$ , 1.28 Hz, 1H), 8.84 (dd,  $J = 4.22$ , 1.62 Hz, 1H).  $^{13}\text{C NMR}$  (100 MHz, MeOH- $d_4$ )  $\delta_C$ : 27.35, 28.79, 56.23, 79.66, 116.18, 117.12, 121.68, 122.09, 126.57, 128.08, 133.41, 133.66, 134.98, 136.12, 138.53, 148.44, 156.54, 171.02.

<sup>1</sup>H NMR (400 MHz, MeOH-d<sub>4</sub>), (S)-2-amino-3-(1H-imidazol-4-yl)-N-phenethylpropanamide (**4c**):

PSK-14  
zg30 MeOD {C:\Bruker\TopSpin3.2\Iconnmr} PTLab 1

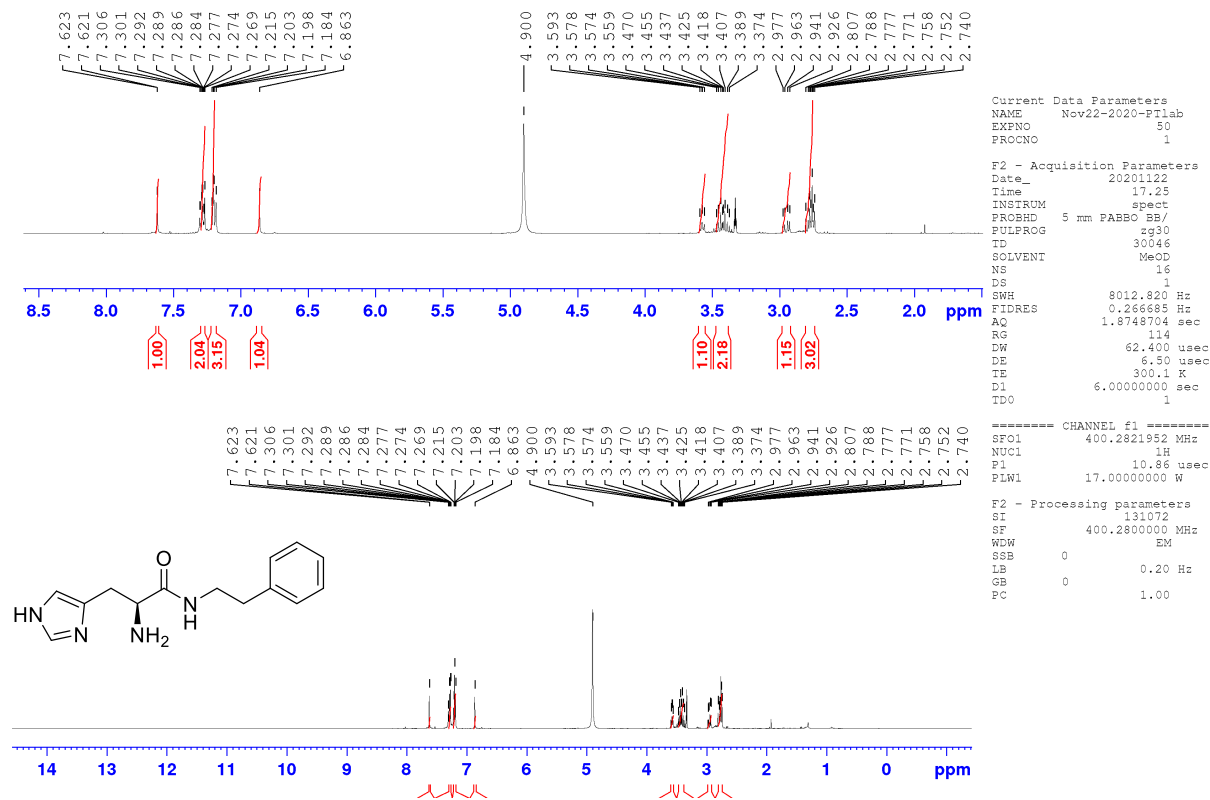

<sup>13</sup>C NMR (100 MHz, MeOH-d<sub>4</sub>), (S)-2-amino-3-(1H-imidazol-4-yl)-N-phenethylpropanamide (**4c**):

PSK-14 Carbon  
zgpg30 MeOD {C:\Bruker\TopSpin3.2\Iconnmr} PTLab 8

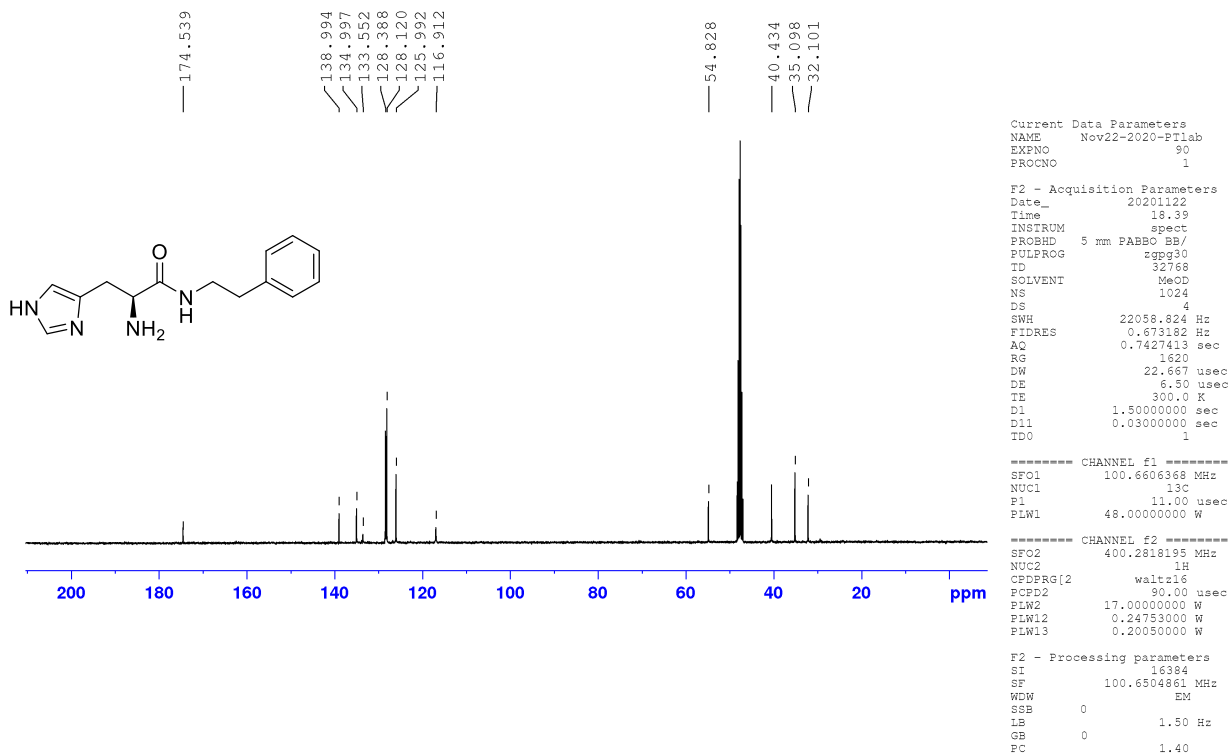

<sup>1</sup>H NMR (400 MHz, MeOH-d<sub>4</sub>), (R)-2-amino-3-(1H-imidazol-4-yl)-N-phenethylpropanamide (**4d**):

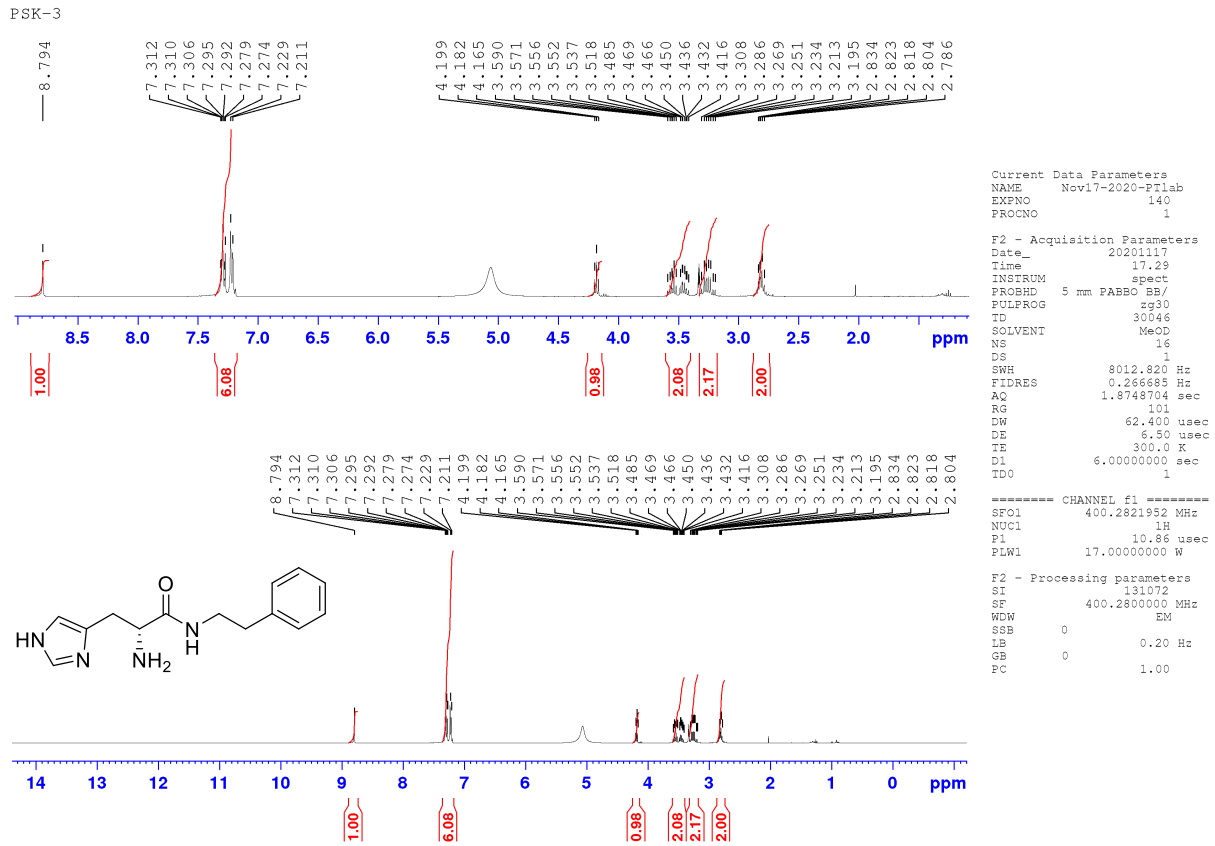

<sup>13</sup>C NMR (100 MHz, MeOH-d<sub>4</sub>), (R)-2-amino-3-(1H-imidazol-4-yl)-N-phenethylpropanamide (**4d**):

PSK-3 Carbon  
zgpg30 MeOD {C:\Bruker\TopSpin3.2\Iconnmr} FTlab 11

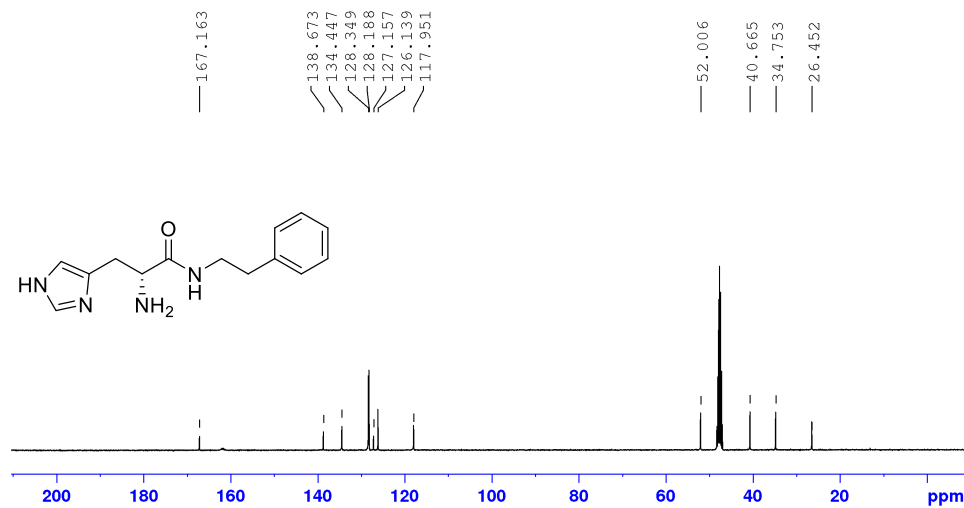

Current Data Parameters  
NAME Nov17-2020-FTlab  
EXPNO 170  
PROCNO 1

F2 - Acquisition Parameters  
Date\_ 20201117  
Time 19.43  
INSTRUM spect  
PROBHD 5 mm PABBO BB/  
PULPROG zgpg30  
TD 32768  
SOLVENT MeOD  
NS 1024  
DS 4  
SWH 22058.824 Hz  
FIDRES 0.673182 Hz  
AQ 0.7427413 sec  
RG 1620  
DW 22.667 usec  
DE 6.50 usec  
TE 300.1 K  
D1 1.50000000 sec  
D11 0.03000000 sec  
TD0 1

----- CHANNEL f1 -----  
SFO1 100.6606366 MHz  
NUC1 13C  
P1 11.00 usec  
PLW1 48.00000000 W

----- CHANNEL f2 -----  
SFO2 400.2818195 MHz  
NUC2 1H  
CPDPRG[2] waltz16  
PCPD2 30.00 usec  
PLW2 17.00000000 W  
PLW12 0.24753000 W  
PLW13 0.20050000 W

F2 - Processing parameters  
SI 16384  
SF 100.6504861 MHz  
WDW EM  
SSB 0  
LB 1.50 Hz  
GB 0  
PC 1.40



<sup>1</sup>H NMR (400 MHz, MeOH-d<sub>4</sub>), (S)-2-amino-3-(1H-imidazol-4-yl)-N-(4-methoxyphenethyl)propanamide (**4e**):

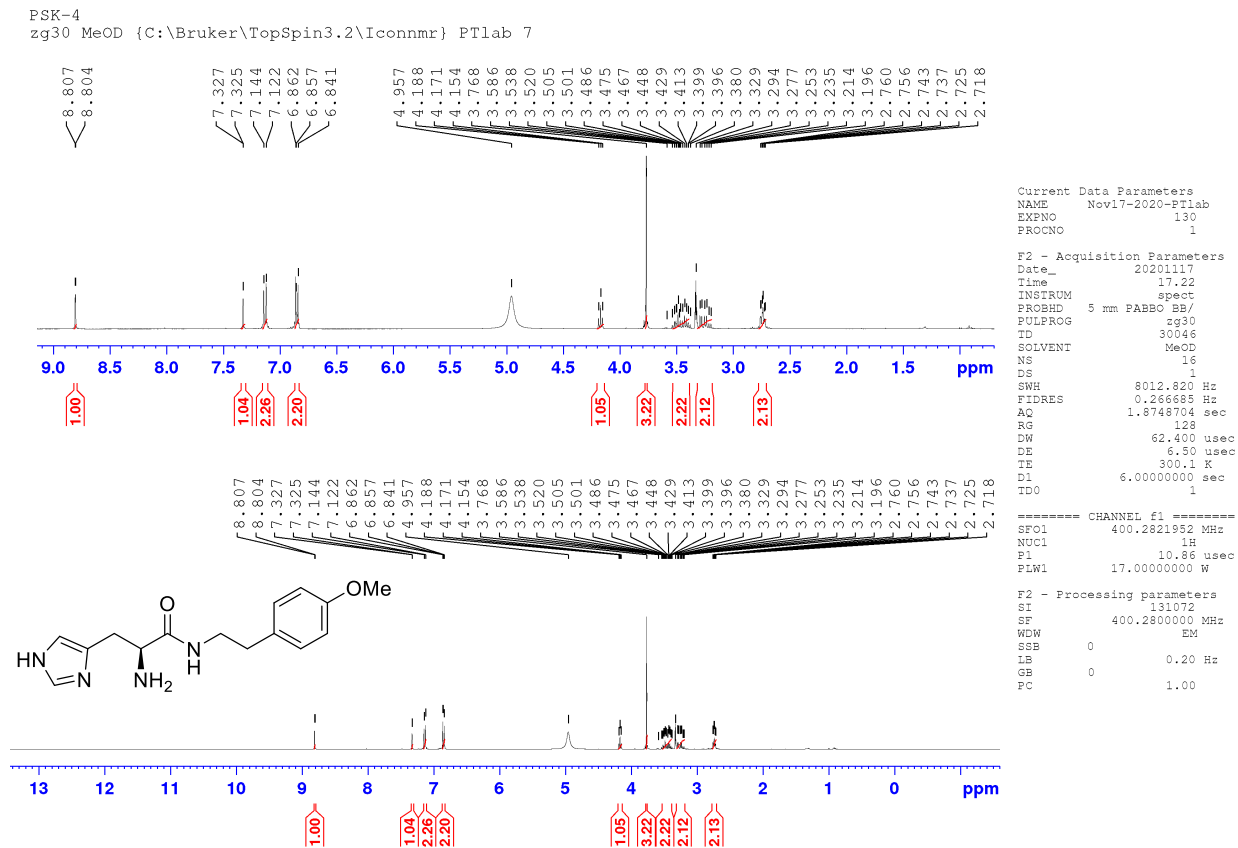

<sup>13</sup>C NMR (100 MHz, MeOH-d<sub>4</sub>), (S)-2-amino-3-(1H-imidazol-4-yl)-N-(4-methoxyphenethyl)propanamide (**4e**):

PSK-4 Carbon  
zgpg30 MeOD {C:\Bruker\TopSpin3.2\Iconnmr} PTLab 10

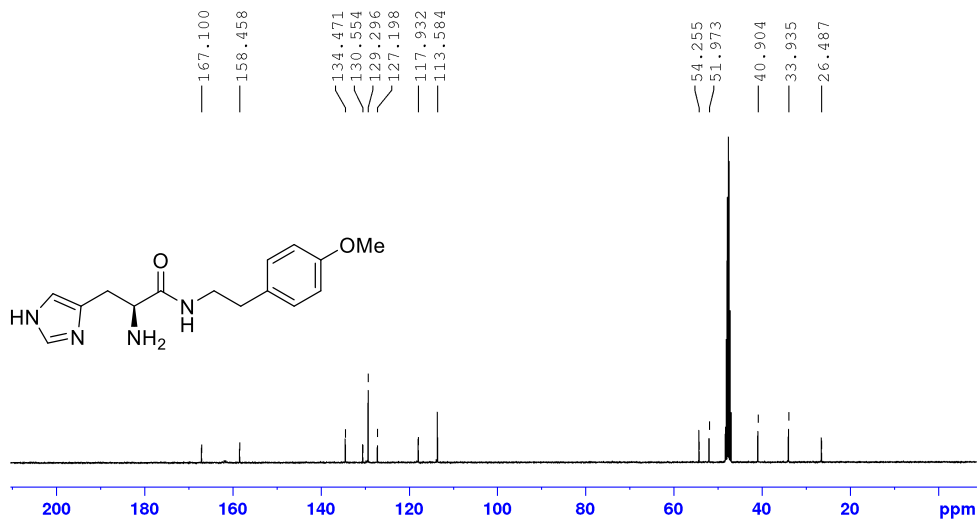

```

Current Data Parameters
NAME      Nov17-2020-PTLab
EXPNO    160
PROCNO   1

F2 - Acquisition Parameters
Date_    20201117
Time     18.58
INSTRUM  spect
PROBHD   5 mm PABBO BB/
PULPROG  zgpg30
TD       32768
SOLVENT  MeOD
NS       1024
DS       4
SWH      22058.824 Hz
FIDRES   0.873182 Hz
AQ       0.7427413 sec
RG       1620
DW       22.667 usec
DE       6.50 usec
TE       300.0 K
D1       1.50000000 sec
D11      0.03000000 sec
TDO      1

----- CHANNEL f1 -----
SFO1    100.6606368 MHz
NUC1     13C
P1       11.00 usec
PLW1     48.00000000 W

----- CHANNEL f2 -----
SFO2    400.2818195 MHz
NUC2     1H
CPDPRG2  waltz16
PCPD2    90.00 usec
PLW2     17.00000000 W
PLW12    0.24753000 W
PLW13    0.20050000 W

F2 - Processing parameters
SI       16384
SF       100.6504861 MHz
WDW      EM
SSB      0
LB       1.50 Hz
GB       0
PC       1.40
    
```

<sup>1</sup>H NMR (400 MHz, MeOH-d<sub>4</sub>), (R)-2-amino-3-(1H-imidazol-4-yl)-N-(4-methoxyphenethyl)propanamide (**4f**):

SR 69-1 d  
zg30 MeOD {C:\Bruker\TopSpin3.2\Iconnmr} PTLab 14

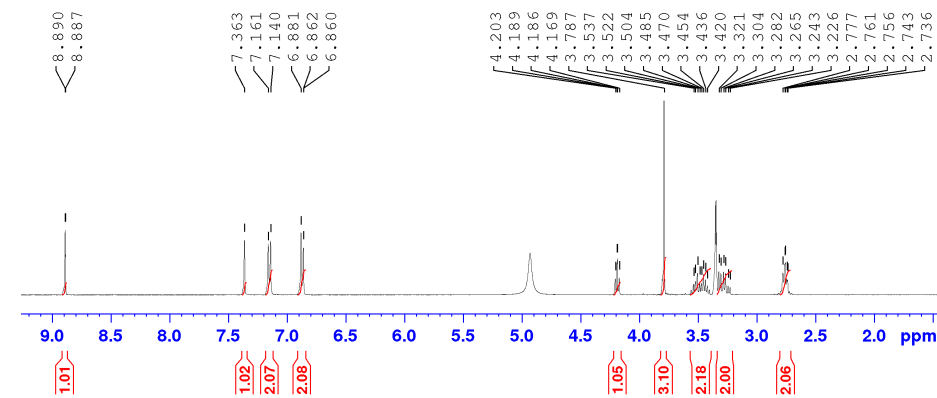

Current Data Parameters  
NAME Nov18-2020-PTLab  
EXPNO 160  
PROCNO 1

F2 - Acquisition Parameters  
Date\_ 20201118  
Time 19.34  
INSTRUM spect  
PROBHD 5 mm PABBO BB/  
PULPROG zg30  
TD 30048  
SOLVENT MeOD  
NS 16  
DS 1  
SWH 8012.820 Hz  
FIDRES 0.266895 Hz  
AQ 1.6748704 sec  
RG 256  
DW 62.400 usec  
DE 6.50 usec  
TE 300.0 K  
D1 6.00000000 sec  
TD0 1

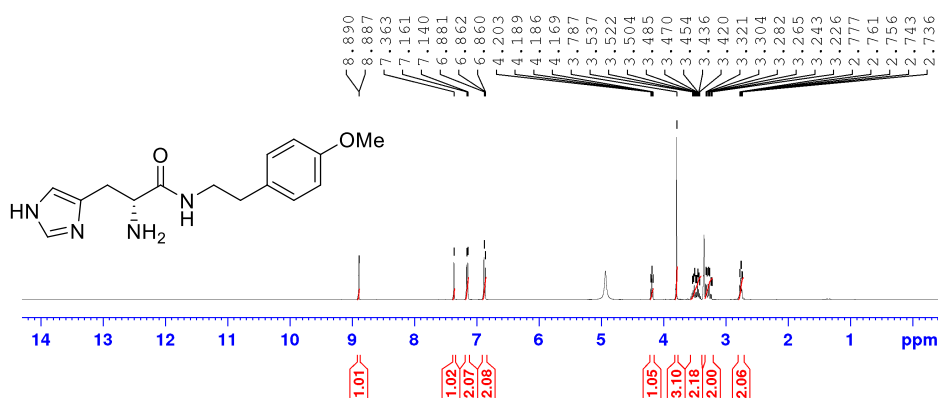

==== CHANNEL f1 =====  
SFO1 400.2821952 MHz  
NUC1 1H  
P1 10.86 usec  
PLW1 17.00000000 W

F2 - Processing parameters  
SI 131072  
SF 400.2793628 MHz  
WDW EM  
SSB 0  
LB 0.20 Hz  
GB 0  
PC 1.00

<sup>13</sup>C NMR (100 MHz, MeOH-d<sub>4</sub>), (R)-2-amino-3-(1H-imidazol-4-yl)-N-(4-methoxyphenethyl)propanamide (**4f**):

SR 69-1 d 13C  
C13CPD MeOD {C:\Bruker\TopSpin3.2\Iconnmr} PTLab 14

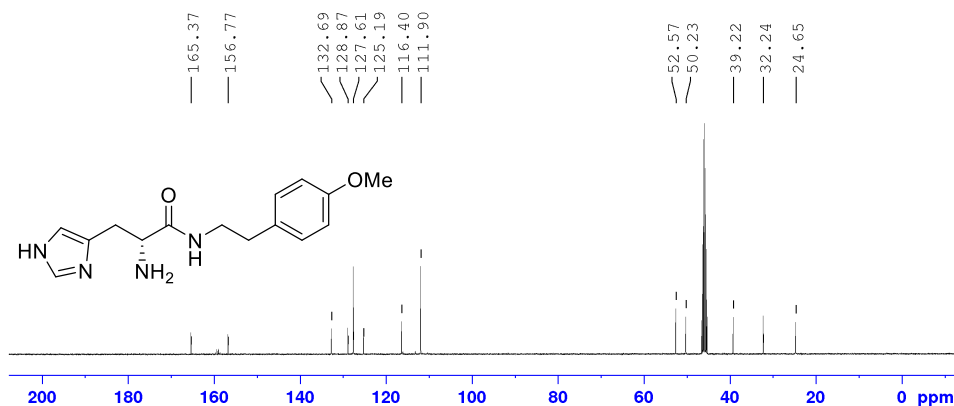

Current Data Parameters  
NAME Nov18-2020-PTLab  
EXPNO 170  
PROCNO 1

F2 - Acquisition Parameters  
Date\_ 20201118  
Time 20.20  
INSTRUM spect  
PROBHD 5 mm PABBO BB/  
PULPROG zgpg30  
TD 65536  
SOLVENT MeOD  
NS 512  
DS 4  
SWH 24038.461 Hz  
FIDRES 0.366798 Hz  
AQ 1.3631488 sec  
RG 2050  
DW 20.800 usec  
DE 6.50 usec  
TE 300.0 K  
D1 2.00000000 sec  
D11 0.03000000 sec  
TD0 1

----- CHANNEL f1 -----  
SFO1 100.6605506 MHz  
NUC1 13C  
P1 11.00 usec  
PLW1 48.00000000 W

----- CHANNEL f2 -----  
SFO2 400.2816011 MHz  
NUC2 1H  
CPDPRG[2] waltz16  
PCPD2 90.00 usec  
PLW2 17.00000000 W  
PLW12 0.24753000 W  
PLW13 0.20050000 W

F2 - Processing parameters  
SI 32768  
SF 100.6504861 MHz  
WDW EM  
SSB 0  
LB 1.00 Hz  
GB 0  
PC 1.40

<sup>1</sup>H NMR (400 MHz, MeOH-d<sub>4</sub>), (S)-2-amino-3-(1H-imidazol-4-yl)-N-(2-methoxyphenethyl)propanamide (**4g**):

SR 11-2 d  
zg30 MeOD {C:\Bruker\TopSpin3.2\Iconnmr} PTLab 9

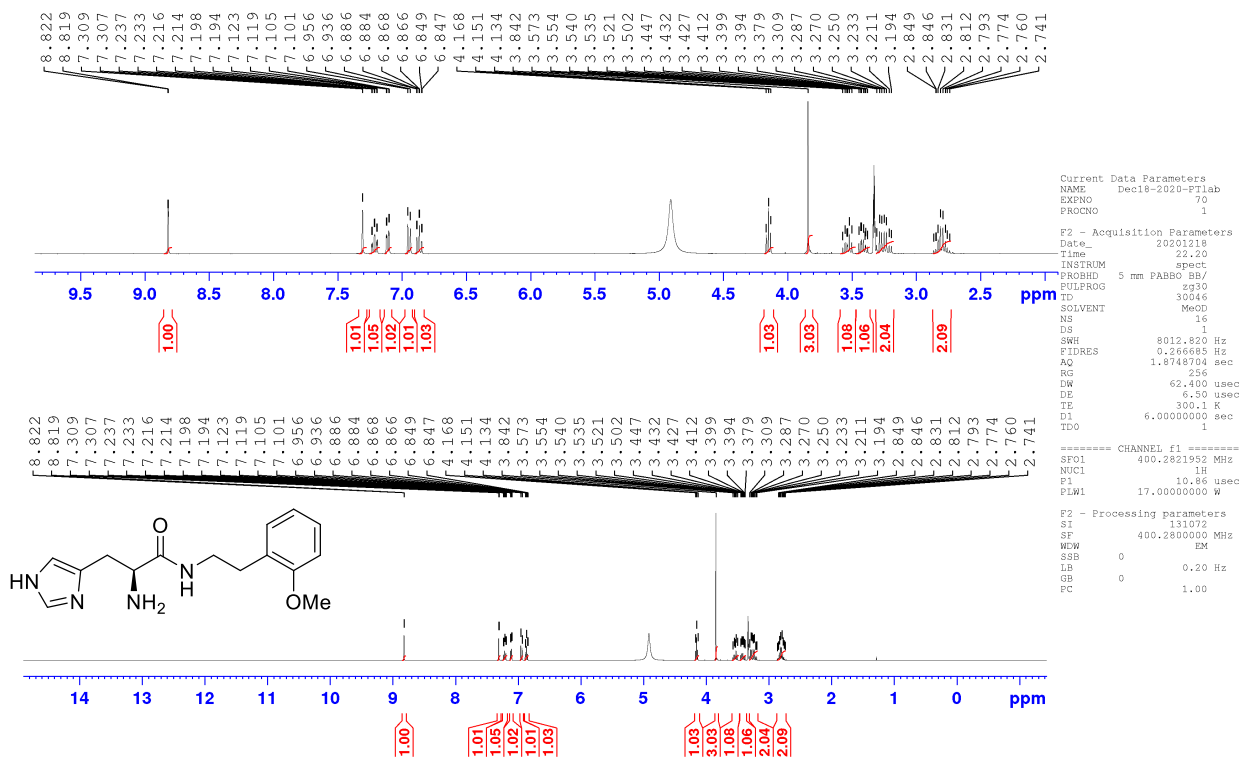

<sup>13</sup>C NMR (100 MHz, MeOH-d<sub>4</sub>), (S)-2-amino-3-(1*H*-imidazol-4-yl)-*N*-(2-methoxyphenethyl)propanamide (**4g**):

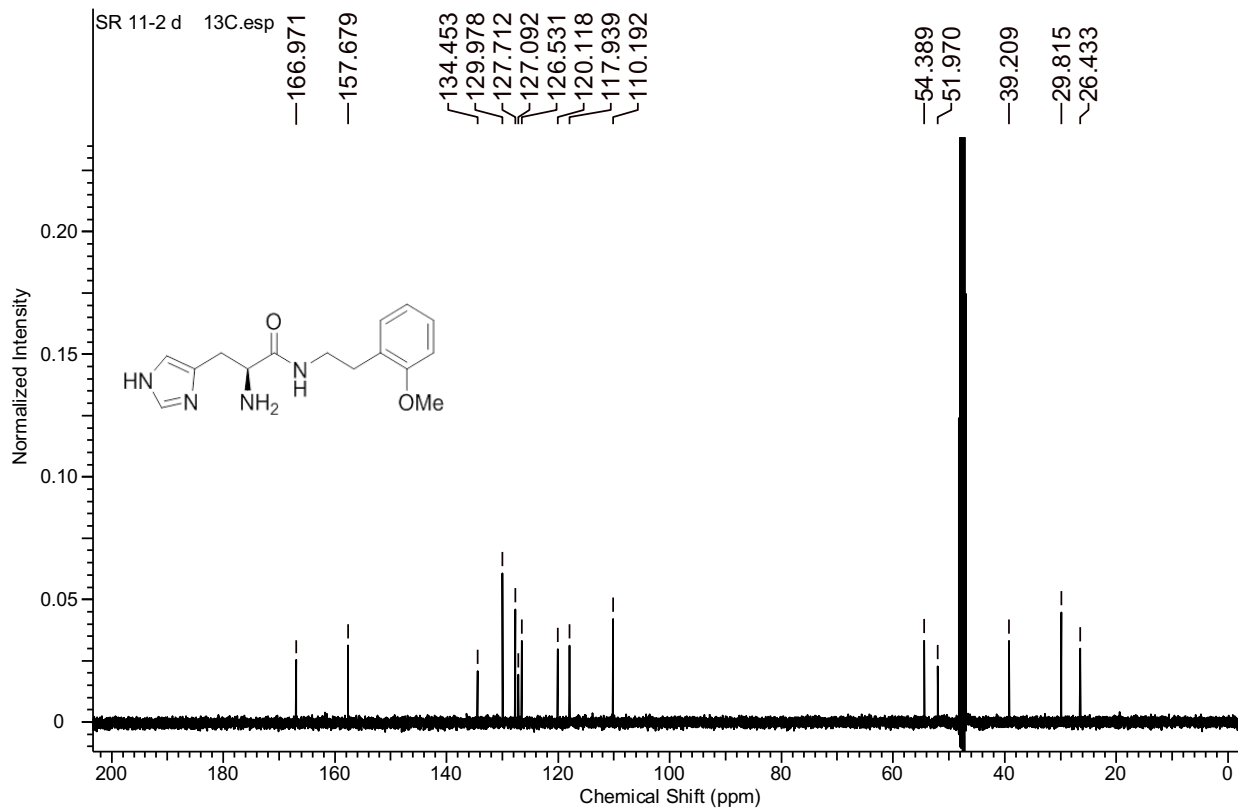

<sup>1</sup>H NMR (400 MHz, MeOH-d<sub>4</sub>), (R)-2-amino-3-(1H-imidazol-4-yl)-N-(2-methoxyphenethyl)propanamide (**4h**):

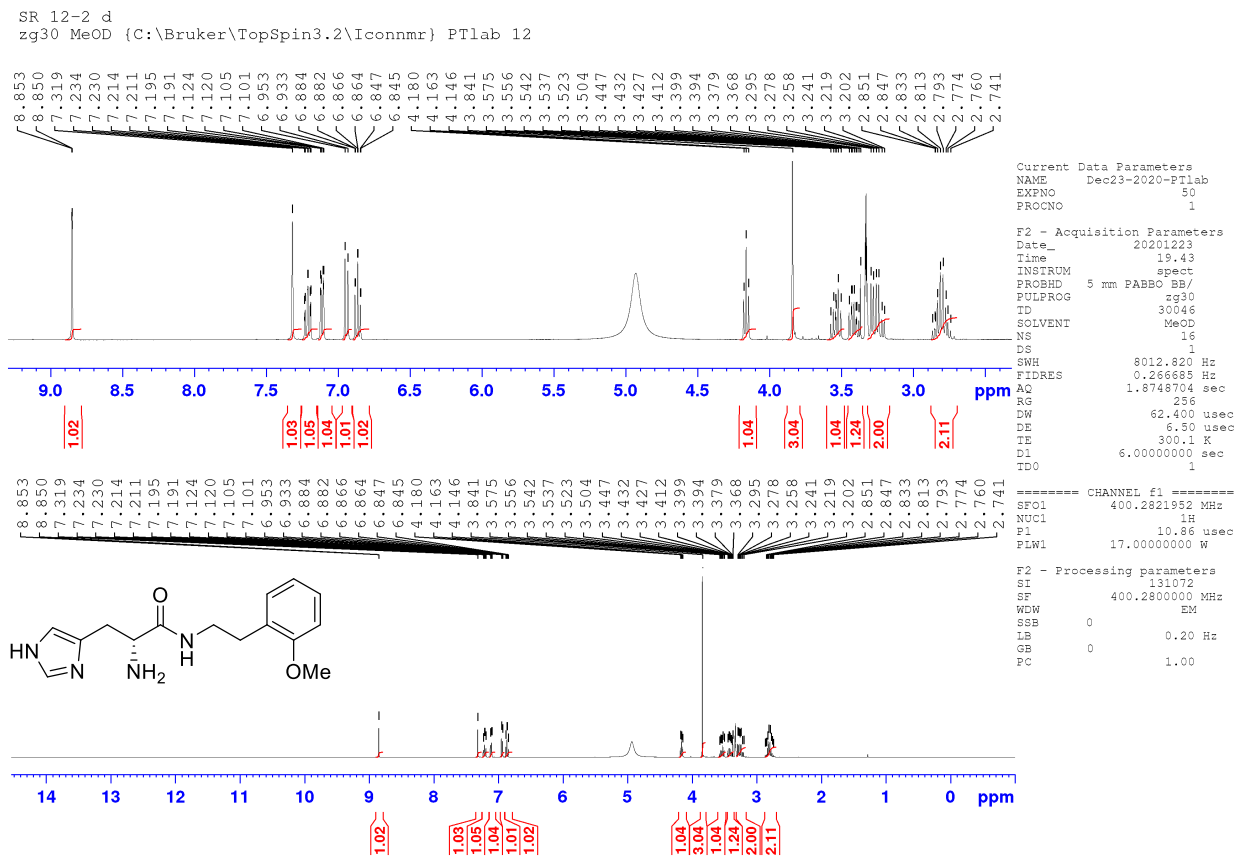

<sup>13</sup>C NMR (100 MHz, MeOH-d<sub>4</sub>), (R)-2-amino-3-(1H-imidazol-4-yl)-N-(2-methoxyphenethyl)propanamide (**4h**):

SR 12-2 d 13C  
C13CPD MeOD {C:\Bruker\TopSpin3.2\Iconnmr} PTLab 12

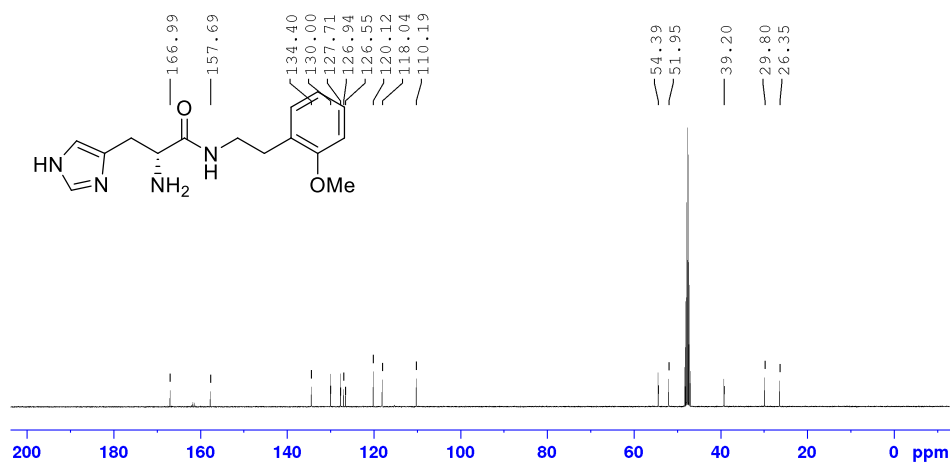

Current Data Parameters  
NAME Dec23-2020-PTLab  
EXPNO 60  
PROCNO 1

F2 - Acquisition Parameters  
Date\_ 20201223  
Time 20.24  
INSTRUM spect  
PROBHD 5 mm PABBO BB/  
PULPROG zgpg30  
ID 65536  
SOLVENT MeOD  
NS 512  
DS 4  
SWH 24038.461 Hz  
FIDRES 0.366798 Hz  
AQ 1.3631488 sec  
RG 2050  
DW 20.800 usec  
DE 6.50 usec  
TE 300.0 K  
D1 2.0000000 sec  
D11 0.0300000 sec  
TD 1

===== CHANNEL f1 =====  
SFO1 100.6605506 MHz  
NUC1 13C  
P1 11.00 usec  
PLW1 48.0000000 W

===== CHANNEL f2 =====  
SFO2 400.2816011 MHz  
NUC2 1H  
CPDPRG2 waltz16  
PCPD2 90.00 usec  
PLW2 17.0000000 W  
PLW12 0.24753000 W  
PLW13 0.20050000 W

F2 - Processing parameters  
SI 32768  
SF 100.6504861 MHz  
WDW EM  
SSB 0  
LB 1.00 Hz  
GB 0  
PC 1.40



<sup>1</sup>H NMR (400 MHz, MeOH-d<sub>4</sub>), (S)-2-amino-3-(1H-imidazol-4-yl)-N-(3-methoxyphenethyl)propanamide (**4i**):

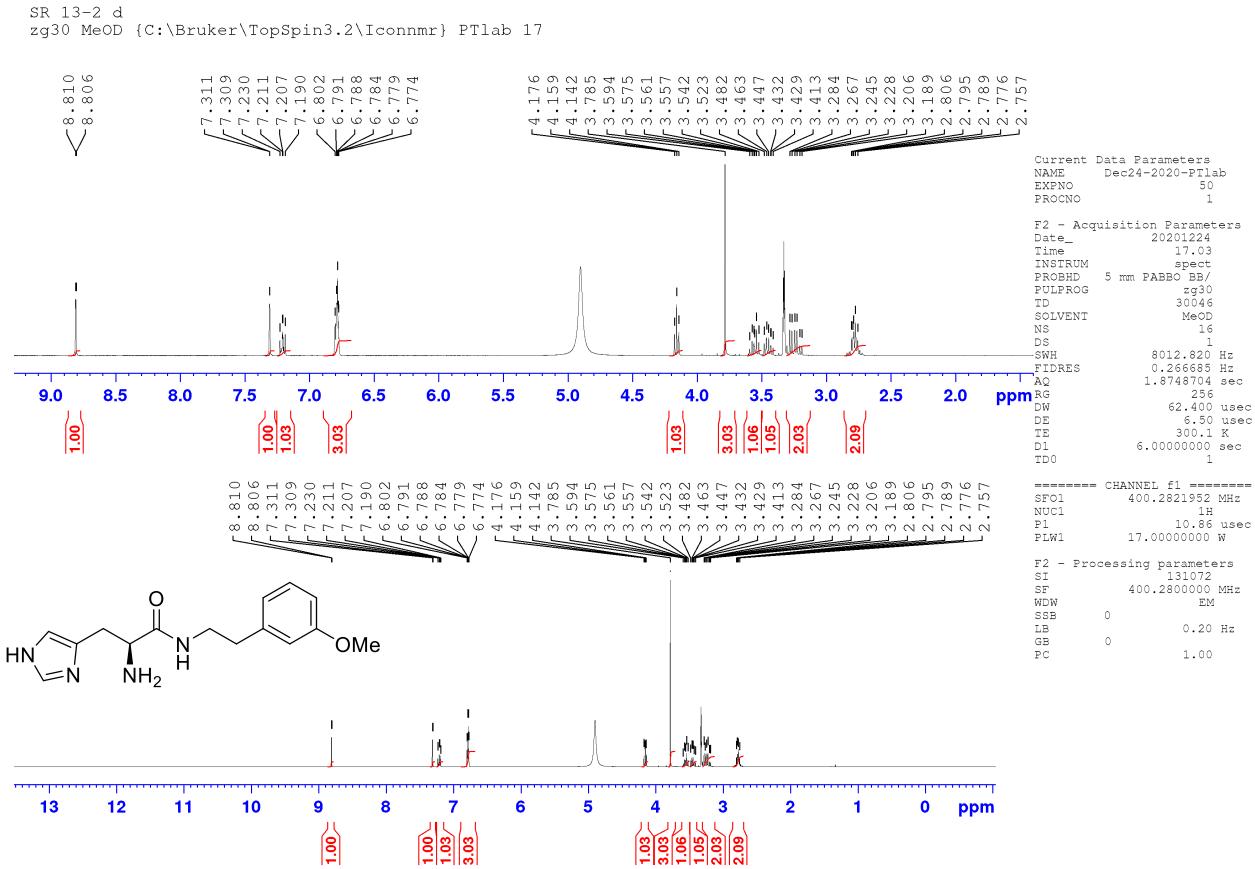

<sup>13</sup>C NMR (100 MHz, MeOH-d<sub>4</sub>), (S)-2-amino-3-(1*H*-imidazol-4-yl)-*N*-(3-methoxyphenethyl)propanamide (**4i**):

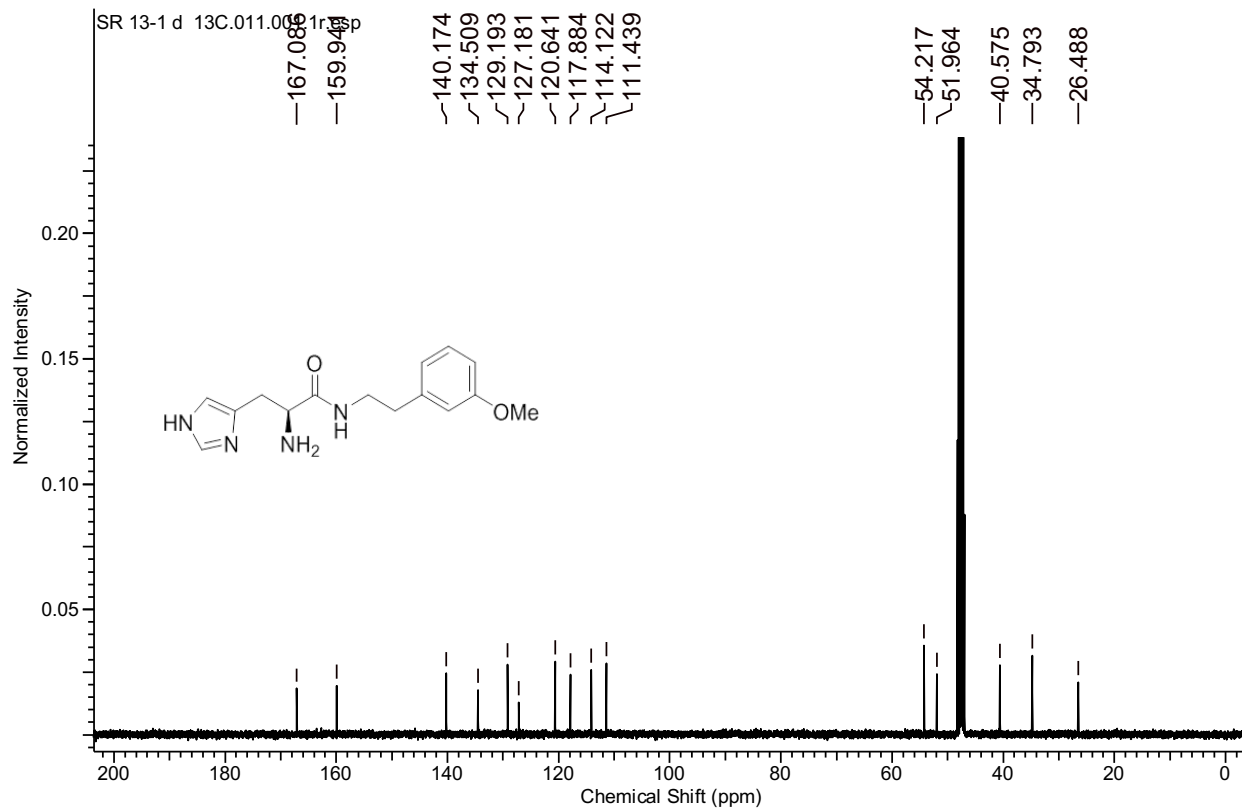

<sup>1</sup>H NMR (400 MHz, MeOH-d<sub>4</sub>), (*R*)-2-amino-3-(1*H*-imidazol-4-yl)-*N*-(3-methoxyphenethyl)propanamide (**4j**):

SR 15-2 d  
zg30 MeOD {C:\Bruker\TopSpin3.2\Iconnmr} PTLab 16

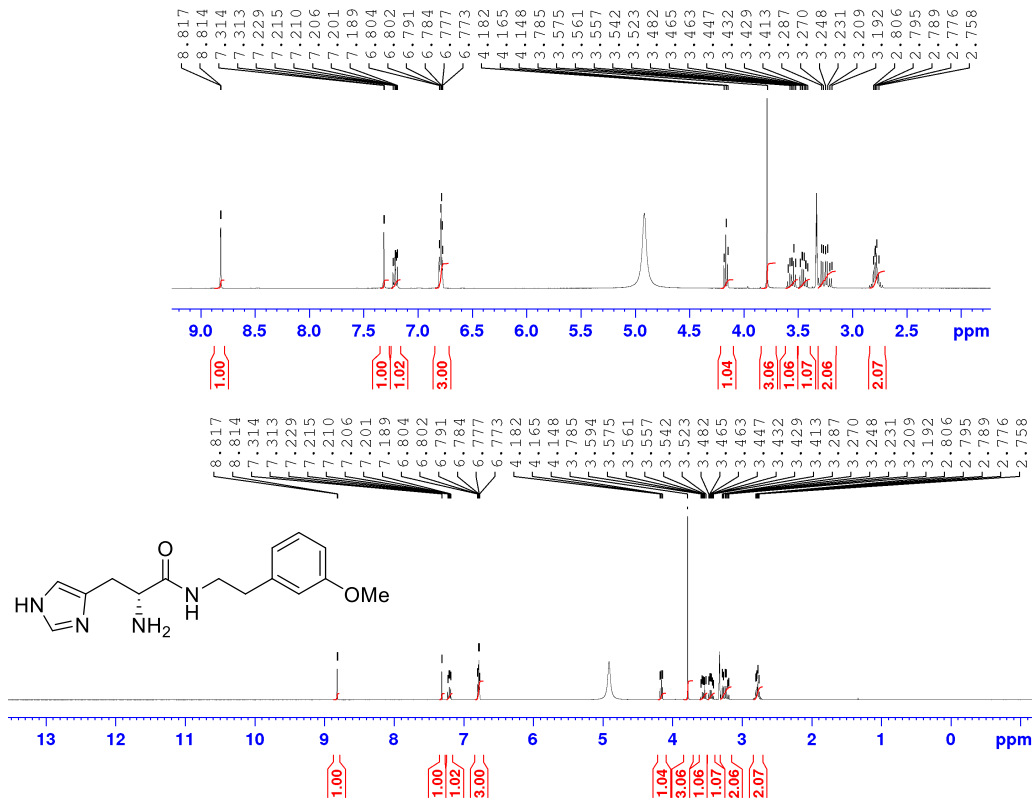

Current Data Parameters  
NAME Dec24-2020-PTlab  
EXPNO 40  
PROCNO 1

F2 - Acquisition Parameters  
Date\_ 20201224  
Time 15:55  
INSTRUM spect  
PROBHD 5 mm PABBO BB/  
PULPROG zg30  
TD 30046  
SOLVENT MeOD  
NS 16  
DS 1  
SWH 8012.820 Hz  
FIDRES 0.266685 Hz  
AQ 1.8748704 sec  
RG 256  
DW 62.400 usec  
DE 6.50 usec  
TE 300.1 K  
D1 6.00000000 sec  
TD0 1

----- CHANNEL f1 -----  
SFO1 400.2821952 MHz  
NUC1 1H  
P1 10.86 usec  
FLM1 17.00000000 W

F2 - Processing Parameters  
SI 131072  
SF 400.2800000 MHz  
WDW EM  
SSB 0  
LB 0.20 Hz  
GB 0  
PC 1.00

<sup>13</sup>C NMR (100 MHz, MeOH-d<sub>4</sub>), (*R*)-2-amino-3-(1*H*-imidazol-4-yl)-*N*-(3-methoxyphenethyl)propanamide (**4j**):

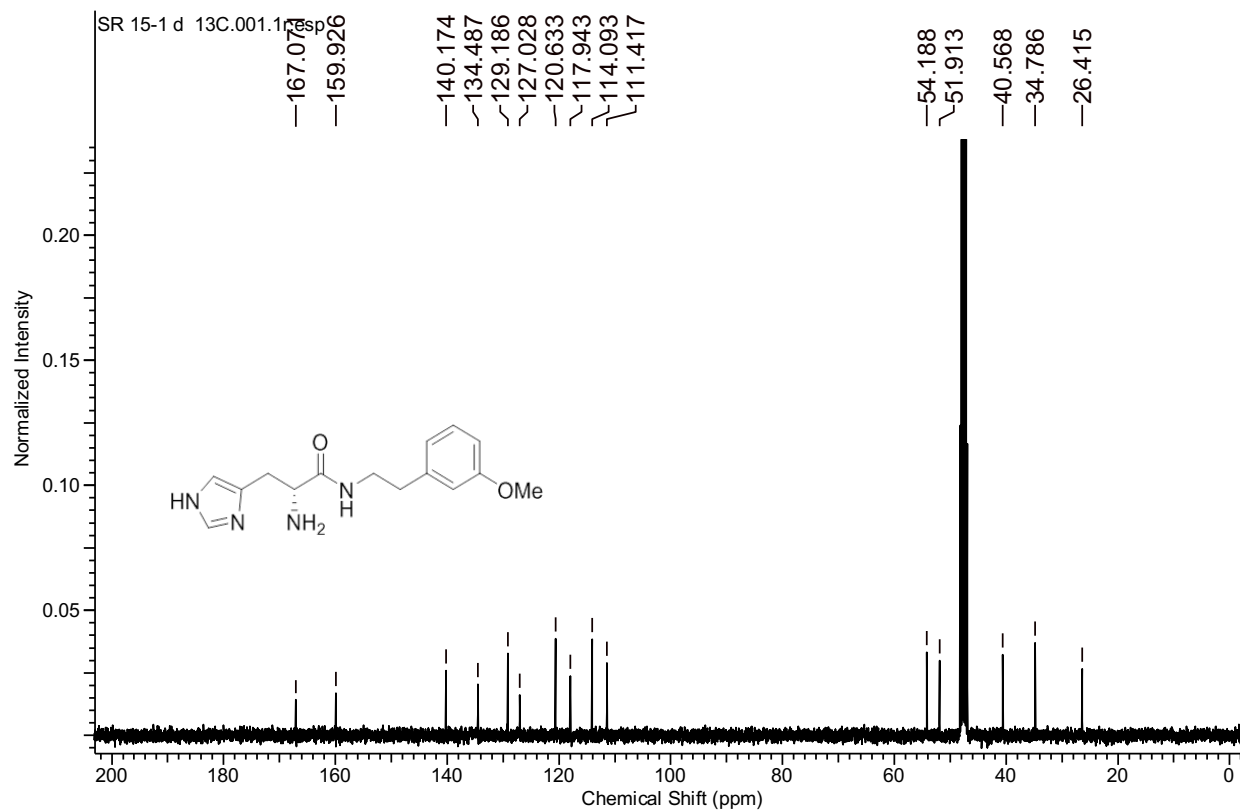

<sup>1</sup>H NMR (400 MHz, MeOH-d<sub>4</sub>), (S)-2-amino-3-(1H-imidazol-4-yl)-N-(4 (trifluoromethyl)phenethyl)propanamide

(4k):

PSK-1-d  
zg30 MeOD (C:\Bruker\TopSpin3.2\Iconnmr) PTLab 7

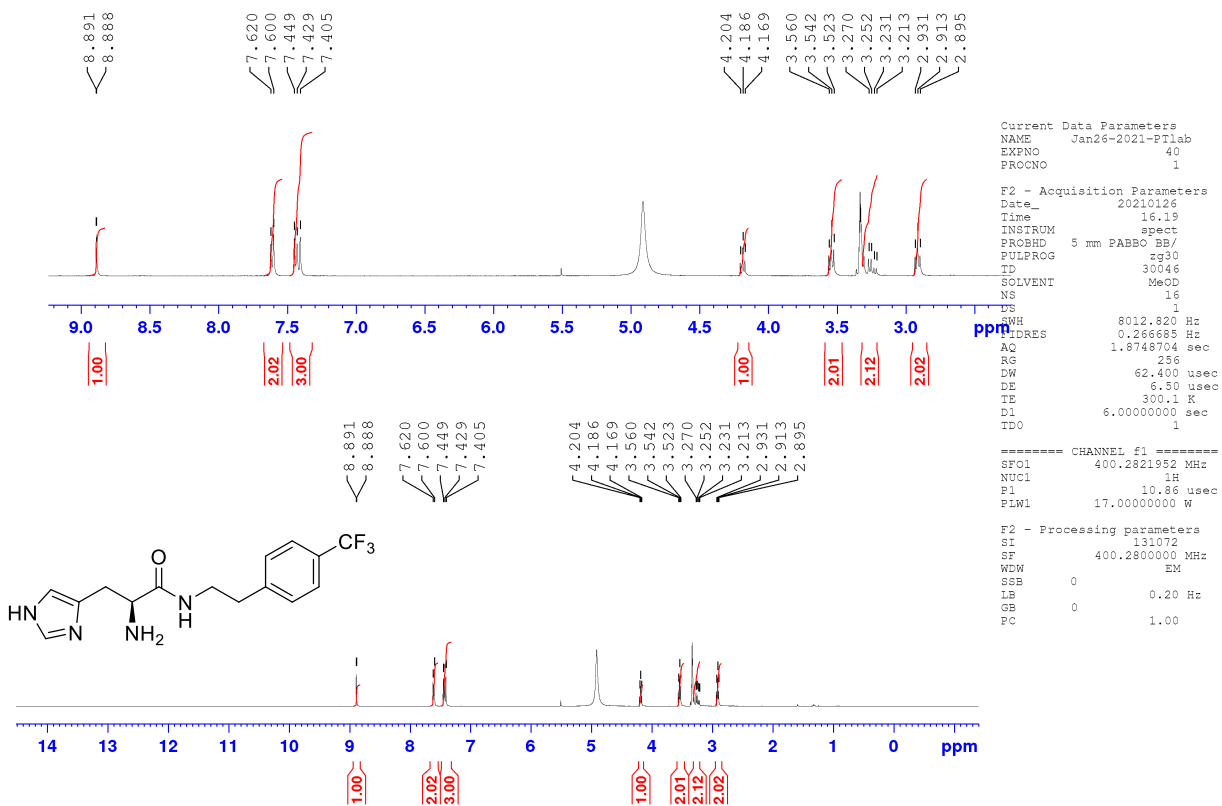

<sup>13</sup>C NMR (100 MHz, MeOH-d<sub>4</sub>), (S)-2-amino-3-(1H-imidazol-4-yl)-N-(4-(trifluoromethyl)phenethyl)propanamide

(4k):

PSK-1-d carbon  
C13CPD MeOD {C:\Bruker\TopSpin3.2\Iconnmr} PTLab 7

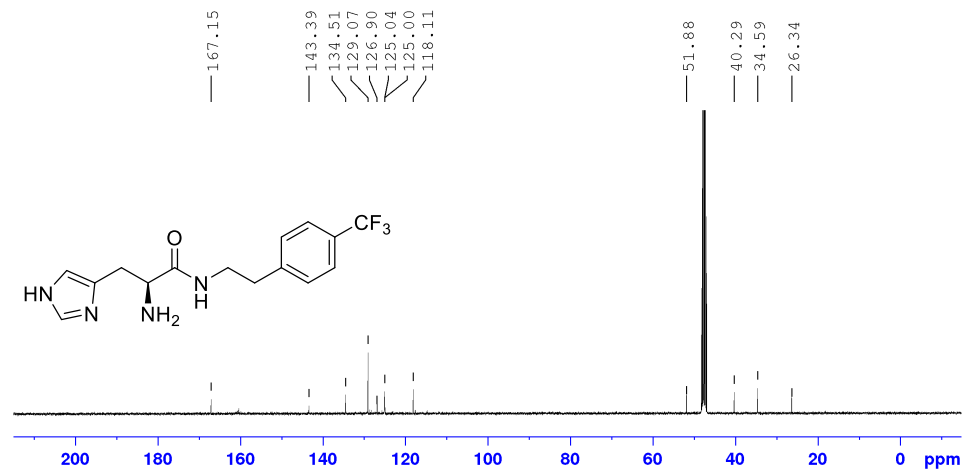

```
Current Data Parameters
NAME      Jan26-2021-PTLab
EXPNO    41
PROCNO   1

F2 - Acquisition Parameters
Date_    20210126
Time     17.12
INSTRUM  spect
PROBHD   5 mm PABBO BB/
PULPROG  zgpg30
TD       65536
SOLVENT  MeOD
NS       800
DS       4
SWH      24038.461 Hz
FIDRES   0.366798 Hz
AQ       1.3631488 sec
RG       2050
DW       20.800 usec
DE       6.50 usec
TE       300.0 K
D1       2.00000000 sec
D11      0.03000000 sec
TD0      1

===== CHANNEL f1 =====
SFO1    100.6605506 MHz
NUC1    13C
P1      11.00 usec
PLW1    48.00000000 W

===== CHANNEL f2 =====
SFO2    400.2816011 MHz
NUC2    1H
CPDPRG2 waltz16
PCPD2   90.00 usec
PLW2    17.00000000 W
PLW12   0.24753000 W
PLW13   0.20050000 W

F2 - Processing parameters
SI      32768
SF      100.6504861 MHz
WDW     EM
SBB     0
LB      1.00 Hz
GB      0
PC      1.40
```

<sup>1</sup>H NMR (400 MHz, DMSO-d<sub>6</sub>), (R)-2-amino-3-(1H-imidazol-4-yl)-N-(4-(trifluoromethyl)phenethyl)propanamide

(4):

PSK-2  
2g30 DMSO {C:\Bruker\TopSpin3.2\Iconnmr} PTLab 7

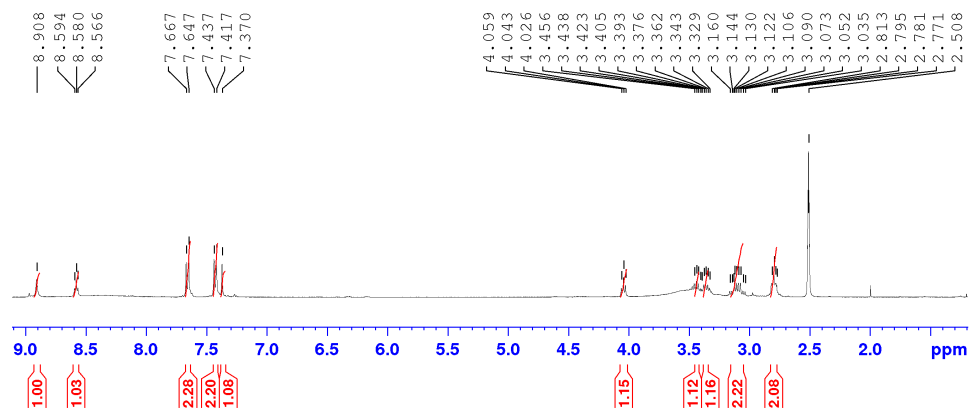

Current Data Parameters  
NAME Nov18-2020-PTlab  
EXPNO 130  
PROCNO 1

F2 - Acquisition Parameters  
Date\_ 20201118  
Time 16.34  
INSTRUM spect  
PROBHD 5 mm PABBO BB/  
PULPROG zg30  
ID 30046  
SOLVENT DMSO  
NS 16  
DS 1  
SWH 8012.820 Hz  
FIDRES 0.266685 Hz  
AQ 1.8748704 sec  
RG 236  
DW 62.400 usec  
DE 6.50 usec  
TE 300.2 K  
D1 6.00000000 sec  
TDO 1

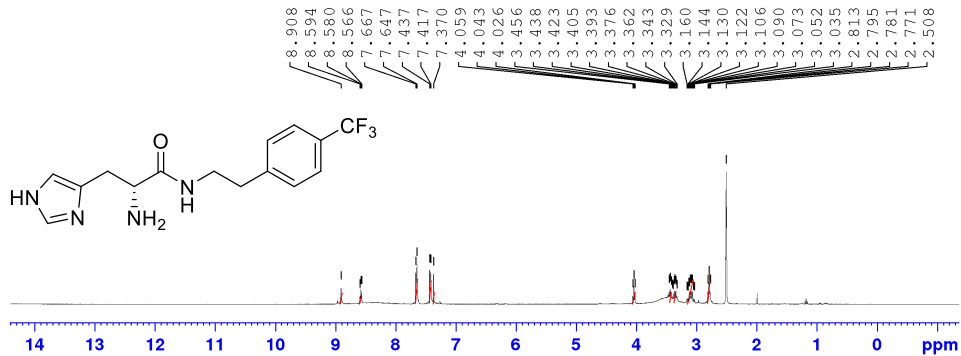

===== CHANNEL f1 =====  
SF01 400.2821952 MHz  
NUC1 1H  
P1 10.86 usec  
PLW1 17.00000000 W

F2 - Processing parameters  
SI 131072  
SF 400.2800000 MHz  
WDW EM  
SSB 0  
LB 0.20 Hz  
GB 0  
PC 1.00

<sup>13</sup>C NMR (100 MHz, DMSO-d<sub>6</sub>), (R)-2-amino-3-(1H-imidazol-4-yl)-N-(4-(trifluoromethyl)phenethyl)propanamide

(4I):

PSK-2 Carbon  
zgpg30 DMSO {C:\Bruker\TopSpin3.2\Iconnmr} PTLab 7

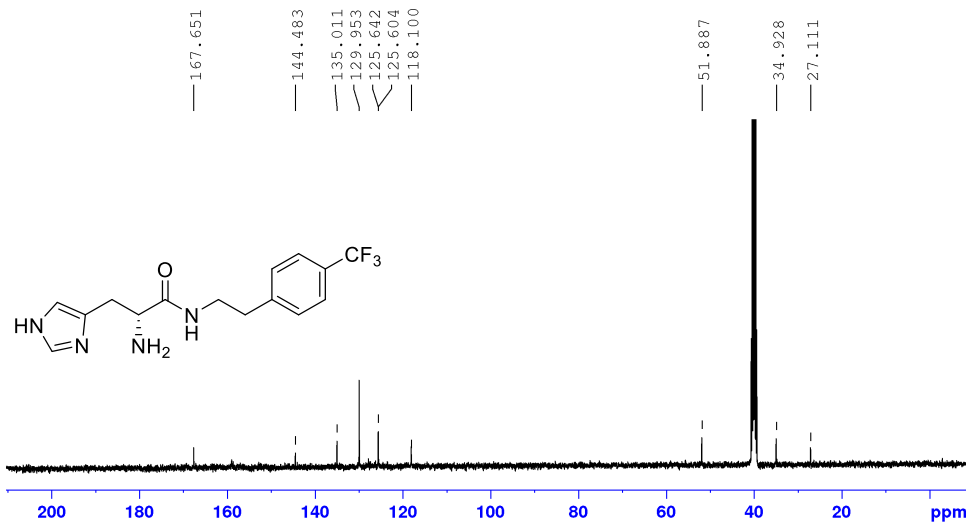

```
Current Data Parameters
NAME      Nov18-2020-PrLab
EXPNO    131
PROCNO   1

F2 - Acquisition Parameters
Date_    20201118
Time     17.24
INSTRUM  spect
PROBHD   5 mm PABBO BB/
PULPROG  zgpg30
TD       32768
SOLVENT  DMSO
NS       1024
DS       4
SWH      22058.824 Hz
FIDRES   0.673182 Hz
AQ       0.7427413 sec
RG       1520
DW       22.667 usec
DE       6.50 usec
TE       300.1 K
D1       1.50000000 sec
D11      0.03000000 sec
TDO      1

===== CHANNEL f1 =====
SFO1    100.6606368 MHz
NUC1     13C
P1      11.00 usec
PLW1    48.00000000 W

===== CHANNEL f2 =====
SFO2    400.2818195 MHz
NUC2     1H
CPDPRG2  waltz16
PCPD2    90.00 usec
PLW2    17.00000000 W
PLW12   0.24753000 W
PLW13   0.20050000 W

F2 - Processing parameters
SI       16384
SF       100.6504861 MHz
WDW      EM
SSB      0
LB       1.50 Hz
GB       0
PC       1.40
```



<sup>1</sup>H NMR (400 MHz, MeOH-d<sub>4</sub>), (S)-2-amino-N-(4-fluorophenethyl)-3-(1H-imidazol-4-yl)propanamide (**4m**):

KS-49-d  
zg30 MeOD {C:\Bruker\TopSpin3.2\Iconnmr} PTLab 2

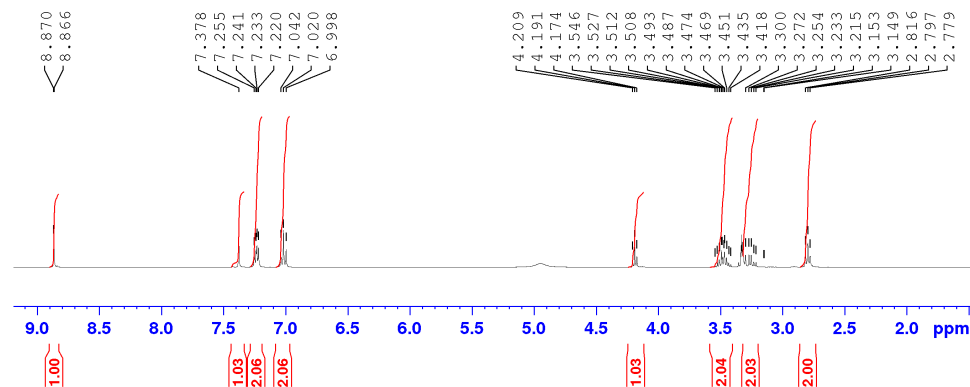

Current Data Parameters  
NAME Jan30-2021-PTLab  
EXPNO 60  
PROCNO 1

F2 - Acquisition Parameters  
Date\_ 20210130  
Time 13.52  
INSTRUM spect  
PROBHD 5 mm PABBO BB/  
PULPROG zg30  
TD 30046  
SOLVENT MeOD  
NS 16  
DS 1  
SWH 8012.820 Hz  
FIDRES 0.266665 Hz  
AQ 1.8748704 sec  
RG 256  
DW 62.400 usec  
DE 6.50 usec  
TE 300.0 K  
D1 6.00000000 sec  
TDO 1

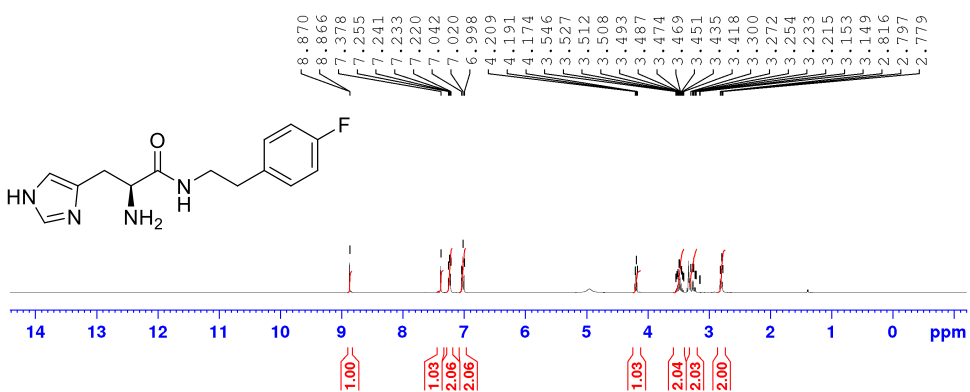

===== CHANNEL f1 =====  
SF01 400.2821952 MHz  
NUC1 1H  
P1 10.86 usec  
PLW1 17.00000000 W

F2 - Processing parameters  
SI 131072  
SF 400.2800000 MHz  
WDW EM  
SSB 0  
LB 0.20 Hz  
GB 0  
PC 1.00

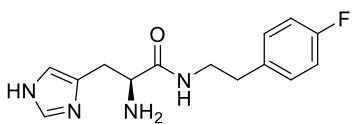

<sup>13</sup>C NMR (100 MHz, MeOH-d<sub>4</sub>), (S)-2-amino-N-(4-fluorophenethyl)-3-(1H-imidazol-4-yl)propanamide (**4m**):

KS-49-d repeat carbon  
 C13CPD MeOD {C:\Bruker\TopSpin3.2\Iconnmr} PTLab 2

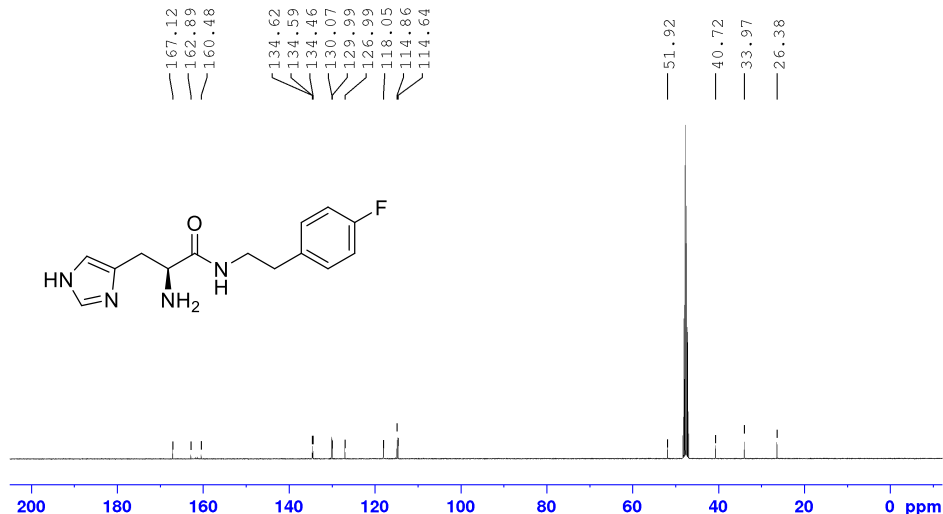

```

Current Data Parameters
NAME      Jan30-2021-PTLab
EXPNO     61
PROCNO    1

F2 - Acquisition Parameters
Date_     20210130
Time      14.44
INSTRUM   spect
PROBHD    5 mm PABBO BB/
PULPROG   zgpg30
TD         65536
SOLVENT   MeOD
NS         800
DS         4
SWH       24038.461 Hz
FIDRES    0.366798 Hz
AQ         1.3691488 sec
RG         2050
DW         20.800 usec
DE         6.50 usec
TE         300.0 K
D1         2.00000000 sec
D11        0.03000000 sec
TD0        1

===== CHANNEL f1 =====
SFO1      100.6605506 MHz
NUC1       13C
P1         11.00 usec
PLW1      48.00000000 W

===== CHANNEL f2 =====
SFO2      400.2816011 MHz
NUC2       1H
CPDPRG[2]  waltz16
PCPD2     90.00 usec
PLW2      17.00000000 W
PLWL2     0.24750000 W
PLWL3     0.20050000 W

F2 - Processing parameters
SI         32768
SF         100.6504861 MHz
WDW        EM
SSB        0
LB         1.00 Hz
GB         0
PC         1.40
  
```

<sup>1</sup>H NMR (400 MHz, MeOH-d<sub>4</sub>), (*R*)-2-amino-*N*-(4-fluorophenethyl)-3-(1*H*-imidazol-4-yl)propanamide (**4n**):

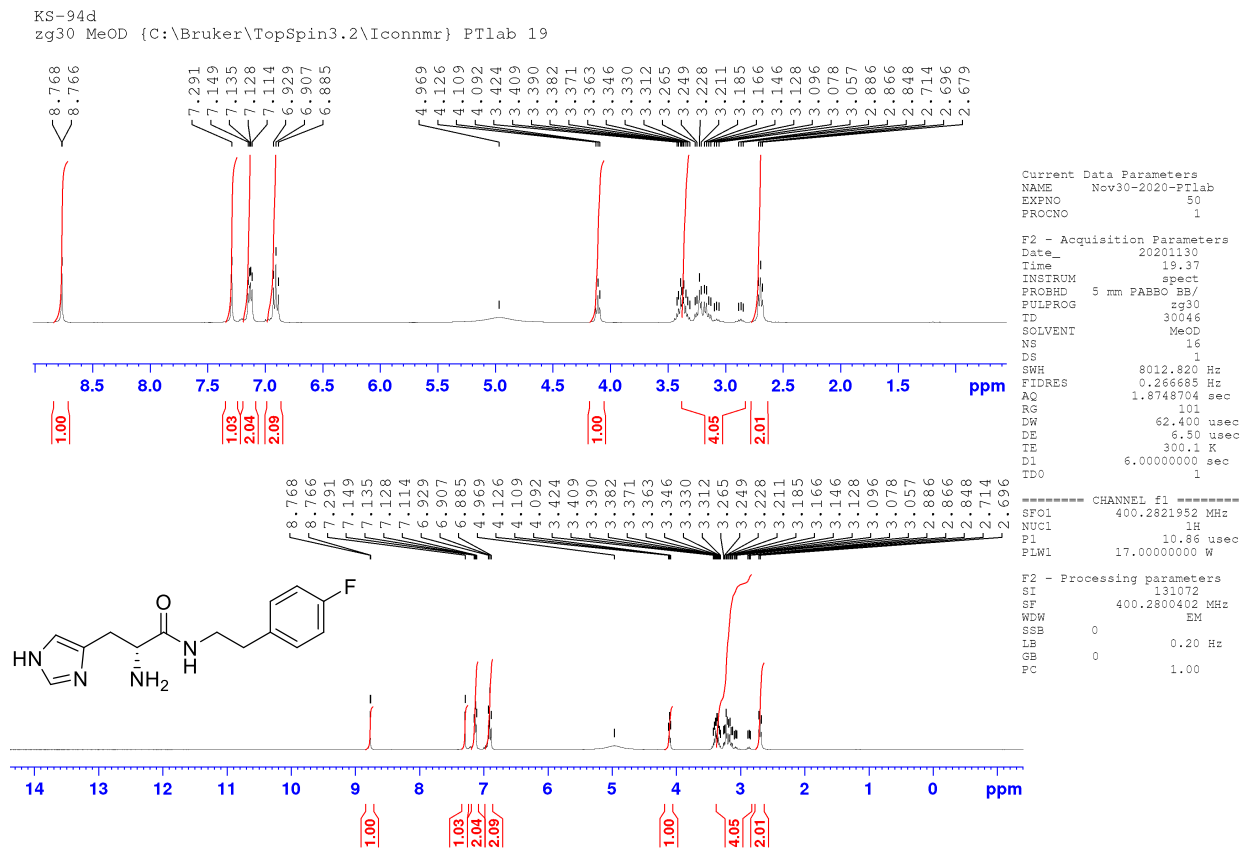

<sup>13</sup>C NMR (100 MHz, MeOH-d<sub>4</sub>), (R)-2-amino-N-(4-fluorophenethyl)-3-(1H-imidazol-4-yl)propanamide (**4n**):

KS-94-d carbon  
C13CPD MeOD {C:\Bruker\TopSpin3.2\Iconmr} PTLab 12

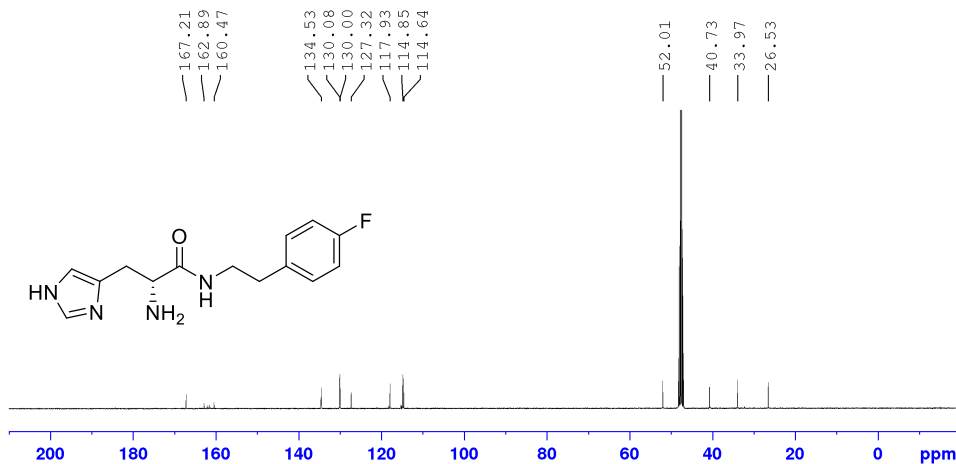

Current Data Parameters  
NAME Jan29-2021-PTLab  
EXPNO 111  
PROCNO 1

F2 - Acquisition Parameters  
Date\_ 20210129  
Time 18.10  
INSTRUM spect  
PROBHD 5 mm PABBO BB/  
PULPROG zgpg30  
TD 65536  
SOLVENT MeOD  
NS 800  
DS 4  
SWH 24038.461 Hz  
FIDRES 0.366798 Hz  
AQ 1.3631488 sec  
RG 2050  
DW 20.800 usec  
DE 6.50 usec  
TE 300.1 K  
D1 2.0000000 sec  
D11 0.0300000 sec  
TDO 1

----- CHANNEL f1 -----  
SFO1 100.6605506 MHz  
NUC1 13C  
P1 11.00 usec  
PLW1 48.0000000 W

----- CHANNEL f2 -----  
SFO2 400.2816011 MHz  
NUC2 1H  
CPDPRG2 waltz16  
PCPD2 90.00 usec  
PLW2 17.0000000 W  
PLW12 0.24753000 W  
PLW13 0.20050000 W

F2 - Processing parameters  
SI 32768  
SF 100.6504861 MHz  
WDW EM  
SSB 0  
LB 1.00 Hz  
GB 0  
PC 1.40

<sup>1</sup>H NMR (500 MHz, MeOH-d<sub>4</sub>), (S)-2-amino-3-(1H-imidazol-4-yl)-N-(4-nitrophenethyl)propanamide (**4o**):

SR 31-1 d

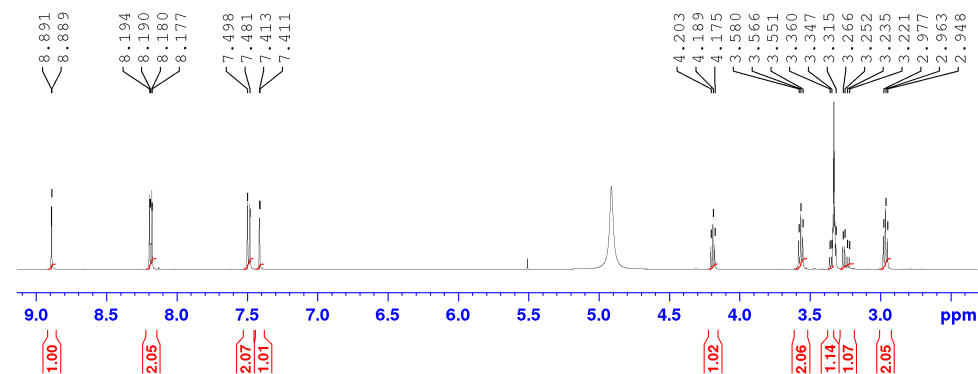

```

Current Data Parameters
NAME      Nov14-2019-PIlab
EXPNO    20
PROCNO    1

F2 - Acquisition Parameters
Date_    20191114
Time     11.26
INSTRUM  spect
PROBHD   5 mm PABBO BB/
PULPROG  zg30
TD        65536
SOLVENT  MeOD
NS        16
DS        2
SWH       9973.404 Hz
FIDRES    0.152162 Hz
AQ        3.285382 sec
RG        152.34
DE        50.133 usec
TE        298.0 K
D1        6.0000000 sec
TD0       1

===== CHANNEL f1 =====
SF01     499.2621482 MHz
NUC1      1H
P1        10.00 usec
PLW1     17.00000000 W

F2 - Processing parameters
SI        65536
SF        499.2590651 MHz
WDW       EM
SSB       0
LB        0.30 Hz
GB        0
PC        1.00
    
```

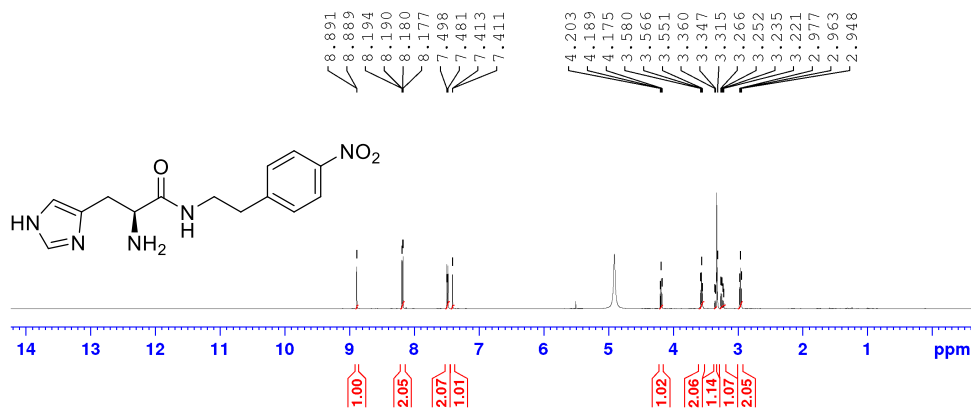

<sup>13</sup>C NMR (126 MHz, MeOH-d<sub>4</sub>), (S)-2-amino-3-(1H-imidazol-4-yl)-N-(4-nitrophenethyl)propanamide (**4o**):

SR 31-1 d 13C

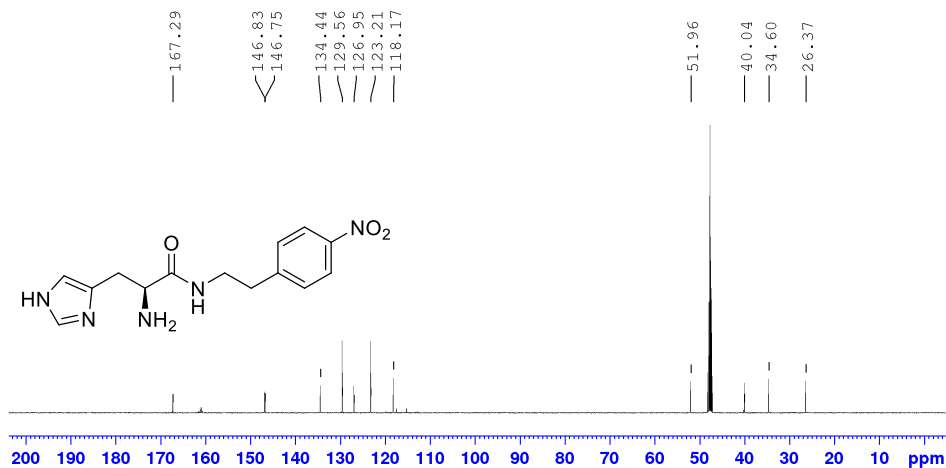

Current Data Parameters  
NAME Nov15-2019-PTlab  
EXPNO 40  
PROCNO 1

F2 - Acquisition Parameters  
Date\_ 20191115  
Time 20.25  
INSTRUM spect  
PROBHD 5 mm PABBO BB/  
PULPROG zgpg30  
TD 65536  
SOLVENT MeOD  
NS 512  
DS 4  
SWH 29761.904 Hz  
FIDRES 0.454131 Hz  
AQ 1.1010048 sec  
RG 191.52  
DW 16.800 usec  
DE 10.00 usec  
TE 300.0 K  
D1 2.00000000 sec  
D11 0.03000000 sec  
TDO 1

===== CHANNEL f1 =====  
SFO1 125.5513451 MHz  
NUC1 13C  
P1 10.00 usec  
PLW1 71.00000000 W

===== CHANNEL f2 =====  
SFO2 499.2610621 MHz  
NUC2 1H  
CPDPRG[2] waltz16  
PCPD2 80.00 usec  
PLW2 17.00000000 W  
PLW12 0.26563001 W  
PLW13 0.17000000 W

F2 - Processing parameters  
SI 32768  
SF 125.5387918 MHz  
WDW EM  
SSB 0  
LB 1.00 Hz  
GB 0  
PC 1.40

<sup>1</sup>H NMR (500 MHz, MeOH-d<sub>4</sub>), (R)-2-amino-3-(1H-imidazol-4-yl)-N-(4-nitrophenethyl)propanamide (**4p**):

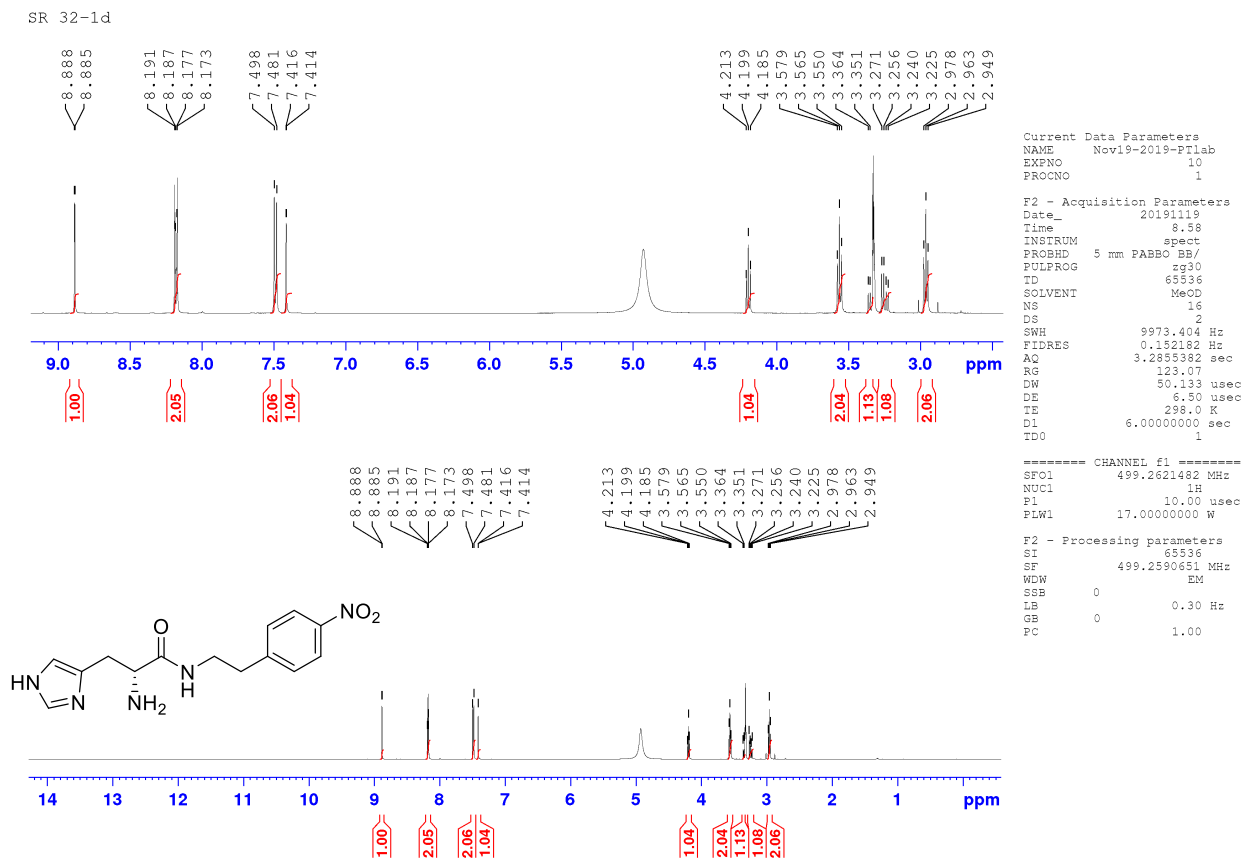

<sup>13</sup>C NMR (126 MHz, MeOH-d<sub>4</sub>), (R)-2-amino-3-(1H-imidazol-4-yl)-N-(4-nitrophenethyl)propanamide (**4p**):

SR 32-1 d 13C

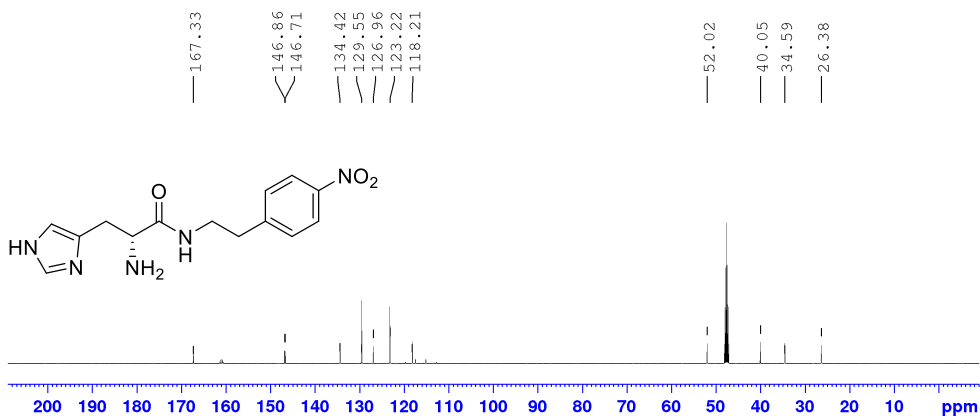

```
Current Data Parameters
NAME      Nov20-2019-PTlab
EXPNO     50
PROCNO    1

F2 - Acquisition Parameters
Date_     20191120
Time      17.06
INSTRUM   spect
PROBHD    5 mm PABBO BB/
PULPROG   zgpg30
ID         65536
SOLVENT   MeOD
NS         512
DS         4
SWH        29761.904 Hz
FIDRES     0.454131 Hz
AQ         1.1010048 sec
RG         191.52
DW         16.800 usec
DE         10.00 usec
TE         300.0 K
D1         2.0000000 sec
D11        0.0300000 sec
TD0        1

===== CHANNEL f1 =====
SFO1      125.5513451 MHz
NUC1       13C
P1         10.00 usec
PLW1       71.00000000 W

===== CHANNEL f2 =====
SFO2      499.2610621 MHz
NUC2       1H
CPDPRG[2] waltz16
PCPD2     80.00 usec
PLW2       17.00000000 W
PLW12     0.26563001 W
PLW13     0.17000000 W

F2 - Processing parameters
SI         32768
SF         125.5387918 MHz
WDW        EM
SSB        0
LB         1.00 Hz
GB         0
PC         1.40
```



<sup>1</sup>H NMR (500 MHz, MeOH-d<sub>4</sub>), (S)-N-(2-([1,1'-biphenyl]-4-yl)ethyl)-2-amino-3-(1H-imidazol-4-yl)propanamide

(4q):

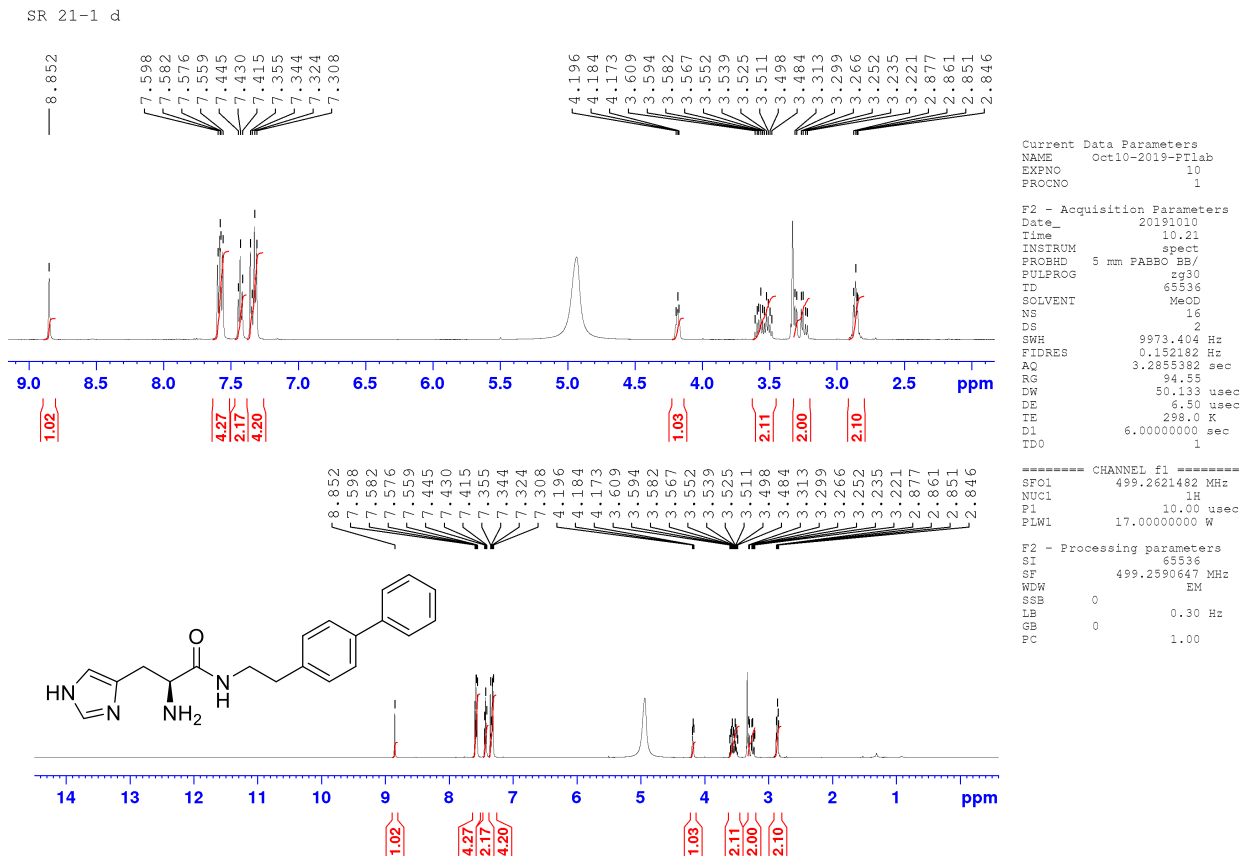

<sup>13</sup>C NMR (126 MHz, MeOH-d<sub>4</sub>), (S)-N-(2-([1,1'-biphenyl]-4-yl)ethyl)-2-amino-3-(1H-imidazol-4-yl)propanamide

(4q):

SR 21-1 d 13C

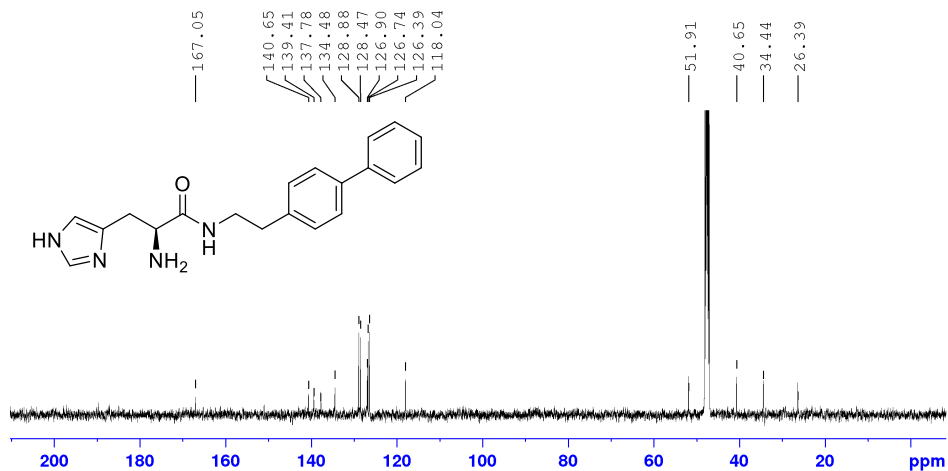

```
Current Data Parameters
NAME      Oct16-2019-FTLab
EXPNO     30
PROCNO    1

F2 - Acquisition Parameters
Date_     20191016
Time      15.14
INSTRUM   spect
PROBHD    5 mm PABBO BB/
PULPROG   zgpg30
TD        65536
SOLVENT   MeOD
NS         512
DS         4
SWH        29761.904 Hz
FIDRES     0.454131 Hz
AQ         1.1010048 sec
RG         191.52
DW         16.800 usec
DE         10.00 usec
TE         300.0 K
D1         2.0000000 sec
D11        0.0300000 sec
TDO        1

===== CHANNEL f1 =====
SFO1      125.5513451 MHz
NUC1       13C
P1         10.00 usec
PLW1       71.00000000 W

===== CHANNEL f2 =====
SFO2      499.2610621 MHz
NUC2       1H
CPDPRG2   waltz16
PCPD2      80.00 usec
PLW2       17.00000000 W
PLW12      0.26563001 W
PLW13      0.17000000 W

F2 - Processing parameters
SI         32768
SF         125.5387918 MHz
WDW        EM
SSB        0
LB         3.00 Hz
GB         0
PC         1.40
```

<sup>1</sup>H NMR (500 MHz, MeOH-d<sub>4</sub>), (*R*)-*N*-(2-([1,1'-biphenyl]-4-yl)ethyl)-2-amino-3-(1*H*-imidazol-4-yl)propanamide

(4r):

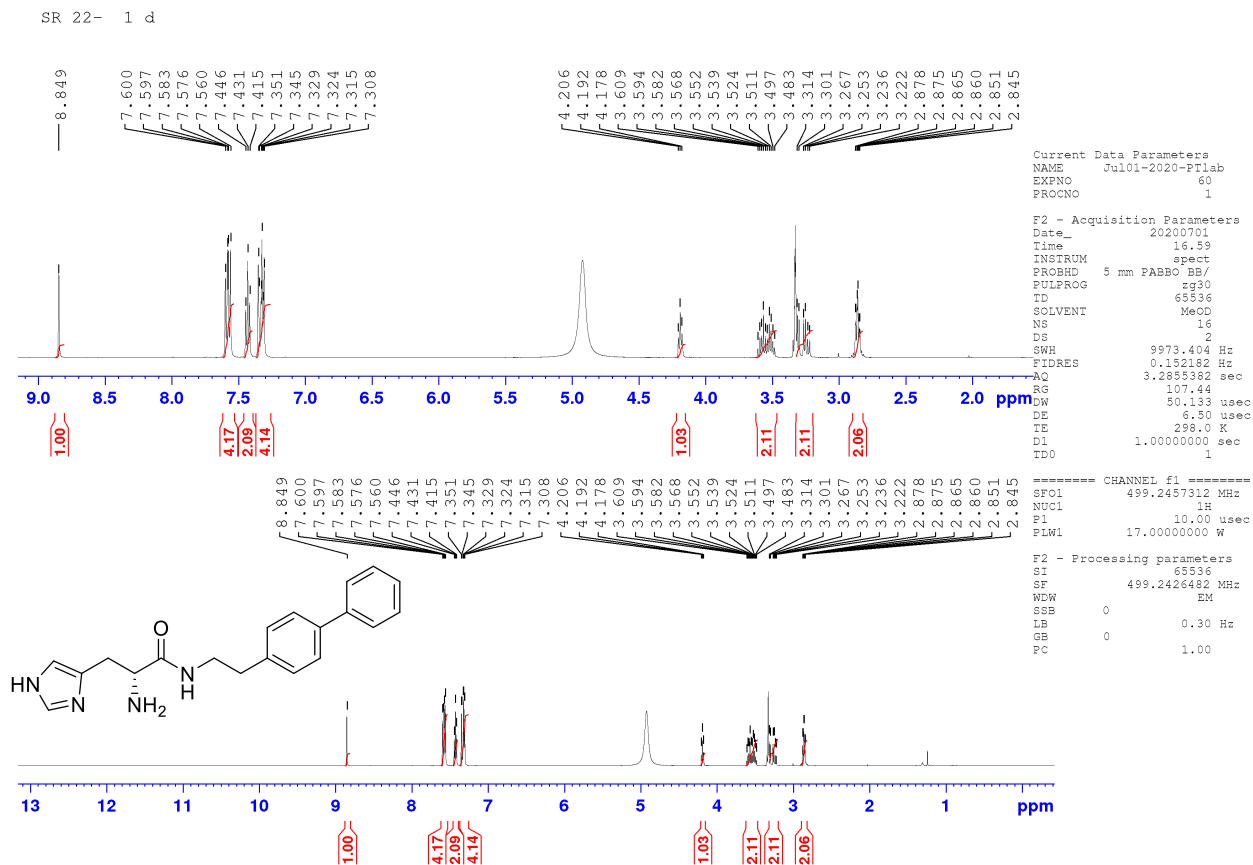

<sup>13</sup>C NMR (126 MHz, MeOH-d<sub>4</sub>), (R)-N-(2-([1,1'-biphenyl]-4-yl)ethyl)-2-amino-3-(1H-imidazol-4-yl)propanamide

(4r):

SR 22-1 d 13C

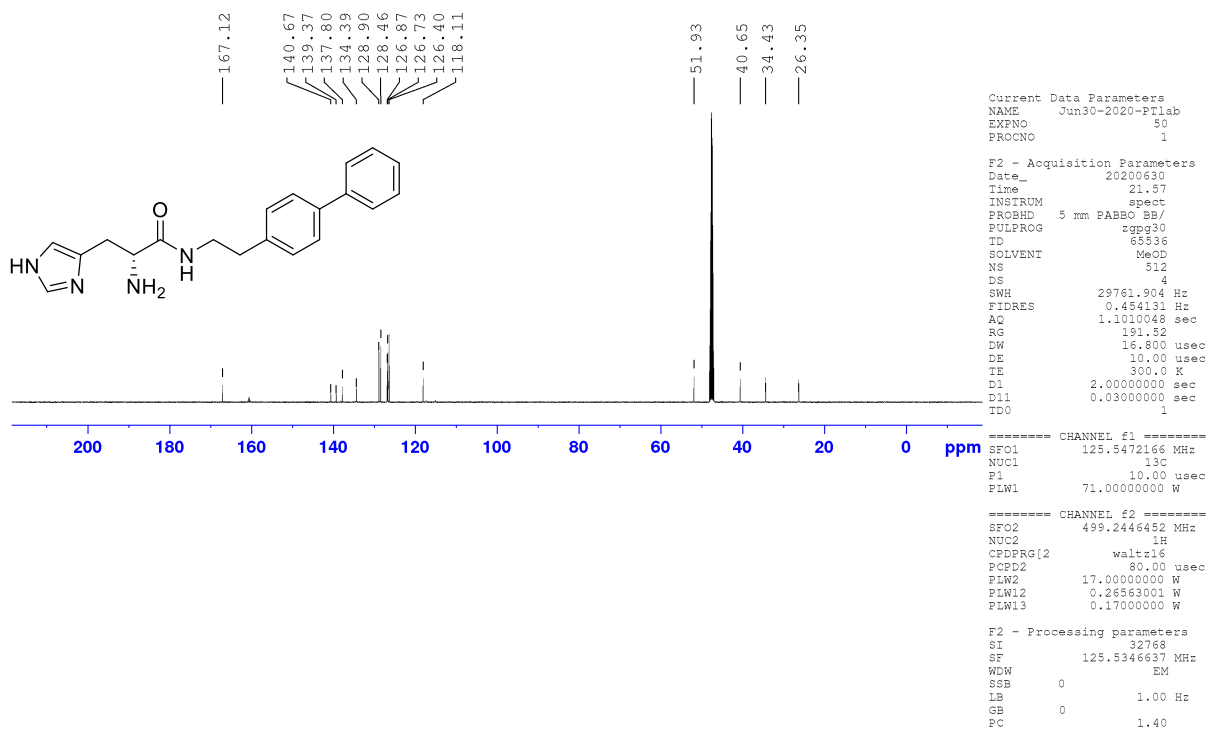

<sup>1</sup>H NMR (400 MHz, MeOH-d<sub>4</sub>), (S)-2-amino-N-benzyl-3-(1H-imidazol-4-yl)propanamide (**5a**):

KS-100-d  
zg30 MeOD {C:\Bruker\TopSpin3.2\Iconnmr} PTLab 20

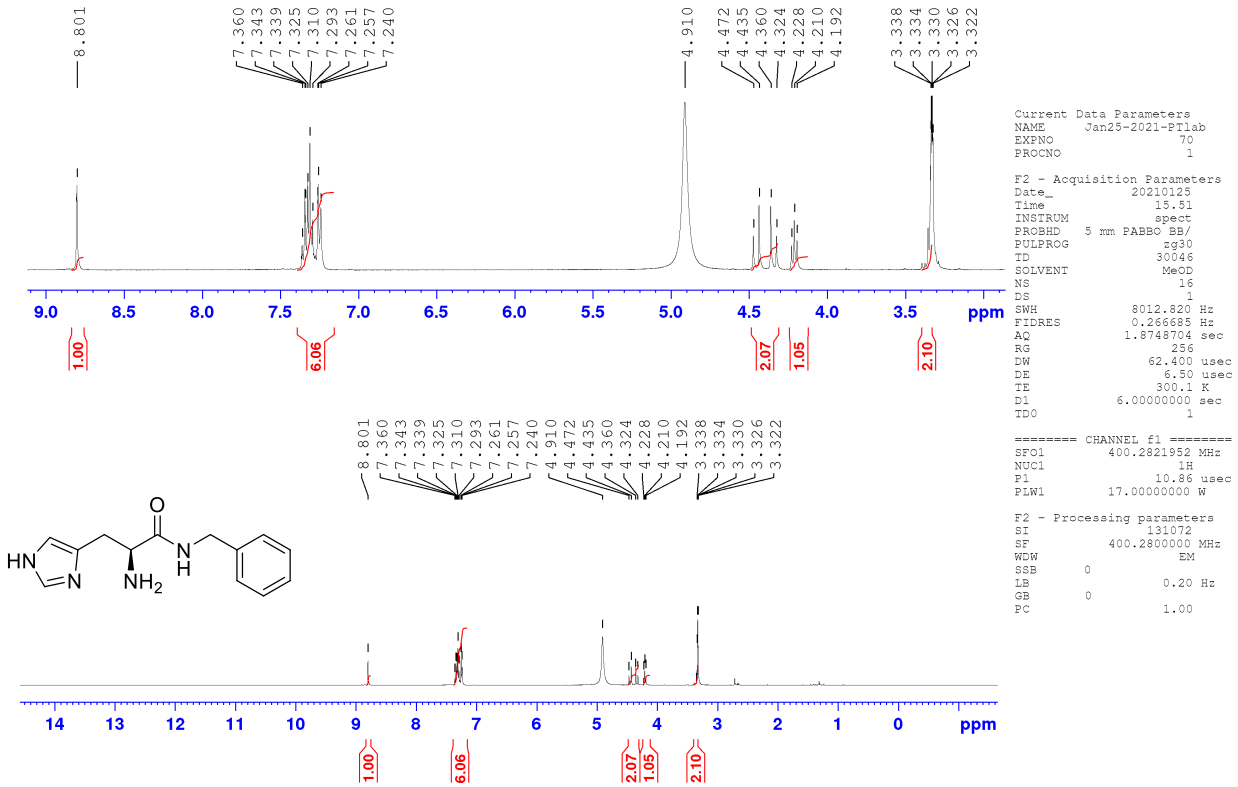

<sup>13</sup>C NMR (100 MHz, MeOH-d<sub>4</sub>), (S)-2-amino-N-benzyl-3-(1H-imidazol-4-yl)propanamide (**5a**):

KS-100-d Carbon  
C13CPD MeOD {C:\Bruker\TopSpin3.2\Iconnmr} PTLab 1

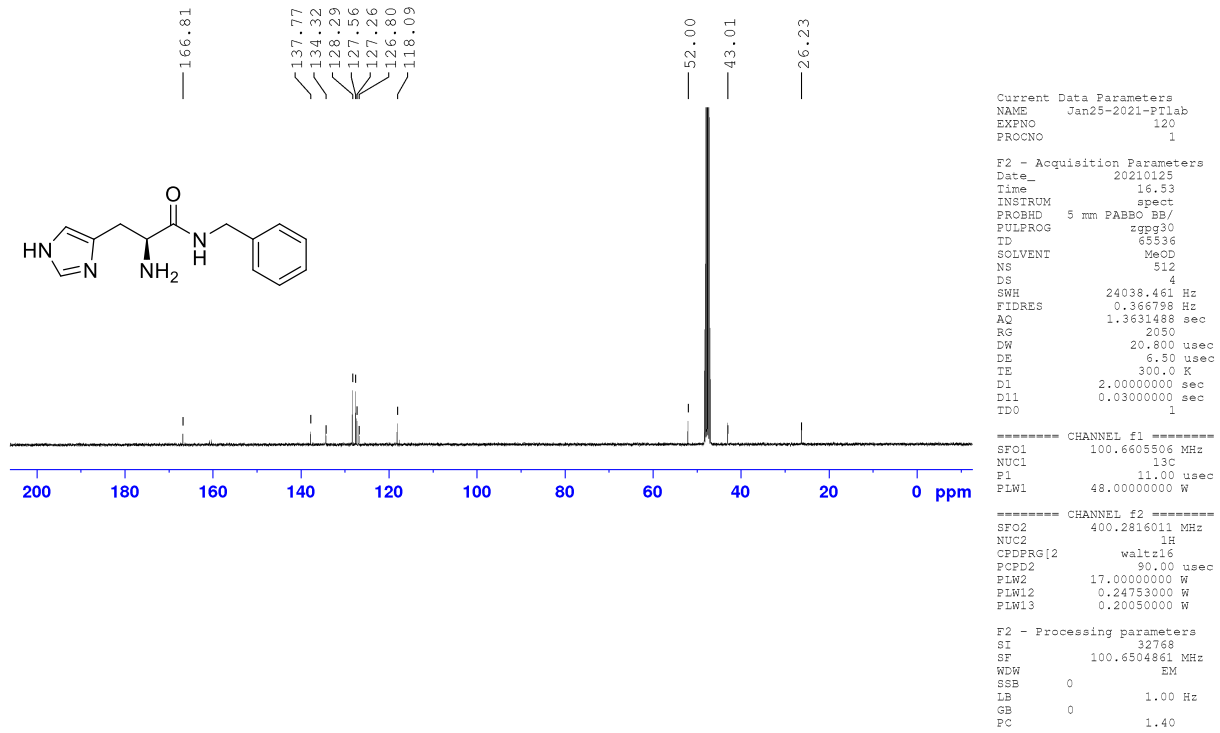

<sup>1</sup>H NMR (400 MHz, MeOH-d<sub>4</sub>), (S)-2-amino-3-(1H-3l4-imidazol-4-yl)-N-(4-methoxybenzyl)propanamide

(5b):

SR 20-2 d  
zg30 MeOD {C:\Bruker\TopSpin3.2\Iconnmr} PTLab 15

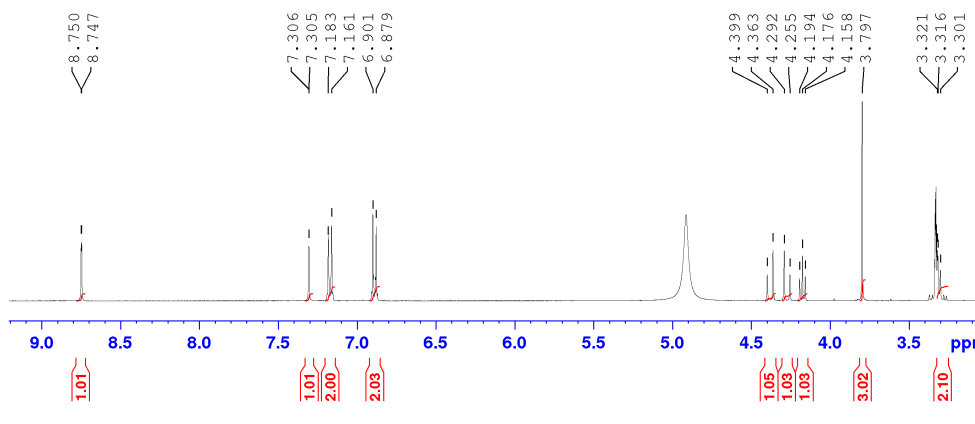

Current Data Parameters  
NAME Dec28-2020-Flab  
EXPNO 140  
PROCNO 1  
F2 - Acquisition Parameters  
Date\_ 20201228  
Time 20:22  
INSTRUM spect  
PROBHD 5 mm F4BBO BB/  
PULPROG zg30  
TD 30046  
SOLVENT MeOD  
NS 16  
DS 1  
SWH 8012.820 Hz  
FIDRES 0.266685 Hz  
AQ 1.8748704 sec  
RG 256  
DW 62.400 usec  
DE 6.50 usec  
TE 300.1 K  
D1 6.00000000 sec  
TDO 1

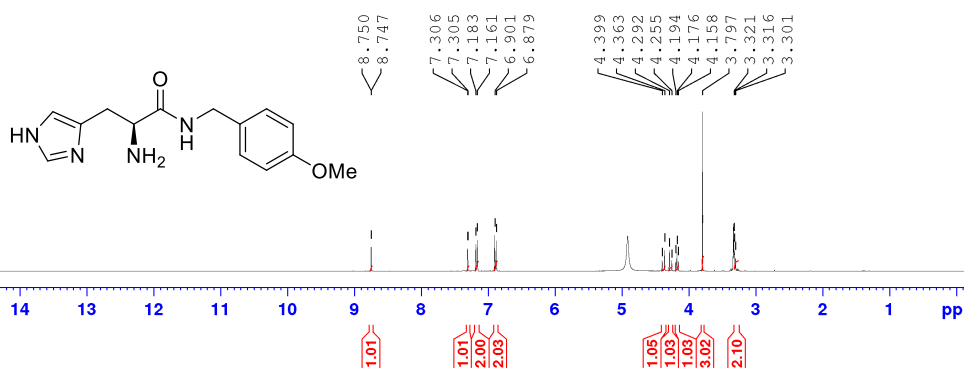

----- CHANNEL f1 -----  
SF01 400.2821952 MHz  
NUC1 1H  
P1 10.86 usec  
PLW1 17.00000000 W  
F2 - Processing parameters  
SI 131072  
SF 400.2800000 MHz  
WDW EM  
SSB 0  
LB 0.20 Hz  
GB 0  
PC 1.00

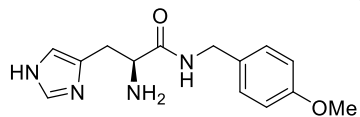

<sup>13</sup>C NMR (100 MHz, MeOH-d<sub>4</sub>), (S)-2-amino-3-(1*H*-3*H*-imidazol-4-yl)-*N*-(4-methoxybenzyl)propanamide

(5b):

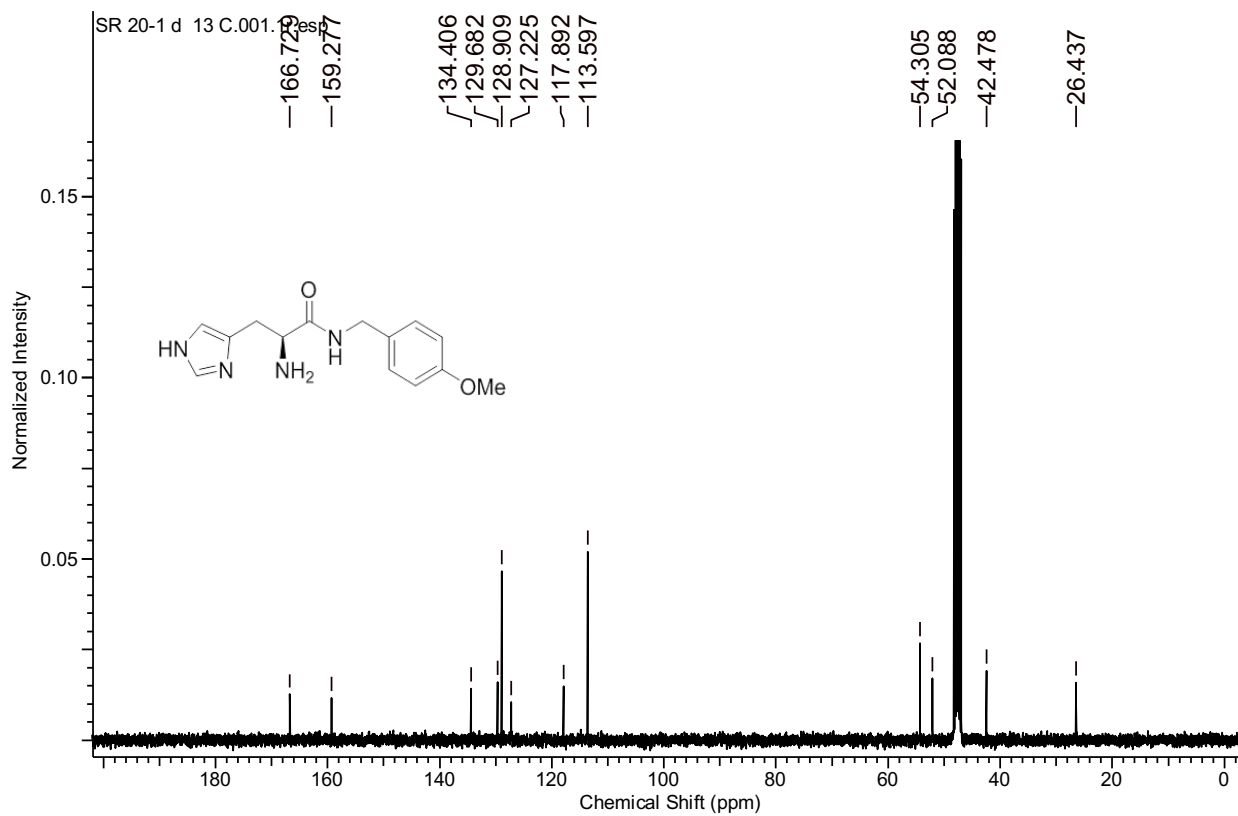



<sup>1</sup>H NMR (400 MHz, MeOH-d<sub>4</sub>), (R)-2-amino-3-(1H-imidazol-4-yl)-N-(4-methoxybenzyl)propanamide(**5c**):

PSK-12  
zg30 MeOD {C:\Bruker\TopSpin3.2\Iconnmr} PTLab 9

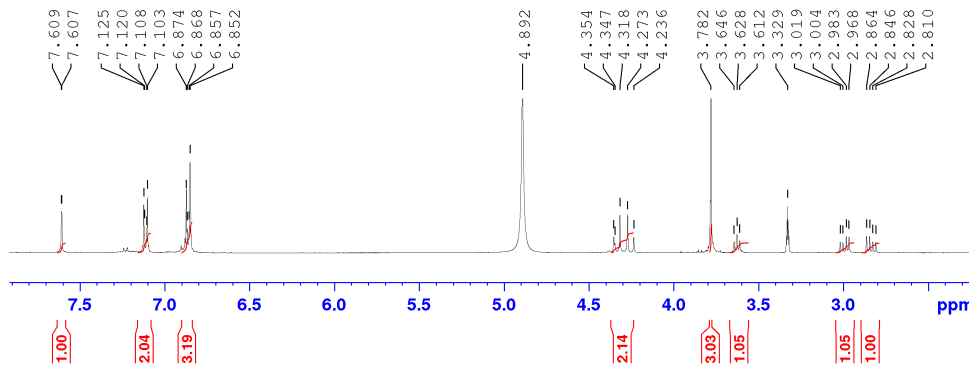

Current Data Parameters  
NAME Nov17-2020-PTLab  
EXPNO 90  
PROCNO 1

F2 - Acquisition Parameters  
Date\_ 20201117  
Time 14.30  
INSTRUM spect  
PROBHD 5 mm PABBO BB/  
PULPROG zg30  
TD 30046  
SOLVENT MeOD  
NS 12  
DS 1  
SWH 8012.820 Hz  
FIDRES 0.266685 Hz  
AQ 1.8748704 sec  
RG 114  
DW 62.400 usec  
DE 6.50 usec  
TE 300.0 K  
D1 6.00000000 sec  
TDO 1

===== CHANNEL f1 =====  
SF01 400.2821952 MHz  
NUC1 1H  
P1 10.86 usec  
PLW1 17.00000000 W

F2 - Processing parameters  
SI 131072  
SF 400.2800000 MHz  
WDW EM  
SSB 0  
LB 0.20 Hz  
GB 0  
PC 1.00

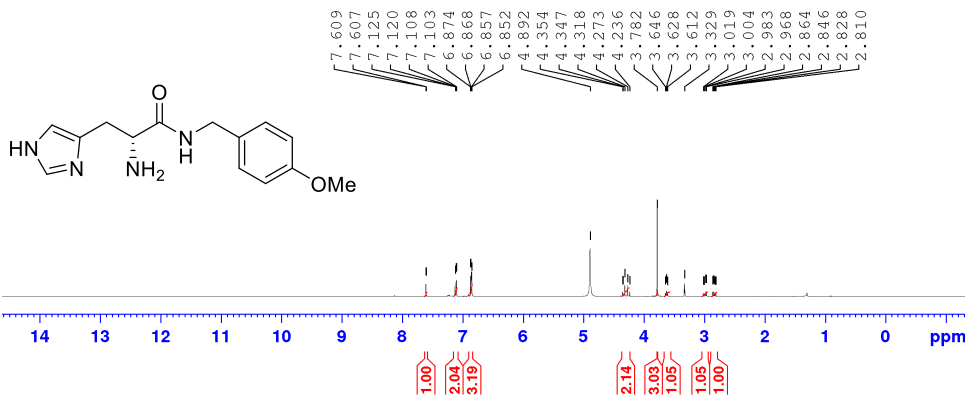

<sup>13</sup>C NMR (100 MHz, MeOH-d<sub>4</sub>), (R)-2-amino-3-(1H-imidazol-4-yl)-N-(4-methoxybenzyl)propanamide(5c):

PSK-12  
zgpg30 MeOD {C:\Bruker\TopSpin3.2\Iconnmr} PTLab 9

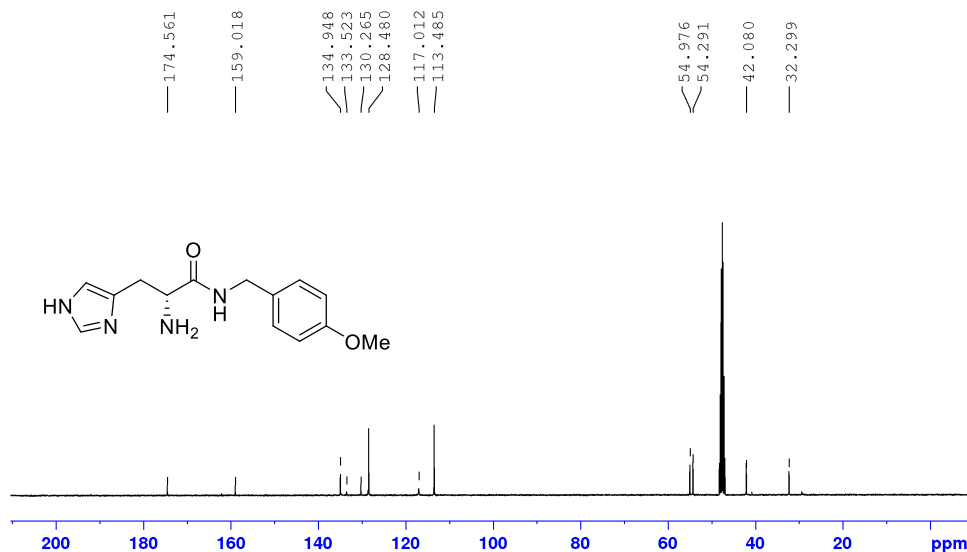

Current Data Parameters  
NAME Nov17-2020-PTLab  
EXPNO 150  
PROCNO 1

F2 - Acquisition Parameters  
Date\_ 20201117  
Time 18.13  
INSTRUM spect  
PROBHD 5 mm PABBO BB/  
PULPROG zgpg30  
TD 32768  
SOLVENT MeOD  
NS 1024  
DS 4  
SWH 22058.824 Hz  
FIDRES 0.673182 Hz  
AQ 0.7427413 sec  
RG 1620  
DW 22.667 usec  
DE 6.50 usec  
TE 300.1 K  
D1 1.5000000 sec  
D11 0.0300000 sec  
TD0 1

==== CHANNEL f1 =====  
SFO1 100.6606368 MHz  
NUC1 13C  
P1 11.00 usec  
PLW1 48.00000000 W

==== CHANNEL f2 =====  
SFO2 400.2818195 MHz  
NUC2 1H  
CPDPRG2 waltz16  
PCPD2 90.00 usec  
PLW2 17.00000000 W  
PLW12 0.24753000 W  
PLW13 0.20050000 W

F2 - Processing parameters  
SI 16384  
SF 100.6504861 MHz  
WDW EM  
SSB 0  
LB 1.50 Hz  
GB 0  
EC 1.40

<sup>1</sup>H NMR (500 MHz, MeOH-d<sub>4</sub>), (S)-2-amino-3-(1H-3l4-imidazol-4-yl)-N-(2-methoxybenzyl)propanamide

(5d):

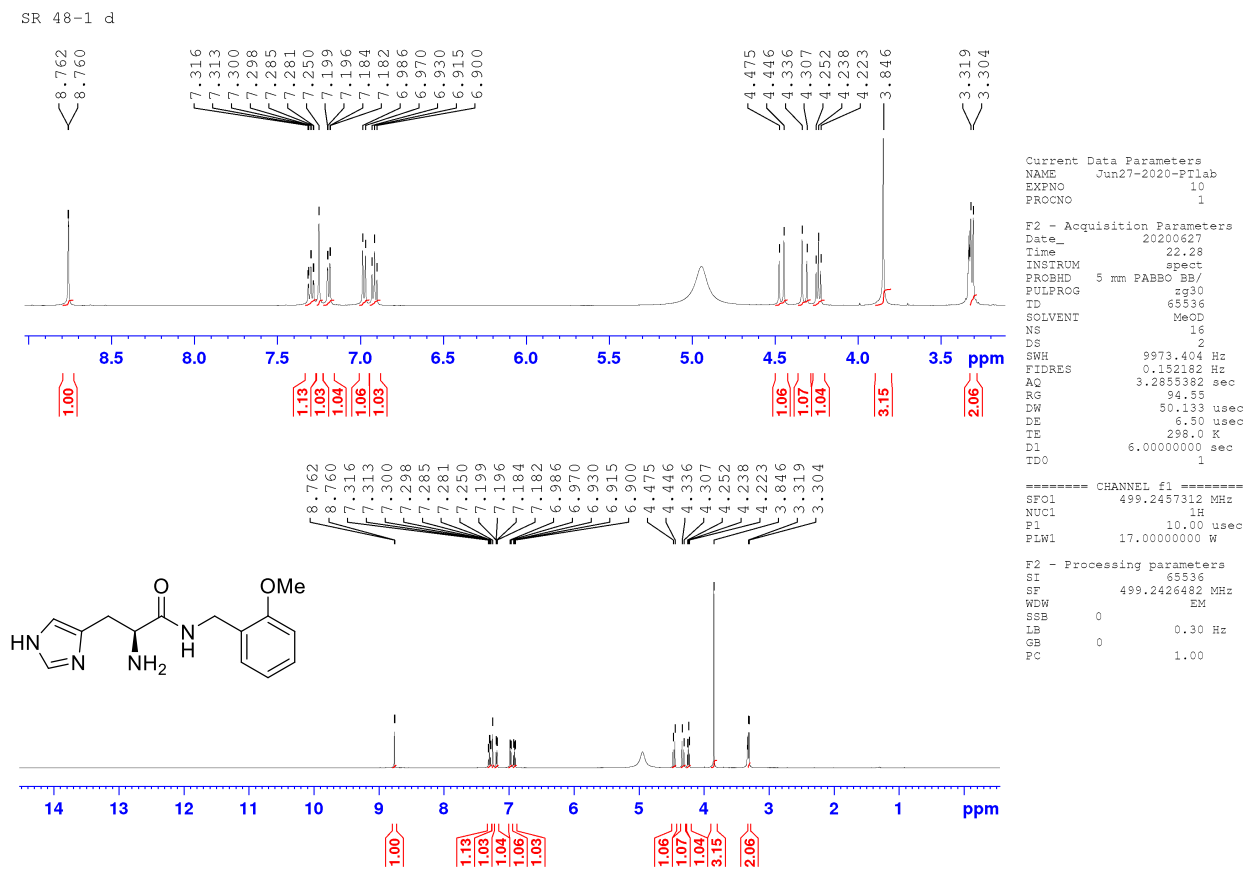

<sup>13</sup>C NMR (126 MHz, MeOH-d<sub>4</sub>), (S)-2-amino-3-(1H-imidazol-4-yl)-N-(2-methoxybenzyl)propanamide

(5d):

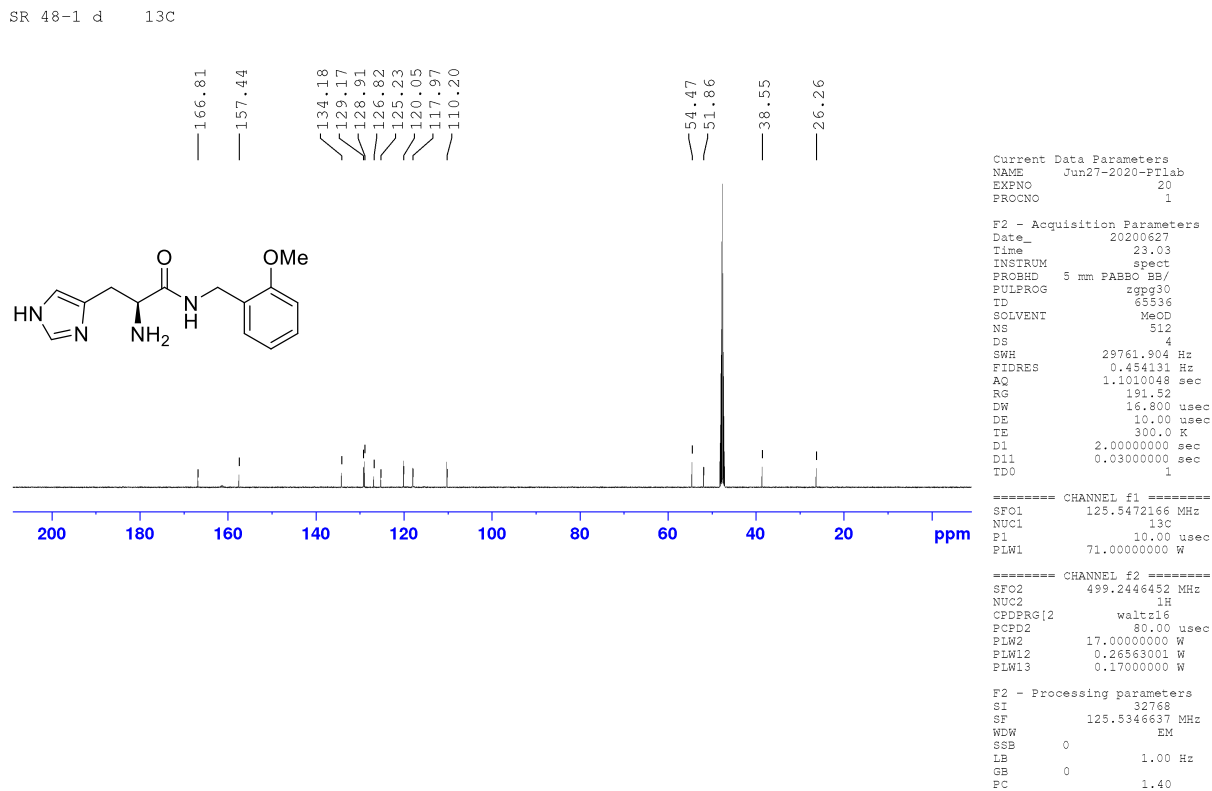

<sup>1</sup>H NMR (400 MHz, MeOH-d<sub>4</sub>), (R)-2-amino-3-(1H-3i4-imidazol-4-yl)-N-(2-methoxybenzyl)propanamide (**5e**):

SR 16-2 d  
zg30 MeOD {C:\Bruker\TopSpin3.2\Iconnmr} PTLab 14

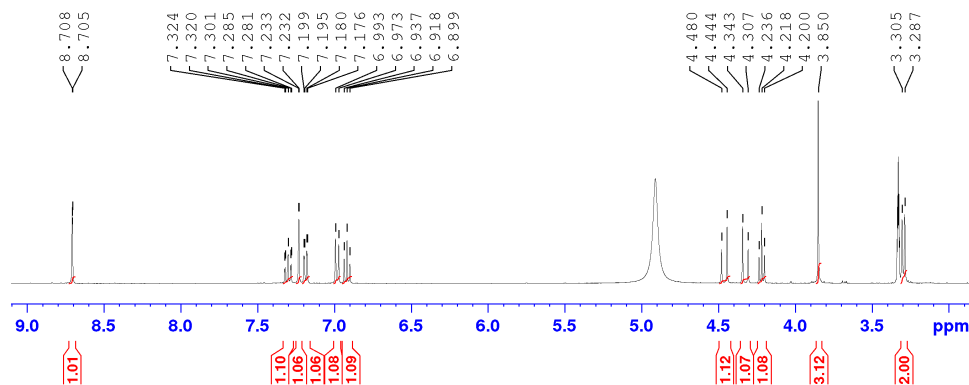

Current Data Parameters  
NAME Dec28-2020-PTLab  
EXPNO 130  
PROCNO 1

F2 - Acquisition Parameters  
Date\_ 20201228  
Time 20.15  
INSTRUM spect  
PROBHD 5 mm PABBO BBI/  
PULPROG zg30  
TD 30046  
SOLVENT MeOD  
NS 16  
DS 1  
SWH 8012.820 Hz  
FIDRES 0.266685 Hz  
AQ 1.8748704 sec  
RG 256  
LW 62.400 usec  
DE 6.50 usec  
TE 300.0 K  
D1 6.00000000 sec  
TDO 1

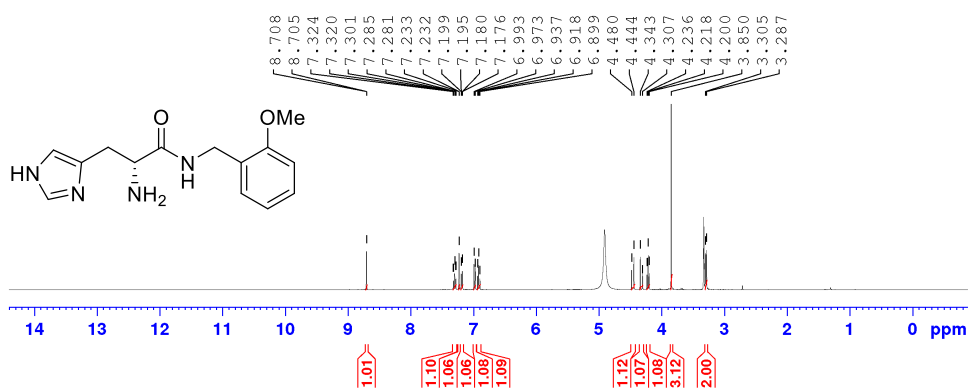

----- CHANNEL f1 -----  
SFO1 400.2821952 MHz  
NUC1 1H  
P1 10.86 usec  
PLW1 17.00000000 W

F2 - Processing parameters  
SI 131072  
SF 400.2800000 MHz  
WDW EM  
SSB 0  
LB 0.20 Hz  
GB 0  
PC 1.00

<sup>13</sup>C NMR (100 MHz, MeOH-d<sub>4</sub>), (*R*)-2-amino-3-(1*H*-3*H*-imidazol-4-yl)-*N*-(2-methoxybenzyl)propanamide (**5e**):

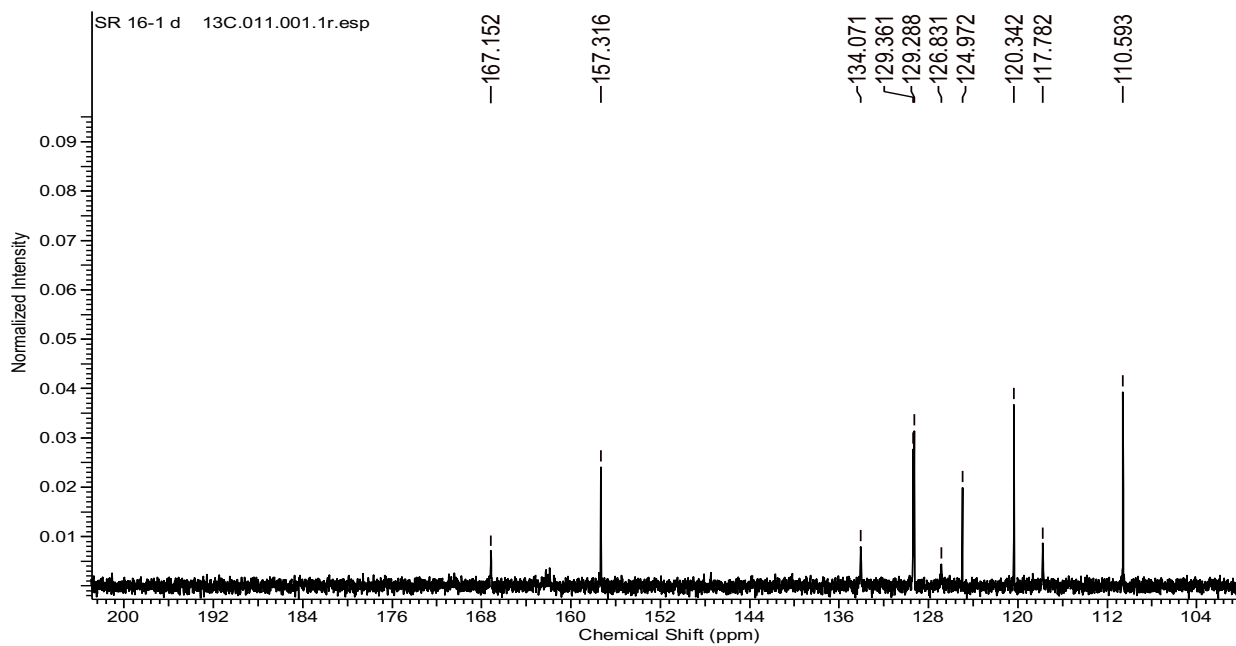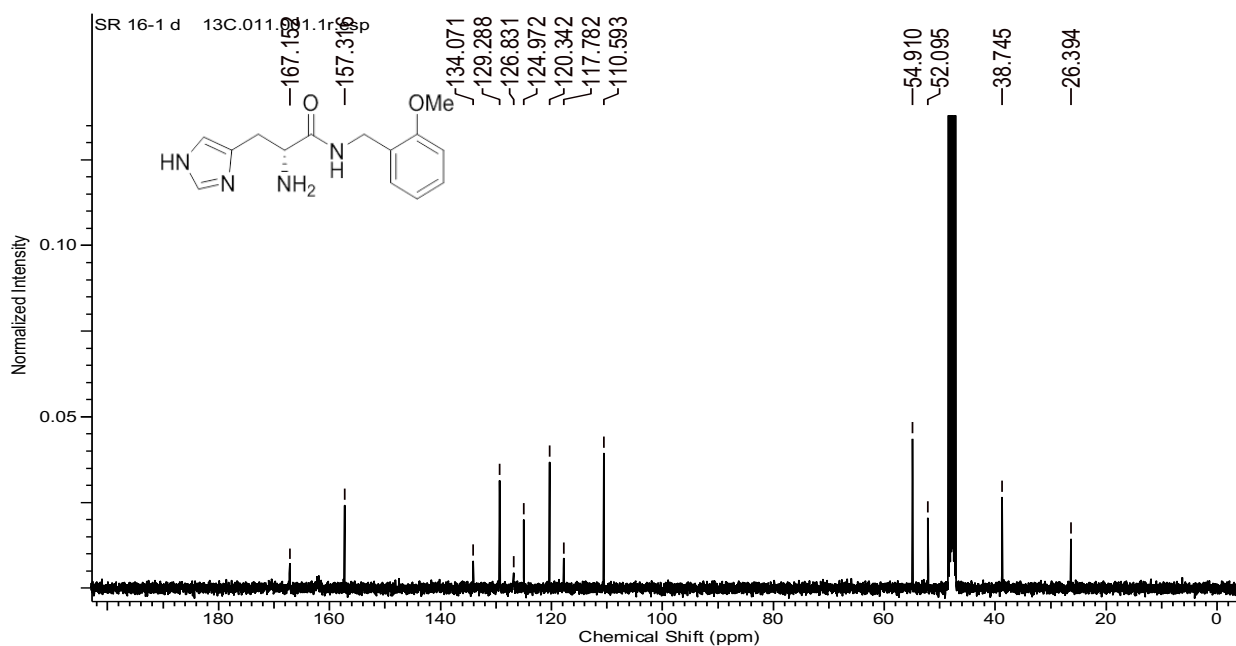

<sup>1</sup>H NMR (500 MHz, MeOH-d<sub>4</sub>), (S)-2-amino-3-(1H-3/4-imidazol-4-yl)-N-(3-methoxybenzyl)propanamide

(5f):

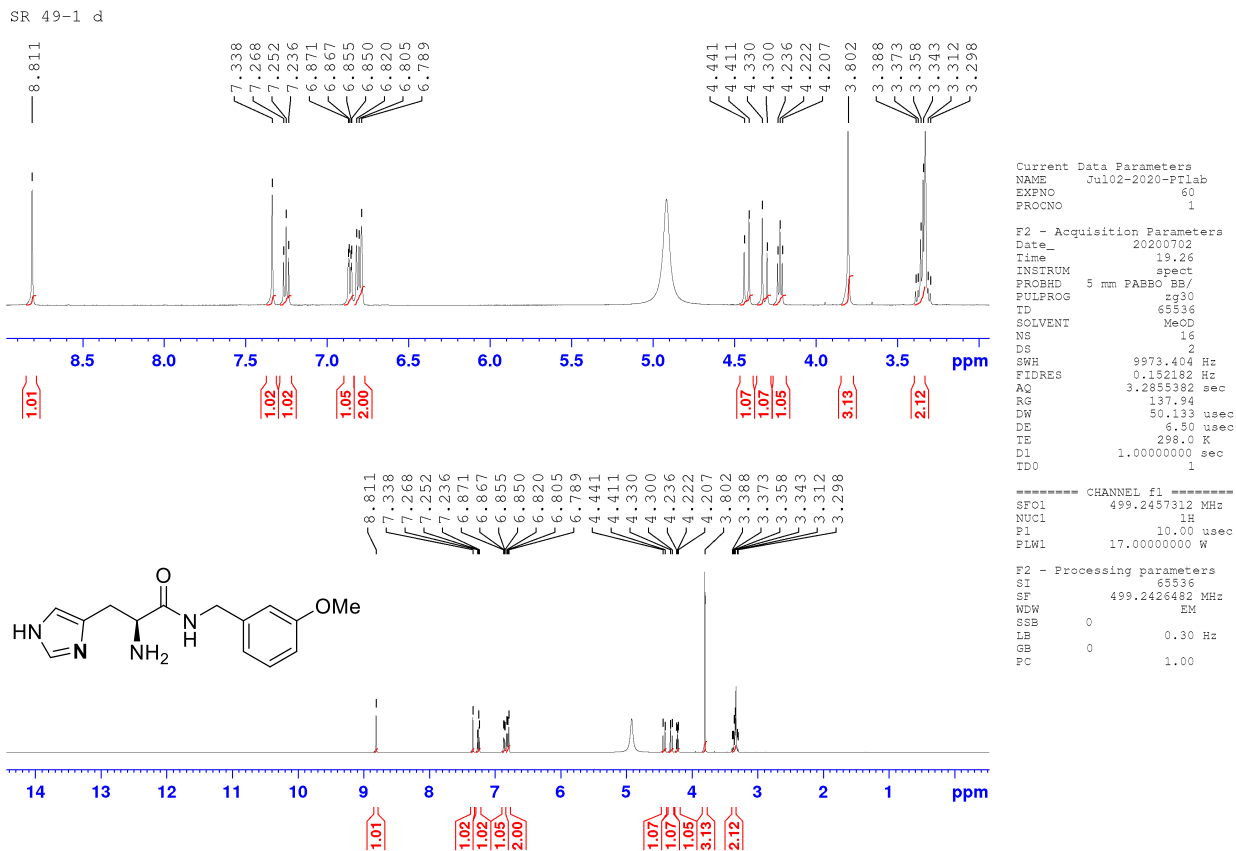

<sup>13</sup>C NMR (126 MHz, MeOH-d<sub>4</sub>), (S)-2-amino-3-(1H-3l4-imidazol-4-yl)-N-(3-methoxybenzyl)propanamide

(5f):

SR 49-1 d 13C

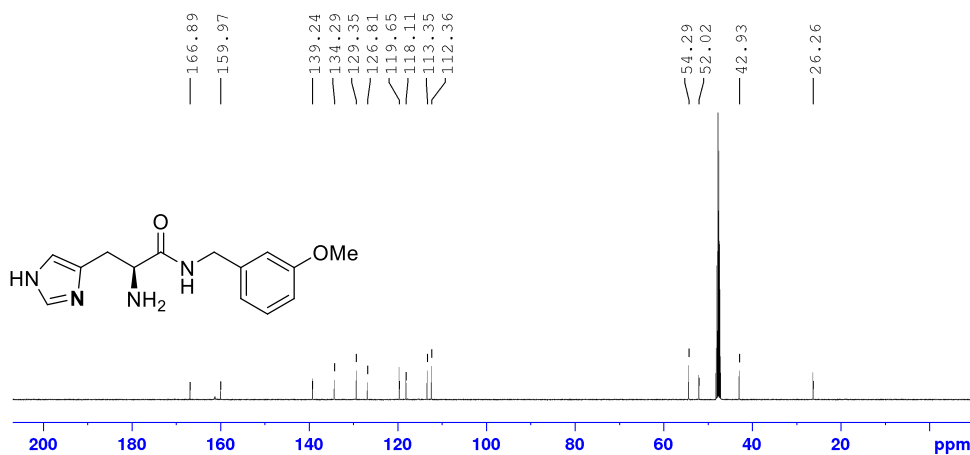

Current Data Parameters  
NAME Jul02-2020-F11ab  
EXPNO 70  
PROCNO 1  
F2 - Acquisition Parameters  
Date\_ 20200702  
Time 20.11  
INSTRUM spect  
PROBHD 5 mm PABBO BB/  
PULPROG zgpg30  
TD 65536  
SOLVENT MeOD  
NS 512  
DS 4  
SWH 29761.904 Hz  
FIDRES 0.454131 Hz  
AQ 1.1010048 sec  
RG 191.52  
DW 16.800 usec  
DE 10.00 usec  
TE 300.0 K  
D1 2.0000000 sec  
D11 0.0300000 sec  
TDO 1

===== CHANNEL f1 =====  
SFO1 125.5472166 MHz  
NUC1 13C  
P1 10.00 usec  
PLW1 71.00000000 W

===== CHANNEL f2 =====  
SFO2 499.2446452 MHz  
NUC2 1H  
CPDPRG[2] waltz16  
PCPD2 80.00 usec  
PLW2 17.00000000 W  
PLW12 0.26563001 W  
PLW13 0.17000000 W

F2 - Processing parameters  
SI 32768  
SF 125.5346637 MHz  
WDW EM  
SSB 0  
LB 1.00 Hz  
GB 0  
FC 1.40



<sup>1</sup>H NMR (400 MHz, MeOH-d<sub>4</sub>), (R)-2-amino-3-(1H-3l4-imidazol-4-yl)-N-(3-methoxybenzyl)propanamide

(5g):

SR 70-1 d  
zg30 MeOD (C:\Bruker\TopSpin3.2\Iconnmr) P1lab 18

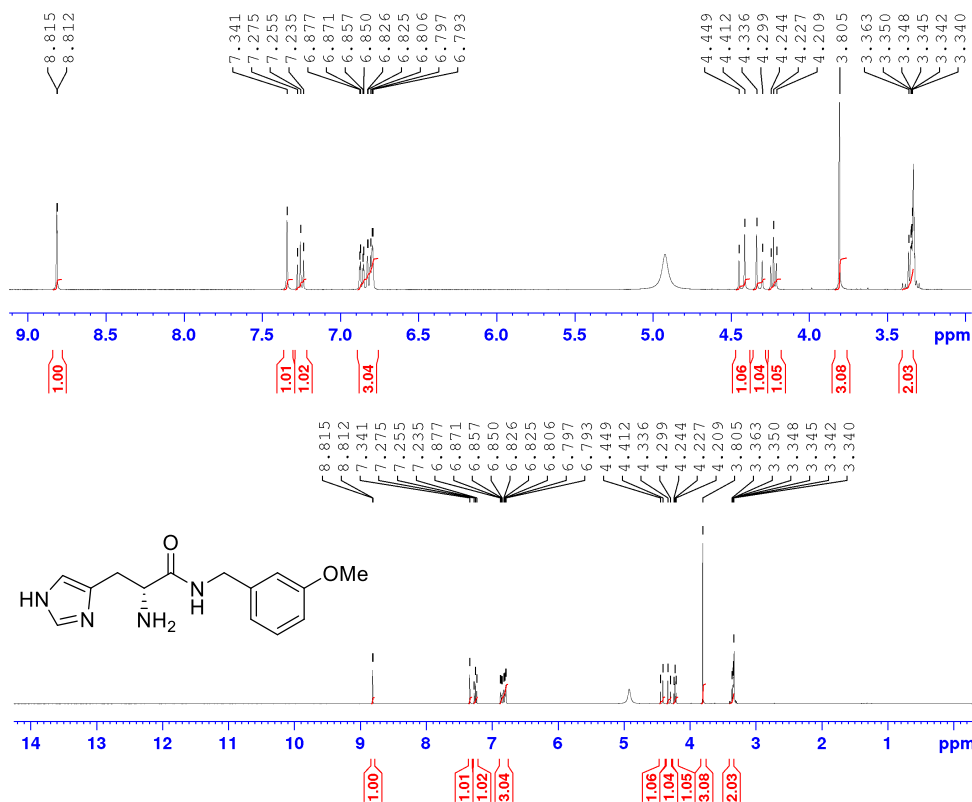

```

Current Data Parameters
NAME      Nov18-2020-P1lab
EXPNO    191
PROCNO   1

F2 - Acquisition Parameters
Date_    20201118
Time     21.39
INSTRUM  spect
PROBHD   5 mm PABBO BB/
PULPROG  zg30
ID       30046
SOLVENT  MeOD
NS       16
DS       1
SWH      8012.820 Hz
FIDRES   0.266685 Hz
AQ       1.8748704 sec
RG       256
DW       62.400 usec
DE       6.50 usec
TE       300.0 K
D1       6.00000000 sec
TD0      1

===== CHANNEL f1 =====
SF01    400.2821952 MHz
NUC1     1H
P1       10.86 usec
PLW1    17.00000000 W

F2 - Processing parameters
SI       131072
SF       400.2799988 MHz
WDW      EM
SSB      0
LB       0.20 Hz
GB       0
PC       1.00
    
```

<sup>13</sup>C NMR (100 MHz, MeOH-d<sub>4</sub>), (R)-2-amino-3-(1H-3/4-imidazol-4-yl)-N-(3-methoxybenzyl)propanamide

(5g):

SR 70-1 d 13C  
C13CPD MeOD {C:\Bruker\TopSpin3.2\Iconnmr} PTLab 18

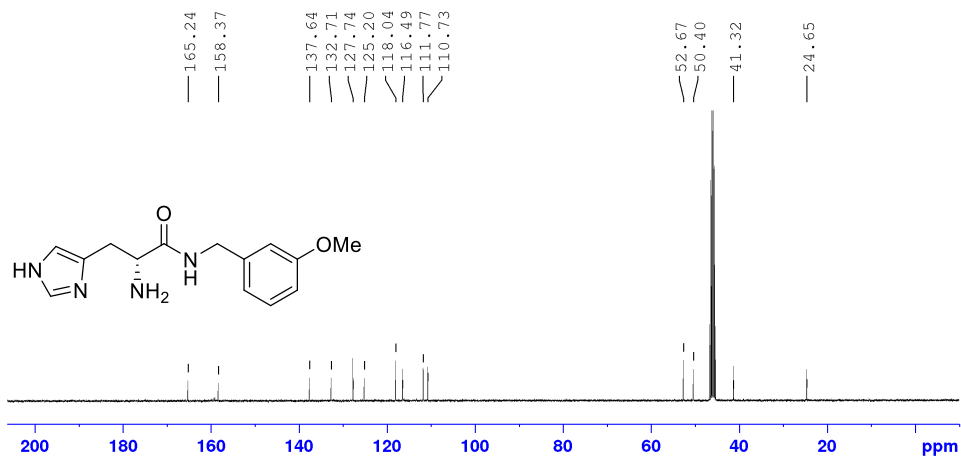

Current Data Parameters  
NAME Nov18-2020-PTLab  
EXFNO 200  
PROCNO 1

F2 - Acquisition Parameters  
Date\_ 20201118  
Time 22.31  
INSTRUM spect  
PROBHD 5 mm PABBO BB/  
PULPROG zgpg30  
TD 65536  
SOLVENT MeOD  
NS 512  
DS 4  
SWH 24038.461 Hz  
FIDRES 0.366798 Hz  
AQ 1.3631488 sec  
RG 2050  
DW 20.800 usec  
DE 6.50 usec  
TE 300.0 K  
D1 2.0000000 sec  
D11 0.0300000 sec  
TD0 1

===== CHANNEL f1 =====  
SFO1 100.6605506 MHz  
NUC1 13C  
P1 11.00 usec  
PLW1 48.00000000 W

===== CHANNEL f2 =====  
SFO2 400.2816011 MHz  
NUC2 1H  
CPDPRG2 waltz16  
PCPD2 90.00 usec  
PLW2 17.00000000 W  
PLW12 0.24753000 W  
PLW13 0.20050000 W

F2 - Processing parameters  
SI 32768  
SF 100.6504861 MHz  
WDW EM  
SSB 0  
LB 1.00 Hz  
GB 0  
PC 1.40

<sup>1</sup>H NMR (400 MHz, MeOH-d<sub>4</sub>), (S)-2-amino-3-(1H-imidazol-4-yl)-N-(4-(trifluoromethyl)benzyl)propanamide

(5h):

PSK-6  
zg30 MeOD {C:\Bruker\TopSpin3.2\Iconnmr} PTLab 9

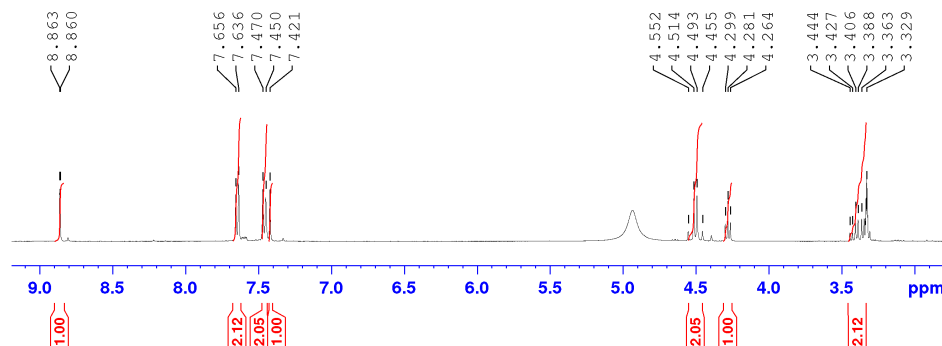

Current Data Parameters  
NAME Jan07-2021-PTLab  
EXPNO 60  
PROCNO 1

F2 - Acquisition Parameters  
Date\_ 20210107  
Time 17.14  
INSTRUM spect  
PROBHD 5 mm PABBO BB/  
PULPROG zg30  
TD 30046  
SOLVENT MeOD  
NS 16  
DS 1  
SWH 8012.820 Hz  
FIDRES 0.266685 Hz  
AQ 1.8748704 sec  
RG 256  
DW 62.400 usec  
DE 6.50 usec  
TE 300.0 K  
D1 6.00000000 sec  
TDO 1

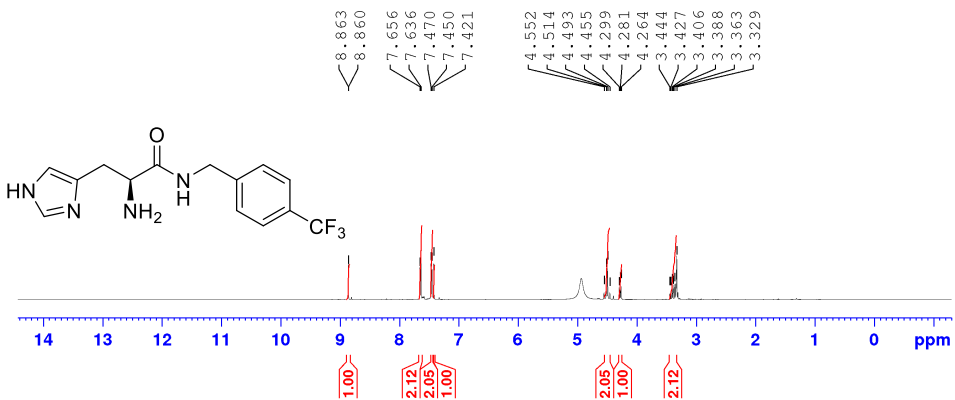

==== CHANNEL f1 =====  
SF01 400.2821952 MHz  
NUC1 1H  
P1 10.86 usec  
PLW1 17.00000000 W

F2 - Processing parameters  
SI 131072  
SF 400.2800000 MHz  
WDW EM  
SBB 0  
LB 0.20 Hz  
GB 0  
PC 1.00

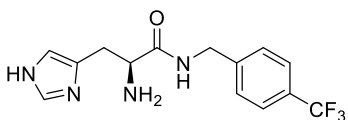

<sup>13</sup>C NMR (100 MHz, MeOH-d<sub>4</sub>), (S)-2-amino-3-(1H-imidazol-4-yl)-N-(4-(trifluoromethyl)benzyl)propanamide

(5h):

PSK-6-Carbon

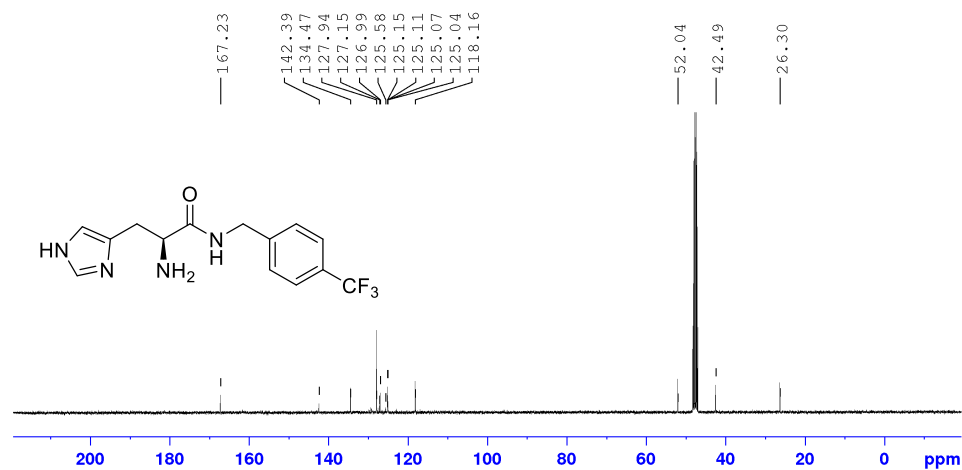

```
Current Data Parameters
NAME      Jan07-2021-PTlab
EXPNO     61
PROCNO    1

F2 - Acquisition Parameters
Date_     20210107
Time      17.33
INSTRUM   spect
PROBHD    5 mm PABBO BB/
PULPROG   zgpg30
TD         65536
SOLVENT   MeOD
NS         300
DS         4
SWH       24038.461 Hz
FIDRES    0.366798 Hz
AQ         1.3631488 sec
RG         2050
DW         20.800 usec
DE         6.50 usec
TE         300.1 K
D1         2.0000000 sec
D11        0.0300000 sec
TDO        1

===== CHANNEL f1 =====
SFO1      100.6605506 MHz
NUC1       13c
P1         11.00 usec
PLW1       48.0000000 W

===== CHANNEL f2 =====
SFO2      400.2816011 MHz
NUC2       1H
CPDPRG2   waltz16
PCPD2     90.00 usec
PLW2       17.0000000 W
PLW12     0.24753000 W
PLW13     0.20050000 W

F2 - Processing parameters
SI         32768
SF         100.6504861 MHz
WDW        EM
SSB        0
LB         1.00 Hz
GB         0
PC         1.40
```

<sup>1</sup>H NMR (400 MHz, MeOH-d<sub>4</sub>), (R)-2-amino-3-(1H-imidazol-4-yl)-N-(4-(trifluoromethyl)benzyl)propanamide

(5i):

KS-102

zg30 MeOD {C:\Bruker\TopSpin3.2\Iconnmr} PTLab 12

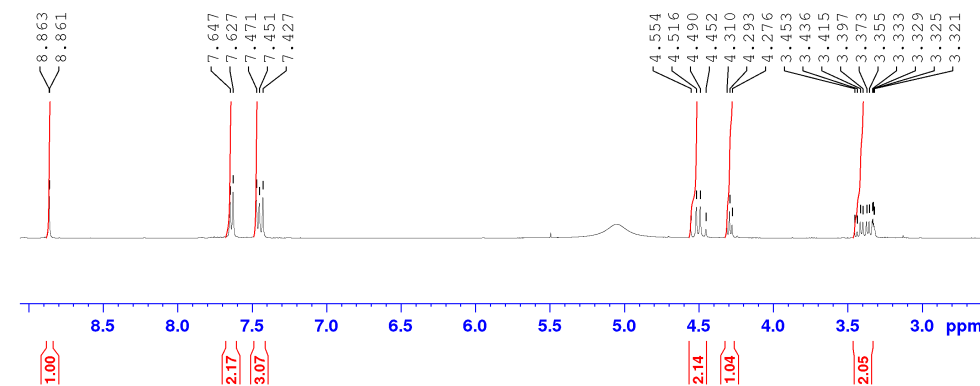

Current Data Parameters  
 NAME Nov28-2020-PTLab  
 EXPNO 50  
 PROCNO 1

F2 - Acquisition Parameters  
 Date\_ 20201128  
 Time 21.23  
 INSTRUM spect  
 PROBHD 5 mm PABBO BB/  
 PULPROG zg30  
 ID 30046  
 SOLVENT MeOD  
 NS 12  
 DS 1  
 SWH 8012.820 Hz  
 FIDRES 0.266685 Hz  
 AQ 1.8748704 sec  
 RG 101  
 DW 62.400 usec  
 DE 6.50 usec  
 TE 300.1 K  
 D1 6.00000000 sec  
 TDO 1

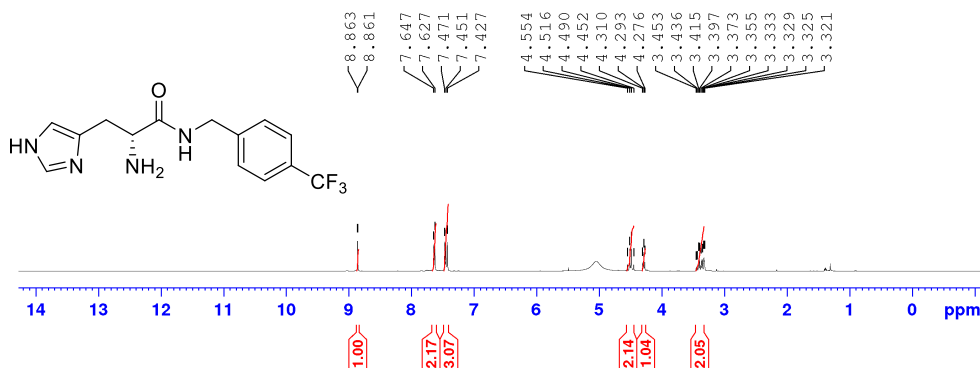

==== CHANNEL f1 =====  
 SF01 400.2821952 MHz  
 NUC1 1H  
 P1 10.86 usec  
 PLW1 17.00000000 W

F2 - Processing parameters  
 SI 131072  
 SF 400.2800000 MHz  
 WDW EM  
 SSB 0  
 LB 0.20 Hz  
 GB 0  
 PC 1.00

<sup>13</sup>C NMR (100 MHz, MeOH-d<sub>4</sub>), (R)-2-amino-3-(1H-imidazol-4-yl)-N-(4-(trifluoromethyl)benzyl)propanamide

(5i):

KS-102

C13CPD MeOD {C:\Bruker\TopSpin3.2\Iconnmr} PTLab 13

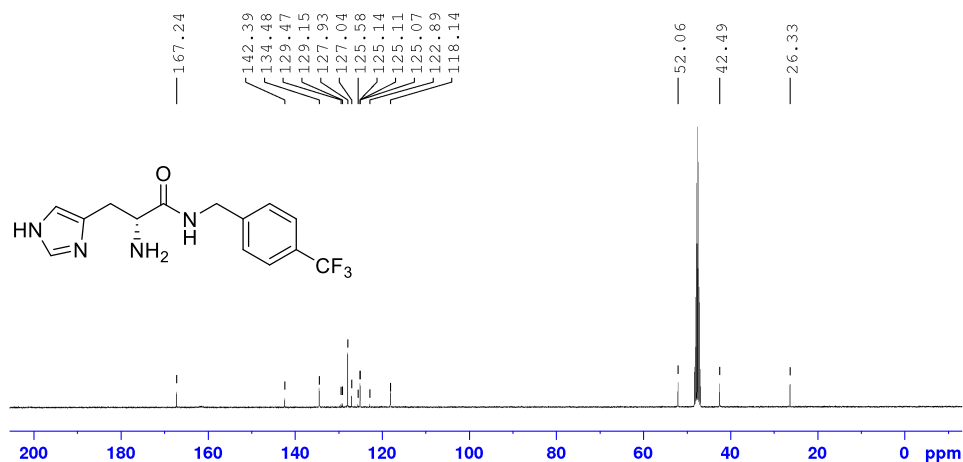

Current Data Parameters  
NAME Dec05-2020-PTLab  
EXPNO 220  
PROCNO 1

F2 - Acquisition Parameters  
Date\_ 20201206  
Time 2.55  
INSTRUM spect  
PROBHD 5 mm PABBO BB/  
PULPROG zgpg30  
TD 65536  
SOLVENT MeOD  
NS 1024  
DS 4  
SWH 24038.461 Hz  
FIDRES 0.366798 Hz  
AQ 1.3631488 sec  
RG 2050  
DW 20.800 usec  
DE 6.50 usec  
TE 300.1 K  
D1 2.0000000 sec  
D11 0.0300000 sec  
TD0 1

----- CHANNEL f1 -----  
SFO1 100.6605506 MHz  
NUC1 13C  
P1 11.00 usec  
PLW1 48.0000000 W

----- CHANNEL f2 -----  
SFO2 400.2816011 MHz  
NUC2 1H  
CPDPRG[2] waltz16  
PCPD2 90.00 usec  
PLW2 17.0000000 W  
PLW12 0.24753000 W  
PLW13 0.20050000 W

F2 - Processing parameters  
SI 32768  
SF 100.6504861 MHz  
WDW EM  
SSB 0  
LB 1.00 Hz  
GB 0  
PC 1.40

<sup>1</sup>H NMR (400 MHz, MeOH-d<sub>4</sub>), (S)-2-amino-3-(1H-imidazol-4-yl)-N-(2-(trifluoromethyl)benzyl)propanamide

(5j):

SR 74-1d  
zg30 MeOD {C:\Bruker\TopSpin3.2\Iconnmr} FTlab 6

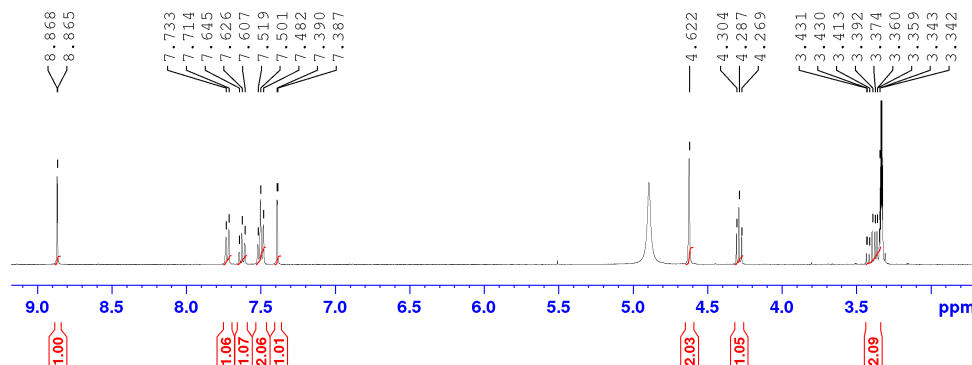

Current Data Parameters  
NAME Nov22-2020-FTlab  
EXPNO 80  
PROCNO 1

F2 - Acquisition Parameters  
Date\_ 20201122  
Time 17.54  
INSTRUM spect  
PROBHD 5 mm PABBO BB/  
PULPROG zg30  
TD 30046  
SOLVENT MeOD  
NS 16  
DS 1  
SWH 8012.820 Hz  
FIDRES 0.266685 Hz  
AQ 1.8748704 sec  
RG 256  
DW 62.400 usec  
DE 6.50 usec  
TE 300.1 K  
D1 6.0000000 sec  
TDO 1

==== CHANNEL f1 =====  
SFO1 400.2821952 MHz  
NUC1 1H  
P1 10.86 usec  
PLW1 17.0000000 W

F2 - Processing parameters  
SI 131072  
SF 400.2800000 MHz  
WDW EM  
SSB 0  
LB 0.20 Hz  
GB 0  
PC 1.00

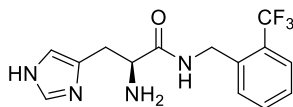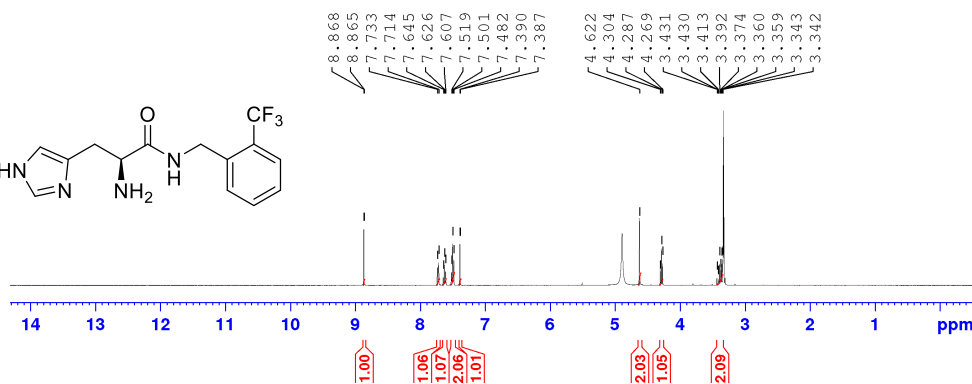

<sup>13</sup>C NMR (100 MHz, MeOH-d<sub>4</sub>), (S)-2-amino-3-(1H-imidazol-4-yl)-N-(2-(trifluoromethyl)benzyl)propanamide

(5j):

SR 74-1 d 13C  
Cl3CPD MeOD {C:\Bruker\TopSpin3.2\Iconnmr} PTLab 14

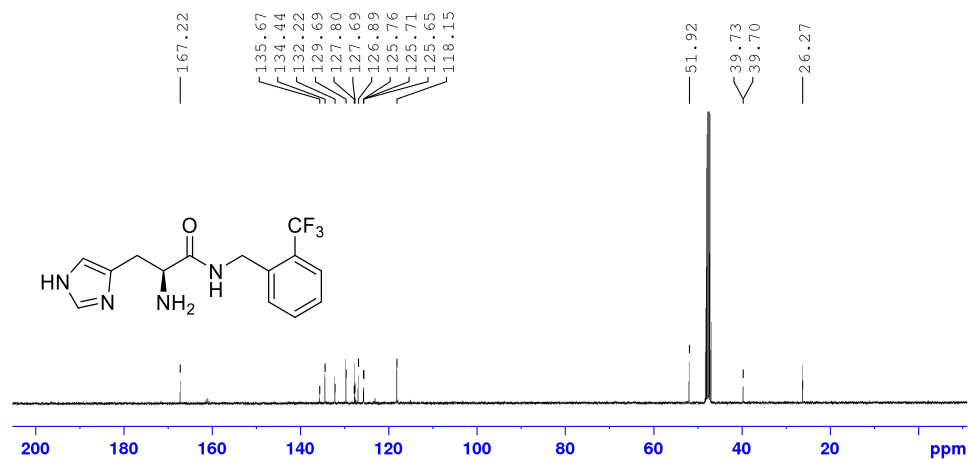

Current Data Parameters  
NAME Nov22-2020-PTLab  
EXFNO 130  
PROCNO 1

F2 - Acquisition Parameters  
Date\_ 20201122  
Time 21.33  
INSTRUM spect  
PROBHD 5 mm PABBO BB/  
PULPROG zgpg30  
TD 65536  
SOLVENT MeOD  
NS 512  
DS 4  
SWH 24038.461 Hz  
FIDRES 0.366798 Hz  
AQ 1.3631488 sec  
RG 2050  
DW 20.800 usec  
DE 6.50 usec  
TE 300.1 K  
DI 2.0000000 sec  
D11 0.03000000 sec  
TD0 1

==== CHANNEL f1 =====  
SFO1 100.6605506 MHz  
NUC1 13C  
P1 11.00 usec  
PLW1 48.0000000 W

==== CHANNEL f2 =====  
SFO2 400.2816011 MHz  
NUC2 1H  
CPDPRG2 waltz16  
PCPD2 90.00 usec  
PLW2 17.0000000 W  
PLW2 0.24753000 W  
PLW3 0.20080000 W

F2 - Processing parameters  
SI 32768  
SF 100.6504861 MHz  
WDM EM  
SSB 0  
LB 1.00 Hz  
GB 0  
PC 1.40



<sup>1</sup>H NMR (500 MHz, MeOH-d<sub>4</sub>), (R)-2-amino-3-(1H-imidazol-4-yl)-N-(2-(trifluoromethyl)benzyl)propanamide

(5k):

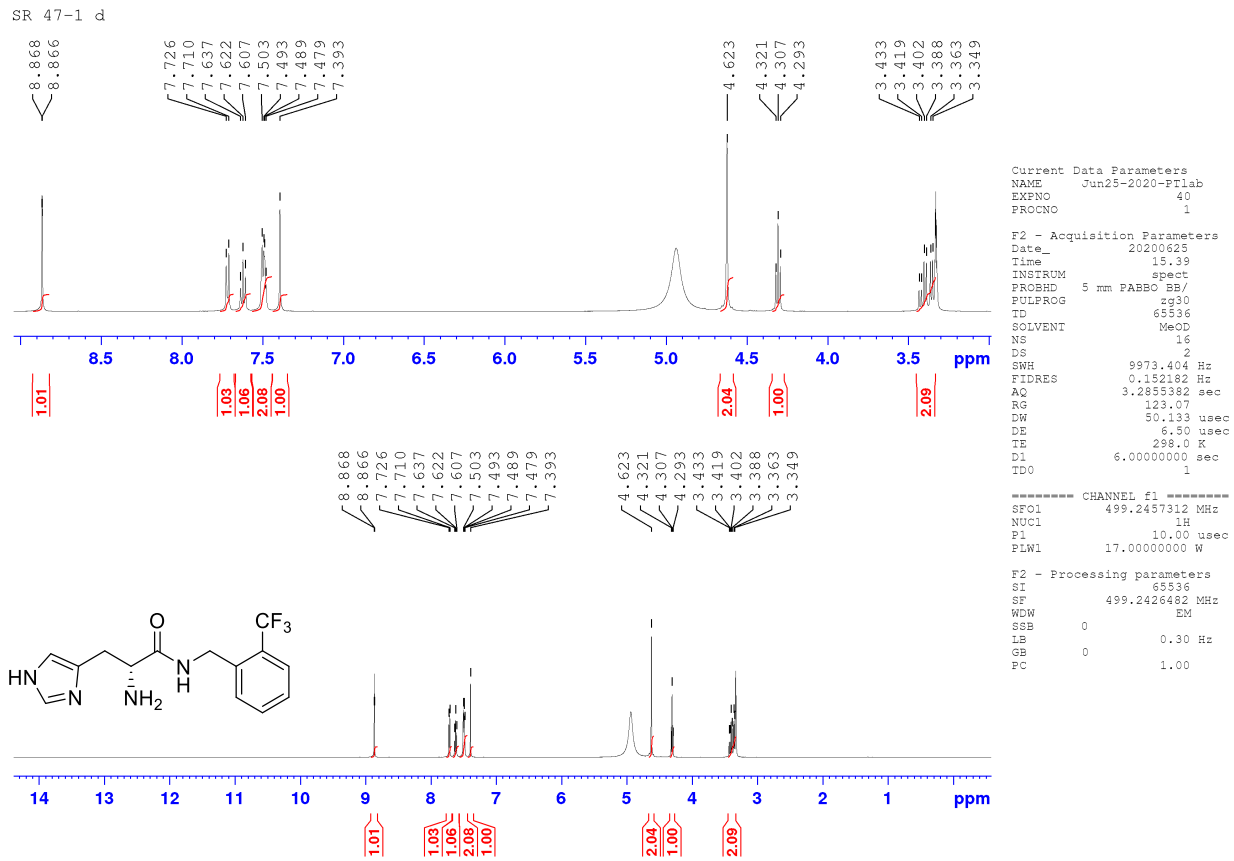

<sup>13</sup>C NMR (126 MHz, MeOH-d<sub>4</sub>), (R)-2-amino-3-(1H-imidazol-4-yl)-N-(2-(trifluoromethyl)benzyl)propanamide

(5k):

SR 47-1 d 13 c

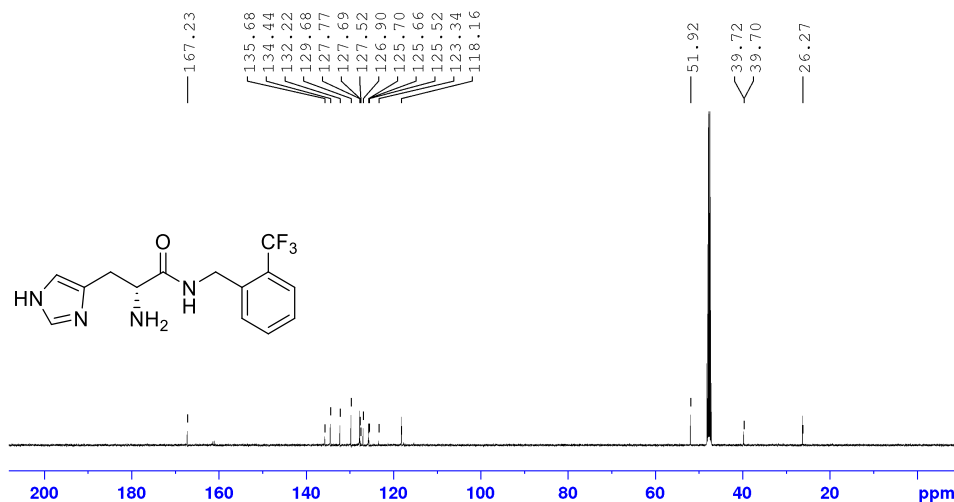

```
Current Data Parameters
NAME      Jun25-2020-PFlab
EXPNO     50
PROCNO    1

F2 - Acquisition Parameters
Date_     20200625
Time      16.02
INSTRUM   spect
PROBHD    5 mm PABBO BB/
PULPROG   zgpg30
ID        65536
SOLVENT   MeOD
NS        450
DS        4
SWH       29761.904 Hz
FIDRES    0.454131 Hz
AQ        1.1010048 sec
RG        191.52
DW        16.800 usec
DE        10.00 usec
TE        300.0 K
D1        2.0000000 sec
D11       0.0300000 sec
TDO       1

===== CHANNEL f1 =====
SFO1     125.5472166 MHz
NUC1     13C
P1       10.00 usec
PLW1     71.00000000 W

===== CHANNEL f2 =====
SFO2     499.2446452 MHz
NUC2     1H
CPCPRG[2] waltz16
PCPD2    80.00 usec
PLW2     17.00000000 W
PLW12    0.26563001 W
PLW13    0.17000000 W

F2 - Processing parameters
SI        32768
SF        125.5346637 MHz
WDW       EM
SSB       0
LB        1.00 Hz
GB        0
PC        1.40
```

<sup>1</sup>H NMR (400 MHz, MeOH-d<sub>4</sub>), (S)-2-amino-3-(1H-imidazol-4-yl)-N-(3-(trifluoromethyl)benzyl)propanamide

(51):

PSK-11  
zg30 MeOD {C:\Bruker\TopSpin3.2\Iconnmr} PTLab 2

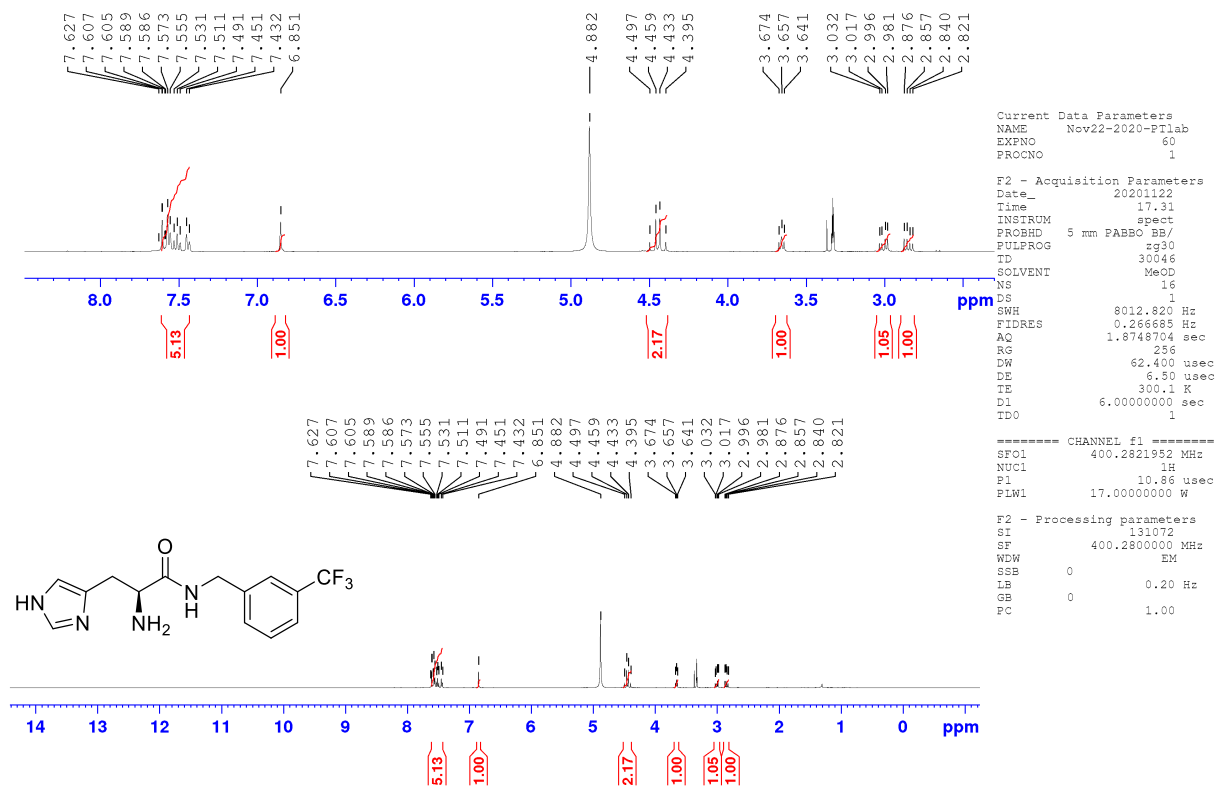

<sup>13</sup>C NMR (100 MHz, MeOH-d<sub>4</sub>), (S)-2-amino-3-(1H-imidazol-4-yl)-N-(3-(trifluoromethyl)benzyl)propanamide

(51):

PSK-11 Carbon  
zgpg30 MeOD {C:\Bruker\TopSpin3.2\Iconnmr} FTlab 9

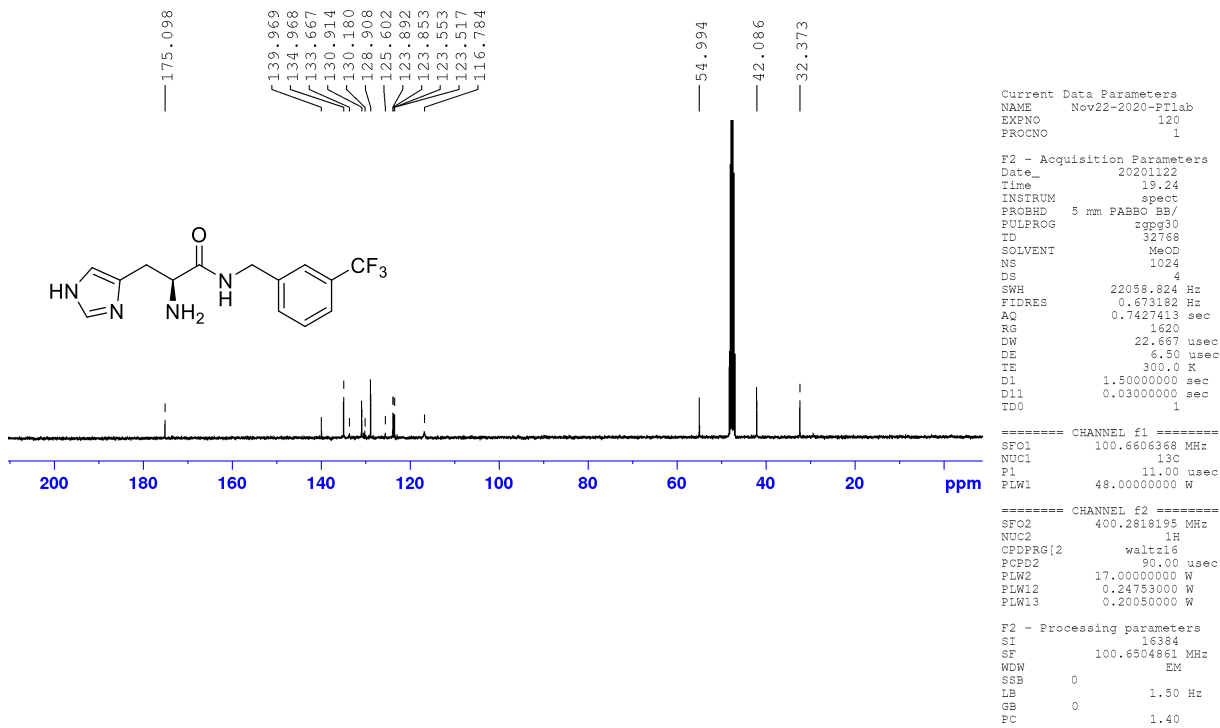

<sup>1</sup>H NMR (400 MHz, DMSO-d<sub>6</sub>), (*R*)-2-amino-3-(1*H*-imidazol-4-yl)-*N*-(3-(trifluoromethyl)benzyl)propanamide

(5m):

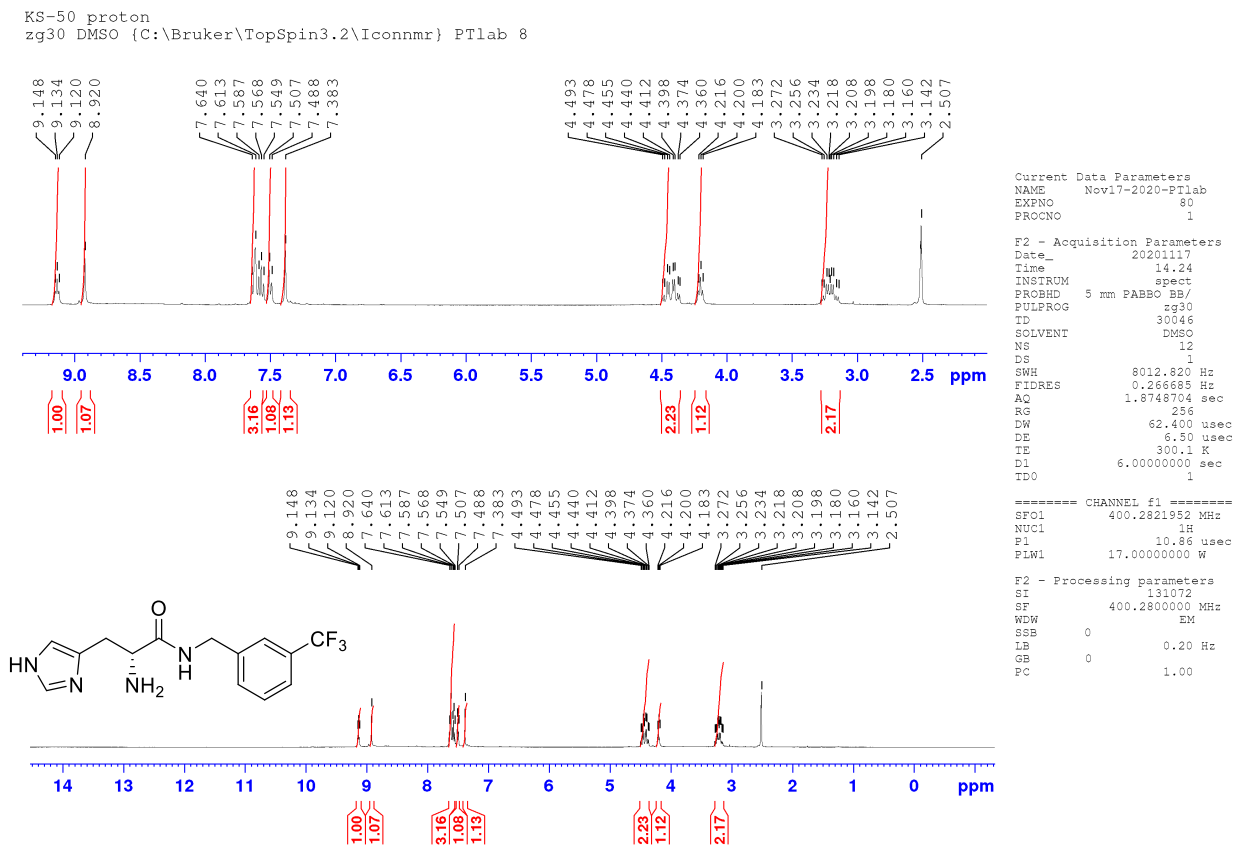

<sup>13</sup>C NMR (100 MHz, DMSO-d<sub>6</sub>), (*R*)-2-amino-3-(1*H*-imidazol-4-yl)-*N*-(3-(trifluoromethyl)benzyl)propanamide

(5m):

KS-50Carbon  
zgpg30 DMSO {C:\Bruker\TopSpin3.2\Iconnmr} PTLab 11

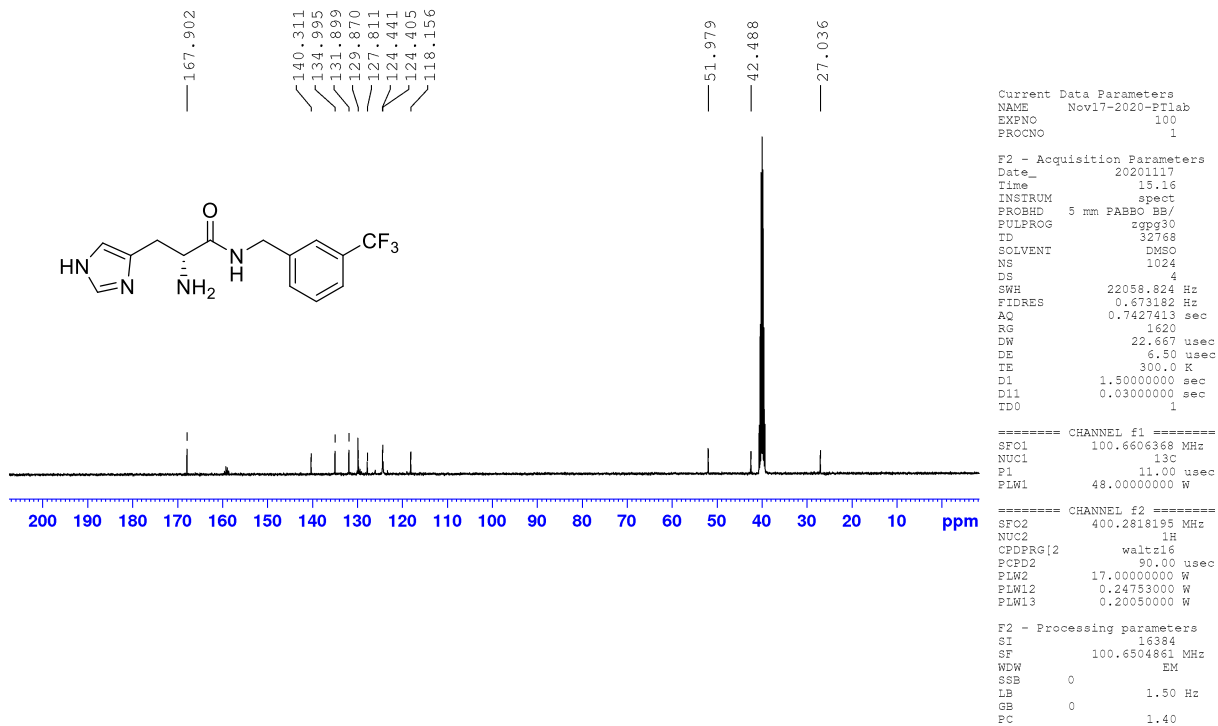

<sup>1</sup>H NMR (400 MHz, MeOH-d<sub>4</sub>), (S)-2-amino-N-(4-fluorobenzyl)-3-(1H-imidazol-4-yl)propanamide (**5n**):

PSK-13  
zg30 MeOD {C:\Bruker\TopSpin3.2\Iconnmr} PTLab 3

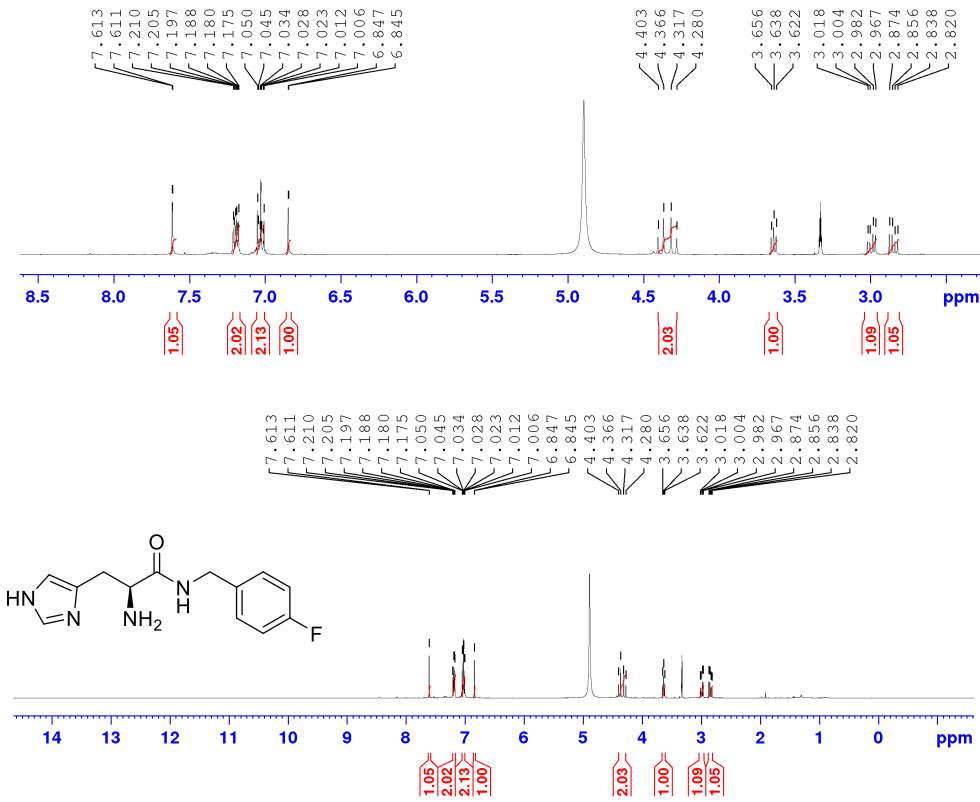

Current Data Parameters  
NAME Nov22-2020-PTLab  
EXPNO 70  
PROCNO 1

F2 - Acquisition Parameters  
Date\_ 20201122  
Time 17.39  
INSTRUM spect  
PROBHD 5 mm PABBO BB/  
PULPROG zg30  
TD 30046  
SOLVENT MeOD  
NS 16  
DS 1  
SWH 8012.820 Hz  
FIDRES 0.266685 Hz  
AQ 1.8748704 sec  
RG 128  
DW 62.400 usec  
DE 6.50 usec  
TE 300.2 K  
D1 6.00000000 sec  
TDC 1

===== CHANNEL f1 =====  
SFO1 400.2821952 MHz  
NUC1 1H  
P1 10.86 usec  
PLW1 17.00000000 W

F2 - Processing parameters  
SI 131072  
SF 400.2800000 MHz  
WDW EM  
SSB 0  
LB 0.20 Hz  
GB 0  
PC 1.00

<sup>13</sup>C NMR (100 MHz, MeOH-d<sub>4</sub>), (S)-2-amino-N-(4-fluorobenzyl)-3-(1H-imidazol-4-yl)propanamide (**5n**):

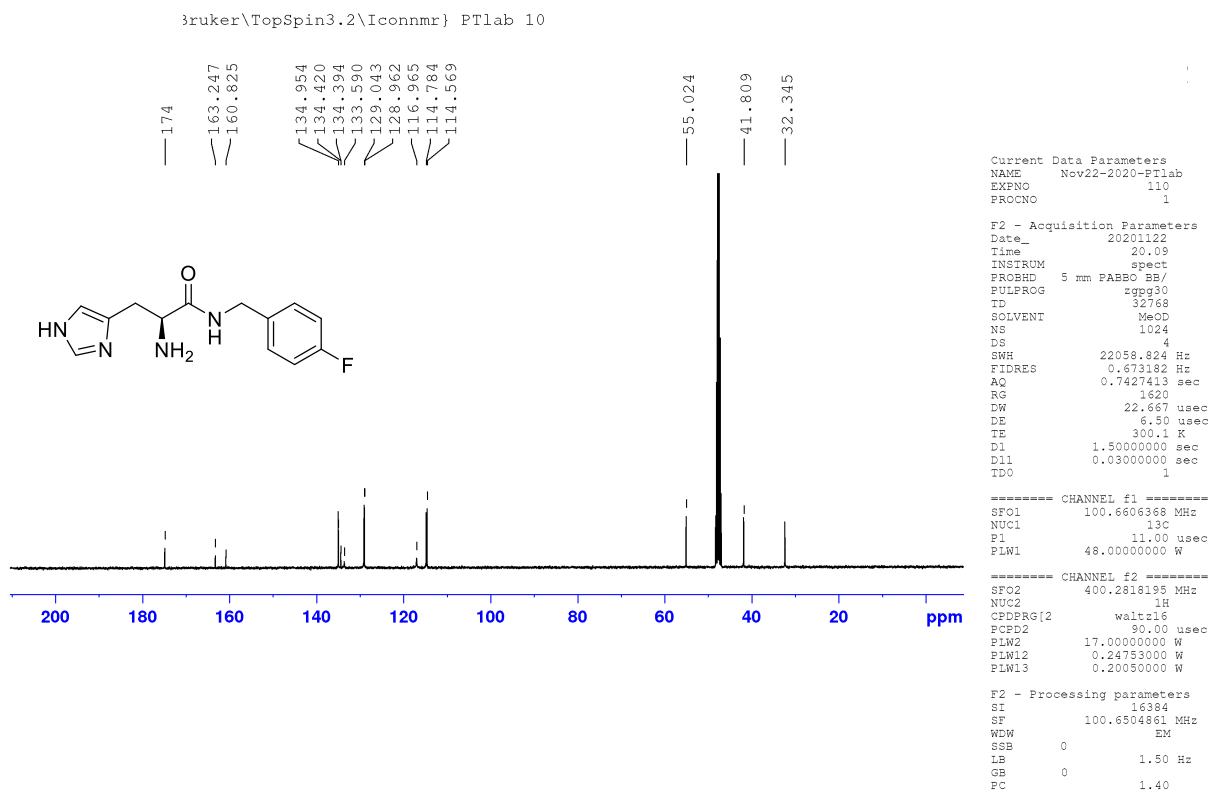



<sup>1</sup>H NMR (400 MHz, MeOH-d<sub>4</sub>), (R)-2-amino-N-(4-fluorobenzyl)-3-(1H-imidazol-4-yl)propanamide (**5o**):

KS-93d  
zg30 MeOD {C:\Bruker\TopSpin3.2\Iconnmr} PTLab 18

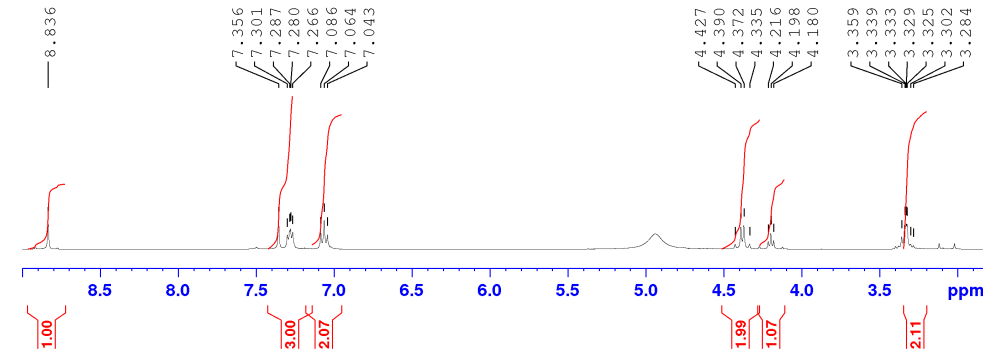

Current Data Parameters  
 NAME Nov30-2020-PTLab  
 EXPNO 40  
 PROCNO 1  
 F2 - Acquisition Parameters  
 Date\_ 20201130  
 Time 19:29  
 INSTRUM spect  
 PROBHD 5 mm PABBO BB/  
 PULPROG zg30  
 TD 30046  
 SOLVENT MeOD  
 NS 16  
 DS 1  
 SWH 8012.820 Hz  
 FIDRES 0.266685 Hz  
 AQ 1.8748704 sec  
 RG 256  
 DW 62.400 usec  
 DE 6.50 usec  
 TE 300.1 K  
 D1 6.00000000 sec  
 TDO 1  
 ===== CHANNEL f1 =====  
 SFO1 400.2821952 MHz  
 NUC1 1H  
 P1 10.86 usec  
 PLW1 17.00000000 W  
 F2 - Processing parameters  
 SI 131072  
 SF 400.2800000 MHz  
 WDW EM  
 SSB 0  
 LB 0.20 Hz  
 GB 0  
 PC 1.00

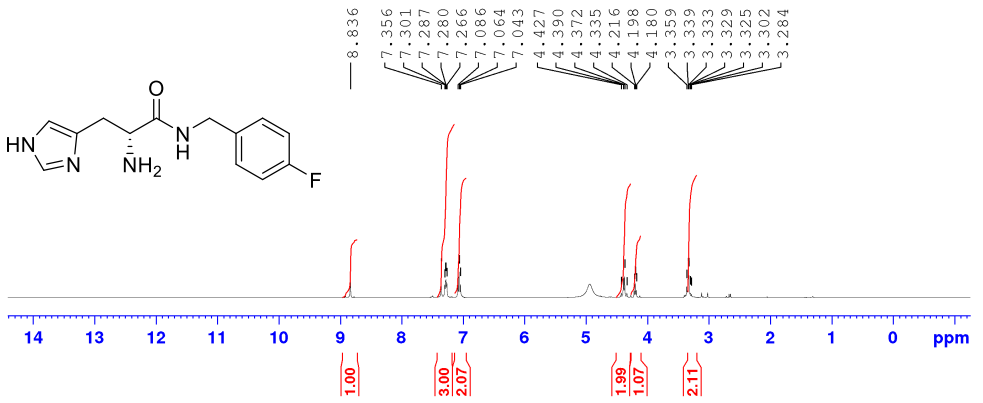

<sup>13</sup>C NMR (100 MHz, MeOH-d<sub>4</sub>), (R)-2-amino-N-(4-fluorobenzyl)-3-(1H-imidazol-4-yl)propanamide (**5o**):

KS-93-d Carbon  
C13CPD MeOD {C:\Bruker\TopSpin3.2\Iconnmr} PTLab 3

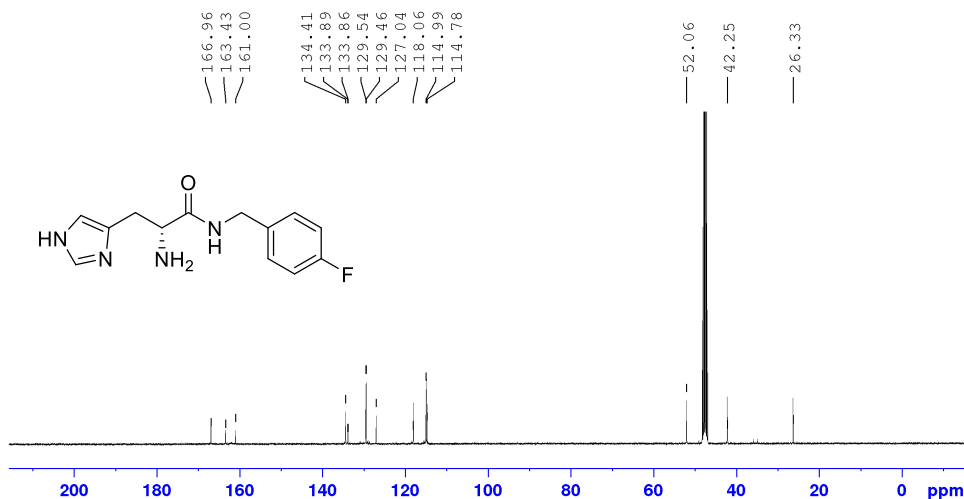

Current Data Parameters  
NAME Jan30-2021-PTLab  
EXPNO 70  
PROCNO 1

F2 - Acquisition Parameters  
Date\_ 20210130  
Time 15.48  
INSTRUM spect  
PROBHD 5 mm PABBO BB/  
PULPROG zgpg30  
TD 65536  
SOLVENT MeOD  
NS 1024  
DS 4  
SWH 24038.461 Hz  
FIDRES 0.366798 Hz  
AQ 1.3631488 sec  
RG 2050  
DW 20.800 usec  
DE 6.50 usec  
TE 300.1 K  
D1 2.0000000 sec  
D11 0.0300000 sec  
TDO 1

===== CHANNEL f1 =====  
SFO1 100.6605506 MHz  
NUC1 13c  
P1 11.00 usec  
PLW1 48.00000000 W

===== CHANNEL f2 =====  
SFO2 400.2816011 MHz  
NUC2 1H  
CPDPRG2 waltz16  
PCPD2 90.00 usec  
PLW2 17.00000000 W  
PLW12 0.24753000 W  
PLW13 0.20050000 W

F2 - Processing parameters  
SI 32768  
SF 100.6504861 MHz  
WDW EM  
SSB 0  
LB 1.00 Hz  
GB 0  
PC 1.40

<sup>1</sup>H NMR (400 MHz, MeOH-d<sub>4</sub>), (S)-2-amino-3-(1H-imidazol-4-yl)-N-(4-(trifluoromethoxy)benzyl)propanamide (**5p**):

PSK-5d  
zg30 MeOD {C:\Bruker\TopSpin3.2\Iconnmr} PTLab 14

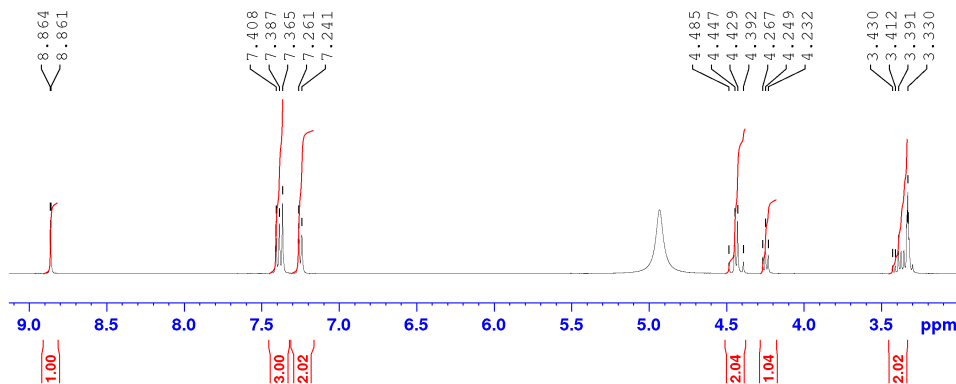

Current Data Parameters  
NAME Jan29-2021-PTLab  
EXPNO 120  
PROCNO 1

F2 - Acquisition Parameters  
Date\_ 20210129  
Time 18.26  
INSTRUM spect  
PROBHD 5 mm PABBO BB/  
PULPROG zg30  
TD 30046  
SOLVENT MeOD  
NS 16  
DS 1  
SWH 8012.820 Hz  
FIDRES 0.266685 Hz  
AQ 1.8748704 sec  
RG 256  
DW 62.400 usec  
DE 6.50 usec  
TE 300.1 K  
D1 6.00000000 sec  
TDO 1

===== CHANNEL f1 =====  
SF01 400.2821952 MHz  
NUC1 1H  
P1 10.86 usec  
PLW1 17.00000000 W

F2 - Processing parameters  
SI 131072  
SF 400.2800000 MHz  
WDW EM  
SSB 0  
LB 0.20 Hz  
GB 0  
PC 1.00

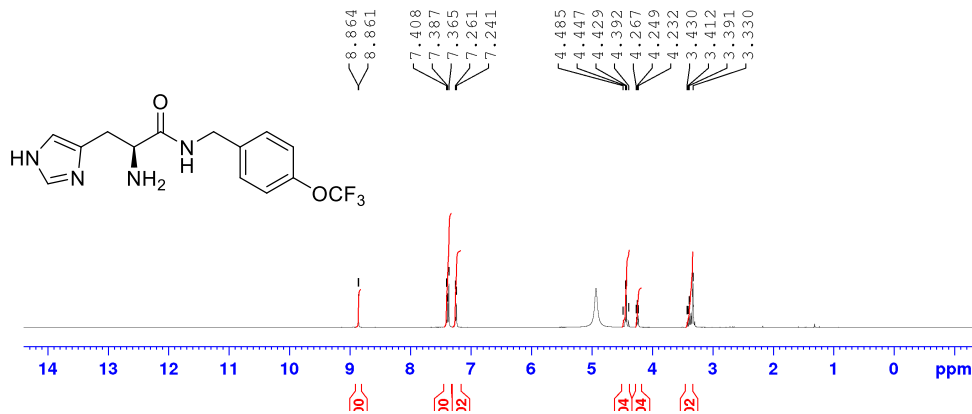

<sup>13</sup>C NMR (100 MHz, MeOH-d<sub>4</sub>), (S)-2-amino-3-(1*H*-imidazol-4-yl)-*N*-(4-(trifluoromethoxy)benzyl)propanamide (**5p**):

PSK-5d carbon  
 C13CPD MeOD {C:\Bruker\TopSpin3.2\Iconnmr} PT1lab 14

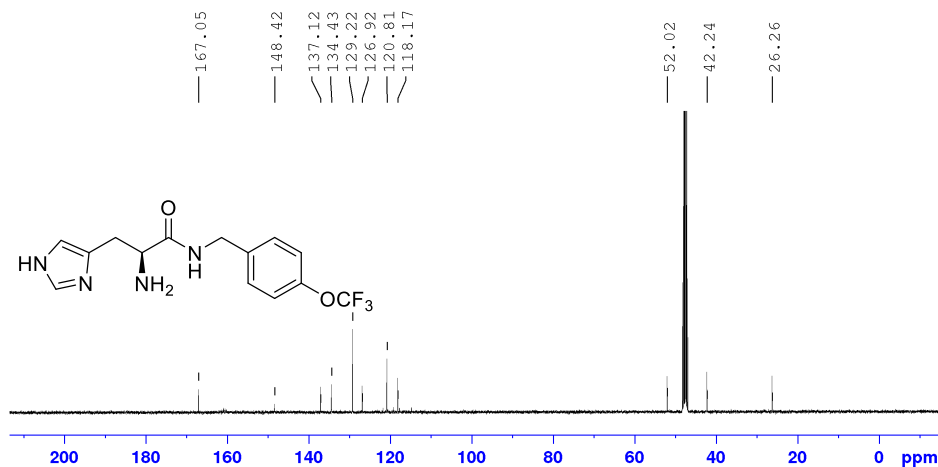

```

Current Data Parameters
NAME      Jan29-2021-PT1lab
EXPNO    121
PROCNO   1

F2 - Acquisition Parameters
Date_    20210129
Time     19.04
INSTRUM  spect
PROBHD   5 mm PABBO BB/
PULPROG  zgpg30
TD       65536
SOLVENT  MeOD
NS       526
DS       4
SWH      24038.461 Hz
FIDRES   0.366798 Hz
AQ       1.3631488 sec
RG       2050
DW       20.800 usec
DE       6.50 usec
TE       300.1 K
D1       2.0000000 sec
D11      0.0300000 sec
TD0      1

===== CHANNEL f1 =====
SFO1    100.6605506 MHz
NUC1     13C
P1      11.00 usec
PLW1    48.0000000 W

===== CHANNEL f2 =====
SFO2    400.2816011 MHz
NUC2     1H
PCPD2   waltz16
PCPD2   90.00 usec
PLW2    17.0000000 W
PLW2    0.24753000 W
PLW3    0.20050000 W

F2 - Processing parameters
SI      32768
SF      100.6504861 MHz
WDW     EM
SSB     0
LB      1.00 Hz
GB      0
PC      1.40
  
```

<sup>1</sup>H NMR (400 MHz, MeOH-d<sub>4</sub>), (*R*)-2-amino-3-(1*H*-imidazol-4-yl)-*N*-(4-(trifluoromethoxy)benzyl)propanamide

(5q):

KS-99  
zg30 MeOD {C:\Bruker\TopSpin3.2\Iconnmr} PTLab 6

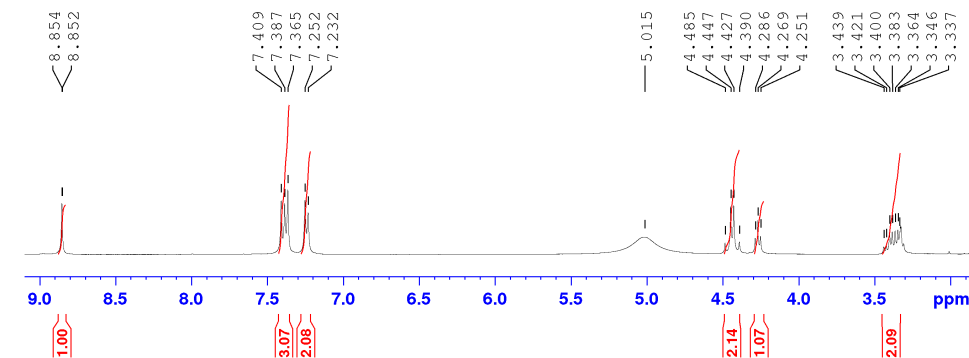

```

Current Data Parameters
NAME      Nov23-2020-PTLab
EXPNO    20
PROCNO   1

F2 - Acquisition Parameters
Date_    20201123
Time     13.11
INSTRUM  spect
PROBHD   5 mm PABBO BB/
PULPROG  zg30
TD       30046
SOLVENT  MeOD
NS       16
DS       1
SWH      8012.820 Hz
FIDRES   0.266685 Hz
AQ       1.8748704 sec
RG       114
DW       62.400 usec
DE       6.50 usec
TE       300.1 K
D1       6.00000000 sec
TD0      1

===== CHANNEL f1 =====
SFO1    400.2821952 MHz
NUC1    1H
P1      10.86 usec
PLW1    17.00000000 W

F2 - Processing parameters
SI      131072
SF      400.2800000 MHz
WDW     EM
SSB     0
LB      0.20 Hz
GB      0
PC      1.00
    
```

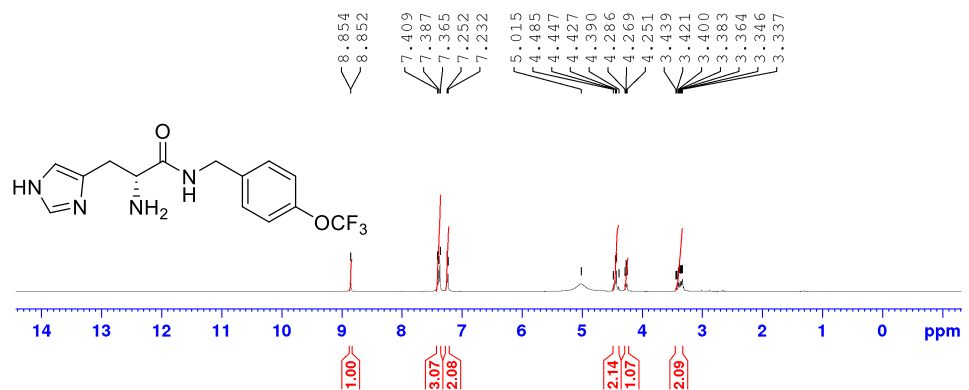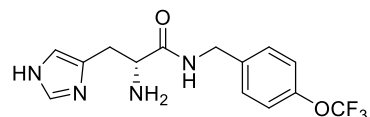

<sup>13</sup>C NMR (100 MHz, MeOH-d<sub>4</sub>), (R)-2-amino-3-(1H-imidazol-4-yl)-N-(4-(trifluoromethoxy)benzyl)propanamide

(5q):

KS-99 carbon  
zgpg30 MeOD {C:\Bruker\TopSpin3.2\Iconnmr} PTLab 6

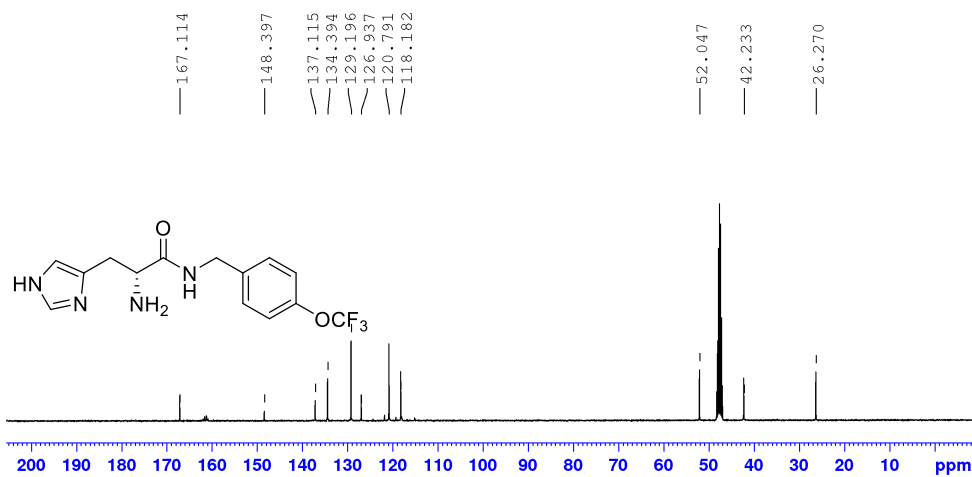

Current Data Parameters  
NAME Nov23-2020-PTLab  
EXPNO 21  
PROCNO 1

F2 - Acquisition Parameters  
Date\_ 20201123  
Time 13.58  
INSTRUM spect  
PROBHD 5 mm PABBO BB/  
PULPROG zgpg30  
TD 32768  
SOLVENT MeOD  
NS 1024  
DS 4  
SWH 22058.824 Hz  
FIDRES 0.673182 Hz  
AQ 0.7427413 sec  
RG 1620  
DW 22.667 usec  
DE 6.50 usec  
TE 300.1 K  
D1 1.5000000 sec  
D11 0.0300000 sec  
TDO 1

==== CHANNEL f1 =====  
SFO1 100.6606368 MHz  
NUC1 13C  
P1 11.00 usec  
PLW1 48.0000000 W

==== CHANNEL f2 =====  
SFO2 400.2818195 MHz  
NUC2 1H  
CPDPRG[2] waltz16  
PCPD2 90.00 usec  
PLW2 17.0000000 W  
PLW12 0.24753000 W  
PLW13 0.20050000 W

F2 - Processing parameters  
SI 16384  
SF 100.6504861 MHz  
WDW EM  
SSB 0  
LB 1.50 Hz  
GB 0  
FC 1.40

<sup>1</sup>H NMR (500 MHz, MeOH-d<sub>4</sub>), (S)-2-amino-3-(1H-imidazol-4-yl)-N-(4-

((trifluoromethyl)thio)benzyl)propanamide (**5r**):

SR 25-1 d

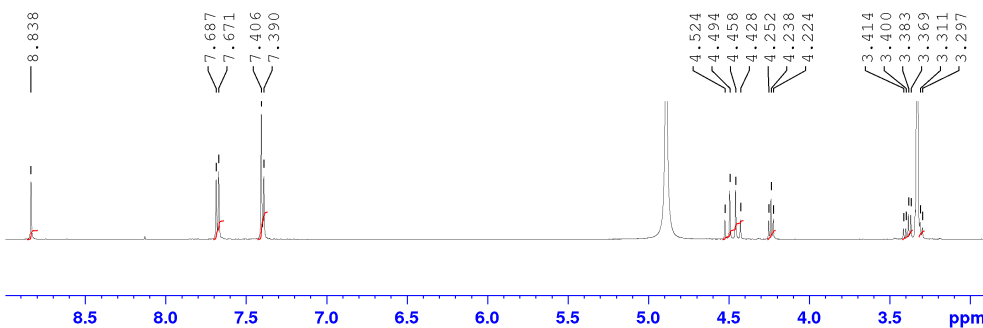

Current Data Parameters  
NAME Oct16-2019-Flab  
EXPNO 10  
PROCNO 1  
F2 - Acquisition Parameters  
Date\_ 20191016  
Time 14.44  
INSTRUM spect  
PROBHD 5 mm PABBO BB/  
PULPROG zg30  
TD 65536  
SOLVENT MeOD  
NS 16  
DS 2  
SWH 9973.404 Hz  
FIDRES 0.152182 Hz  
AQ 3.285532 sec  
RG 491.52  
DW 50.133 usec  
DE 6.50 usec  
TE 298.0 K  
D1 6.00000000 sec  
TDO 1

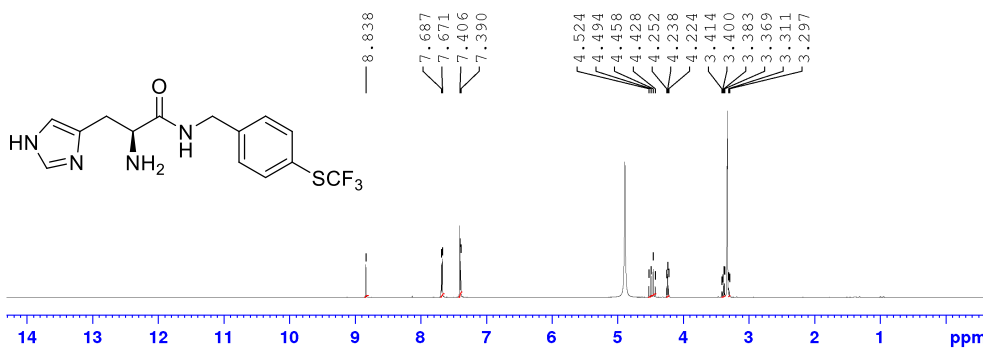

----- CHANNEL f1 -----  
SFO1 499.2621482 MHz  
NUC1 1H  
P1 10.00 usec  
PLW1 17.00000000 W  
F2 - Processing parameters  
SI 65536  
SF 499.2590651 MHz  
WDW EM  
SSB 0  
LB 0.30 Hz  
GB 0  
PC 1.00

<sup>13</sup>C NMR (126 MHz, MeOH-d<sub>4</sub>), (S)-2-amino-3-(1H-imidazol-4-yl)-N-(4-

((trifluoromethyl)thio)benzyl)propanamide (**5r**):

SR 25-1 d 13c

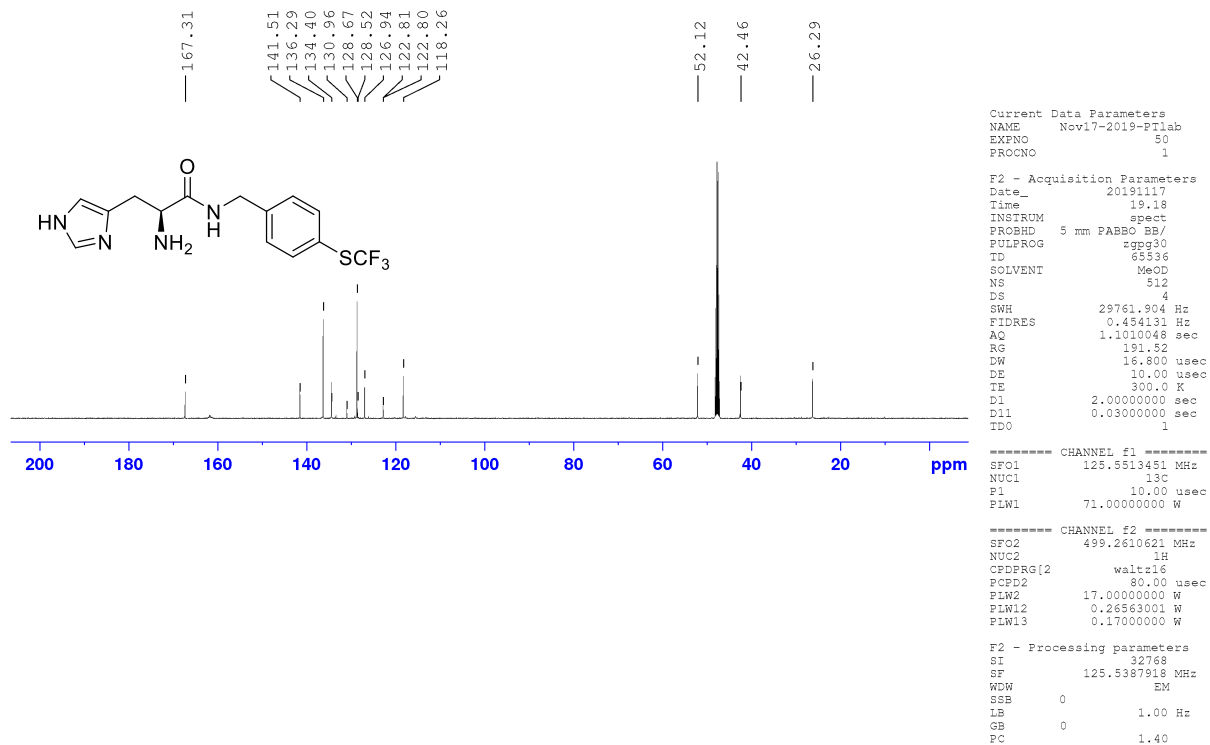



<sup>1</sup>H NMR (500 MHz, MeOH-d<sub>4</sub>), (*R*)-2-amino-3-(1*H*-imidazol-4-yl)-*N*-(4-(trifluoromethyl)thio)benzyl)propanamide (**5s**):

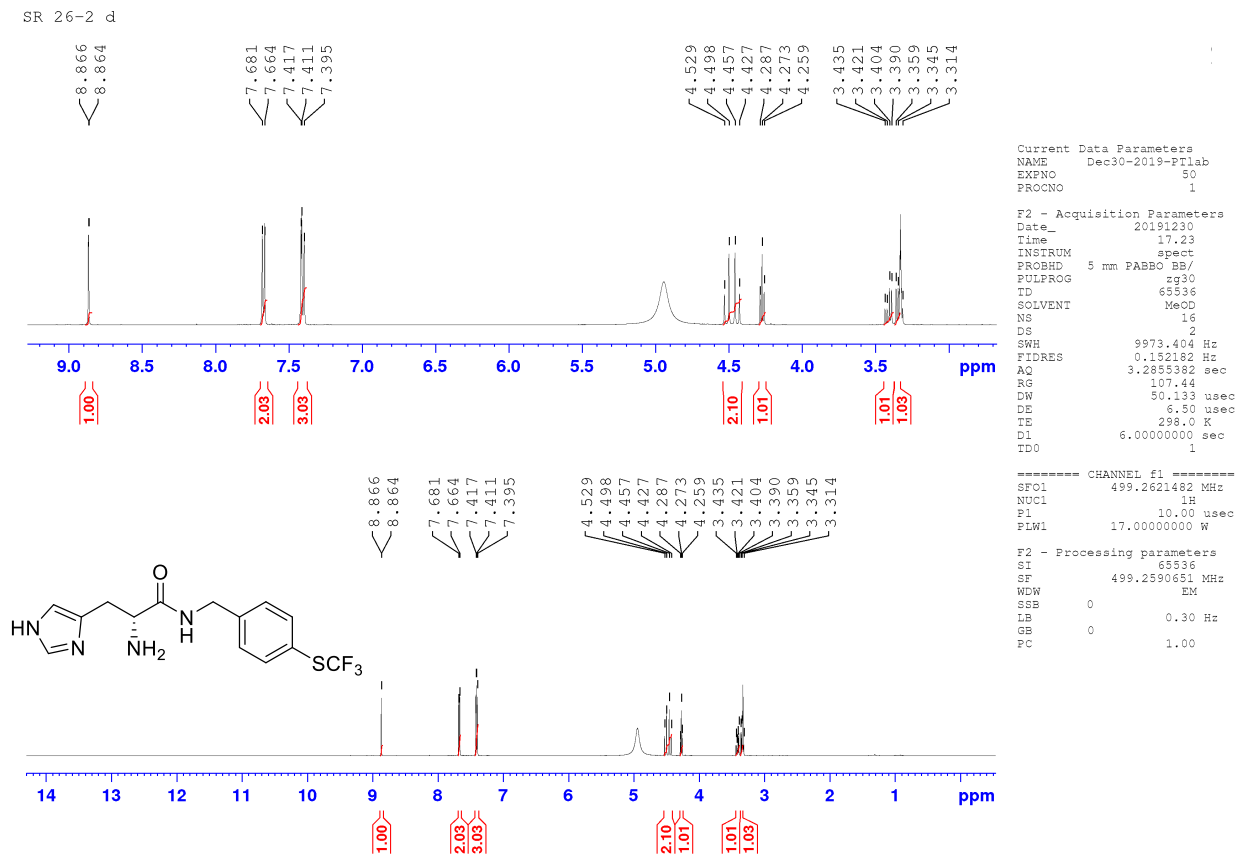

<sup>13</sup>C NMR (126 MHz, MeOH-d<sub>4</sub>), (*R*)-2-amino-3-(1*H*-imidazol-4-yl)-*N*-(4-((trifluoromethyl)thio)benzyl)propanamide (**5s**):

SR 26-2 d 13C

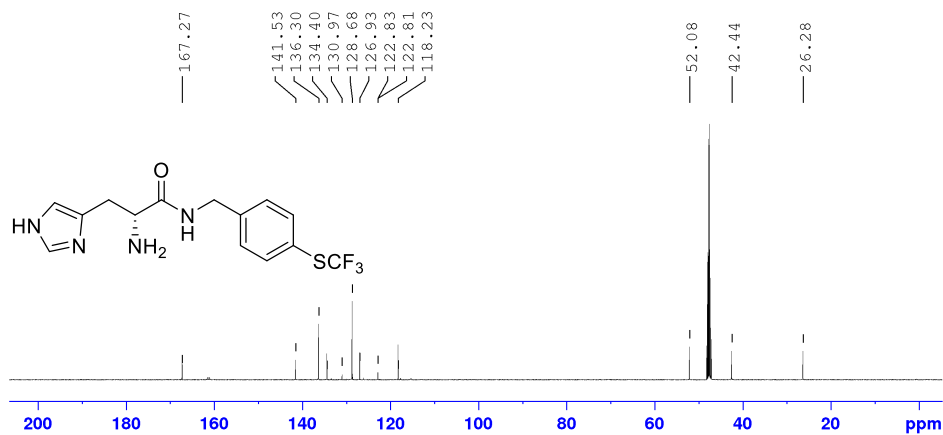

```

Current Data Parameters
NAME      Dec30-2019-Flab
EXPNO    60
PROCNO   1

F2 - Acquisition Parameters
Date_    20191230
Time     18.22
INSTRUM  spect
PROBHD   5 mm PABBO BB/
PULPROG  zgpg30
TD       65536
SOLVENT  MeOD
NS       512
DS       4
SWH      29761.904 Hz
FIDRES   0.454131 Hz
AQ       1.1010048 sec
RG       191.52
DW       16.800 usec
DE       10.00 usec
TE       300.0 K
D1       2.0000000 sec
D11      0.0300000 sec
TDO      1

===== CHANNEL f1 =====
SFO1    125.5513451 MHz
NUC1     13C
P1       10.00 usec
PLW1     71.00000000 W

===== CHANNEL f2 =====
SFO2    499.2610621 MHz
NUC2     1H
CPDPRG2  waltz16
PCPD2    80.00 usec
PLW2     17.00000000 W
PLW12    0.26563001 W
PLW13    0.17000000 W

F2 - Processing parameters
SI       32768
SF       125.5387918 MHz
WDW      EM
SSB      0
LB       1.00 Hz
GB       0
PC       1.40
    
```

<sup>1</sup>H NMR (400 MHz, MeOH-d<sub>4</sub>), (S)-2-amino-3-(1H-imidazol-4-yl)-N-phenylpropanamide (**6a**):

SR 73-1 d  
zg30 MeOD {C:\Bruker\TopSpin3.2\Iconnmr} PTLab 7

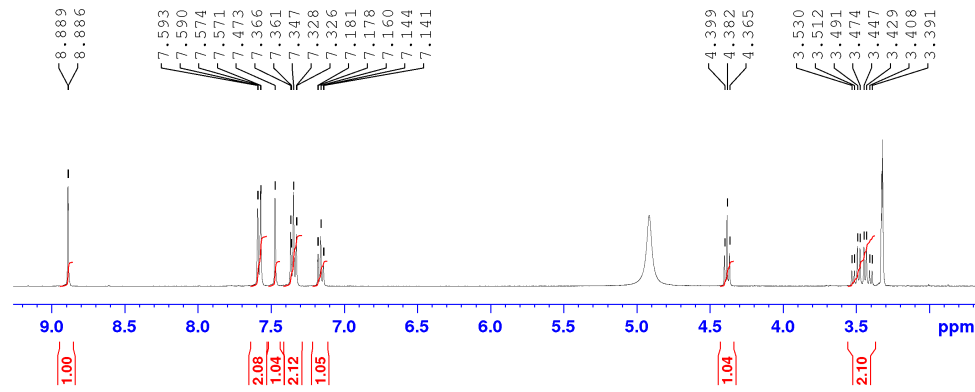

```
Current Data Parameters
NAME      Nov21-2020-PTLab
EXPNO    10
PROCNO   1

F2 - Acquisition Parameters
Date_    20201121
Time     15:17
INSTRUM  spect
PROBHD   5 mm PABBO BB/
PULPROG  zg30
ID       30046
SOLVENT  MeOD
NS       16
DS       1
SWH      8012.820 Hz
FIDRES   0.266685 Hz
AQ       1.8748704 sec
RG       256
DW       62.400 usec
DE       6.50 usec
TE       300.1 K
D1       6.00000000 sec
TDO      1

===== CHANNEL f1 =====
SF01    400.2821952 MHz
NUC1     1H
P1       10.86 usec
PLW1    17.00000000 W

F2 - Processing parameters
SI       131072
SF       400.2793692 MHz
WDW      EM
SSB      0
LB       0.20 Hz
GB       0
PC       1.00
```

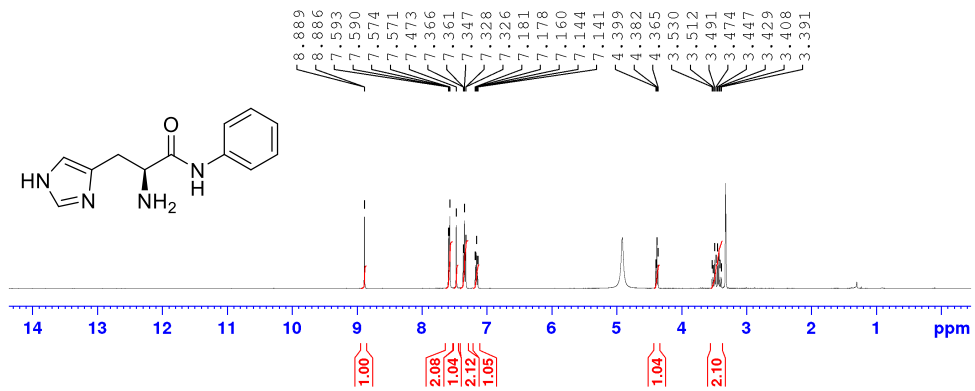

<sup>13</sup>C NMR (100 MHz, MeOH-d<sub>4</sub>), (S)-2-amino-3-(1H-imidazol-4-yl)-N-phenylpropanamide (6a):

SR 73-1 d 13C  
C13CPD MeOD {C:\Bruker\TopSpin3.2\Iconnmr} PTLab 7

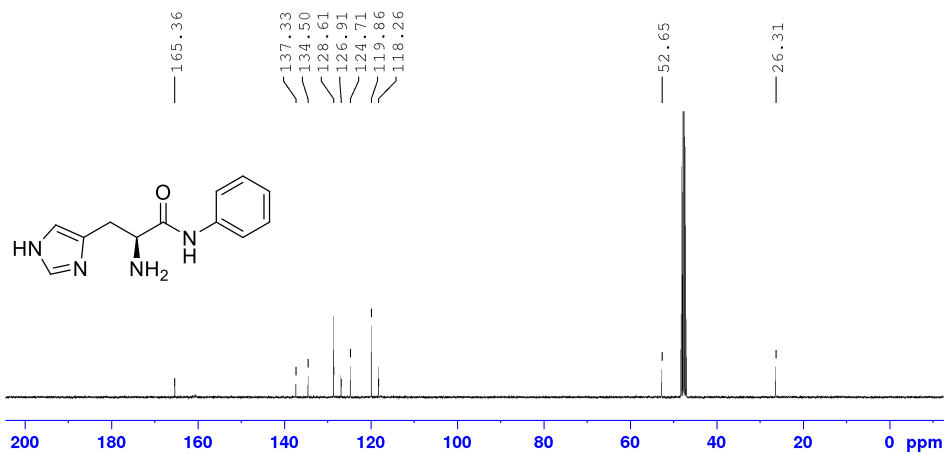

```
Current Data Parameters
NAME      Nov21-2020-PTLab
EXPNO    20
PROCNO    1

F2 - Acquisition Parameters
Date_     20201121
Time      15.58
INSTRUM   spect
PROBHD    5 mm PABBO BB/
PULPROG   zgpg30
TD         65536
SOLVENT   MeOD
NS         512
DS         4
SWH        24038.461 Hz
FIDRES     0.366798 Hz
AQ         1.3631488 sec
RG         2050
DW         20.800 usec
DE         6.50 usec
TE         300.0 K
D1         2.0000000 sec
D11        0.0300000 sec
TD0        1

===== CHANNEL f1 =====
SFO1      100.6605506 MHz
NUC1       13C
P1         11.00 usec
PLW1       48.0000000 W

===== CHANNEL f2 =====
SFO2      400.2816011 MHz
NUC2       1H
CPDPRG[2] waltz16
PCPD2      90.00 usec
PLW2       17.0000000 W
PLW12      0.24753000 W
PLW13      0.20050000 W

F2 - Processing parameters
SI         32768
SF         100.6504861 MHz
WDW        EM
SSB        0
LB         1.00 Hz
GB         0
PC         1.40
```

<sup>1</sup>H NMR (400 MHz, MeOH-d<sub>4</sub>), (*R*)-2-amino-3-(1*H*-imidazol-4-yl)-*N*-phenylpropanamide (**6b**):

SR 72-1 d  
zg30 MeOD {C:\Bruker\TopSpin3.2\Iconnmr} PTLab 24

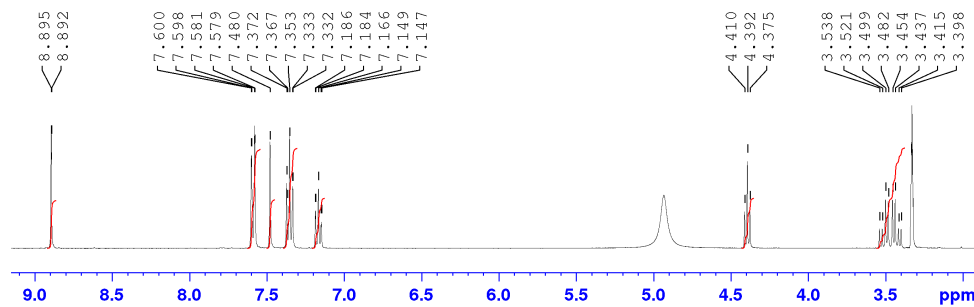

Current Data Parameters  
 NAME Nov20-2020-PTLab  
 EXPNO 60  
 PROCNO 1

F2 - Acquisition Parameters  
 Date\_ 20201120  
 Time 15.16  
 INSTRUM spect  
 PROBHD 5 mm PABBO BB/  
 PULPROG zg30  
 ID 30046  
 SOLVENT MeOD  
 NS 16  
 DS 1  
 SWH 8012.820 Hz  
 FIDRES 0.266685 Hz  
 AQ 1.8748704 sec  
 RG 256  
 DW 62.400 usec  
 DE 6.50 usec  
 TE 300.0 K  
 D1 6.00000000 sec  
 TDO 1

===== CHANNEL f1 =====  
 SF01 400.2821952 MHz  
 NUC1 1H  
 P1 10.86 usec  
 PLW1 17.00000000 W

F2 - Processing parameters  
 SI 131072  
 SF 400.2793607 MHz  
 WDW EM  
 SSB 0  
 LB 0.20 Hz  
 GB 0  
 PC 1.00

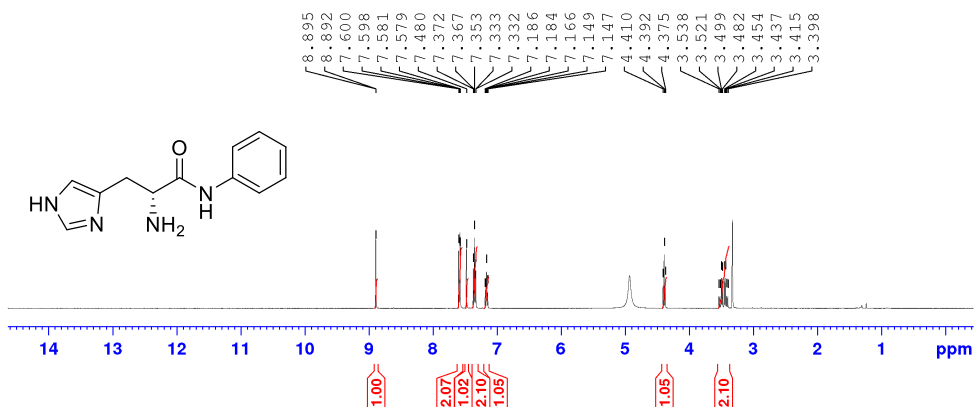

<sup>13</sup>C NMR (100 MHz, MeOH-d<sub>4</sub>), (R)-2-amino-3-(1H-imidazol-4-yl)-N-phenylpropanamide (**6b**):

SR 72-1 d 13C  
C13CPD MeOD {C:\Bruker\TopSpin3.2\Iconnmr} PTLab 7

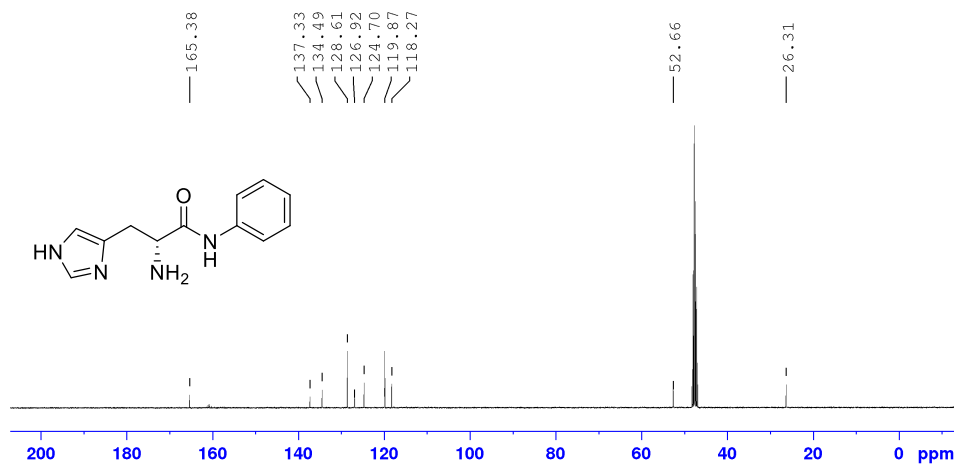

```
Current Data Parameters
NAME      Nov20-2020-PTlab
EXPNO    100
PROCNO   1

F2 - Acquisition Parameters
Date_    20201120
Time     17.54
INSTRUM  spect
PROBHD   5 mm PABBO BB/
PULPROG  zgpg30
TD       65536
SOLVENT  MeOD
NS       512
DS       4
SWH      24038.461 Hz
FIDRES   0.366798 Hz
AQ       1.3631488 sec
RG       2050
DW       20.800 usec
DE       6.50 usec
TE       300.0 K
D1       2.0000000 sec
D11      0.0300000 sec
TDO      1

===== CHANNEL f1 =====
SFO1    100.6605506 MHz
NUC1    13C
P1      11.00 usec
PLW1    48.0000000 W

===== CHANNEL f2 =====
SFO2    400.2816011 MHz
NUC2    1H
CPDPRG2 waltz16
PCPD2   90.00 usec
PLW2    17.0000000 W
PLW12   0.24753000 W
PLW13   0.20050000 W

F2 - Processing parameters
SI      32768
SF      100.6504861 MHz
WDW     EM
SSB     0
LB      1.00 Hz
GB      0
PC      1.40
```

<sup>1</sup>H NMR (500 MHz, MeOH-d<sub>4</sub>), (S)-2-amino-3-(1H-imidazol-4-yl)-N-(3-phenylpropyl)propanamide (**7a**):

SR 27-1 d 2

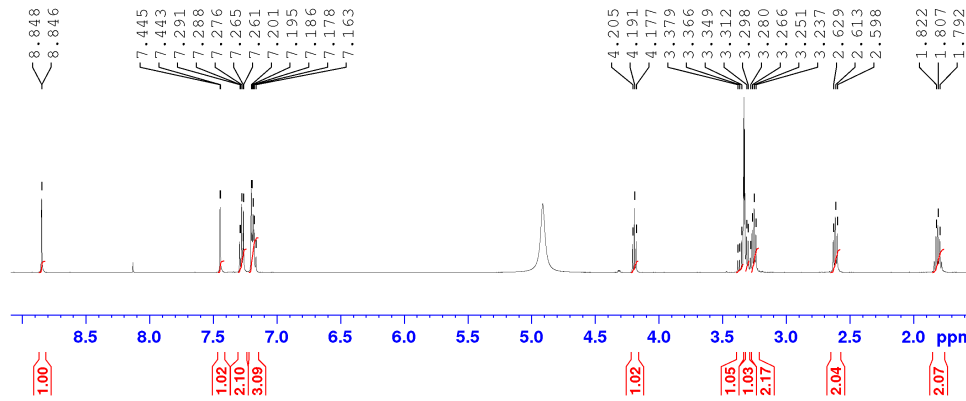

Current Data Parameters  
 NAME Oct31-2019-PTlab  
 EXPNO 20  
 PROCNO 1  
 F2 - Acquisition Parameters  
 Date\_ 20191031  
 Time 13.55  
 INSTRUM spect  
 PROBHD 5 mm PABBO BB/  
 PULPROG zg30  
 ID 65536  
 SOLVENT MeOD  
 NS 16  
 DS 2  
 SWH 9973.404 Hz  
 FIDRES 0.152182 Hz  
 AQ 3.2855382 sec  
 RG 137.94  
 DW 50.133 usec  
 DE 6.50 usec  
 TE 298.0 K  
 D1 6.00000000 sec  
 TDO 1

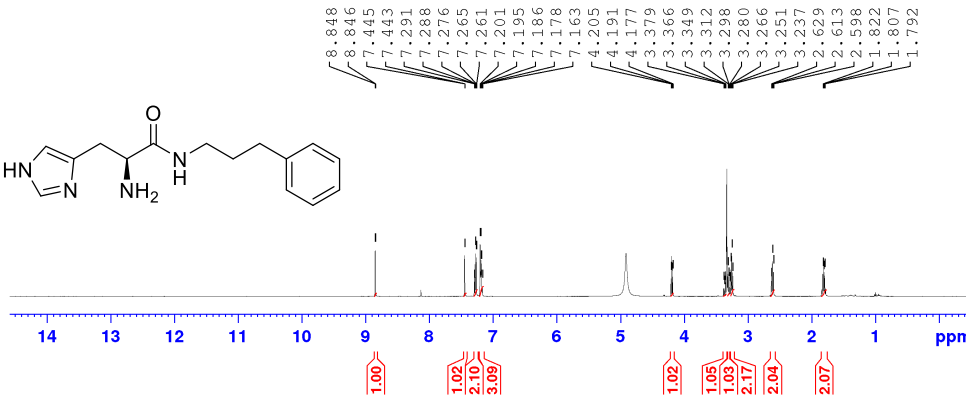

==== CHANNEL f1 =====  
 SFO1 499.2621482 MHz  
 NUC1 1H  
 P1 10.00 usec  
 PLM1 17.00000000 W  
 F2 - Processing parameters  
 SI 65536  
 SF 499.2590651 MHz  
 WDW EM  
 SSB 0  
 LB 0.30 Hz  
 GB 0  
 PC 1.00

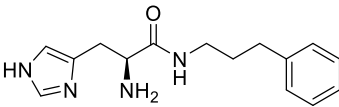

<sup>13</sup>C NMR (126 MHz, MeOH-d<sub>4</sub>), (S)-2-amino-3-(1H-imidazol-4-yl)-N-(3-phenylpropyl)propanamide (**7a**):

SR 27-1 d 13C

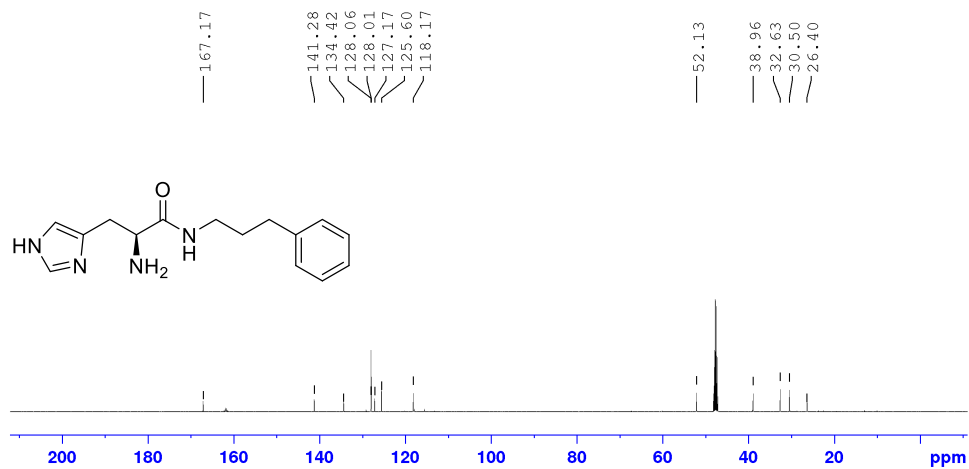

```
Current Data Parameters
NAME      Nov17-2019-FlLab
EXPNO    60
PROCNO   1

F2 - Acquisition Parameters
Date_    20191117
Time     19.49
INSTRUM  spect
PROBHD   5 mm PABBO BB/
PULPROG  zgpg30
TD       65536
SOLVENT  MeOD
NS       512
DS       4
SWH      29761.904 Hz
FIDRES   0.454131 Hz
AQ       1.1010048 sec
RG       191.52
DW       16.900 usec
DE       10.00 usec
TE       300.0 K
D1       2.00000000 sec
D11      0.03000000 sec
TD0      1

===== CHANNEL f1 =====
SFO1    125.5513451 MHz
NUC1    13C
P1      10.00 usec
PLW1    71.00000000 W

===== CHANNEL f2 =====
SFO2    499.2610621 MHz
NUC2    1H
CPDPRG2 waltz16
PCPD2   80.00 usec
PLW2    17.00000000 W
PLW12   0.26563001 W
PLW13   0.17000000 W

F2 - Processing parameters
SI      32768
SF      125.5387918 MHz
WDW     EM
SSB     0
LB      1.00 Hz
GB      0
PC      1.40
```



<sup>1</sup>H NMR (500 MHz, MeOH-d<sub>4</sub>), (*R*)-2-amino-3-(1*H*-imidazol-4-yl)-*N*-(3-phenylpropyl)propanamide (**7b**):

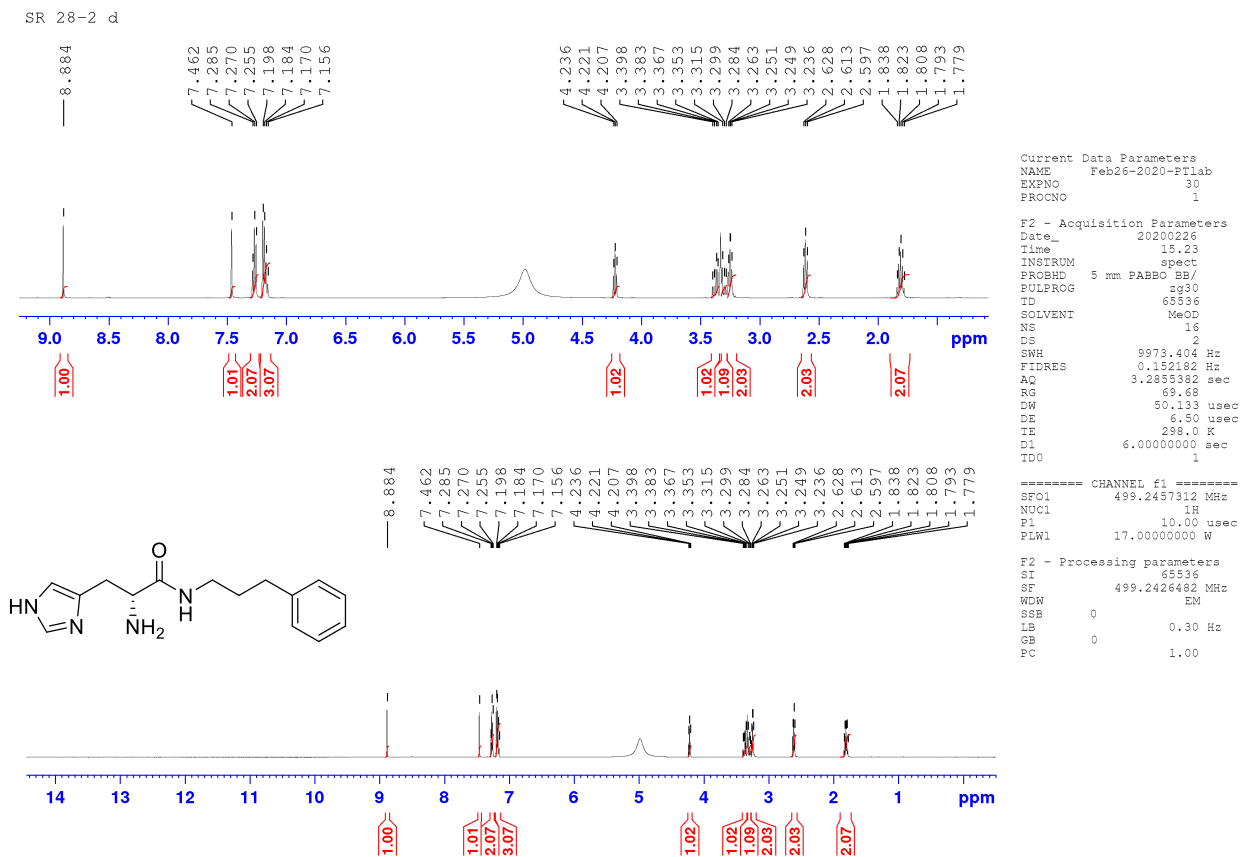

<sup>13</sup>C NMR (126 MHz, MeOH-d<sub>4</sub>), (R)-2-amino-3-(1H-imidazol-4-yl)-N-(3-phenylpropyl)propanamide (**7b**):

SR 28-2 d 13C

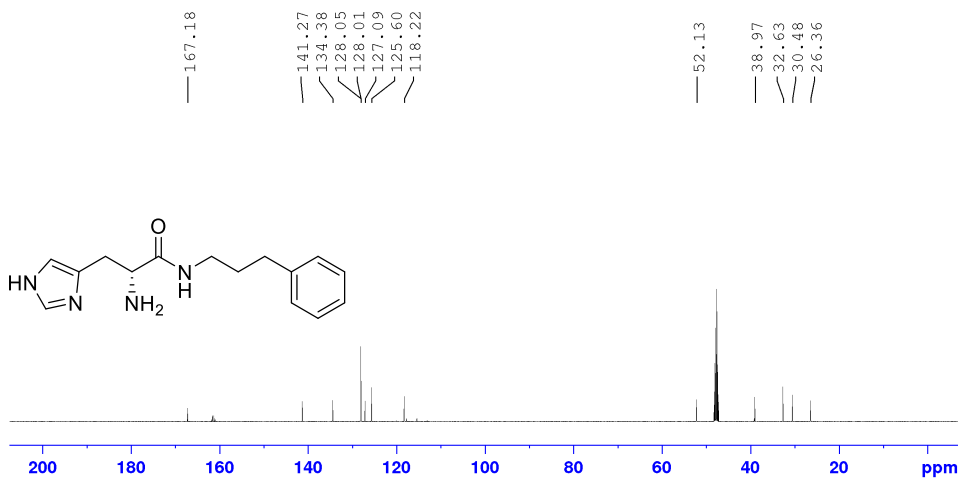

Current Data Parameters  
NAME Feb26-2020-PIlab  
EXPNO 40  
PROCNO 1

F2 - Acquisition Parameters  
Date\_ 20200226  
Time 16.34  
INSTRUM spect  
PROBHD 5 mm PABBO BB/  
PULPROG zgpg30  
ID 65536  
SOLVENT MeOD  
NS 512  
DS 4  
SWH 29761.904 Hz  
FIDRES 0.454131 Hz  
AQ 1.1010048 sec  
RG 191.52  
DW 16.800 usec  
DE 10.00 usec  
TE 300.0 K  
D1 2.0000000 sec  
D11 0.0300000 sec  
TD0 1

==== CHANNEL f1 =====  
SFO1 125.5472166 MHz  
NUC1 13C  
P1 10.00 usec  
PLW1 71.0000000 W

==== CHANNEL f2 =====  
SFO2 499.2446452 MHz  
NUC2 1H  
CPDPRG2 waltz16  
PCPD2 80.00 usec  
PLW2 17.0000000 W  
PLW12 0.26563001 W  
PLW13 0.17000000 W

F2 - Processing parameters  
SI 32768  
SF 125.5346637 MHz  
WDW EM  
SSB 0  
LB 1.00 Hz  
GB 0  
PC 1.40

<sup>1</sup>H NMR (500 MHz, MeOH-d<sub>4</sub>), (S)-2-amino-3-(1H-imidazol-4-yl)-N-(4-phenylbutyl)propanamide (**8a**):

SR 33-1 d

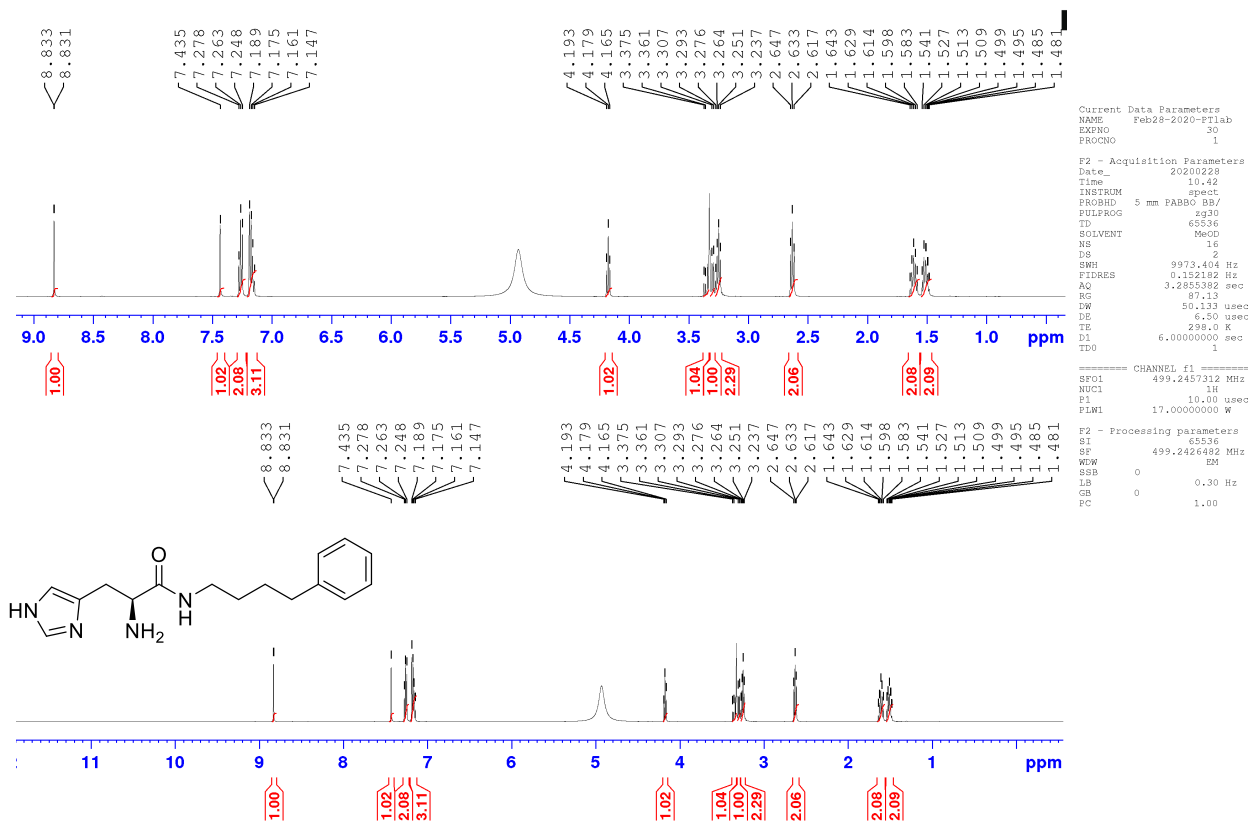

<sup>13</sup>C NMR (126 MHz, MeOH-d<sub>4</sub>), (S)-2-amino-3-(1H-imidazol-4-yl)-N-(4-phenylbutyl)propanamide (**8a**):

SR 33-1 d 13C

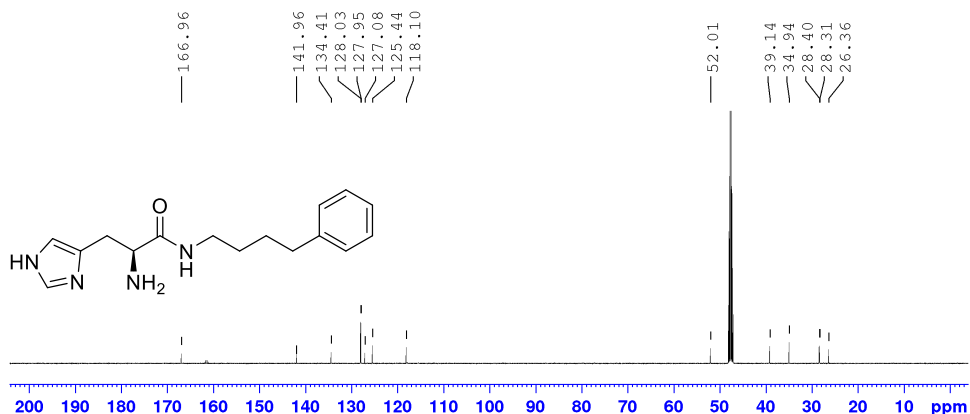

```
Current Data Parameters
NAME      Feb28-2020-PT1ab
EXPNO    40
PROCNO   1

F2 - Acquisition Parameters
Date_    20200228
Time     11.46
INSTRUM  spect
PROBHD   5 mm PABBO BB/
PULPROG  zgpg30
TD       65536
SOLVENT  MeOD
NS       512
DS       4
SWH      29761.904 Hz
FIDRES   0.454131 Hz
AQ       1.1010048 sec
RG       191.52
DW       16.800 usec
DE       10.00 usec
TE       300.0 K
D1       2.0000000 sec
D11      0.0300000 sec
TDO      1

===== CHANNEL f1 =====
SFO1     125.5472166 MHz
NUC1     13C
P1       10.00 usec
PLW1     71.0000000 W

===== CHANNEL f2 =====
SFO2     499.2446452 MHz
NUC2     1H
CPDPRG[2] waltz16
PCPD2    80.00 usec
PLW2     17.0000000 W
PLW12    0.26563001 W
PLW13    0.17000000 W

F2 - Processing parameters
SI       32768
SF       125.5346637 MHz
WDW      EM
SSB      0
LB       1.00 Hz
GB       0
FC       1.40
```

<sup>1</sup>H NMR (500 MHz, MeOH-d<sub>4</sub>), (*R*)-2-amino-3-(1*H*-imidazol-4-yl)-*N*-(4-phenylbutyl)propanamide (**8b**):

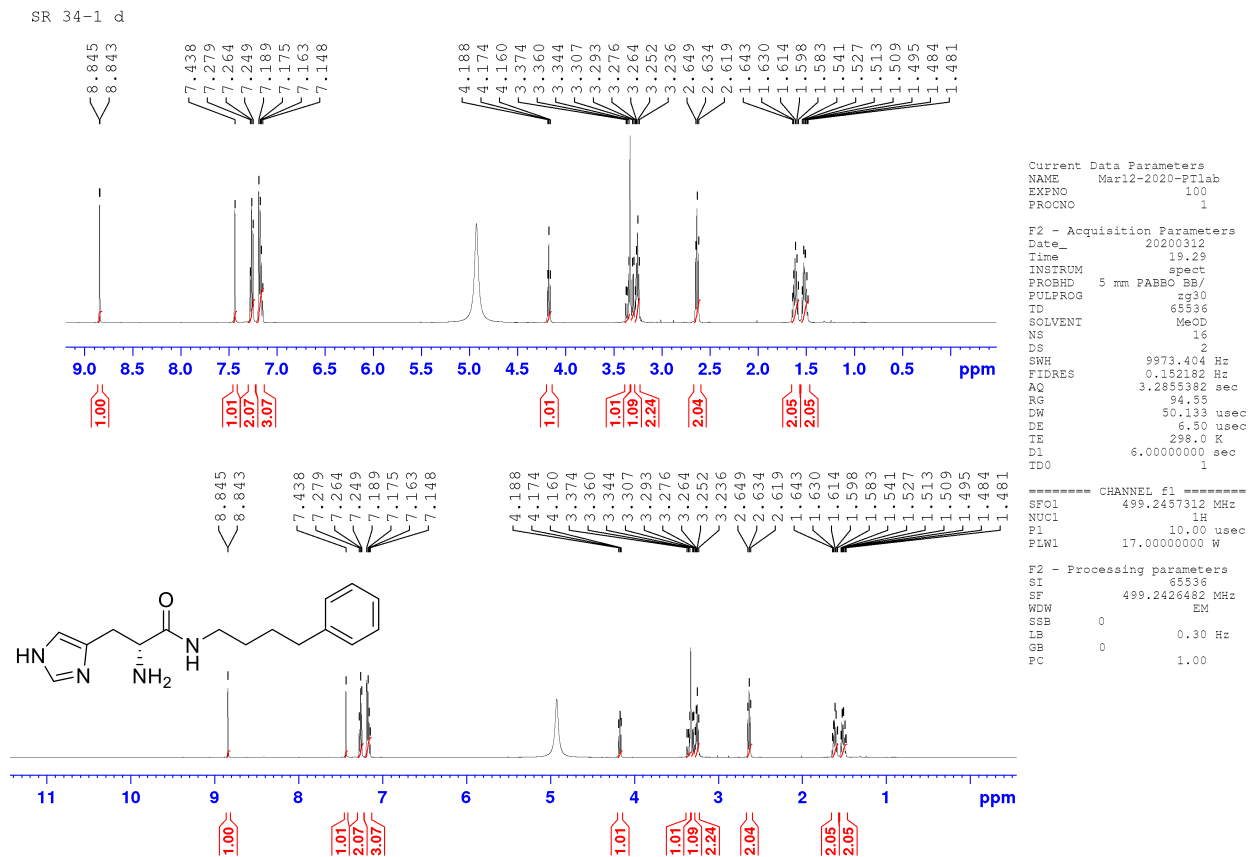

<sup>13</sup>C NMR (126 MHz, MeOH-d<sub>4</sub>), (R)-2-amino-3-(1H-imidazol-4-yl)-N-(4-phenylbutyl)propanamide (**8b**):

SR 34-1 d 13C

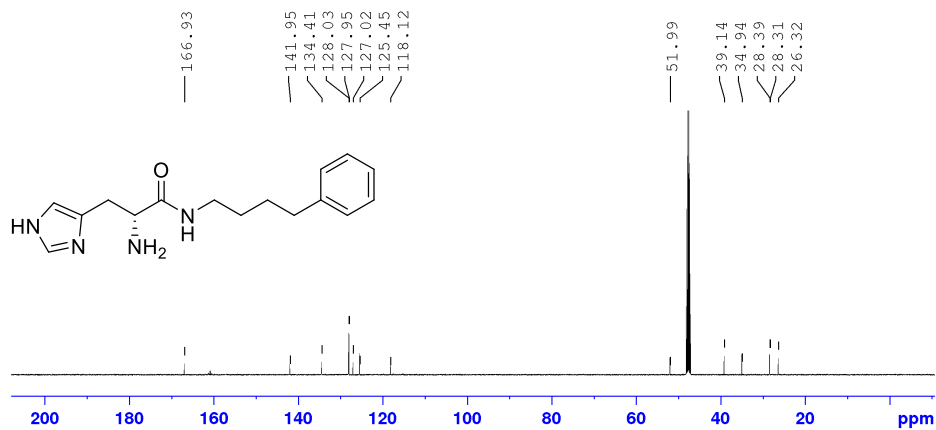

```

Current Data Parameters
NAME      Mari2-2020-Fl1ab
EXPNO    110
PROCNO   1

F2 - Acquisition Parameters
Date_    20200312
Time     20.05
INSTRUM  spect
PROBHD   5 mm PABBO BB/
PULPROG  zgpg30
TD        65536
SOLVENT  MeOD
NS        512
DS         4
SWH       29761.904 Hz
FIDRES    0.454131 Hz
AQ         1.1010048 sec
RG         191.52
DW         16.800 usec
DE         10.00 usec
TE         300.0 K
D1         2.00000000 sec
D11        0.03000000 sec
TD0        1
    
```

```

===== CHANNEL f1 =====
SFO1    125.5472166 MHz
NUC1     13C
P1       10.00 usec
PLW1     71.00000000 W

===== CHANNEL f2 =====
SFO2    499.2446452 MHz
NUC2     1H
CPDPRG[2]  waltz16
PCPD2    80.00 usec
PLW2    17.00000000 W
PLW12   0.26563001 W
PLW13   0.17000000 W

F2 - Processing parameters
SI        32768
SF        125.5346637 MHz
WDW       EM
SSB       0
LB        1.00 Hz
GB        0
PC        1.40
    
```

<sup>1</sup>H NMR (400 MHz, MeOH-d<sub>4</sub>), (S)-N-(2-(1H-indol-3-yl)ethyl)-2-amino-3-(1H-imidazol-4-yl)propanamide

(9d):

SR 7-2 d  
zg30 MeOD {C:\Bruker\TopSpin3.2\Iconnmr} PTLab 10

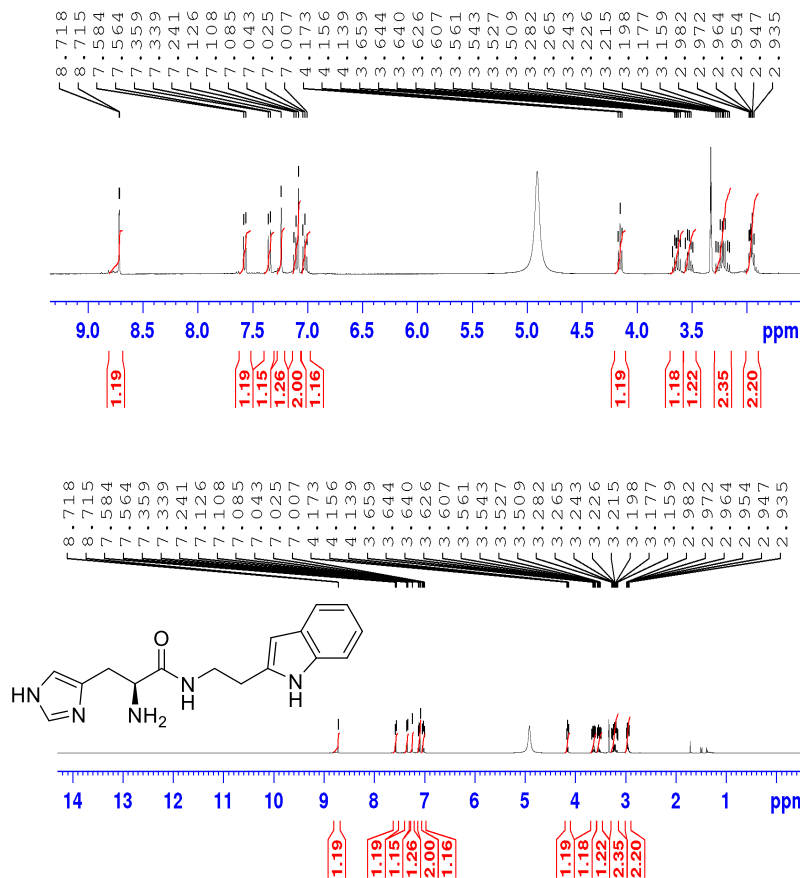

Current Data Parameters  
NAME Dec18-2020-PTLab  
EXPNO 80  
PROCNO 1

F2 - Acquisition Parameters  
Date\_ 20201218  
Time 22.27  
INSTRUM spect  
PROBHD 5 mm PABBO BB/  
PULPROG zg30  
TD 30046  
SOLVENT MeOD  
NS 16  
DS 1  
SWH 8012.820 Hz  
FIDRES 0.266685 Hz  
AQ 1.8748704 sec  
RG 256  
DW 62.400 usec  
DE 6.50 usec  
TE 300.1 K  
D1 6.00000000 sec  
TDO 1

===== CHANNEL f1 =====  
SF01 400.2821952 MHz  
NUC1 1H  
P1 10.86 usec  
PLW1 17.00000000 W

F2 - Processing parameters  
SI 131072  
SF 400.2800000 MHz  
WDW EM  
SSB 0  
LB 0.20 Hz  
GB 0  
PC 1.00

(9d):

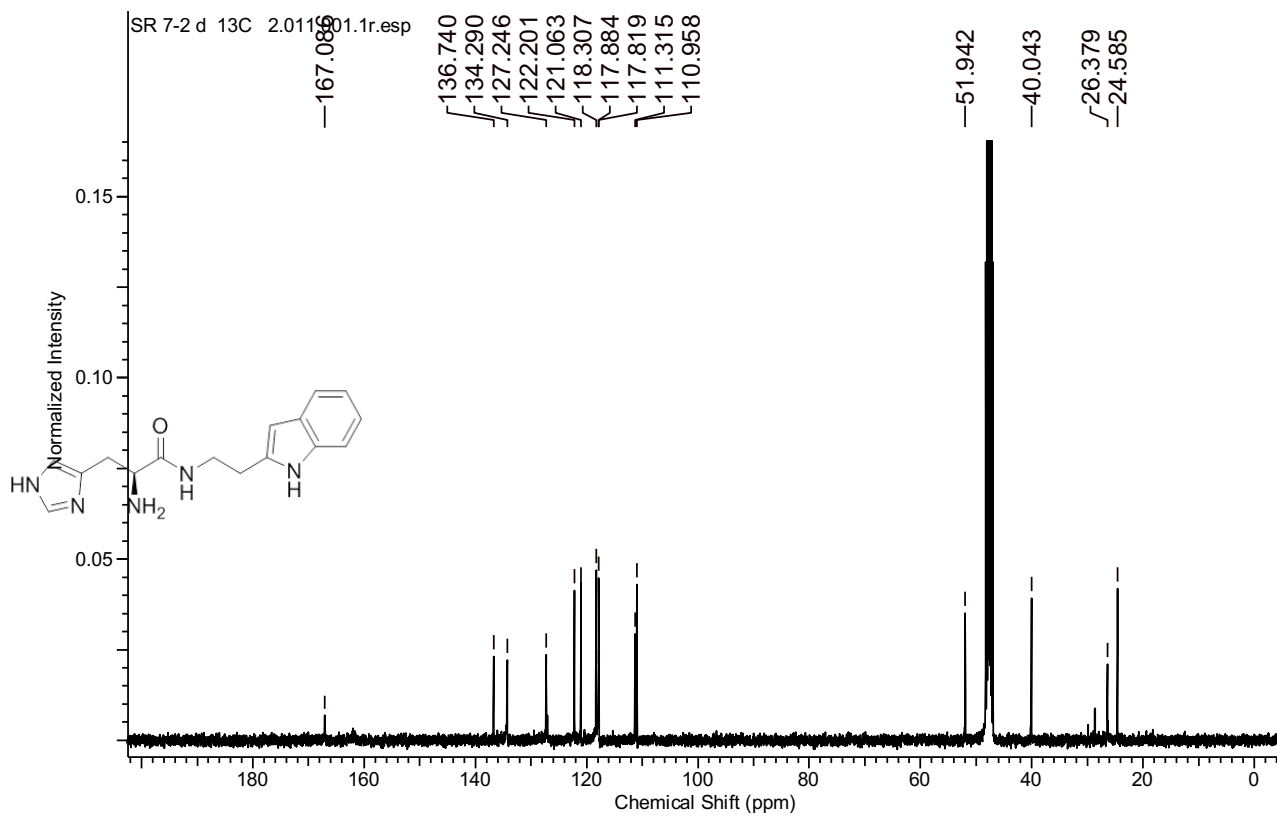



<sup>1</sup>H NMR (400 MHz, MeOH-d<sub>4</sub>), (R)-N-(2-(1H-indol-3-yl)ethyl)-2-amino-3-(1H-imidazol-4-yl)propanamide

(9e):

SR 8-3 d  
zg30 MeOD {C:\Bruker\TopSpin3.2\Iconnmr} PTLab 3

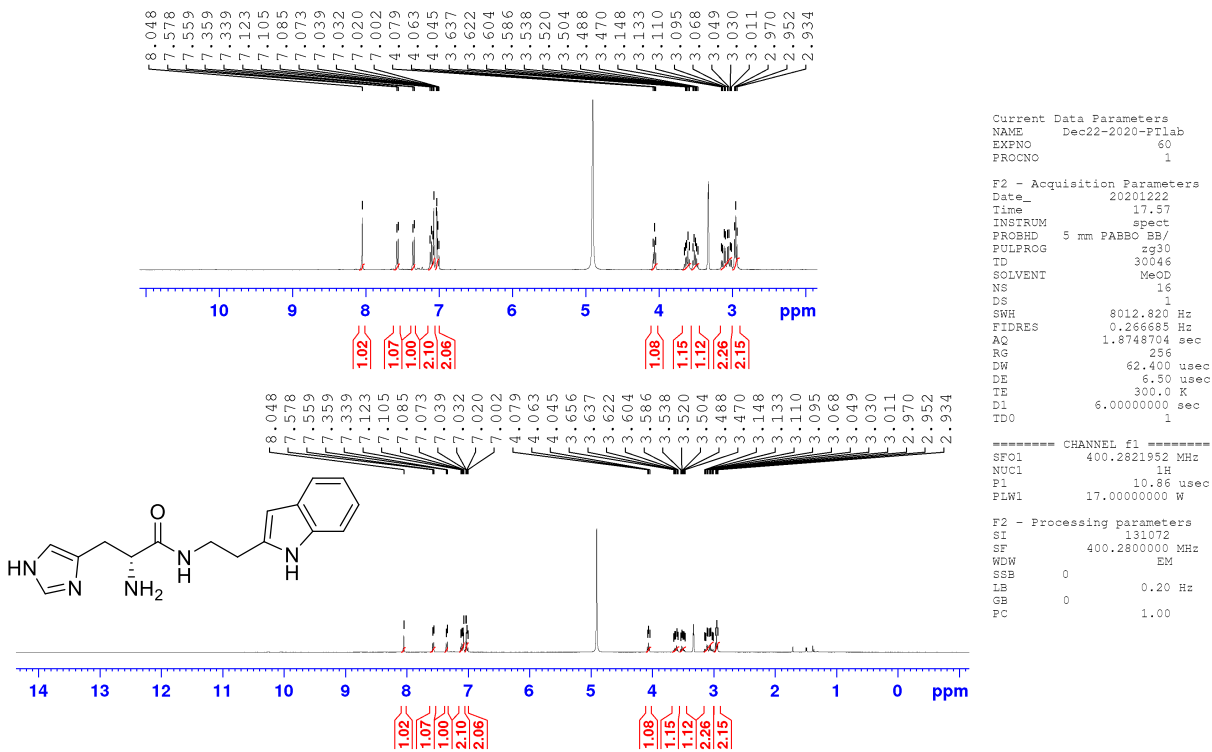

<sup>13</sup>C NMR (100 MHz, MeOH-d<sub>4</sub>), (R)-N-(2-(1H-indol-3-yl)ethyl)-2-amino-3-(1H-imidazol-4-yl)propanamide

(9e):

SR 8-3 d 13C  
C13CPD MeOD {C:\Bruker\TopSpin3.2\Iconnmr} PTLab 17

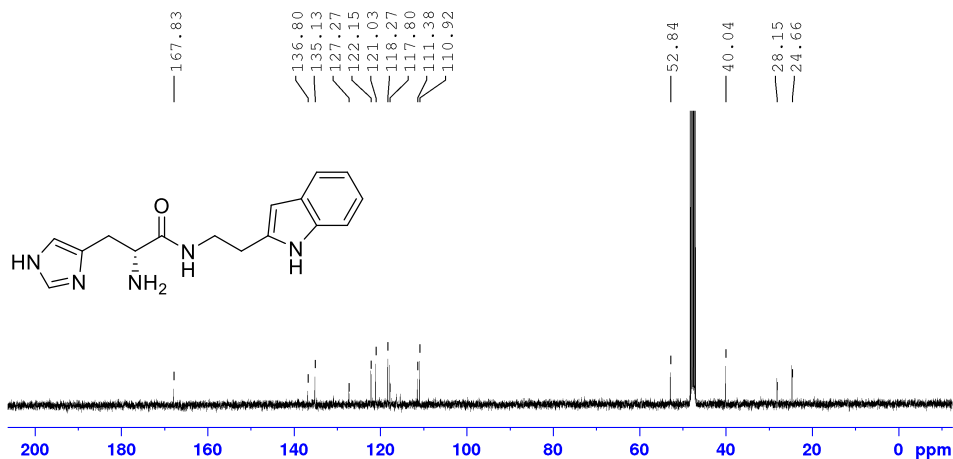

Current Data Parameters  
NAME Dec24-2020-PTLab  
EXPNO 80  
PROCNO 1

F2 - Acquisition Parameters  
Date\_ 20201224  
Time 20.36  
INSTRUM spect  
PROBHD 5 mm PABBO BB/  
PULPROG zgpg30  
TD 65336  
SOLVENT MeOD  
NS 512  
DS 4  
SWH 24038.461 Hz  
FIDRES 0.366798 Hz  
AQ 1.3631488 sec  
RG 2050  
DW 20.800 usec  
DE 6.50 usec  
TE 300.0 K  
D1 2.0000000 sec  
D11 0.0300000 sec  
TDO 1

=====  
CHANNEL f1  
SFO1 100.6505506 MHz  
NUC1 13C  
P1 11.00 usec  
PLW1 48.0000000 W

=====  
CHANNEL f2  
SFO2 400.2816011 MHz  
NUC2 1H  
CPDPRG2 waltz16  
PCPD2 90.00 usec  
PLW2 17.0000000 W  
PLW12 0.24753000 W  
PLW13 0.20050000 W

F2 - Processing parameters  
SI 32768  
SF 100.6504861 MHz  
WDW EM  
SSB 0  
LB 1.00 Hz  
GB 0  
PC 1.40

<sup>1</sup>H NMR (400 MHz, MeOH-d<sub>4</sub>), (S)-2-amino-3-(1H-imidazol-4-yl)-N-(2-(naphthalen-2-yl)ethyl)propanamide

(9f):

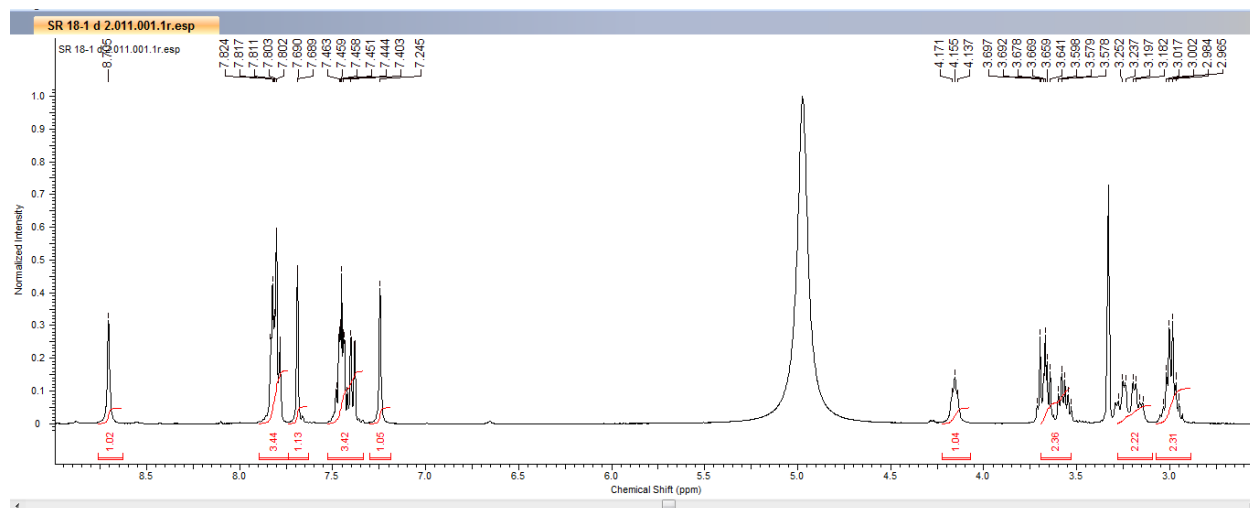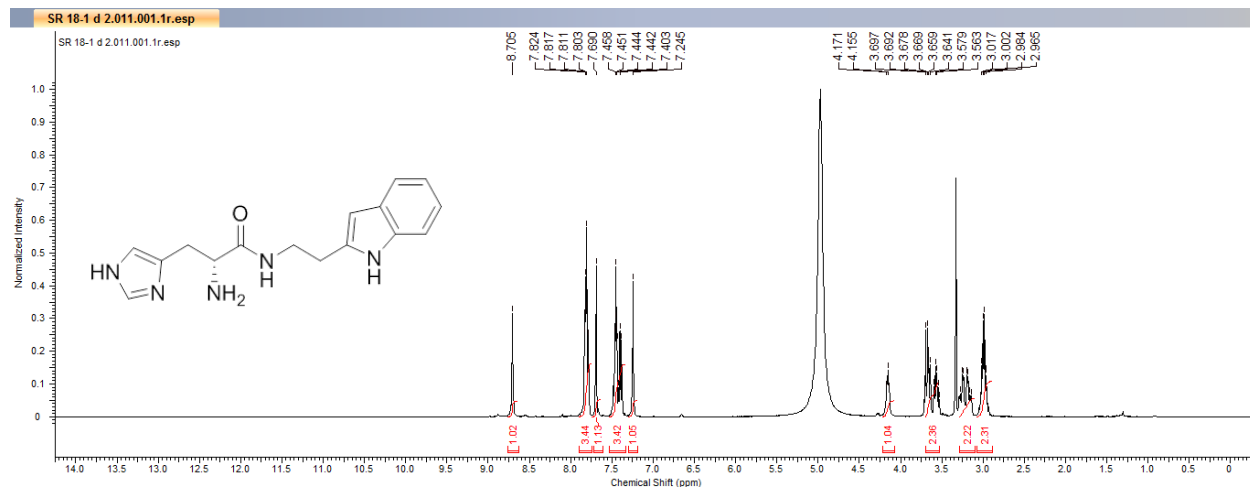

<sup>13</sup>C NMR (100 MHz, MeOH-d<sub>4</sub>), (S)-2-amino-3-(1H-imidazol-4-yl)-N-(2-(naphthalen-2-yl)ethyl)propanamide

(9f):

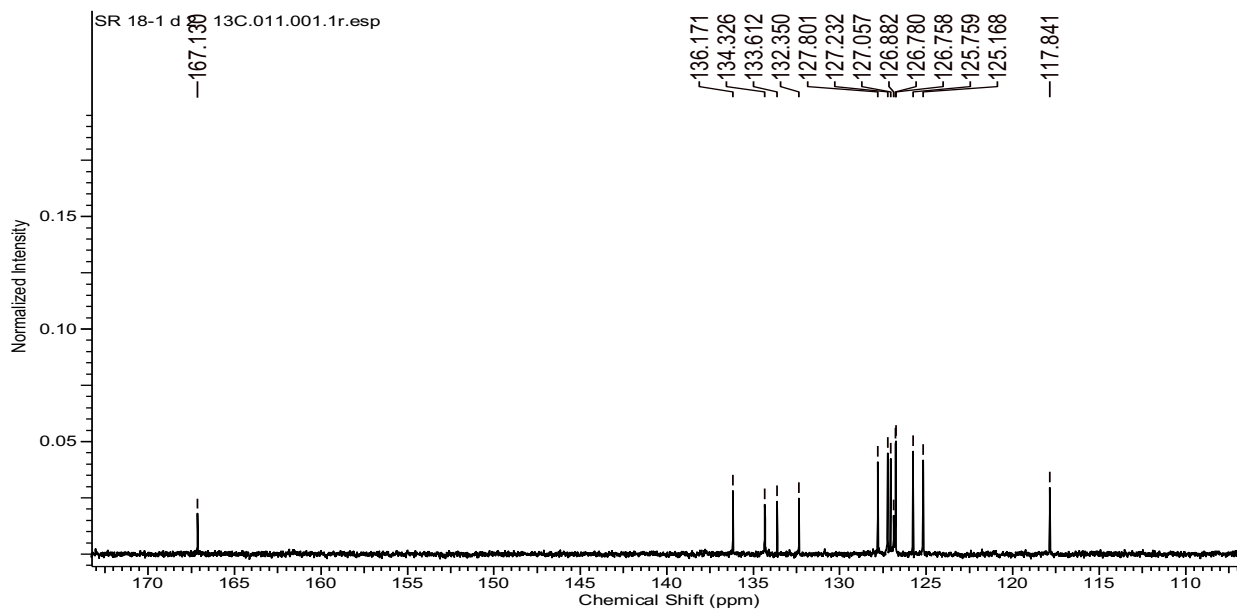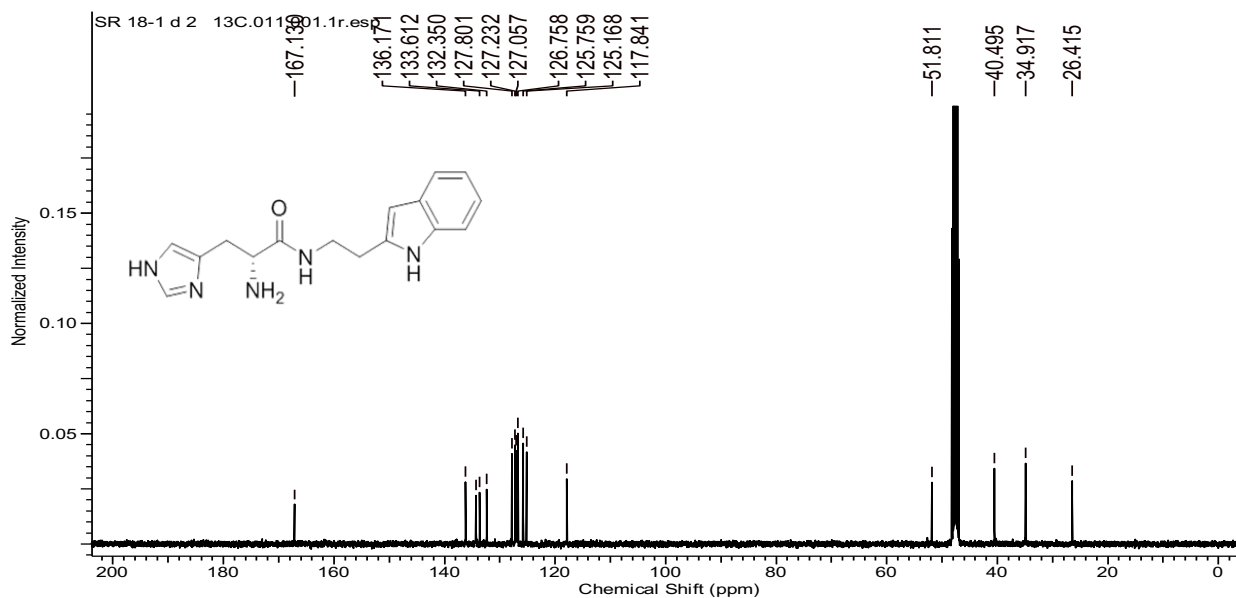

<sup>1</sup>H NMR (400 MHz, MeOH-d<sub>4</sub>), (R)-2-amino-3-(1H-imidazol-4-yl)-N-(2-(naphthalen-2-yl)ethyl)propanamide

(9g):

SR 19-2 d  
zg30 MeOD {C:\Bruker\TopSpin3.2\Iconnmr} PTLab 10

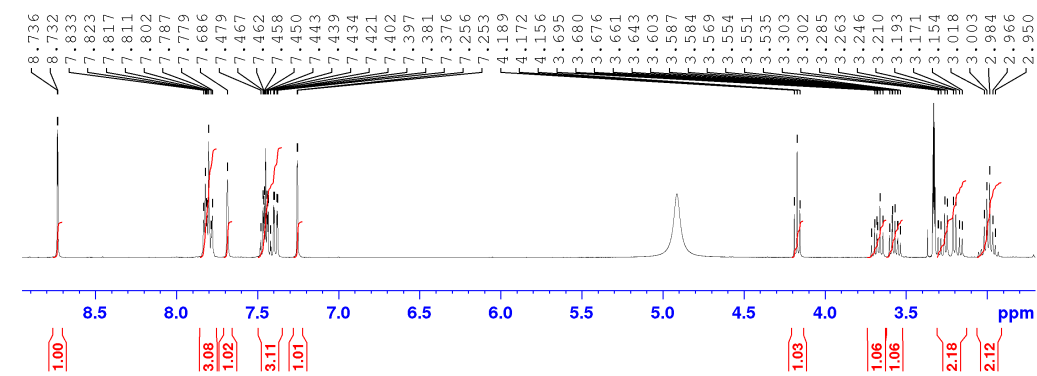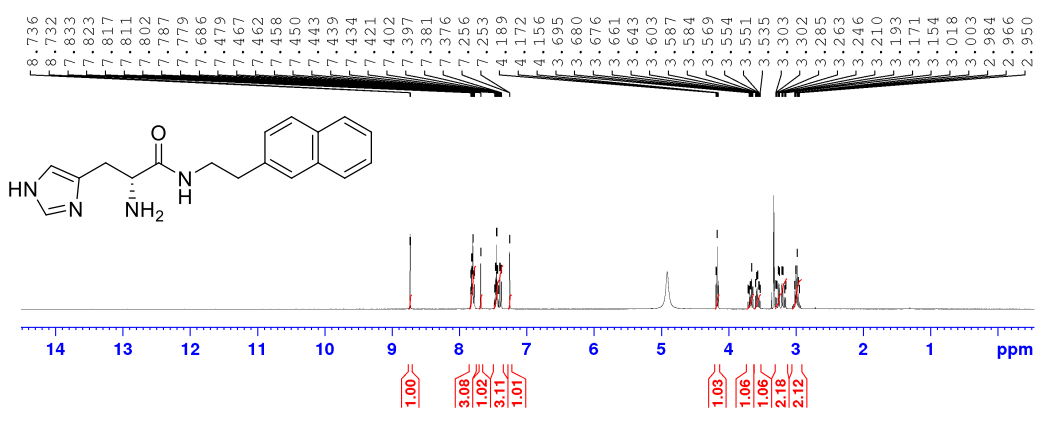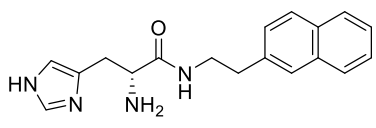

(9g):

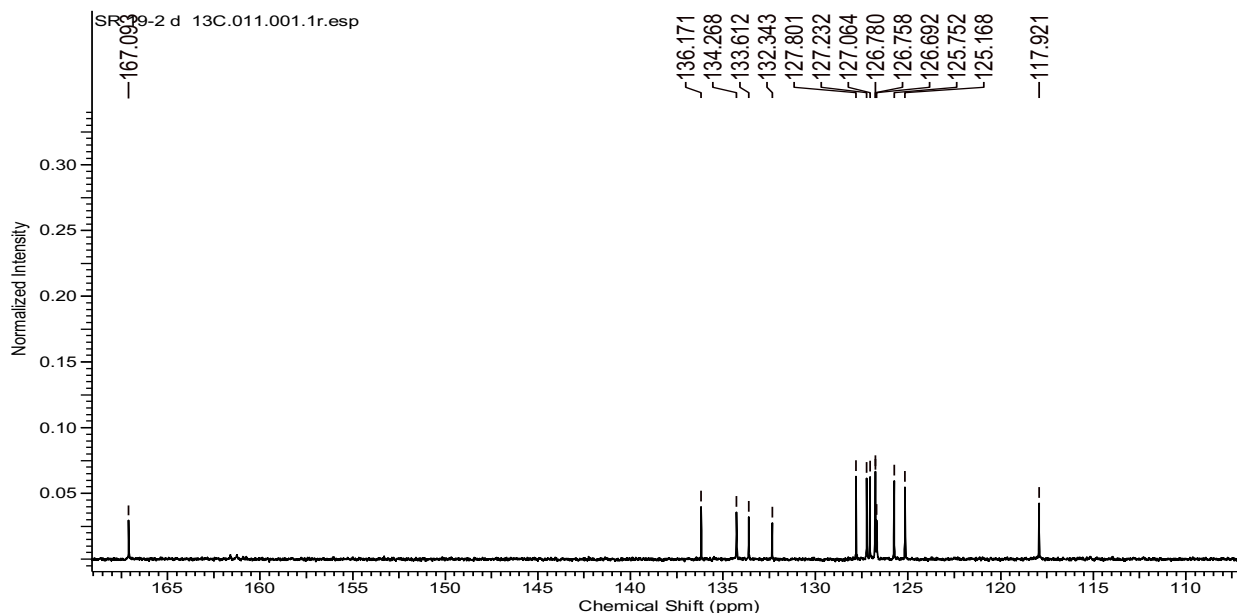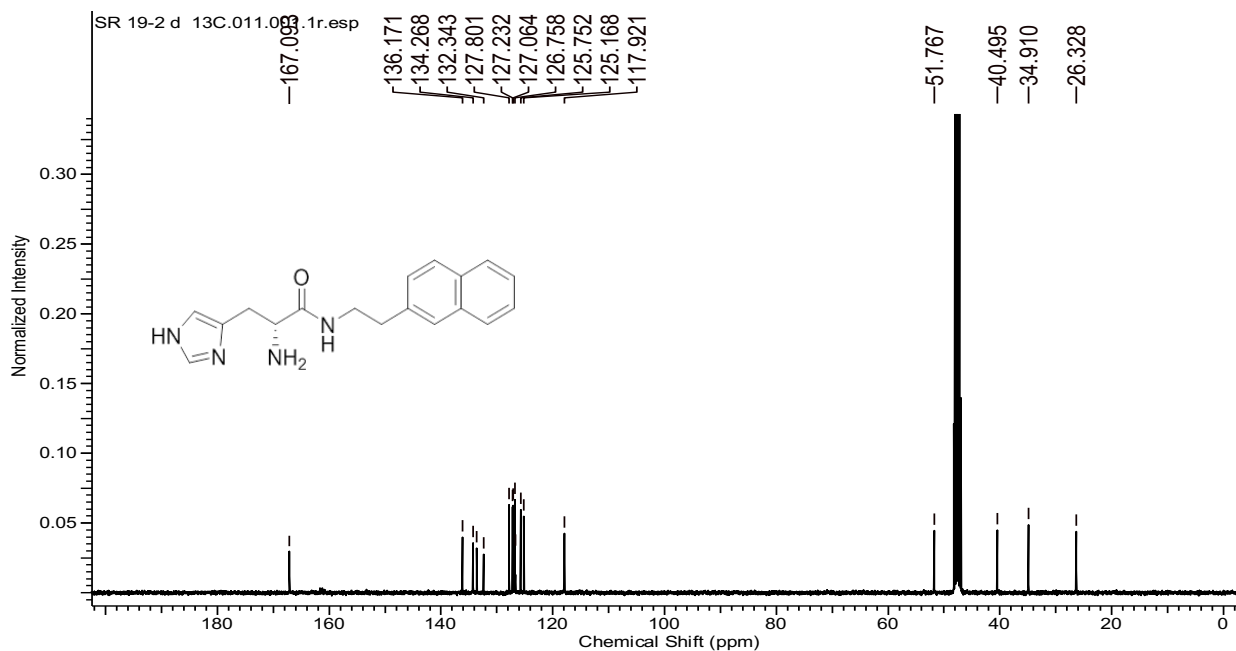

<sup>1</sup>H NMR (500 MHz, MeOH-d<sub>4</sub>), (S)-2-amino-3-(1H-imidazol-4-yl)-N-(naphthalen-2-ylmethyl)propanamide

(10a):

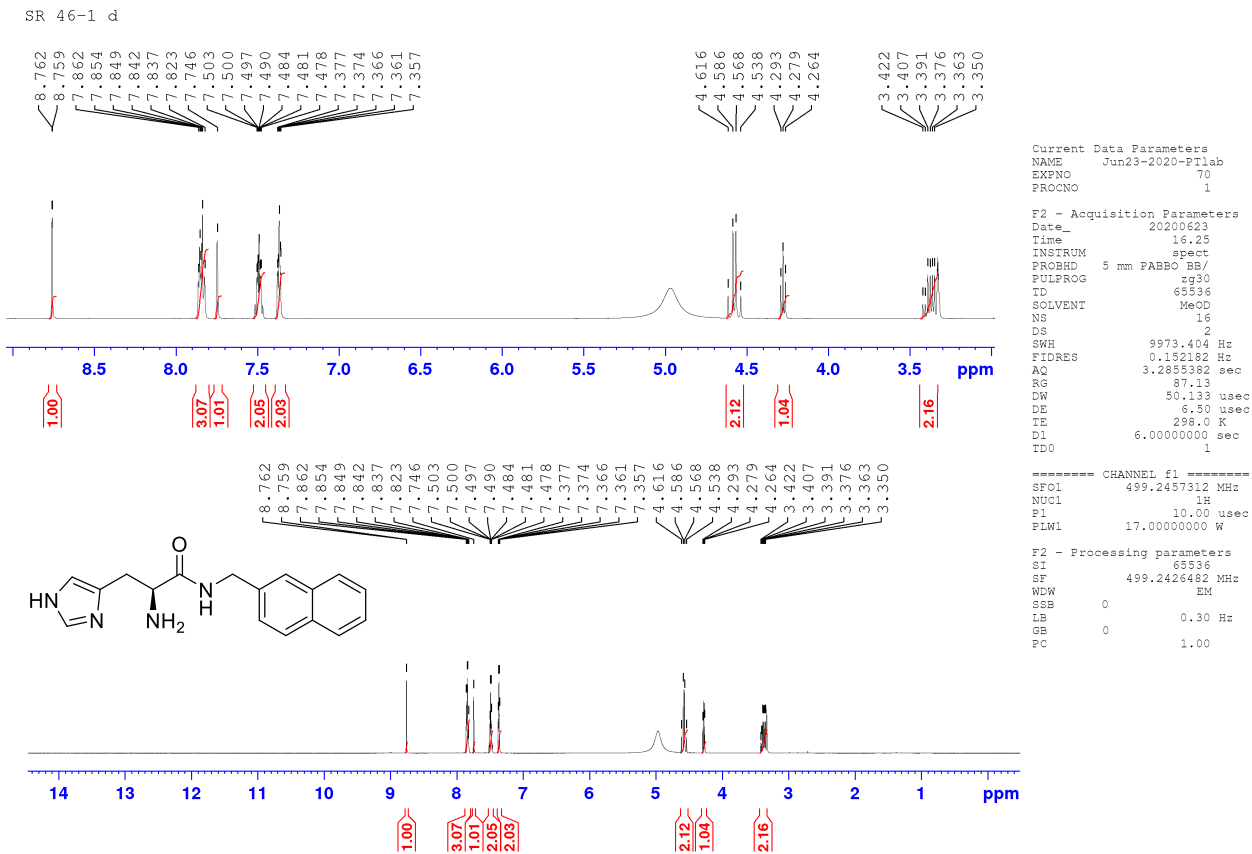

<sup>13</sup>C NMR (126 MHz, MeOH-d<sub>4</sub>), (S)-2-amino-3-(1H-imidazol-4-yl)-N-(naphthalen-2-ylmethyl)propanamide

(10a):

SR 46-1 d 13C

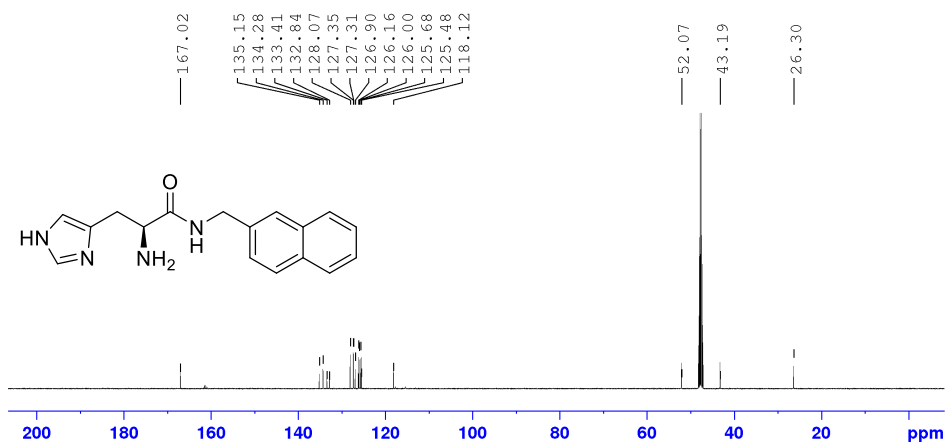

```
Current Data Parameters
NAME      Jun23-2020-F1lab
EXPNO     80
PROCNO    1

F2 - Acquisition Parameters
Date_     20200623
Time      18.05
INSTRUM   spect
PROBHD    5 mm PABBO BB/
PULPROG   zgpg30
ID        65536
SOLVENT   MeOD
NS        512
DS        4
SWH        29761.904 Hz
FIDRES     0.454131 Hz
AQ         1.1010048 sec
RG         191.52
DW         16.800 usec
DE         10.00 usec
TE         300.0 K
D1         2.00000000 sec
D11        0.03000000 sec
TD0        1

===== CHANNEL f1 =====
SFO1      125.5472166 MHz
NUC1       13C
P1         10.00 usec
PLW1       71.00000000 W

===== CHANNEL f2 =====
SFO2      499.2446452 MHz
NUC2       1H
CPDPRG[2]  waltz16
PCPD2     80.00 usec
PLW2      17.00000000 W
PLW12     0.26563001 W
PLW13     0.17000000 W

F2 - Processing parameters
SI         32768
SF         125.5346637 MHz
WDW        EM
SSB        0
LB         1.00 Hz
GB         0
PC         1.40
```



<sup>1</sup>H NMR (500 MHz, MeOH-d<sub>4</sub>), (R)-2-amino-3-(1H-imidazol-4-yl)-N-(naphthalen-2-ylmethyl)propanamide

(10b):

SR 45-1 d

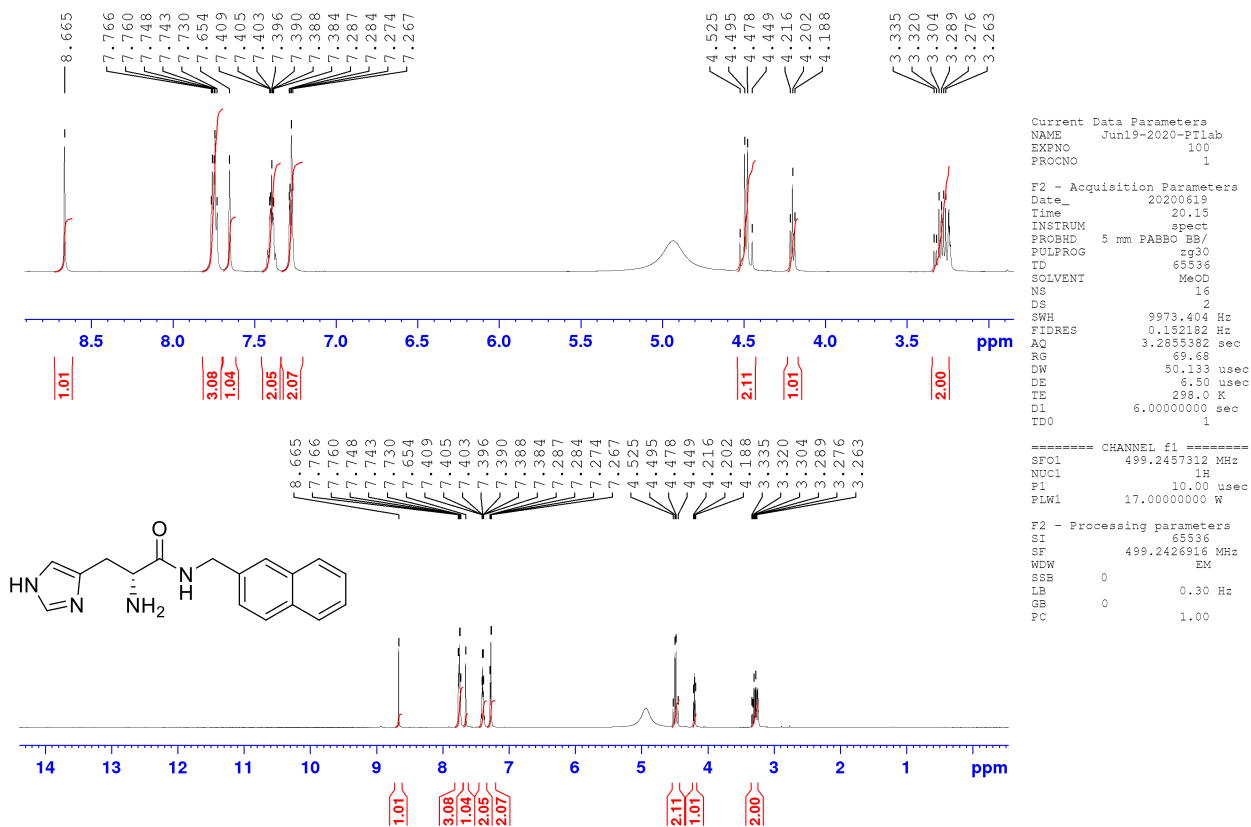

<sup>13</sup>C NMR (126 MHz, MeOH-d<sub>4</sub>), (R)-2-amino-3-(1H-imidazol-4-yl)-N-(naphthalen-2-ylmethyl)propanamide

(10b):

SR 45-1 d 13 C

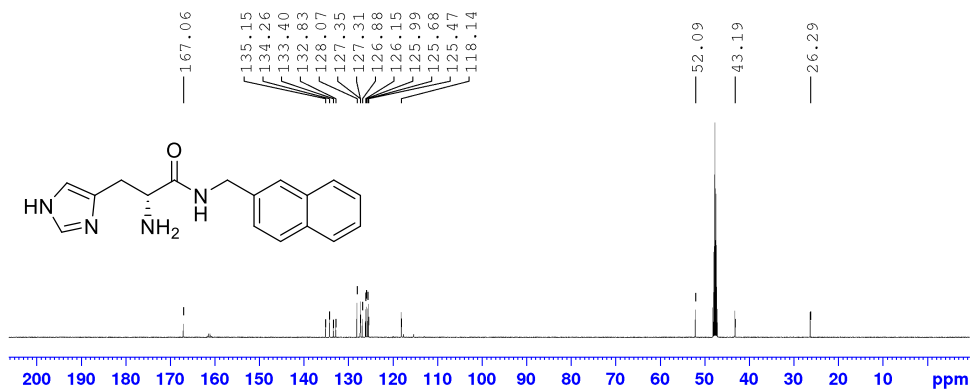

```
Current Data Parameters
NAME      Jun19-2020-PTlab
EXPNO     110
PROCNO    1

F2 - Acquisition Parameters
Date_     20200619
Time      20.49
INSTRUM   spect
PROBHD    5 mm PABBO BB/
PULPROG   zgpg30
TD         65536
SOLVENT   MeOD
NS         512
DS         4
SWH        29761.904 Hz
FIDRES     0.454131 Hz
AQ         1.1010048 sec
RG         191.52
DW         16.800 usec
DE         10.00 usec
TE         300.0 K
D1         2.00000000 sec
D11        0.03000000 sec
TD0        1

===== CHANNEL f1 =====
SFO1      125.5472166 MHz
NUC1       13C
P1         10.00 usec
PLW1       71.00000000 W

===== CHANNEL f2 =====
SFO2      499.2446452 MHz
NUC2       1H
CPDPRG[2] waltz16
PCPD2     80.00 usec
PLW2      17.00000000 W
PLW12     0.26563001 W
PLW13     0.17000000 W

F2 - Processing parameters
SI         32768
SF         125.5346637 MHz
WDW        EM
SSB        0
LB         1.00 Hz
GB         0
PC         1.40
```

<sup>1</sup>H NMR (400 MHz, MeOH-d<sub>4</sub>), (S)-2-amino-3-(1H-imidazol-4-yl)-N-(naphthalen-1-ylmethyl)propanamide

(10c):

SR 9-2 d  
zg30 MeOD {C:\Bruker\TopSpin3.2\Iconnmr} PTLab 4

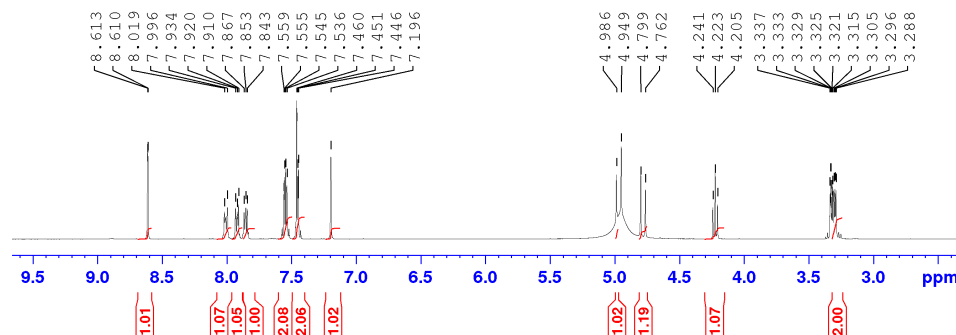

Current Data Parameters  
NAME Dec31-2020-PTLab  
EXPNO 80  
PROCNO 1

F2 - Acquisition Parameters  
Date\_ 20201231  
Time 19.05  
INSTRUM spect  
PROBHD 5 mm PABBO BB/  
PULPROG zg30  
TD 30046  
SOLVENT MeOD  
NS 16  
DS 1  
SWH 8012.820 Hz  
FIDRES 0.266685 Hz  
AQ 1.8748704 sec  
RG 256  
DM 62.400 usec  
DE 6.50 usec  
TE 300.1 K  
D1 6.00000000 sec  
TD0 1

===== CHANNEL f1 =====  
SFO1 400.2821952 MHz  
NUC1 1H  
P1 10.86 usec  
PLW1 17.00000000 W

F2 - Processing parameters  
SI 131072  
SF 400.2800000 MHz  
WDW EM  
SBB 0  
LB 0.20 Hz  
GB 0  
PC 1.00

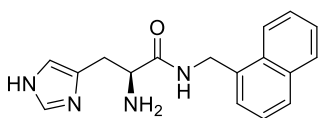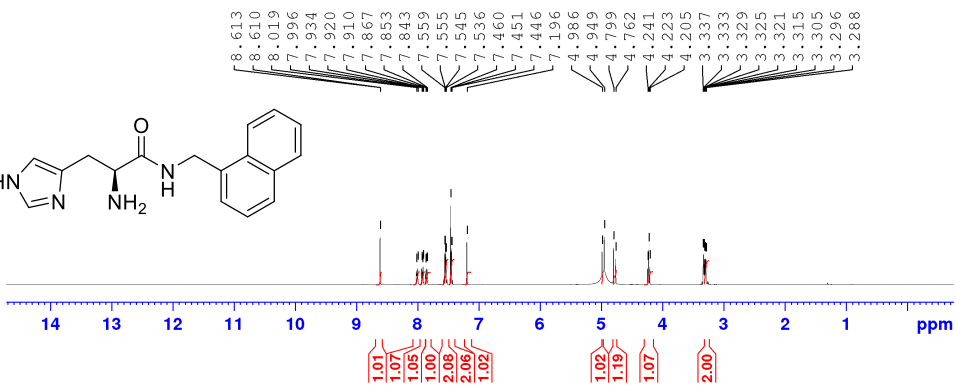

<sup>13</sup>C NMR (100 MHz, MeOH-d<sub>4</sub>), (S)-2-amino-3-(1H-imidazol-4-yl)-N-(naphthalen-1-ylmethyl)propanamide

(10c):

SR 9-2 d 13C  
C13CPD MeOD {C:\Bruker\TopSpin3.2\Iconnmr} PTLab 4

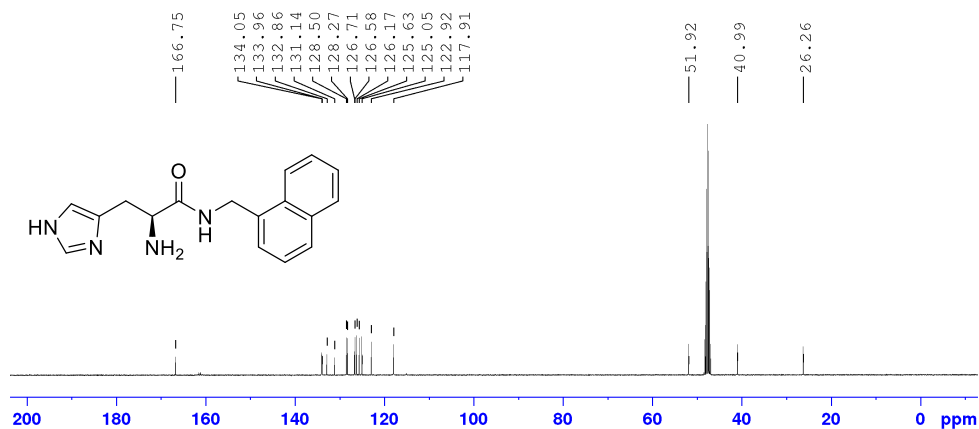

```
Current Data Parameters
NAME      Dec31-2020-PTLab
EXPNO    50
PROCNO   1

F2 - Acquisition Parameters
Date_    20201231
Time     19.48
INSTRUM  spect
PROBHD   5 mm PABBO BB/
PULPROG  zgpg30
TD       65536
SOLVENT  MeOD
NS       512
DS       4
SWH      24038.461 Hz
FIDRES   0.366798 Hz
AQ       1.3631488 sec
RG       2050
DW       20.800 usec
DE       6.50 usec
TE       300.0 K
D1       2.00000000 sec
D11      0.03000000 sec
TDO      1

===== CHANNEL f1 =====
SFO1    100.6605506 MHz
NUC1     13C
P1      11.00 usec
PLW1    48.00000000 W

===== CHANNEL f2 =====
SFO2    400.2816011 MHz
NUC2     1H
CPDPRG2  waltz16
PCPD2    90.00 usec
PLW2    17.00000000 W
PLW3    0.24753000 W
PLW4    0.20050000 W

F2 - Processing parameters
SI       32768
SF       100.6504861 MHz
WDW      EM
SSB      0
LB       1.00 Hz
GB       0
PC       1.40
```

<sup>1</sup>H NMR (400 MHz, MeOH-d<sub>4</sub>), (R)-2-amino-3-(1H-imidazol-4-yl)-N-(naphthalen-1-ylmethyl)propanamide

(10d):

SR 10-2 d  
zg30 MeOD {C:\Bruker\TopSpin3.2\Iconnmr} PTLab 10

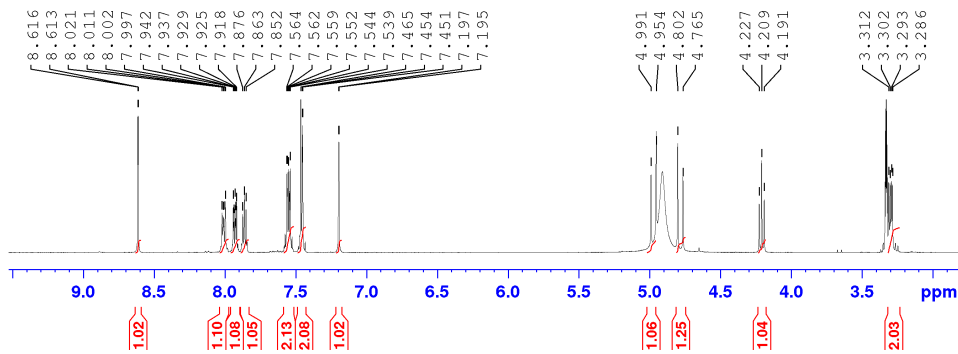

Current Data Parameters  
NAME Nov28-2020-PTLab  
EXPNO 10  
PROCNO 1

F2 - Acquisition Parameters  
Date\_ 20201128  
Time 16.55  
INSTRUM spect  
PROBHD 5 mm PABBO BB/  
PULPROG zg30  
TD 30048  
SOLVENT MeOD  
NS 16  
DS 1  
SWH 8012.820 Hz  
FIDRES 0.266665 Hz  
AQ 1.8748704 sec  
RG 256  
DW 62.400 usec  
DE 6.50 usec  
TE 300.2 K  
D1 6.00000000 sec  
D11 1

==== CHANNEL f1 =====  
SF01 400.2821952 MHz  
NUC1 1H  
P1 10.86 usec  
PLW1 17.00000000 W

F2 - Processing parameters  
SI 131072  
SF 400.2800000 MHz  
WDW EM  
SSB 0  
LB 0.20 Hz  
GB 0  
PC 1.00

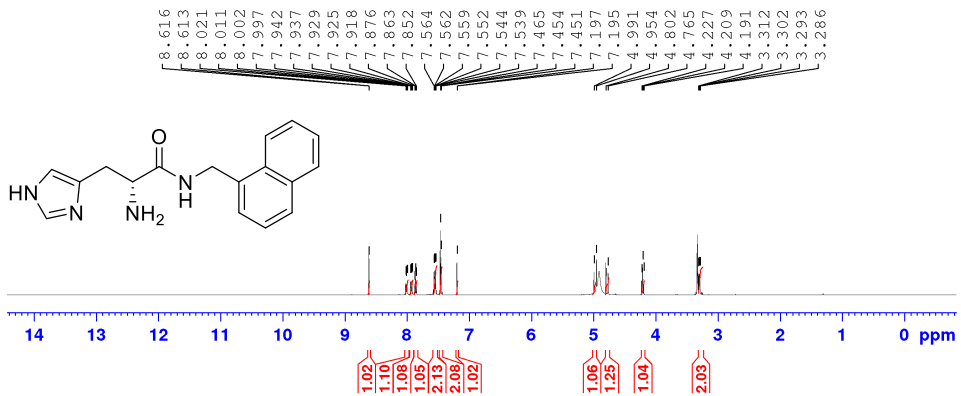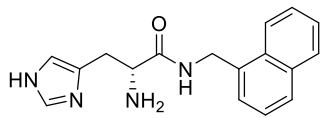

<sup>13</sup>C NMR (100 MHz, MeOH-d<sub>4</sub>), (R)-2-amino-3-(1H-imidazol-4-yl)-N-(naphthalen-1-ylmethyl)propanamide

(10d):

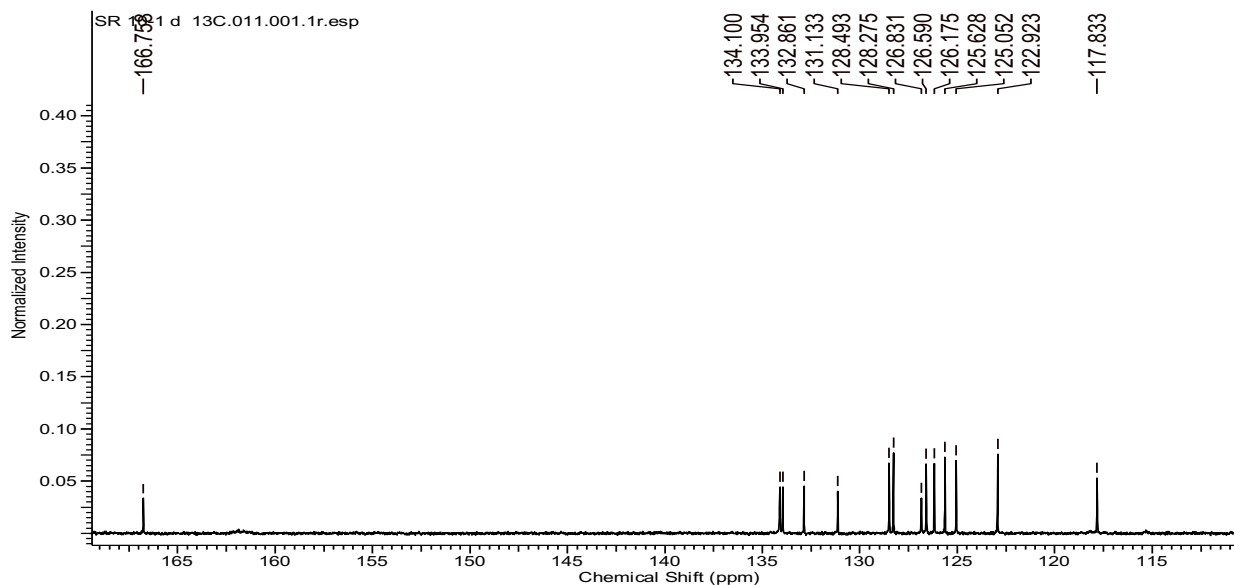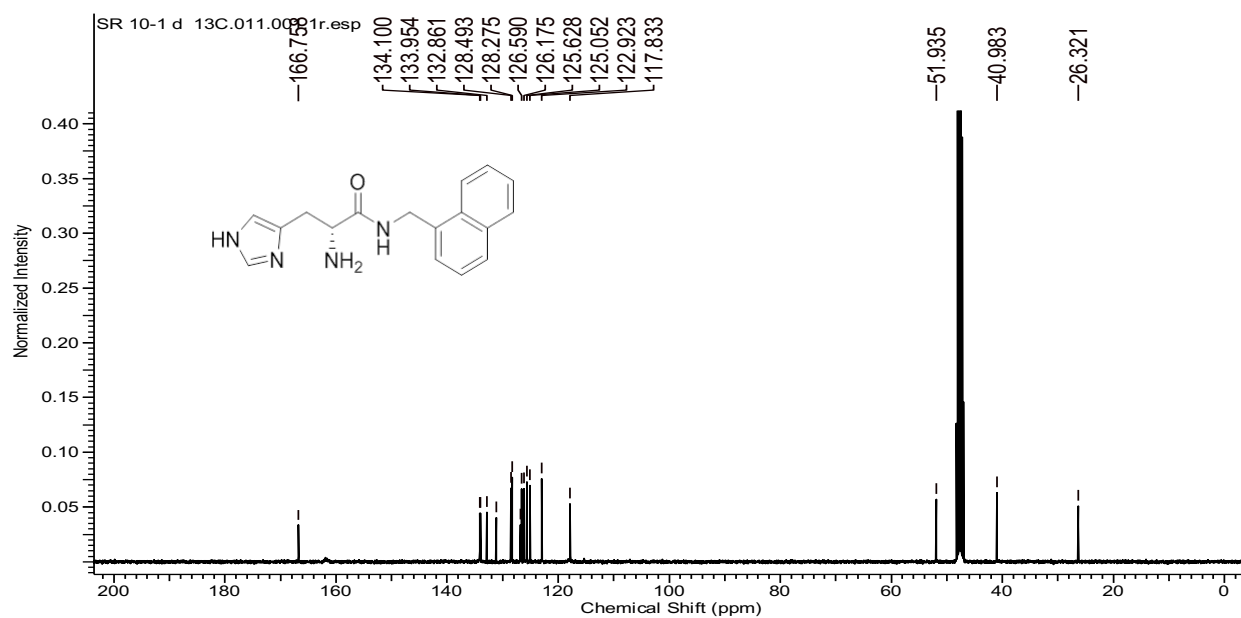

<sup>1</sup>H NMR (500 MHz, MeOH-d<sub>4</sub>), (S)-2-amino-3-(1H-imidazol-4-yl)-N-(quinolin-8-yl)propanamide (**11a**):

SR 23-1 d

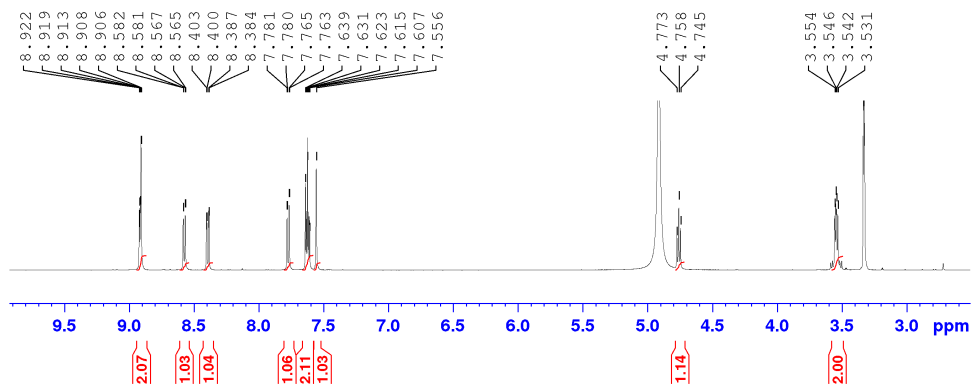

```

Current Data Parameters
NAME      Nov15-2019-r11ab
EXPNO    20
PROCNO   1

F2 - Acquisition Parameters
Date_    20191115
Time     19.21
INSTRUM  spect
PROBHD   5 mm PABBO BB/
PULPROG  zg30
TD       65536
SOLVENT  MeOD
NS       16
DS       2
SWH      9973.404 Hz
FIDRES   0.152182 Hz
AQ       3.285532 sec
RG       152.34
DW       50.133 usec
DE       6.50 usec
TE       298.0 K
D1       6.00000000 sec
TD0      1
    
```

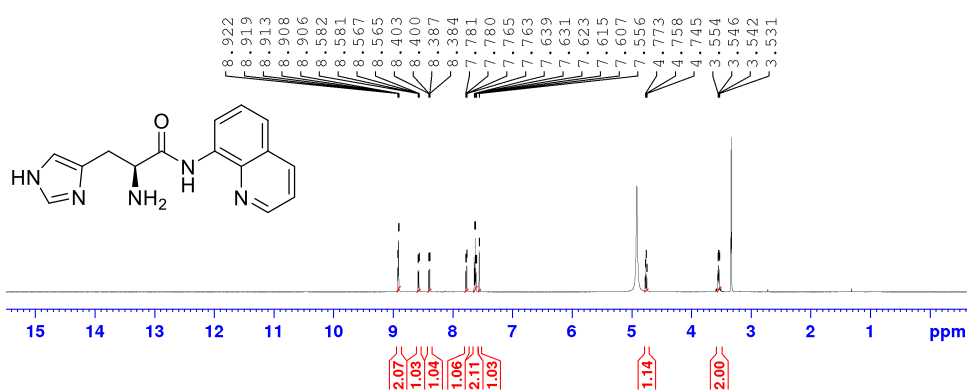

```

----- CHANNEL f1 -----
SF01    499.2621482 MHz
NUC1     1H
PI       10.00 usec
PLW1    17.00000000 W

F2 - Processing parameters
SI       65536
SF       499.2590651 MHz
WDW      EM
SSB      0
LB       0.30 Hz
GB       0
PC       1.00
    
```

<sup>13</sup>C NMR (126 MHz, MeOH-d<sub>4</sub>), (S)-2-amino-3-(1H-imidazol-4-yl)-N-(quinolin-8-yl)propanamide (**11a**):

SR 23-1 d 13 C

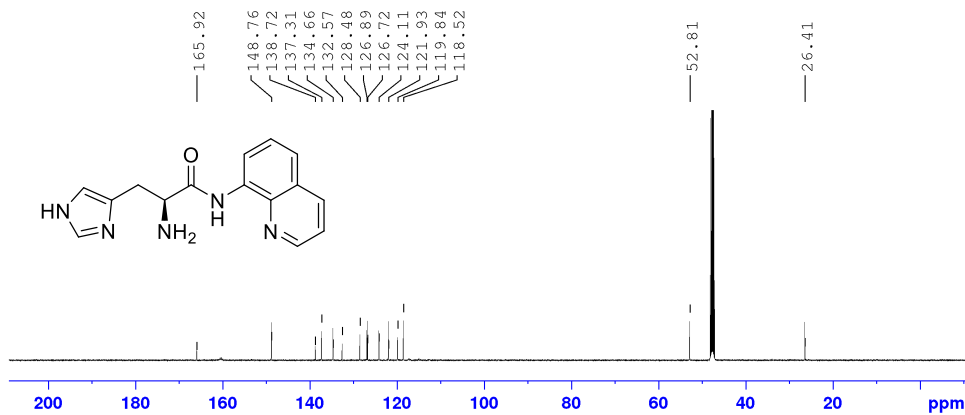

```

Current Data Parameters
NAME      Nov15-2019-Pr1ab
EXPNO    50
PROCNO    1

F2 - Acquisition Parameters
Date_    20191115
Time     20.56
INSTRUM  spect
PROBHD   5 mm PABBO BB/
PULPROG  zgpg30
TD       65536
SOLVENT  MeOD
NS       512
DS       4
SWH      29761.904 Hz
FIDRES   0.454131 Hz
AQ       1.1010048 sec
RG       191.52
DW       16.800 usec
DE       10.00 usec
TE       300.0 K
D1       2.0000000 sec
D11      0.0300000 sec
TDO      1

===== CHANNEL f1 =====
SF01     125.9513451 MHz
NUC1     13C
P1       10.00 usec
PLW1     71.00000000 W

===== CHANNEL f2 =====
SF02     499.2610621 MHz
NUC2     1H
CPDPRG2  waltz16
PCPD2    80.00 usec
PLW2     17.00000000 W
PLW12    0.26563001 W
PLW13    0.17000000 W

F2 - Processing parameters
SI       32768
SF       125.5387918 MHz
WDW      EM
SSB      0
LB       1.00 Hz
GB       0
PC       1.40
    
```



<sup>1</sup>H NMR (500 MHz, MeOH-d<sub>4</sub>), (*R*)-2-amino-3-(1*H*-imidazol-4-yl)-*N*-(quinolin-8-yl)propanamide (**11b**):

SR 24-1 d

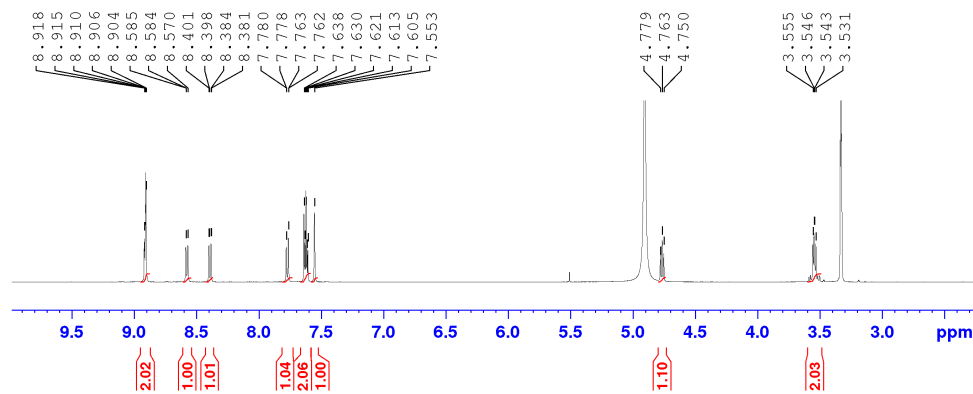

```

Current Data Parameters
NAME      Nov15-2019-P1lab
EXPNO    10
PROCNO   1

F2 - Acquisition Parameters
Date_    20191115
Time     8.59
INSTRUM  spect
PROBHD   5 mm PABBO BB/
PULPROG  zg30
TD        65536
SOLVENT  MeOH
NS        16
DS        2
SWH       9973.404 Hz
FIDRES    0.152182 Hz
AQ        3.285382 sec
RG        170.03
DW        50.133 usec
DE        6.50 usec
TE        298.0 K
D1        6.0000000 sec
TD0       1

===== CHANNEL f1 =====
SF01     499.2621482 MHz
NUC1     1H
P1       10.00 usec
PLW1    17.00000000 W

F2 - Processing parameters
SI        65536
SF        499.2590651 MHz
WDW       EM
SSB       0
LB        0.30 Hz
GB        0
PC        1.00
    
```

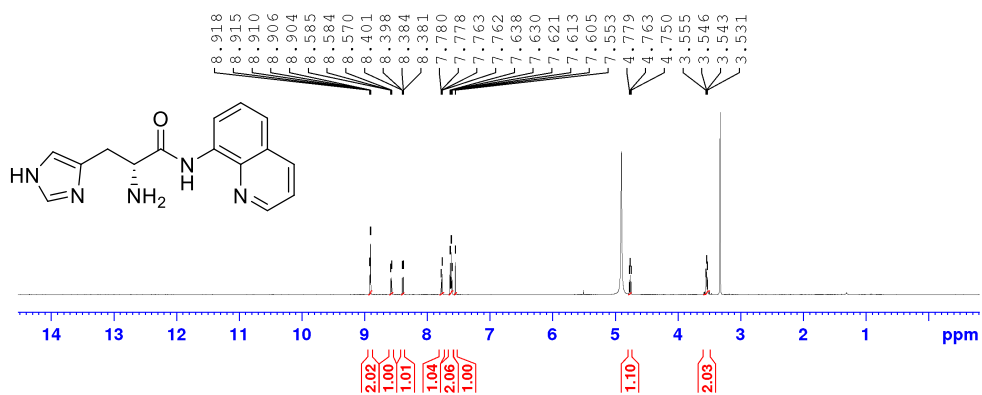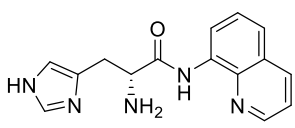

<sup>13</sup>C NMR (126 MHz, MeOH-d<sub>4</sub>), (R)-2-amino-3-(1H-imidazol-4-yl)-N-(quinolin-8-yl)propanamide (**11b**):

SR 24 -1 d 13C

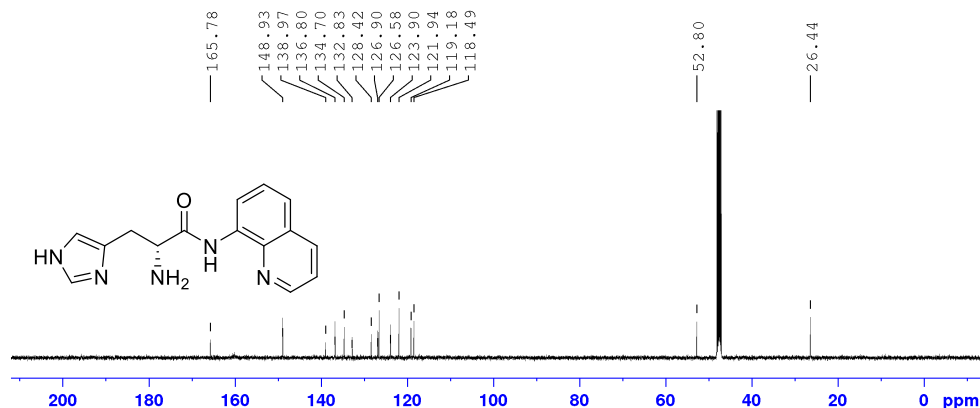

```
Current Data Parameters
NAME      Nov15-2019-PTlab
EXPNO     30
PROCNO    1

F2 - Acquisition Parameters
Date_     20191115
Time      19.53
INSTRUM   spect
PROBHD    5 mm PABBO BB/
PULPROG   zgpg30
TD         65536
SOLVENT   MeOD
NS         312
DS         4
SWH        29761.904 Hz
FIDRES     0.454131 Hz
AQ         1.1010048 sec
RG         191.52
DW         16.800 usec
DE         10.00 usec
TE         300.0 K
D1         2.0000000 sec
D11        0.03000000 sec
TD0        1

===== CHANNEL f1 =====
SFO1      125.5513451 MHz
NUC1       13C
PL        10.00 usec
PLW1      71.00000000 W

===== CHANNEL f2 =====
SFO2      499.2610621 MHz
NUC2       1H
CPDPRG[2] waltz16
PCPD2     80.00 usec
PLW2      17.00000000 W
PLW12     0.26563001 W
PLW13     0.17000000 W

F2 - Processing parameters
SI         32768
SF         125.5387918 MHz
WDW        EM
SSB        0
LB         1.00 Hz
GB         0
PC         1.40
```

## HPLC Chromatograms of Final Compounds

(S)-2-amino-3-(1H-imidazol-4-yl)-N-phenethylpropanamide (4c)

Sample Name: PSK14

=====

|                                      |                        |
|--------------------------------------|------------------------|
| Acq. Operator : SYSTEM               | Seq. Line : 28         |
| Acq. Instrument : 1220 HPLC          | Location : 80          |
| Injection Date : 1/7/2021 7:33:06 AM | Inj : 1                |
|                                      | Inj Volume : 50.000 µl |

Different Inj Volume from Sample Entry! Actual Inj Volume : 30.000 µl

Method : C:\Chem32\1\Data\Audifas 2021-01-06 19-03-34\Wash\_Shafikur.M (Sequence Method)

Last changed : 1/6/2021 7:13:21 PM by SYSTEM

Method Info : Methanol/Water TFA 0.05 %

Sample Info : PSK14

Additional Info : Peak(s) manually integrated

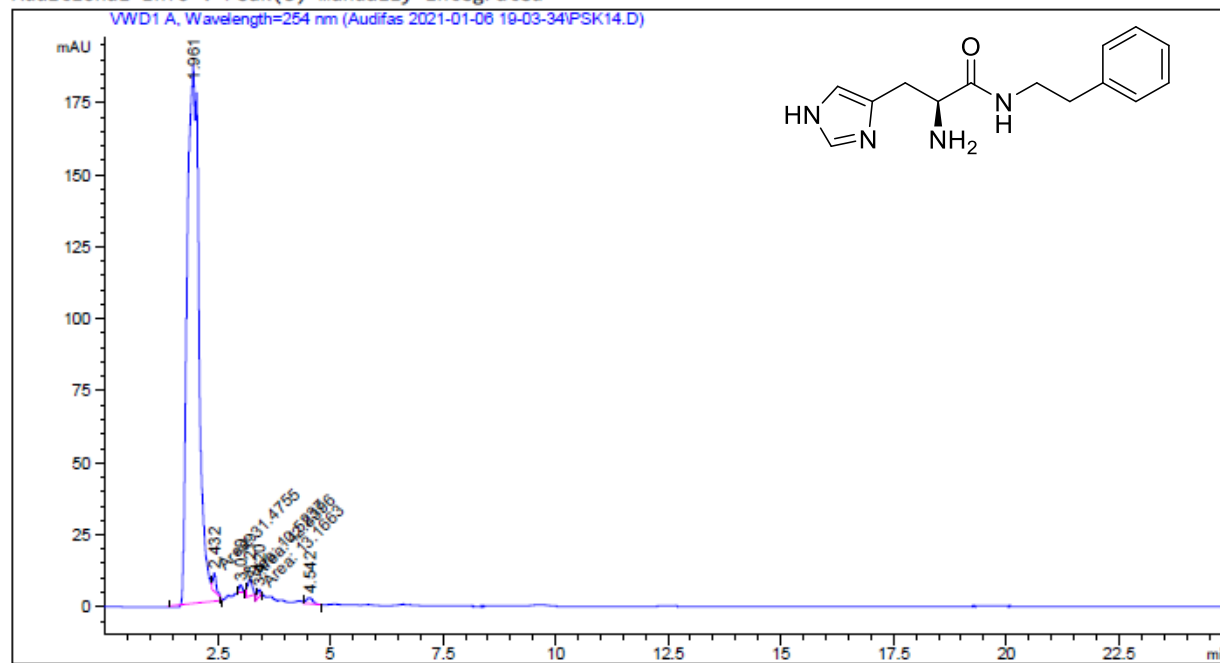

=====  
Area Percent Report  
=====

Sorted By : Signal  
Multiplier : 1.0000  
Dilution : 1.0000  
Use Multiplier & Dilution Factor with ISTDs

Signal 1: VWD1 A, Wavelength=254 nm

| Peak # | RetTime [min] | Type | Width [min] | Area [mAU*s] | Height [mAU] | Area %  |
|--------|---------------|------|-------------|--------------|--------------|---------|
| 1      | 1.961         | MM R | 0.3806      | 3403.53442   | 186.91812    | 96.6275 |
| 2      | 2.432         | MM T | 0.0827      | 31.47550     | 6.34564      | 0.8936  |
| 3      | 3.010         | MM T | 0.0727      | 10.52366     | 2.41180      | 0.2988  |
| 4      | 3.219         | MM T | 0.1242      | 42.83961     | 5.74662      | 1.2162  |

**(R)-2-amino-3-(1H-imidazol-4-yl)-N-phenethylpropanamide(4d)**

Sample Name: PSK

=====

|                                      |                        |
|--------------------------------------|------------------------|
| Acq. Operator : SYSTEM               | Seq. Line : 31         |
| Acq. Instrument : 1220 HPLC          | Location : 81          |
| Injection Date : 1/7/2021 8:55:48 AM | Inj : 1                |
|                                      | Inj Volume : 50.000 µl |

Different Inj Volume from Sample Entry! Actual Inj Volume : 30.000 µl

Method : C:\Chem32\1\Data\Audifas 2021-01-06 19-03-34\Wash\_Shafikur.M (Sequence Method)

Last changed : 1/6/2021 7:13:21 PM by SYSTEM

Method Info : Methanol/Water TFA 0.05 %

Sample Info : PSK3

Additional Info : Peak(s) manually integrated

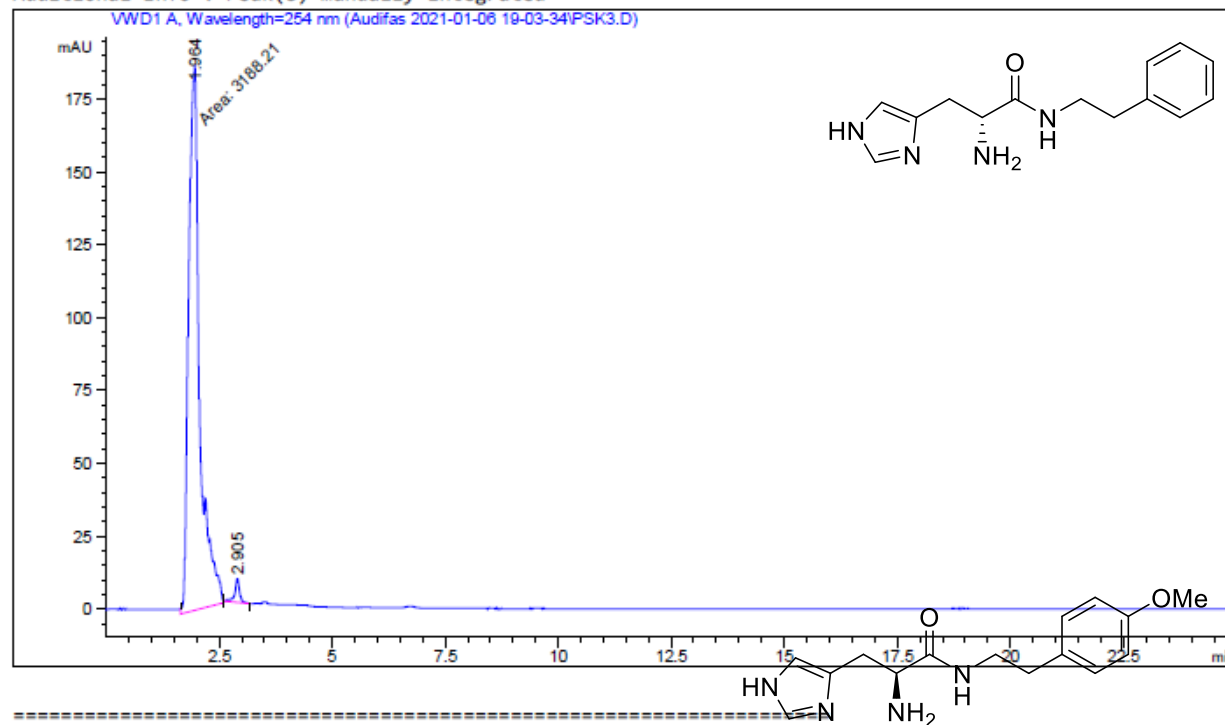

=====  
Area Percent Report  
=====

Sorted By : Signal  
Multiplier : 1.0000  
Dilution : 1.0000  
Use Multiplier & Dilution Factor with ISTDs

Signal 1: VWD1 A, Wavelength=254 nm

| Peak # | RetTime [min] | Type | Width [min] | Area [mAU*s] | Height [mAU] | Area %  |
|--------|---------------|------|-------------|--------------|--------------|---------|
| 1      | 1.964         | MM T | 0.3095      | 3188.21191   | 186.93040    | 98.1449 |
| 2      | 2.905         | BB   | 0.1058      | 60.26109     | 8.05252      | 1.8551  |

Totals : 3248.47301 194.98293

=====  
Area Percent Report  
=====

Sorted By : Signal  
Multiplier : 1.0000  
Dilution : 1.0000  
Use Multiplier & Dilution Factor with ISTDs

Signal 1: VWD1 A, Wavelength=254 nm

# (R)-2-amino-3-(1H-imidazol-4-yl)-N-(4-methoxyphenethyl)propanamide (4f):

Sample Name: SR 69-1 d

=====

|                 |                         |            |             |
|-----------------|-------------------------|------------|-------------|
| Acq. Operator   | : SYSTEM                | Seq. Line  | : 1         |
| Acq. Instrument | : HPLC                  | Location   | : Vial 1    |
| Injection Date  | : 12/16/2020 5:26:00 PM | Inj        | : 1         |
|                 |                         | Inj Volume | : 20.000 µl |

Sequence File : C:\Chem32\1\DATA\Ao\KK 2020-12-16 17-24-50\KK.S  
Method : C:\CHEM32\1\DATA\AO\KK 2020-12-16 17-24-50\CQ.M (Sequence Method)  
Last changed : 12/16/2020 5:24:50 PM by SYSTEM

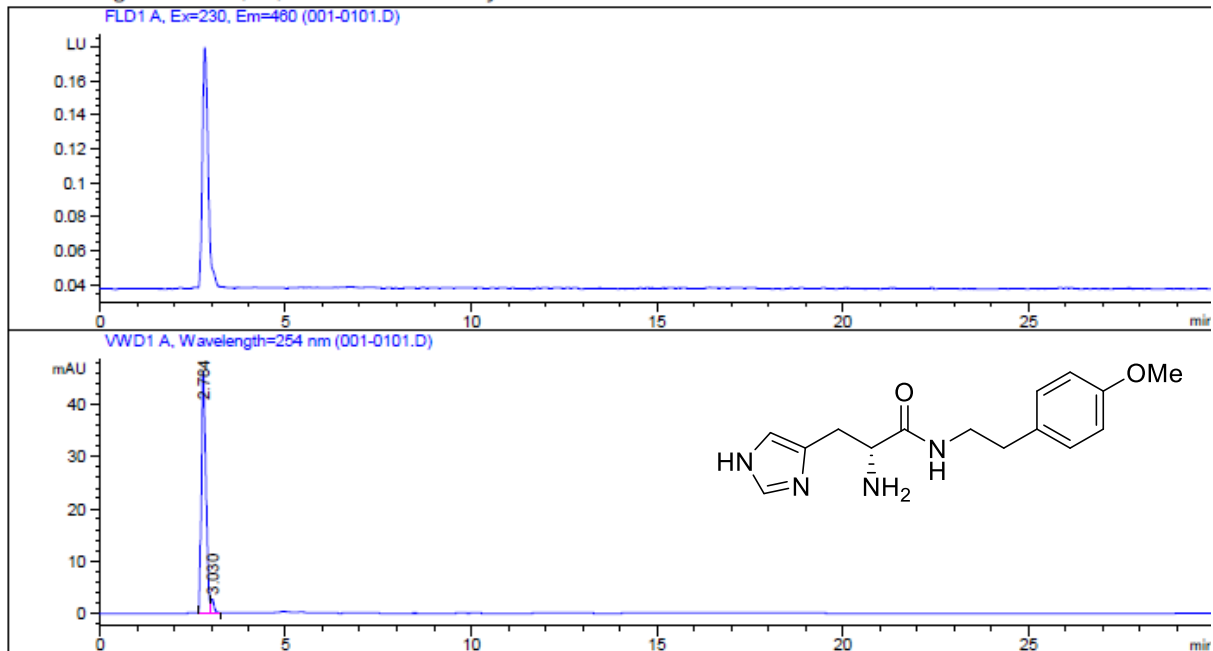

=====

### Area Percent Report

=====

Sorted By : Signal  
Multiplier : 1.0000  
Dilution : 1.0000  
Do not use Multiplier & Dilution Factor with ISTDs

Signal 1: FLD1 A, Ex=230, Em=460

Signal 2: VWD1 A, Wavelength=254 nm

| Peak # | RetTime [min] | Type | Width [min] | Area [mAU*s] | Height [mAU] | Area %  |
|--------|---------------|------|-------------|--------------|--------------|---------|
| 1      | 2.784         | BV   | 0.1141      | 388.43942    | 46.19957     | 96.1296 |
| 2      | 3.030         | VB   | 0.0900      | 15.63965     | 2.60797      | 3.8704  |

Totals : 404.07908 48.80754

Signal 1: VWD1 A, Wavelength=254 nm

| Peak # | RetTime [min] | Type | Width [min] | Area [mAU*s] | Height [mAU] | Area %   |
|--------|---------------|------|-------------|--------------|--------------|----------|
| 1      | 2.741         | BB   | 0.2070      | 2580.59741   | 184.69226    | 100.0000 |

Totals : 2580.59741 184.69226









(S)-2-amino-3-(1H-imidazol-4-yl)-N-(4-(trifluoromethyl)phenethyl)propanamide

Sample Name: PSK1d

=====

|                 |                       |            |             |
|-----------------|-----------------------|------------|-------------|
| Acq. Operator   | : SYSTEM              | Seq. Line  | : 8         |
| Acq. Instrument | : 1220 HPLC           | Location   | : 57        |
| Injection Date  | : 2/3/2021 6:26:56 PM | Inj        | : 1         |
|                 |                       | Inj Volume | : 50.000 µl |

Different Inj Volume from Sample Entry! Actual Inj Volume : 30.000 µl

Method : C:\Chem32\1\Data\Audifas 2021-02-03 15-12-48\Wash\_Shafikur.M (Sequence Method)

Last changed : 2/3/2021 3:12:52 PM by SYSTEM

Method Info : Methanol/Water 0.05 % TFA

Sample Info : PSK1d

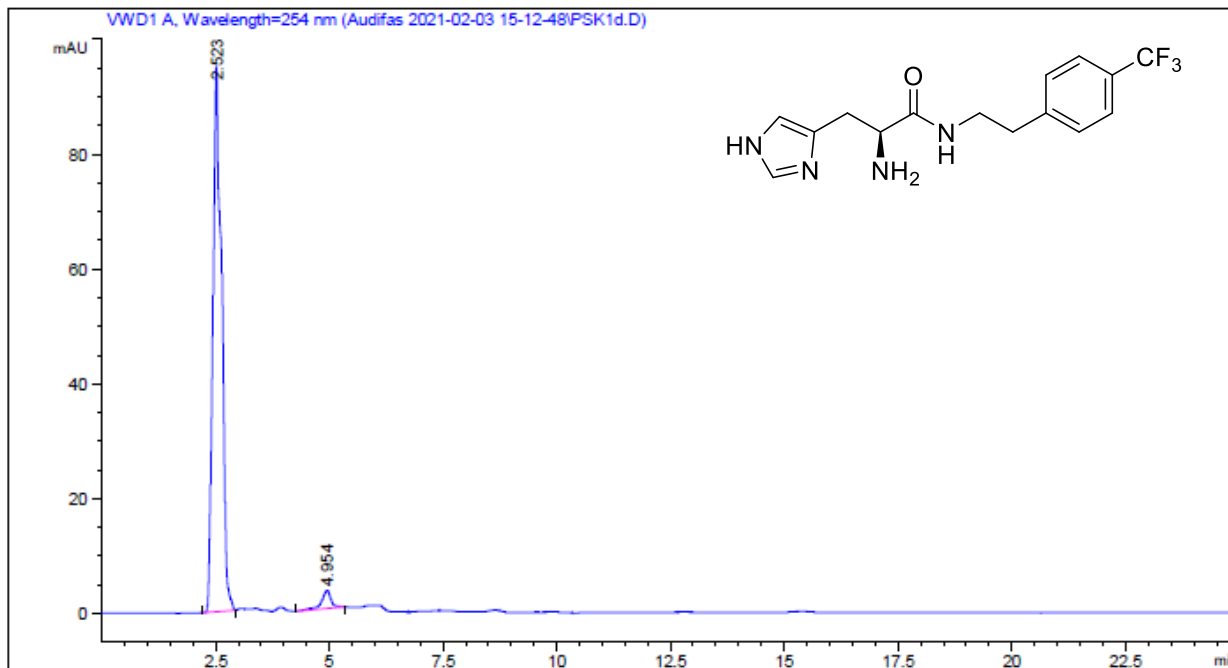

=====  
Area Percent Report  
=====

Sorted By : Signal  
Multiplier : 1.0000  
Dilution : 1.0000  
Use Multiplier & Dilution Factor with ISTDs

Signal 1: WWD1 A, Wavelength=254 nm

| Peak #   | RetTime [min] | Type | Width [min] | Area [mAU*s] | Height [mAU] | Area %  |
|----------|---------------|------|-------------|--------------|--------------|---------|
| 1        | 2.523         | BB   | 0.1667      | 1255.20386   | 95.25862     | 96.4839 |
| 2        | 4.954         | BV R | 0.1736      | 45.74269     | 3.13797      | 3.5161  |
| Totals : |               |      |             | 1300.94654   | 98.39659     |         |

(R)-2-amino-3-(1H-imidazol-4-yl)-N-(4-(trifluoromethyl)phenethyl)propanamide

Sample Name: PSK 2d

=====

|                                       |                        |
|---------------------------------------|------------------------|
| Acq. Operator : SYSTEM                | Seq. Line : 1          |
| Acq. Instrument : HPLC                | Location : Vial 3      |
| Injection Date : 2/22/2021 3:58:14 PM | Inj : 1                |
|                                       | Inj Volume : 20.000 µl |

Sequence File : C:\Chem32\1\DATA\Ao\KK 2021-02-22 15-57-07\KK.S  
Method : C:\CHEM32\1\DATA\AO\KK 2021-02-22 15-57-07\CQ.M (Sequence Method)  
Last changed : 2/22/2021 3:57:07 PM by SYSTEM

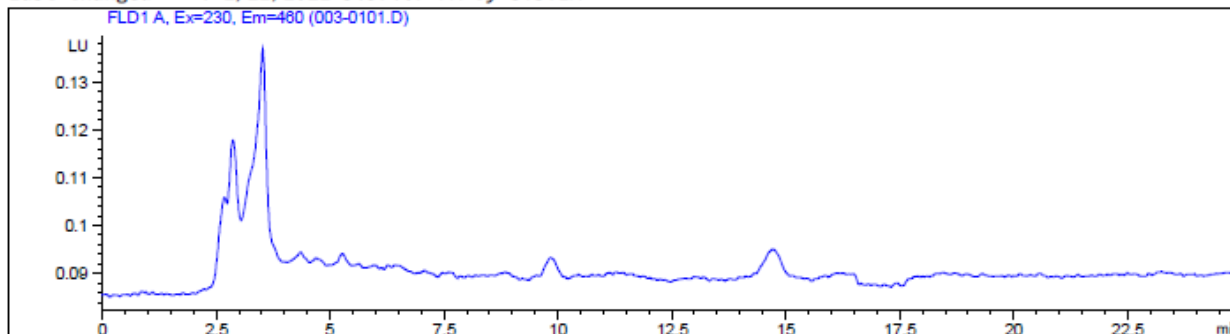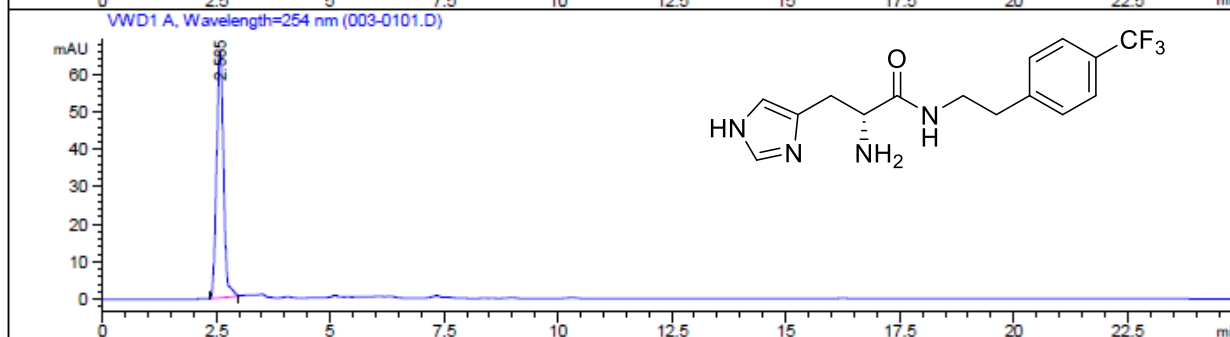

=====  
Area Percent Report  
=====

Sorted By : Signal  
Multiplier : 1.0000  
Dilution : 1.0000  
Do not use Multiplier & Dilution Factor with ISTDs

Signal 1: FLD1 A, Ex=230, Em=460

Signal 2: VWD1 A, Wavelength=254 nm

| Peak # | RetTime [min] | Type | Width [min] | Area [mAU*s] | Height [mAU] | Area %   |
|--------|---------------|------|-------------|--------------|--------------|----------|
| 1      | 2.585         | BB   | 0.1574      | 694.42896    | 65.67966     | 100.0000 |

Totals : 694.42896 65.67966



**(R)-2-amino-N-(4-fluorophenethyl)-3-(1H-imidazol-4-yl)propanamide (4n)**

Sample Name: KS-94-d

=====

|                                                                            |                        |
|----------------------------------------------------------------------------|------------------------|
| Acq. Operator : SYSTEM                                                     | Seq. Line : 1          |
| Acq. Instrument : HPLC                                                     | Location : Vial 1      |
| Injection Date : 12/9/2020 1:13:27 PM                                      | Inj : 1                |
|                                                                            | Inj Volume : 20.000 µl |
| Sequence File : C:\Chem32\1\DATA\Ao\KK 2020-12-09 13-12-18\KK.S            |                        |
| Method : C:\CHEM32\1\DATA\AO\KK 2020-12-09 13-12-18\CQ.M (Sequence Method) |                        |
| Last changed : 12/9/2020 1:12:19 PM by SYSTEM                              |                        |

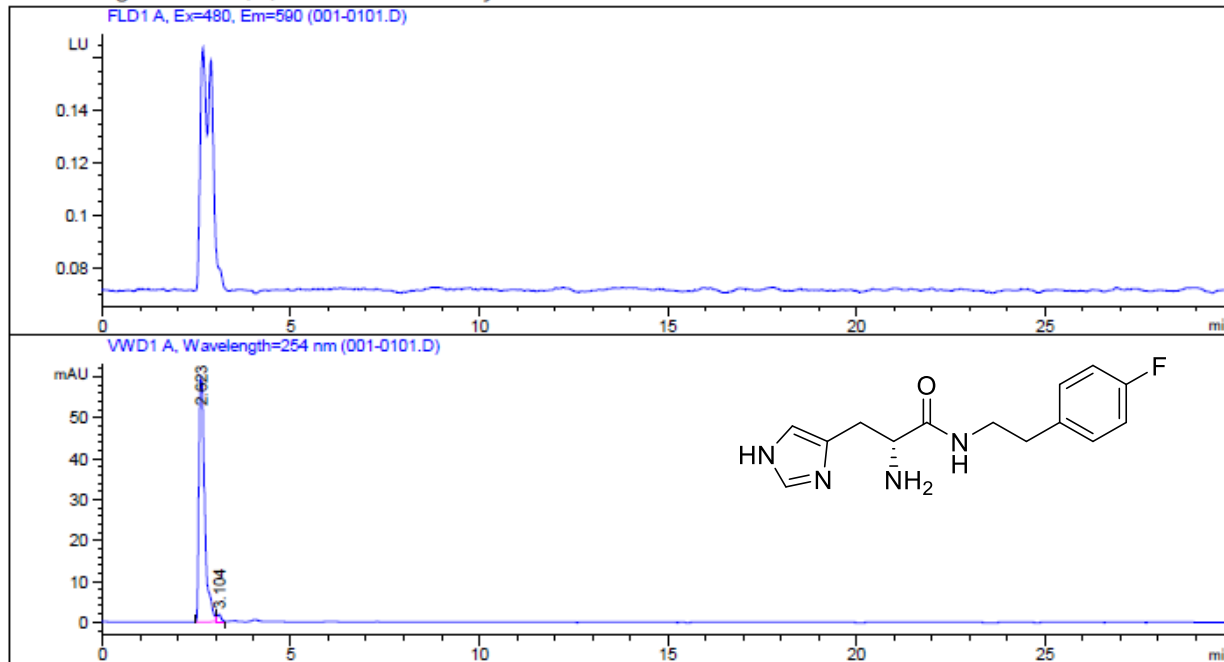

=====  
Area Percent Report  
=====

Sorted By : Signal  
Multiplier : 1.0000  
Dilution : 1.0000  
Use Multiplier & Dilution Factor with ISTDs

Signal 1: FLD1 A, Ex=480, Em=590

Signal 2: WVD1 A, Wavelength=254 nm

| Peak # | RetTime [min] | Type | Width [min] | Area [mAU*s] | Height [mAU] | Area %  |
|--------|---------------|------|-------------|--------------|--------------|---------|
| 1      | 2.623         | BV   | 0.1662      | 643.78772    | 59.96936     | 97.8111 |
| 2      | 3.104         | VB   | 0.1187      | 14.40736     | 1.70374      | 2.1889  |

Totals : 658.19508 61.67310



**(R)-2-amino-3-(1H-imidazol-4-yl)-N-(4-nitrophenethyl)propanamide (4p)**

Sample Name: SR-32-1d

=====

|                                                                       |                                                                                  |            |             |
|-----------------------------------------------------------------------|----------------------------------------------------------------------------------|------------|-------------|
| Acq. Operator                                                         | : SYSTEM                                                                         | Seq. Line  | : 17        |
| Acq. Instrument                                                       | : 1220 HPLC                                                                      | Location   | : 71        |
| Injection Date                                                        | : 1/7/2021 2:29:57 AM                                                            | Inj        | : 1         |
|                                                                       |                                                                                  | Inj Volume | : 50.000 µl |
| Different Inj Volume from Sample Entry! Actual Inj Volume : 30.000 µl |                                                                                  |            |             |
| Method                                                                | : C:\Chem32\1\Data\Audifas 2021-01-06 19-03-34\Wash_Shafikur.M (Sequence Method) |            |             |
| Last changed                                                          | : 1/6/2021 7:13:21 PM by SYSTEM                                                  |            |             |
| Method Info                                                           | : Methanol/Water TFA 0.05 %                                                      |            |             |
| Sample Info                                                           | : SR-32-1d                                                                       |            |             |

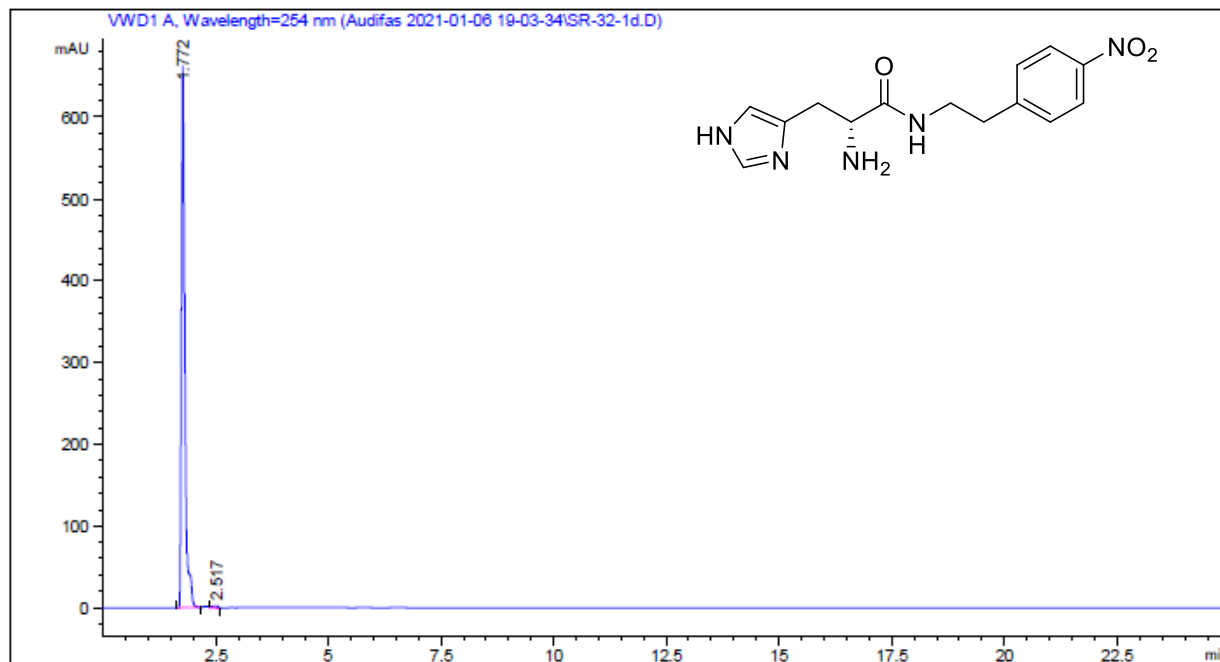

=====  
Area Percent Report  
=====

Sorted By : Signal  
Multiplier : 1.0000  
Dilution : 1.0000  
Use Multiplier & Dilution Factor with ISTDs

Signal 1: WWD1 A, Wavelength=254 nm

| Peak # | RetTime [min] | Type | Width [min] | Area [mAU*s] | Height [mAU] | Area %  |
|--------|---------------|------|-------------|--------------|--------------|---------|
| 1      | 1.772         | BB   | 0.0818      | 3541.53955   | 662.76624    | 99.4130 |
| 2      | 2.517         | VB   | 0.1131      | 20.91246     | 2.46200      | 0.5870  |

Totals : 3562.45201 665.22823

(S)-N-(2-([1,1'-biphenyl]-4-yl)ethyl)-2-amino-3-(1H-imidazol-4-yl)propanamide

Sample Name: SR 21-1 d

=====

|                 |                        |            |             |
|-----------------|------------------------|------------|-------------|
| Acq. Operator   | : SYSTEM               | Seq. Line  | : 4         |
| Acq. Instrument | : 1220 HPLC            | Location   | : 22        |
| Injection Date  | : 1/12/2021 4:30:41 PM | Inj        | : 1         |
|                 |                        | Inj Volume | : 50.000 µl |

Different Inj Volume from Sample Entry! Actual Inj Volume : 10.000 µl

Method : C:\Chem32\1\Data\Audifas 2021-01-12 15-16-20\Wash\_Shafikur.M (Sequence Method)

Last changed : 1/12/2021 3:16:24 PM by SYSTEM

Method Info : Methanol/Water TFA 0.05 %

Sample Info : SR 21-1 d AG

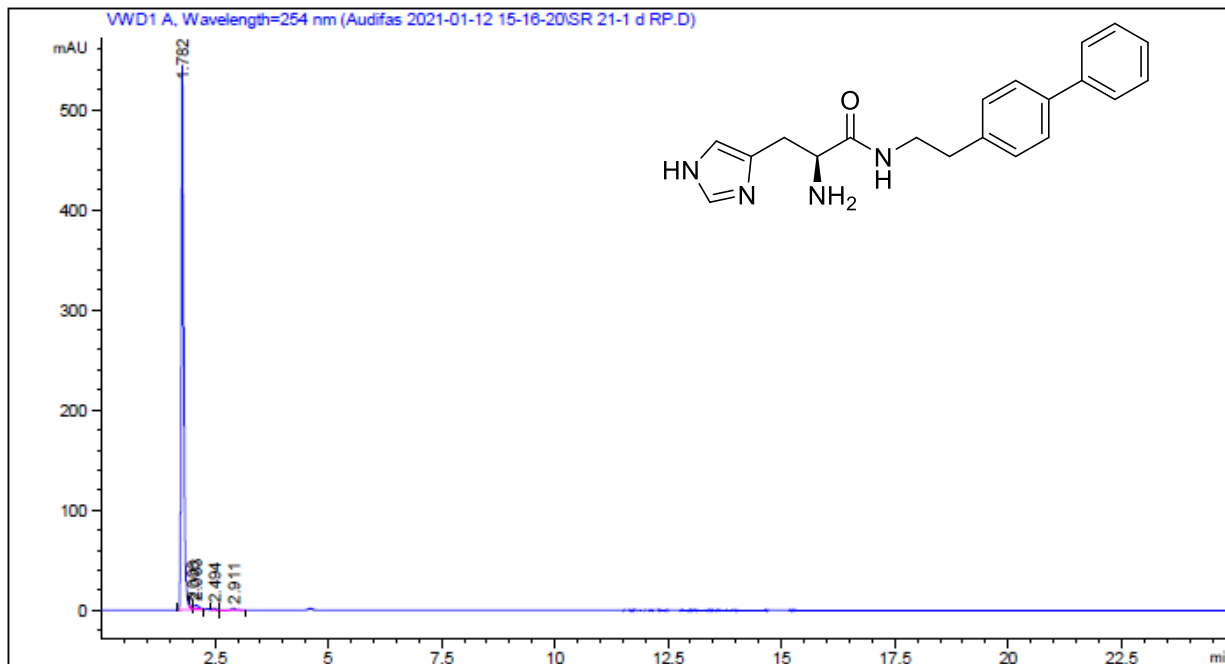

=====  
Area Percent Report  
=====

Sorted By : Signal  
Multiplier : 1.0000  
Dilution : 1.0000  
Use Multiplier & Dilution Factor with ISTDs

Signal 1: VWD1 A, Wavelength=254 nm

| Peak # | RetTime [min] | Type | Width [min] | Area [mAU*s] | Height [mAU] | Area %  |
|--------|---------------|------|-------------|--------------|--------------|---------|
| 1      | 1.782         | BV R | 0.0580      | 2096.91895   | 544.23639    | 96.8984 |
| 2      | 2.006         | VV E | 0.0471      | 10.06466     | 2.57519      | 0.4651  |
| 3      | 2.083         | VB E | 0.0908      | 29.99245     | 4.43780      | 1.3859  |
| 4      | 2.494         | VB   | 0.0694      | 9.51005      | 1.88400      | 0.4395  |
| 5      | 2.911         | BB   | 0.1261      | 17.55167     | 1.74936      | 0.8111  |



(R)-N-(2-([1,1'-biphenyl]-4-yl)ethyl)-2-amino-3-(1H-imidazol-4-yl)propanamide

Sample Name: SR 22-2 d

=====

|                                                                       |                                                                                  |            |             |
|-----------------------------------------------------------------------|----------------------------------------------------------------------------------|------------|-------------|
| Acq. Operator                                                         | : SYSTEM                                                                         | Seq. Line  | : 5         |
| Acq. Instrument                                                       | : 1220 HPLC                                                                      | Location   | : 31        |
| Injection Date                                                        | : 1/12/2021 4:57:57 PM                                                           | Inj        | : 1         |
|                                                                       |                                                                                  | Inj Volume | : 50.000 µl |
| Different Inj Volume from Sample Entry! Actual Inj Volume : 10.000 µl |                                                                                  |            |             |
| Method                                                                | : C:\Chem32\1\Data\Audifas 2021-01-12 15-16-20\Wash_Shafikur.M (Sequence Method) |            |             |
| Last changed                                                          | : 1/12/2021 3:16:24 PM by SYSTEM                                                 |            |             |
| Method Info                                                           | : Methanol/Water TFA 0.05 %                                                      |            |             |

Sample Info : SR 22-2 d

Additional Info : Peak(s) manually integrated

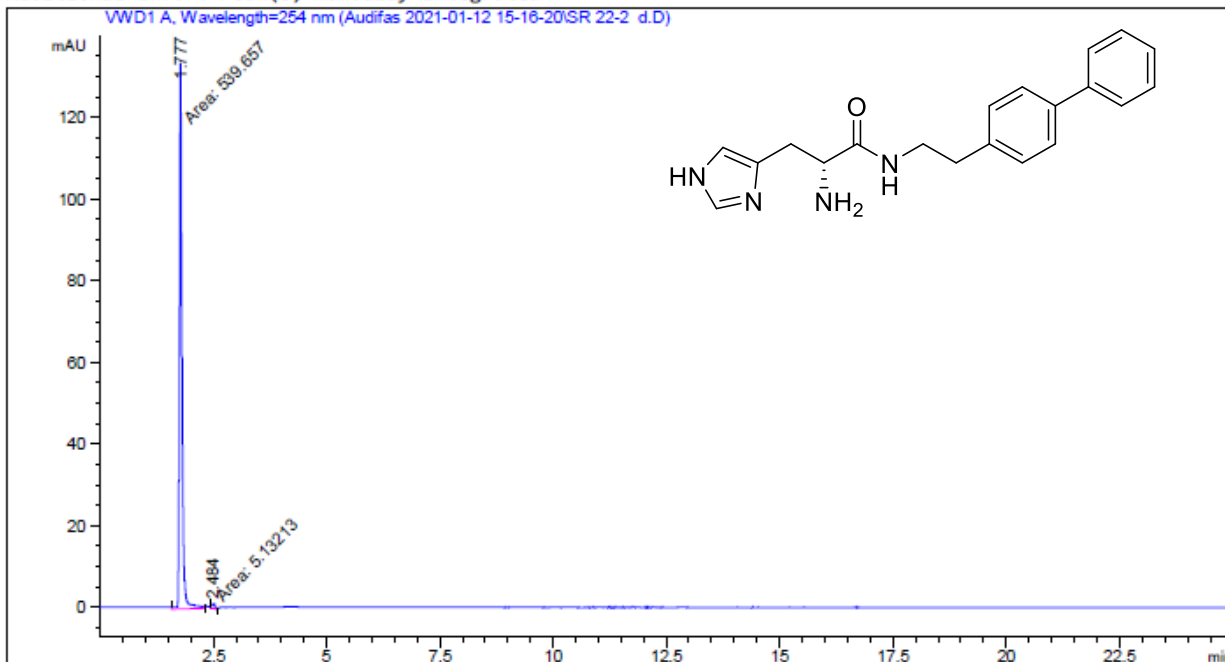

=====  
Area Percent Report  
=====

Sorted By : Signal  
Multiplier : 1.0000  
Dilution : 1.0000  
Use Multiplier & Dilution Factor with ISTDs

Signal 1: WWD1 A, Wavelength=254 nm

| Peak # | RetTime [min] | Type | Width [min] | Area [mAU*s] | Height [mAU] | Area %  |
|--------|---------------|------|-------------|--------------|--------------|---------|
| 1      | 1.777         | MM T | 0.0673      | 539.65656    | 133.61414    | 99.0580 |
| 2      | 2.484         | MM T | 0.0795      | 5.13213      | 1.07656      | 0.9420  |

Totals : 544.78869 134.69069

(S)-2-amino-N-benzyl-3-(1H-imidazol-4-yl)propanamide (5a)

Sample Name: KS100d

```

=====
Acq. Operator   : SYSTEM                      Seq. Line :    3
Acq. Instrument : 1220 HPLC                   Location  :   52
Injection Date  : 2/3/2021 4:09:20 PM        Inj       :    1
                                           Inj Volume: 50.000 µl
Different Inj Volume from Sample Entry! Actual Inj Volume : 30.000 µl
Method          : C:\Chem32\1\Data\Audifas 2021-02-03 15-12-48\Wash_Shafikur.M (Sequence
                : Method)
Last changed    : 2/3/2021 3:12:52 PM by SYSTEM
Method Info     : Methanol/Water 0.05 % TFA

```

Sample Info : KS100d

Additional Info : Peak(s) manually integrated

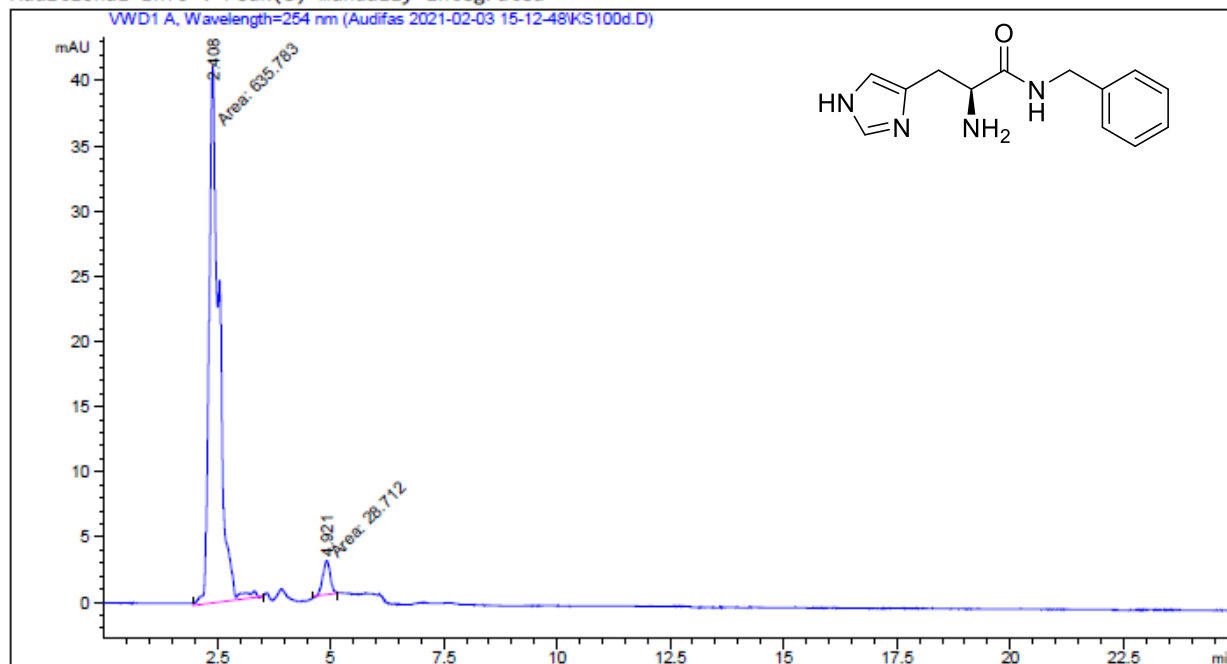

```

=====
Area Percent Report
=====

```

```

Sorted By       :      Signal
Multiplier      :      1.0000
Dilution        :      1.0000
Use Multiplier & Dilution Factor with ISTDs

```

Signal 1: WWD1 A, Wavelength=254 nm

| Peak # | RetTime [min] | Type | Width [min] | Area [mAU*s] | Height [mAU] | Area %  |
|--------|---------------|------|-------------|--------------|--------------|---------|
| 1      | 2.408         | MM T | 0.2569      | 635.78271    | 41.24117     | 95.6791 |
| 2      | 4.921         | MM T | 0.2197      | 28.71196     | 2.57889      | 4.3209  |

```
Totals :                664.49468  43.82006
```

(S)-2-amino-3-(1H-3l4-imidazol-4-yl)-N-(4-methoxybenzyl)propanamide (5b)

Sample Name: SR 20-2d

=====

|                 |                         |            |             |
|-----------------|-------------------------|------------|-------------|
| Acq. Operator   | : SYSTEM                | Seq. Line  | : 7         |
| Acq. Instrument | : 1220 HPLC             | Location   | : 47        |
| Injection Date  | : 12/29/2020 5:01:24 PM | Inj        | : 1         |
|                 |                         | Inj Volume | : 50.000 µl |

Different Inj Volume from Sample Entry! Actual Inj Volume : 25.000 µl

Method : C:\Chem32\1\Data\Audifas 2020-12-29 14-08-47\Wash\_Shafikur.M (Sequence Method)

Last changed : 12/29/2020 2:08:51 PM by SYSTEM

Method Info : Wash\_Shafikur Water 0.05 %TFA / Methanol

Sample Info : SR20-2d

Additional Info : Peak(s) manually integrated

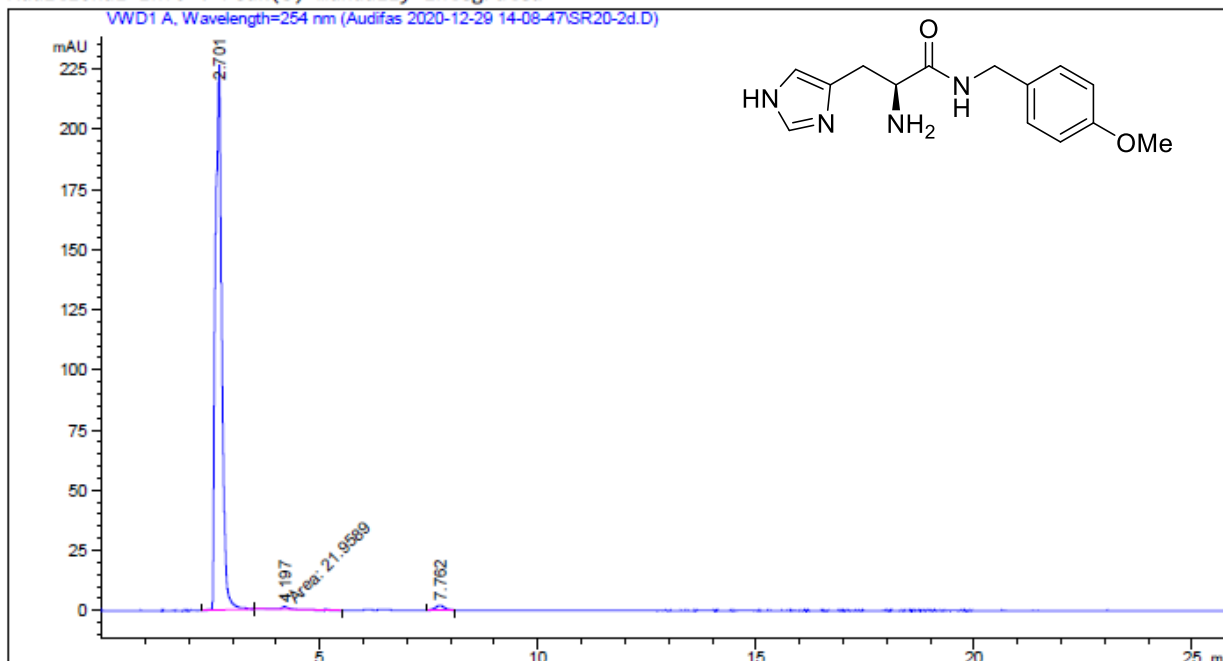

=====  
Area Percent Report  
=====

Sorted By : Signal  
Multiplier : 1.0000  
Dilution : 1.0000  
Use Multiplier & Dilution Factor with ISTDs

Signal 1: VWD1 A, Wavelength=254 nm

| Peak # | RetTime [min] | Type | Width [min] | Area [mAU*s] | Height [mAU] | Area %  |
|--------|---------------|------|-------------|--------------|--------------|---------|
| 1      | 2.701         | BB   | 0.1384      | 2328.67993   | 226.55333    | 97.8858 |
| 2      | 4.197         | MM   | 0.3148      | 21.95889     | 1.16269      | 0.9230  |
| 3      | 7.762         | BB   | 0.1733      | 28.33842     | 1.92964      | 1.1912  |

(R)-2-amino-3-(1H-imidazol-4-yl)-N-(4-methoxybenzyl)propanamide (5c)

Sample Name: PSK 12

=====

|                                                                            |                        |
|----------------------------------------------------------------------------|------------------------|
| Acq. Operator : SYSTEM                                                     | Seq. Line : 1          |
| Acq. Instrument : HPLC                                                     | Location : Vial 2      |
| Injection Date : 2/25/2021 12:14:50 PM                                     | Inj : 1                |
|                                                                            | Inj Volume : 20.000 µl |
| Sequence File : C:\Chem32\1\DATA\Ao\KK 2021-02-25 12-13-42\KK.S            |                        |
| Method : C:\CHEM32\1\DATA\AO\KK 2021-02-25 12-13-42\CQ.M (Sequence Method) |                        |
| Last changed : 2/25/2021 12:13:42 PM by SYSTEM                             |                        |

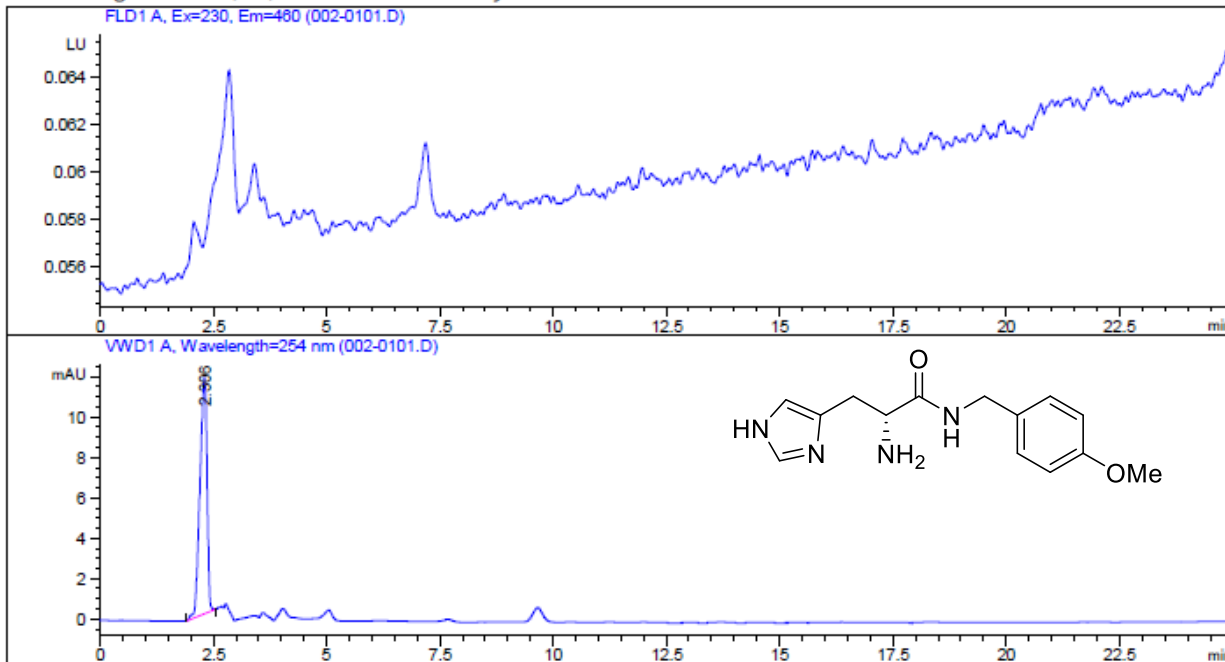

=====  
Area Percent Report  
=====

Sorted By : Signal  
Multiplier : 1.0000  
Dilution : 1.0000  
Do not use Multiplier & Dilution Factor with ISTDs

Signal 1: FLD1 A, Ex=230, Em=460

Signal 2: VWD1 A, Wavelength=254 nm

| Peak # | RetTime [min] | Type | Width [min] | Area [mAU*s] | Height [mAU] | Area %   |
|--------|---------------|------|-------------|--------------|--------------|----------|
| 1      | 2.306         | BB   | 0.1743      | 127.70169    | 11.70746     | 100.0000 |

Totals : 127.70169 11.70746







(R)-2-amino-3-(1H-3/4-imidazol-4-yl)-N-(3-methoxybenzyl)propanamide (5g)

Sample Name: SR 70-1 d

=====

|                                        |                        |
|----------------------------------------|------------------------|
| Acq. Operator : SYSTEM                 | Seq. Line : 1          |
| Acq. Instrument : HPLC                 | Location : Vial 1      |
| Injection Date : 12/16/2020 6:24:12 PM | Inj : 1                |
|                                        | Inj Volume : 20.000 µl |

Sequence File : C:\Chem32\1\DATA\AO\KK 2020-12-16 18-23-04\KK.S  
Method : C:\CHEM32\1\DATA\AO\KK 2020-12-16 18-23-04\CQ.M (Sequence Method)  
Last changed : 12/16/2020 6:23:05 PM by SYSTEM

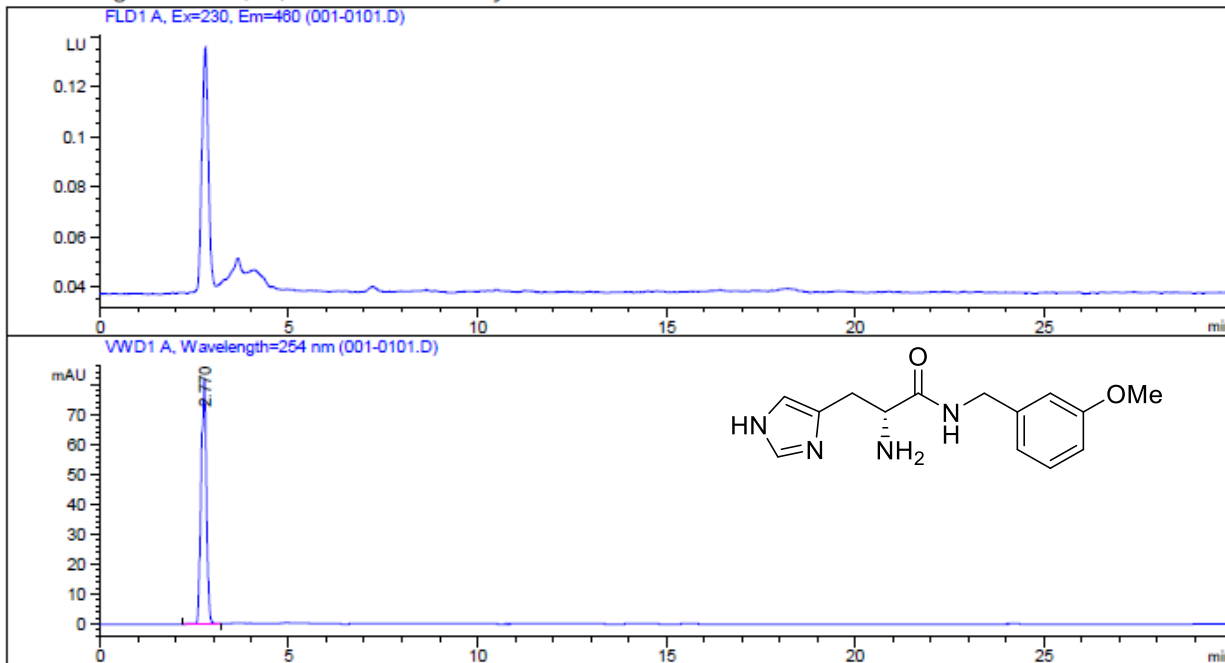

=====  
Area Percent Report  
=====

Sorted By : Signal  
Multiplier : 1.0000  
Dilution : 1.0000  
Do not use Multiplier & Dilution Factor with ISTDs

Signal 1: FLD1 A, Ex=230, Em=460

Signal 2: VWD1 A, Wavelength=254 nm

| Peak # | RetTime [min] | Type | Width [min] | Area [mAU*s] | Height [mAU] | Area %   |
|--------|---------------|------|-------------|--------------|--------------|----------|
| 1      | 2.770         | BB   | 0.1274      | 790.94592    | 82.10738     | 100.0000 |

Totals : 790.94592 82.10738



(S)-2-amino-3-(1H-imidazol-4-yl)-N-(4-(trifluoromethyl)benzyl)propanamide (5h)

Sample Name: PSK 6d

=====

|                                                                            |                        |
|----------------------------------------------------------------------------|------------------------|
| Acq. Operator : SYSTEM                                                     | Seq. Line : 1          |
| Acq. Instrument : HPLC                                                     | Location : Vial 3      |
| Injection Date : 2/25/2021 3:26:35 PM                                      | Inj : 1                |
|                                                                            | Inj Volume : 50.000 µl |
| Sequence File : C:\Chem32\1\DATA\Ao\KK 2021-02-25 15-25-11\KK.S            |                        |
| Method : C:\CHEM32\1\DATA\AO\KK 2021-02-25 15-25-11\CQ.M (Sequence Method) |                        |
| Last changed : 2/25/2021 3:25:11 PM by SYSTEM                              |                        |

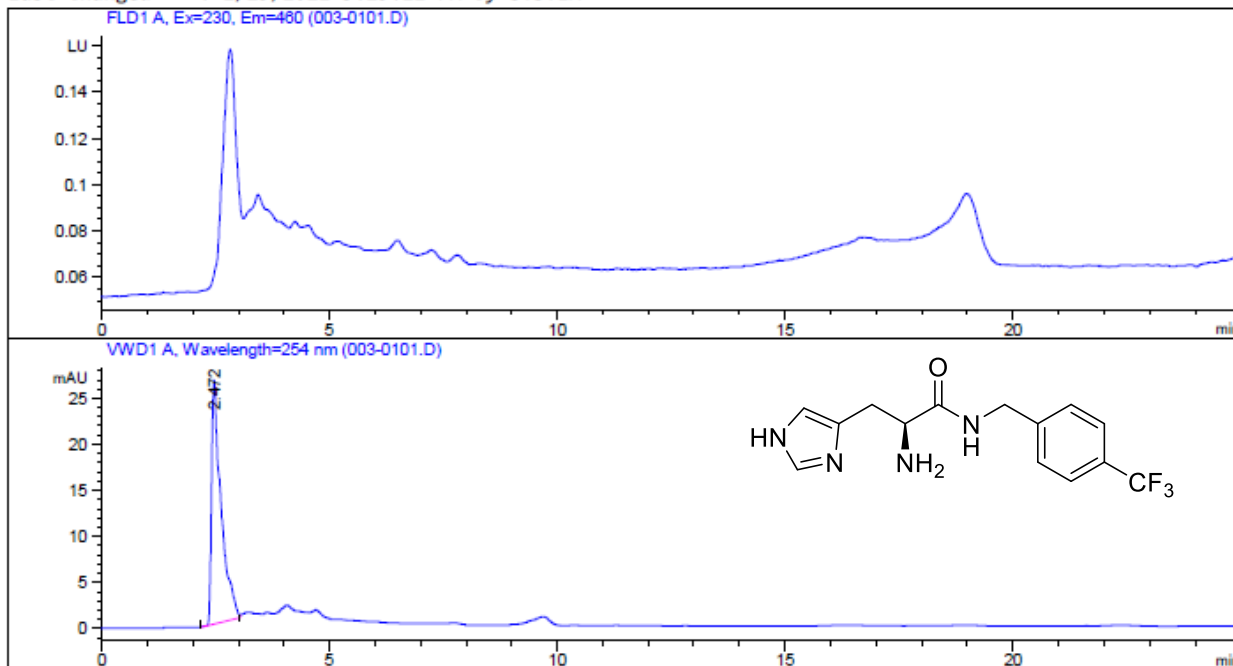

=====  
Area Percent Report  
=====

Sorted By : Signal  
Multiplier : 1.0000  
Dilution : 1.0000  
Do not use Multiplier & Dilution Factor with ISTDs

Signal 1: FLD1 A, Ex=230, Em=460

Signal 2: VWD1 A, Wavelength=254 nm

| Peak # | RetTime [min] | Type | Width [min] | Area [mAU*s] | Height [mAU] | Area %   |
|--------|---------------|------|-------------|--------------|--------------|----------|
| 1      | 2.472         | BV   | 0.1993      | 383.15048    | 26.40471     | 100.0000 |

Totals : 383.15048 26.40471

**(R)-2-amino-3-(1H-imidazol-4-yl)-N-(4-(trifluoromethyl)benzyl)propanamide (5i)**

Sample Name: KS-102

=====

|                                        |                        |
|----------------------------------------|------------------------|
| Acq. Operator : SYSTEM                 | Seq. Line : 1          |
| Acq. Instrument : HPLC                 | Location : Vial 1      |
| Injection Date : 12/9/2020 12:08:59 PM | Inj : 1                |
|                                        | Inj Volume : 20.000 µl |

Sequence File : C:\Chem32\1\DATA\Ao\KK 2020-12-09 12-07-53\KK.S  
Method : C:\CHEM32\1\DATA\AO\KK 2020-12-09 12-07-53\CQ.M (Sequence Method)  
Last changed : 12/9/2020 12:07:53 PM by SYSTEM

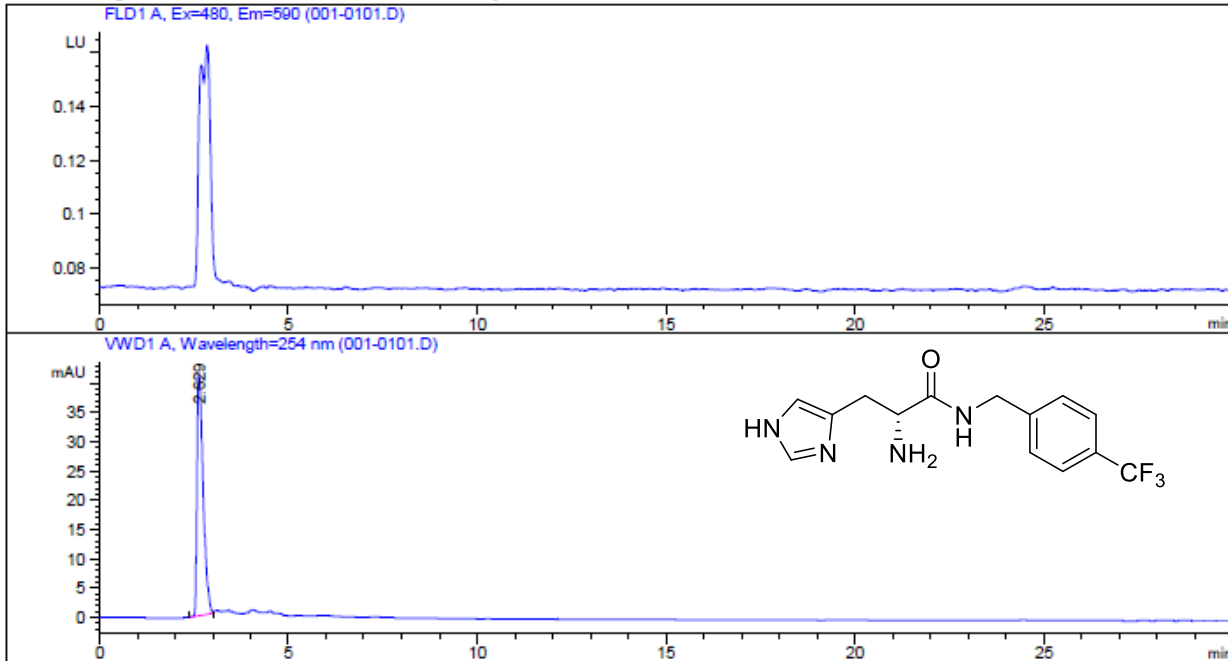

=====  
Area Percent Report  
=====

Sorted By : Signal  
Multiplier : 1.0000  
Dilution : 1.0000  
Use Multiplier & Dilution Factor with ISTDs

Signal 1: FLD1 A, Ex=480, Em=590

Signal 2: VWD1 A, Wavelength=254 nm

| Peak # | RetTime [min] | Type | Width [min] | Area [mAU*s] | Height [mAU] | Area %   |
|--------|---------------|------|-------------|--------------|--------------|----------|
| 1      | 2.629         | BV   | 0.1720      | 464.86584    | 41.10150     | 100.0000 |

Totals :                    464.86584   41.10150

(S)-2-amino-3-(1H-imidazol-4-yl)-N-(2-(trifluoromethyl)benzyl)propanamide (5j)

Sample Name: SR 74-1d

=====

|                 |                         |            |             |
|-----------------|-------------------------|------------|-------------|
| Acq. Operator   | : SYSTEM                | Seq. Line  | : 3         |
| Acq. Instrument | : 1220 HPLC             | Location   | : 44        |
| Injection Date  | : 12/29/2020 3:07:25 PM | Inj        | : 1         |
|                 |                         | Inj Volume | : 50.000 µl |

Different Inj Volume from Sample Entry! Actual Inj Volume : 25.000 µl

Method : C:\Chem32\1\Data\Audifas 2020-12-29 14-08-47\Wash\_Shafikur.M (Sequence Method)

Last changed : 12/29/2020 2:08:51 PM by SYSTEM

Method Info : Wash\_Shafikur Water 0.05 %TFA / Methanol

Sample Info : SR74-1d

Additional Info : Peak(s) manually integrated

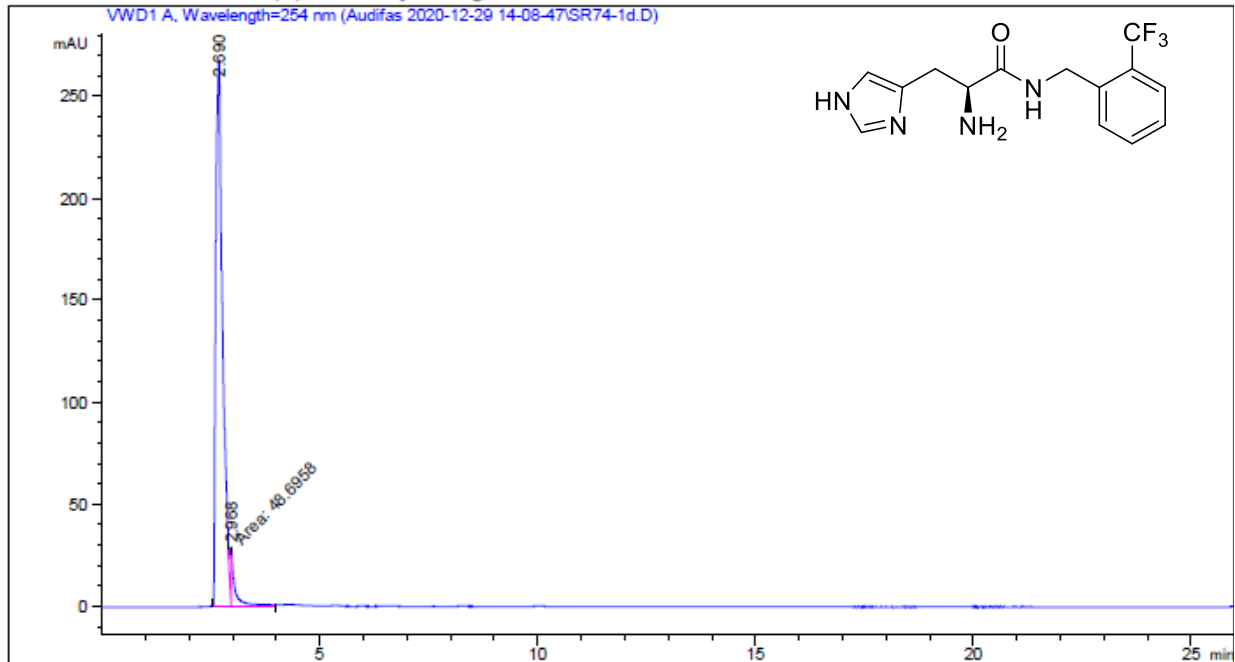

=====  
Area Percent Report  
=====

Sorted By : Signal  
Multiplier : 1.0000  
Dilution : 1.0000  
Use Multiplier & Dilution Factor with ISTDs

Signal 1: WWD1 A, Wavelength=254 nm

| Peak # | RetTime [min] | Type | Width [min] | Area [mAU*s] | Height [mAU] | Area %  |
|--------|---------------|------|-------------|--------------|--------------|---------|
| 1      | 2.690         | MM R | 0.1853      | 3100.65503   | 267.02853    | 98.4538 |
| 2      | 2.968         | MM T | 0.0287      | 48.69577     | 28.29720     | 1.5462  |

Totals : 3149.35080 295.32573

(R)-2-amino-3-(1H-imidazol-4-yl)-N-(2-(trifluoromethyl)benzyl)propanamide

Sample Name: SR 47-1d

=====

|                 |                         |            |             |
|-----------------|-------------------------|------------|-------------|
| Acq. Operator   | : SYSTEM                | Seq. Line  | : 30        |
| Acq. Instrument | : 1220 HPLC             | Location   | : 64        |
| Injection Date  | : 12/30/2020 4:03:14 AM | Inj        | : 1         |
|                 |                         | Inj Volume | : 50.000 µl |

Different Inj Volume from Sample Entry! Actual Inj Volume : 25.000 µl

Method : C:\Chem32\1\Data\Audifas 2020-12-29 14-08-47\Wash\_Shafikur.M (Sequence Method)

Last changed : 12/29/2020 2:08:51 PM by SYSTEM

Method Info : Wash\_Shafikur Water 0.05 %TFA / Methanol

Sample Info : SR-47-1d

Additional Info : Peak(s) manually integrated

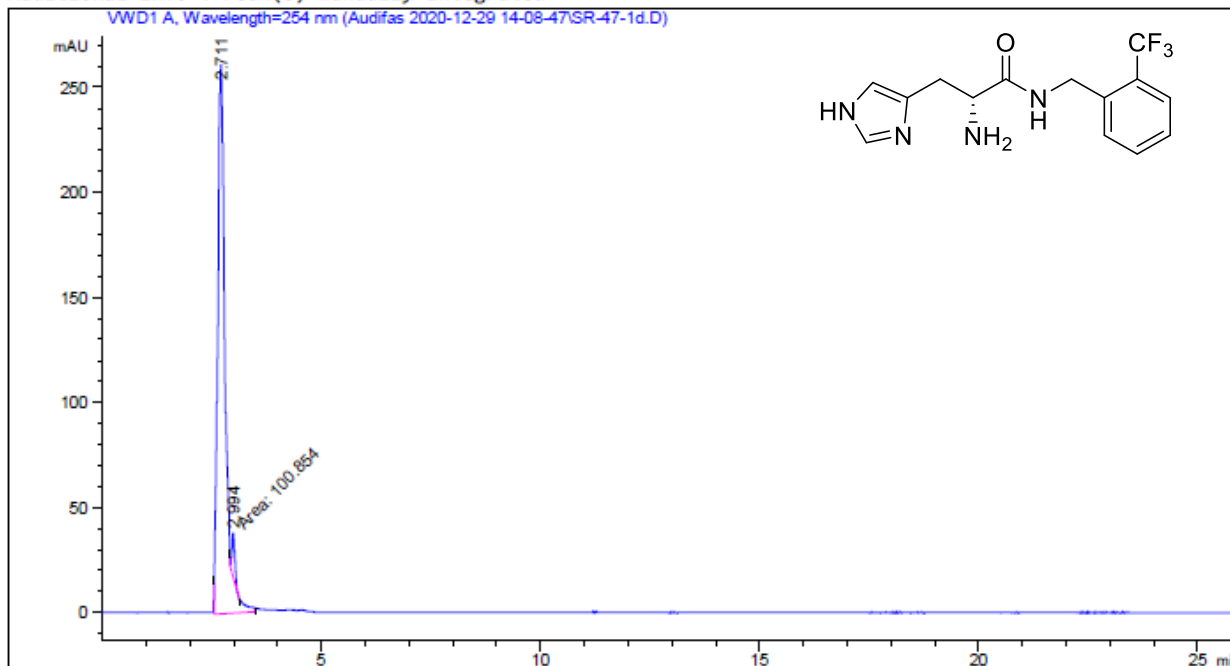

=====  
Area Percent Report  
=====

Sorted By : Signal  
Multiplier : 1.0000  
Dilution : 1.0000  
Use Multiplier & Dilution Factor with ISTDs

Signal 1: WVD1 A, Wavelength=254 nm

| Peak # | RetTime [min] | Type | Width [min] | Area [mAU*s] | Height [mAU] | Area %  |
|--------|---------------|------|-------------|--------------|--------------|---------|
| 1      | 2.711         | MM R | 0.1988      | 3119.55469   | 261.53845    | 96.8683 |
| 2      | 2.994         | MM T | 0.0867      | 100.85400    | 21.43935     | 3.1317  |

Totals : 3220.40869 282.97780

(S)-2-amino-3-(1H-imidazol-4-yl)-N-(3-(trifluoromethyl)benzyl)propanamide (5I)

Sample Name: PS11

=====

|                                                                       |                                                                                  |            |             |
|-----------------------------------------------------------------------|----------------------------------------------------------------------------------|------------|-------------|
| Acq. Operator                                                         | : SYSTEM                                                                         | Seq. Line  | : 33        |
| Acq. Instrument                                                       | : 1220 HPLC                                                                      | Location   | : 83        |
| Injection Date                                                        | : 1/7/2021 9:50:42 AM                                                            | Inj        | : 1         |
|                                                                       |                                                                                  | Inj Volume | : 50.000 µl |
| Different Inj Volume from Sample Entry! Actual Inj Volume : 30.000 µl |                                                                                  |            |             |
| Method                                                                | : C:\Chem32\1\Data\Audifas 2021-01-06 19-03-34\Wash_Shafikur.M (Sequence Method) |            |             |
| Last changed                                                          | : 1/6/2021 7:13:21 PM by SYSTEM                                                  |            |             |
| Method Info                                                           | : Methanol/Water TFA 0.05 %                                                      |            |             |

Sample Info : PS11

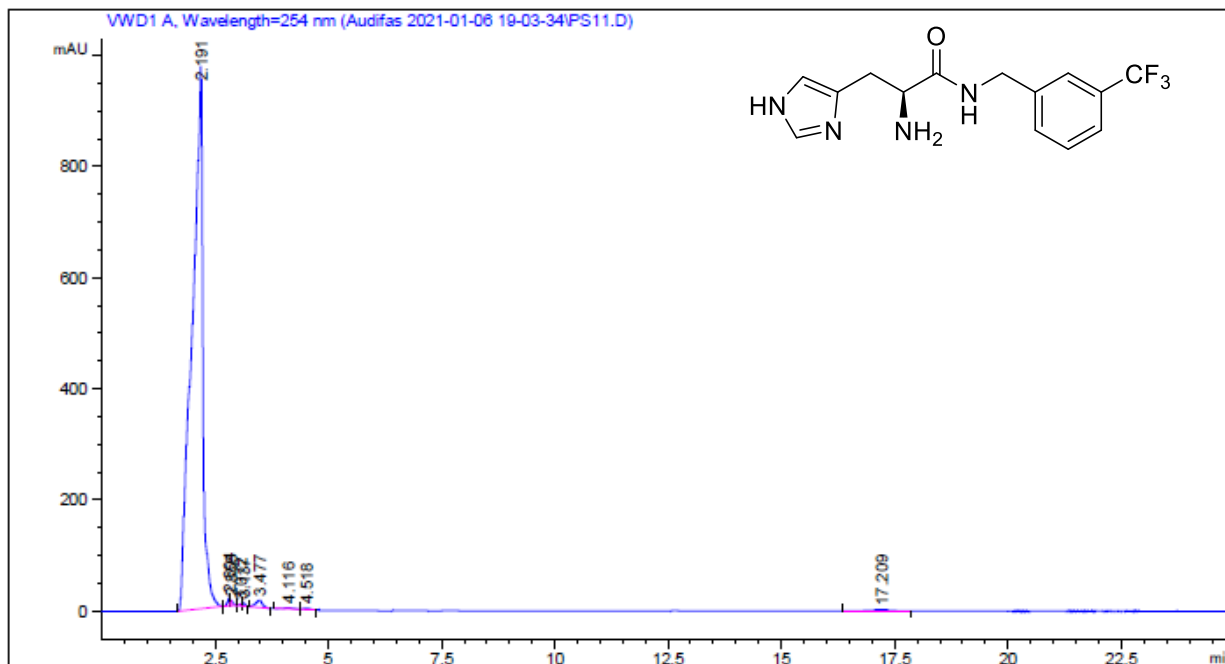

=====  
Area Percent Report  
=====

Sorted By : Signal  
Multiplier : 1.0000  
Dilution : 1.0000  
Use Multiplier & Dilution Factor with ISTDs

Signal 1: WVD1 A, Wavelength=254 nm

| Peak # | RetTime [min] | Type | Width [min] | Area [mAU*s] | Height [mAU] | Area %  |
|--------|---------------|------|-------------|--------------|--------------|---------|
| 1      | 2.191         | BV   | 0.2070      | 1.60680e4    | 976.16382    | 97.6645 |
| 2      | 2.804         | VV   | 0.0523      | 50.54400     | 13.62504     | 0.3072  |
| 3      | 2.856         | VB   | 0.0494      | 31.15095     | 9.23310      | 0.1893  |
| 4      | 3.072         | BV   | 0.0430      | 7.76413      | 2.20815      | 0.0472  |
| 5      | 3.137         | VB   | 0.0726      | 22.62145     | 4.70742      | 0.1375  |

(R)-2-amino-3-(1H-imidazol-4-yl)-N-(3-(trifluoromethyl)benzyl)propanamide (5m)

Sample Name: KS-50

=====

|                                                                                         |                        |
|-----------------------------------------------------------------------------------------|------------------------|
| Acq. Operator : SYSTEM                                                                  | Seq. Line : 24         |
| Acq. Instrument : 1220 HPLC                                                             | Location : 76          |
| Injection Date : 1/7/2021 5:42:46 AM                                                    | Inj : 1                |
|                                                                                         | Inj Volume : 50.000 µl |
| Different Inj Volume from Sample Entry! Actual Inj Volume : 30.000 µl                   |                        |
| Method : C:\Chem32\1\Data\Audifas 2021-01-06 19-03-34\Wash_Shafikur.M (Sequence Method) |                        |
| Last changed : 1/6/2021 7:13:21 PM by SYSTEM                                            |                        |
| Method Info : Methanol/Water TFA 0.05 %                                                 |                        |

Sample Info : KS-50

Additional Info : Peak(s) manually integrated

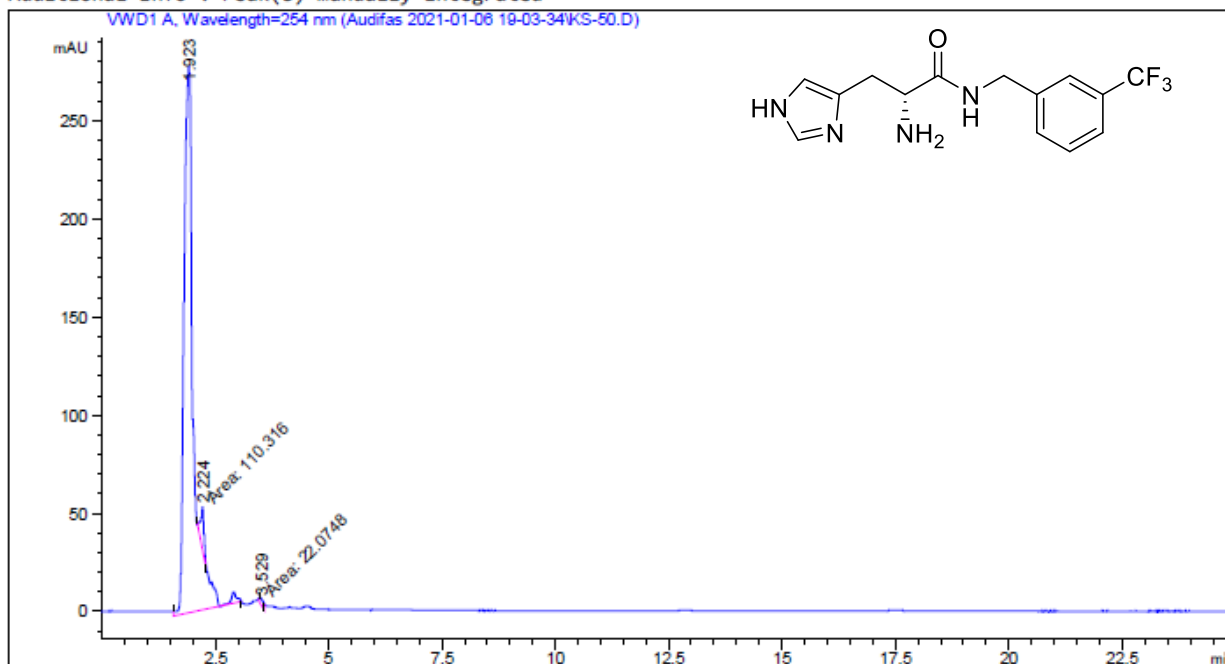

=====  
Area Percent Report  
=====

Sorted By : Signal  
Multiplier : 1.0000  
Dilution : 1.0000  
Use Multiplier & Dilution Factor with ISTDs

Signal 1: VWD1 A, Wavelength=254 nm

| Peak # | RetTime [min] | Type | Width [min] | Area [mAU*s] | Height [mAU] | Area %  |
|--------|---------------|------|-------------|--------------|--------------|---------|
| 1      | 1.923         | MM R | 0.2843      | 4027.58911   | 278.71985    | 96.8175 |
| 2      | 2.224         | MM T | 0.1064      | 110.31607    | 22.17361     | 2.6518  |
| 3      | 3.529         | MM T | 0.0739      | 22.07477     | 3.53974      | 0.5306  |



(R)-2-amino-N-(4-fluorobenzyl)-3-(1H-imidazol-4-yl)propanamide (5o)

Sample Name: KS 93d

=====

|                 |                       |            |             |
|-----------------|-----------------------|------------|-------------|
| Acq. Operator   | : SYSTEM              | Seq. Line  | : 4         |
| Acq. Instrument | : 1220 HPLC           | Location   | : 53        |
| Injection Date  | : 2/3/2021 4:36:50 PM | Inj        | : 1         |
|                 |                       | Inj Volume | : 50.000 µl |

Different Inj Volume from Sample Entry! Actual Inj Volume : 30.000 µl

|              |                                                                                  |
|--------------|----------------------------------------------------------------------------------|
| Method       | : C:\Chem32\1\Data\Audifas 2021-02-03 15-12-48\Wash_Shafikur.M (Sequence Method) |
| Last changed | : 2/3/2021 3:12:52 PM by SYSTEM                                                  |
| Method Info  | : Methanol/Water 0.05 % TFA                                                      |

Sample Info : KS93d

Additional Info : Peak(s) manually integrated

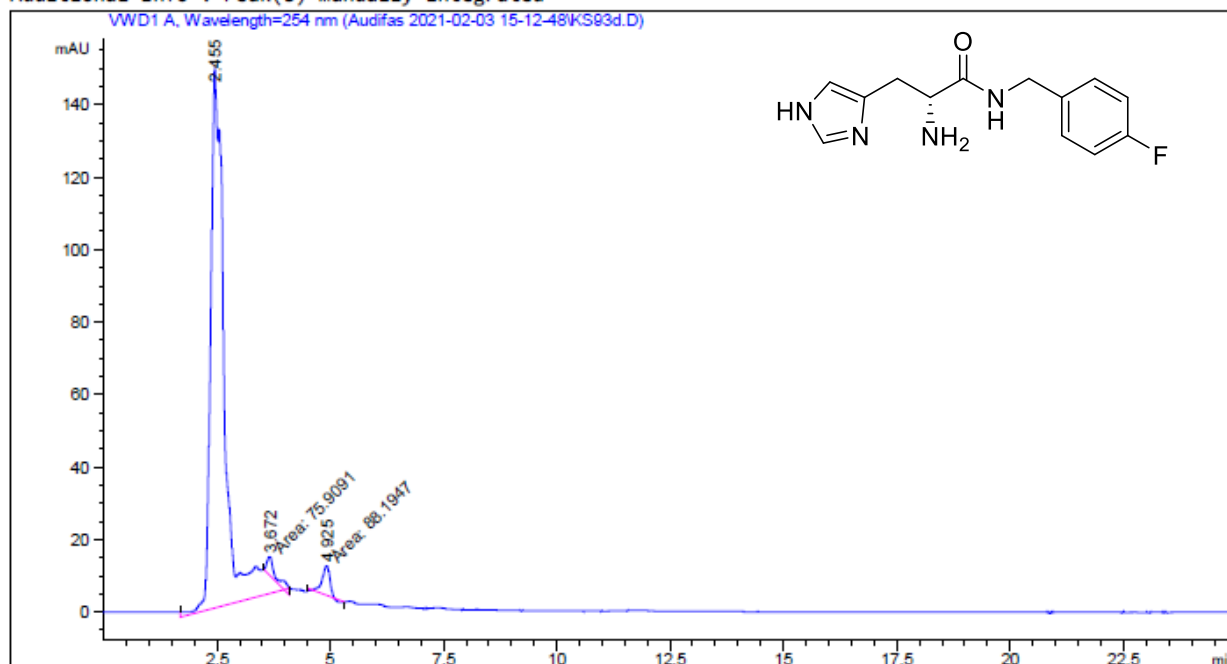

=====  
Area Percent Report  
=====

Sorted By : Signal  
Multiplier : 1.0000  
Dilution : 1.0000  
Use Multiplier & Dilution Factor with ISTDs

Signal 1: WWD1 A, Wavelength=254 nm

| Peak # | RetTime [min] | Type | Width [min] | Area [mAU*s] | Height [mAU] | Area %  |
|--------|---------------|------|-------------|--------------|--------------|---------|
| 1      | 2.455         | MM R | 0.3552      | 3183.49414   | 149.36600    | 95.0979 |
| 2      | 3.672         | MM T | 0.2428      | 75.90913     | 5.21036      | 2.2676  |
| 3      | 4.925         | MM T | 0.1811      | 88.19469     | 8.11711      | 2.6346  |



(S)-2-amino-3-(1H-imidazol-4-yl)-N-(4-(trifluoromethoxy)benzyl)propanamide (5p)

Sample Name: PSK 5d

=====

|                                                                            |                        |
|----------------------------------------------------------------------------|------------------------|
| Acq. Operator : SYSTEM                                                     | Seq. Line : 1          |
| Acq. Instrument : HPLC                                                     | Location : Vial 2      |
| Injection Date : 2/22/2021 1:15:35 PM                                      | Inj : 1                |
|                                                                            | Inj Volume : 20.000 µl |
| Sequence File : C:\Chem32\1\DATA\Ao\KK 2021-02-22 13-14-27\KK.S            |                        |
| Method : C:\CHEM32\1\DATA\AO\KK 2021-02-22 13-14-27\CQ.M (Sequence Method) |                        |
| Last changed : 2/22/2021 1:14:27 PM by SYSTEM                              |                        |

=====

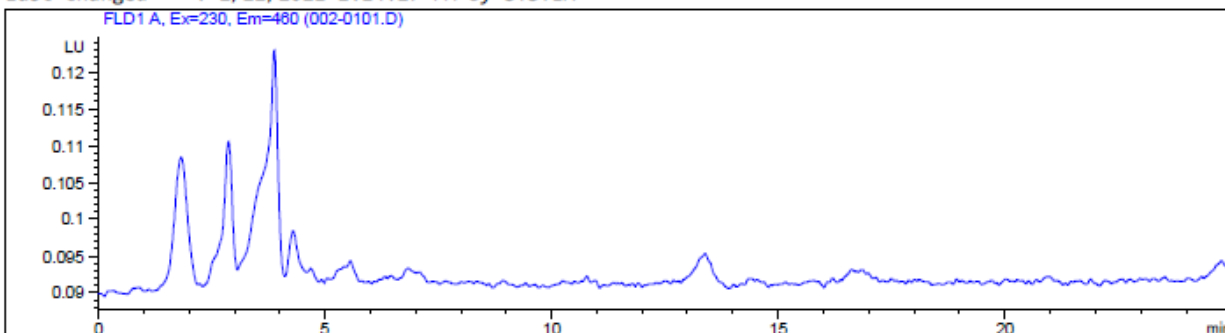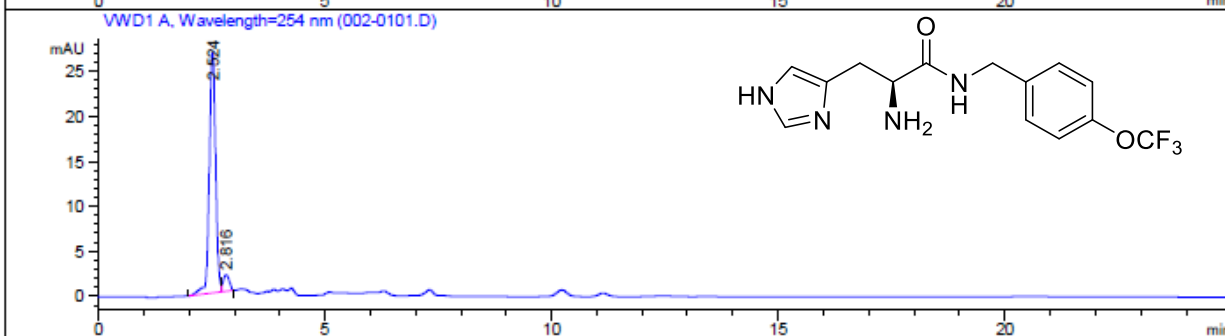

=====  
Area Percent Report  
=====

Sorted By : Signal  
Multiplier : 1.0000  
Dilution : 1.0000  
Do not use Multiplier & Dilution Factor with ISTDs

Signal 1: FLD1 A, Ex=230, Em=460

Signal 2: VWD1 A, Wavelength=254 nm

| Peak # | RetTime [min] | Type | Width [min] | Area [mAU*s] | Height [mAU] | Area %  |
|--------|---------------|------|-------------|--------------|--------------|---------|
| 1      | 2.524         | BV   | 0.1479      | 261.86145    | 26.82778     | 93.8184 |
| 2      | 2.816         | VB   | 0.1470      | 17.25385     | 1.84755      | 6.1816  |

Totals :                           279.11530   28.67532

**(R)-2-amino-3-(1H-imidazol-4-yl)-N-(4-(trifluoromethoxy)benzyl)propanamide (5q)**

Sample Name: KS-99

=====

|                                                                            |                        |
|----------------------------------------------------------------------------|------------------------|
| Acq. Operator : SYSTEM                                                     | Seq. Line : 1          |
| Acq. Instrument : HPLC                                                     | Location : Vial 1      |
| Injection Date : 12/9/2020 2:37:16 PM                                      | Inj : 1                |
|                                                                            | Inj Volume : 20.000 µl |
| Method : C:\CHEM32\1\DATA\AO\KK 2020-12-09 14-36-07\CQ.M (Sequence Method) |                        |
| Last changed : 12/9/2020 2:36:08 PM by SYSTEM                              |                        |

=====

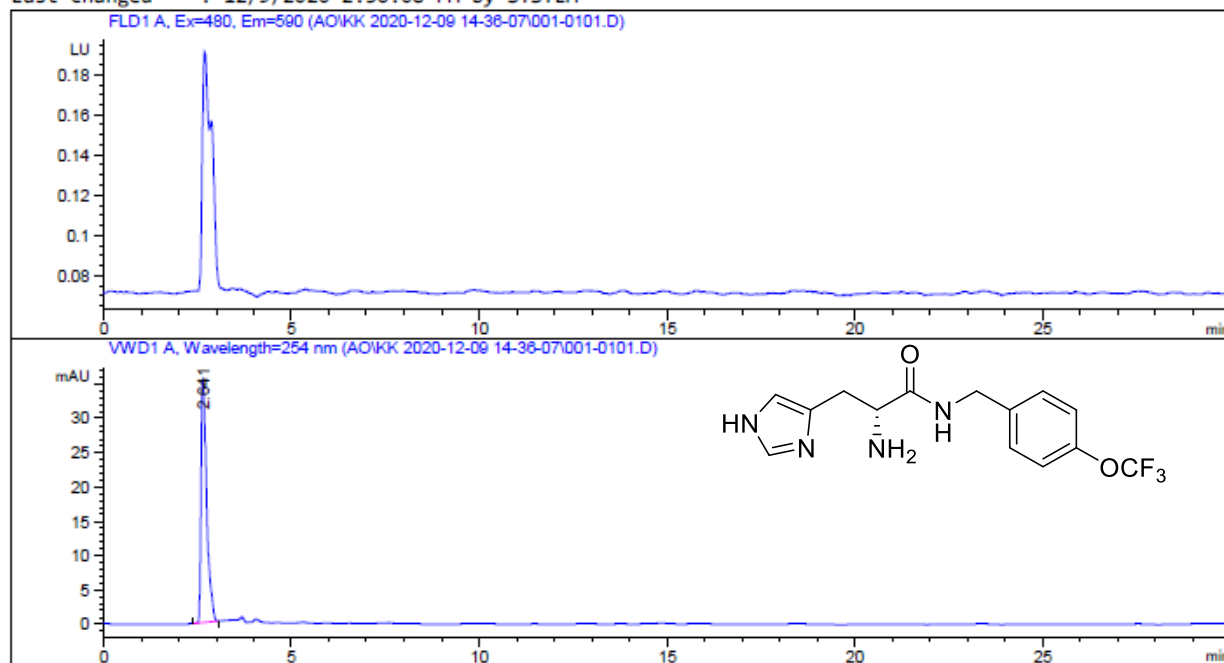

=====  
Area Percent Report  
=====

Sorted By : Signal  
Multiplier : 1.0000  
Dilution : 1.0000  
Use Multiplier & Dilution Factor with ISTDs

Signal 1: FLD1 A, Ex=480, Em=590

Signal 2: WVD1 A, Wavelength=254 nm

| Peak # | RetTime [min] | Type | Width [min] | Area [mAU*s] | Height [mAU] | Area %   |
|--------|---------------|------|-------------|--------------|--------------|----------|
| 1      | 2.641         | BB   | 0.1623      | 368.46179    | 35.42866     | 100.0000 |

Totals : 368.46179 35.42866

(S)-2-amino-3-(1H-imidazol-4-yl)-N-(4-((trifluoromethyl)thio)benzyl)propanamide

Sample Name: SR-25-2d

=====

|                                                                       |                                                                                  |            |             |
|-----------------------------------------------------------------------|----------------------------------------------------------------------------------|------------|-------------|
| Acq. Operator                                                         | : SYSTEM                                                                         | Seq. Line  | : 6         |
| Acq. Instrument                                                       | : 1220 HPLC                                                                      | Location   | : 56        |
| Injection Date                                                        | : 12/30/2020 5:50:10 PM                                                          | Inj        | : 1         |
|                                                                       |                                                                                  | Inj Volume | : 50.000 µl |
| Different Inj Volume from Sample Entry! Actual Inj Volume : 25.000 µl |                                                                                  |            |             |
| Sequence File                                                         | : C:\Chem32\1\Data\Audifas 2020-12-30 15-31-06\Audifas.S                         |            |             |
| Method                                                                | : C:\Chem32\1\Data\Audifas 2020-12-30 15-31-06\Wash_Shafikur.M (Sequence Method) |            |             |
| Last changed                                                          | : 12/30/2020 3:31:09 PM by SYSTEM                                                |            |             |
| Method Info                                                           | : Wash_Shafikur Water 0.05% TFA / Methanol                                       |            |             |

Sample Info : SR-25-2d

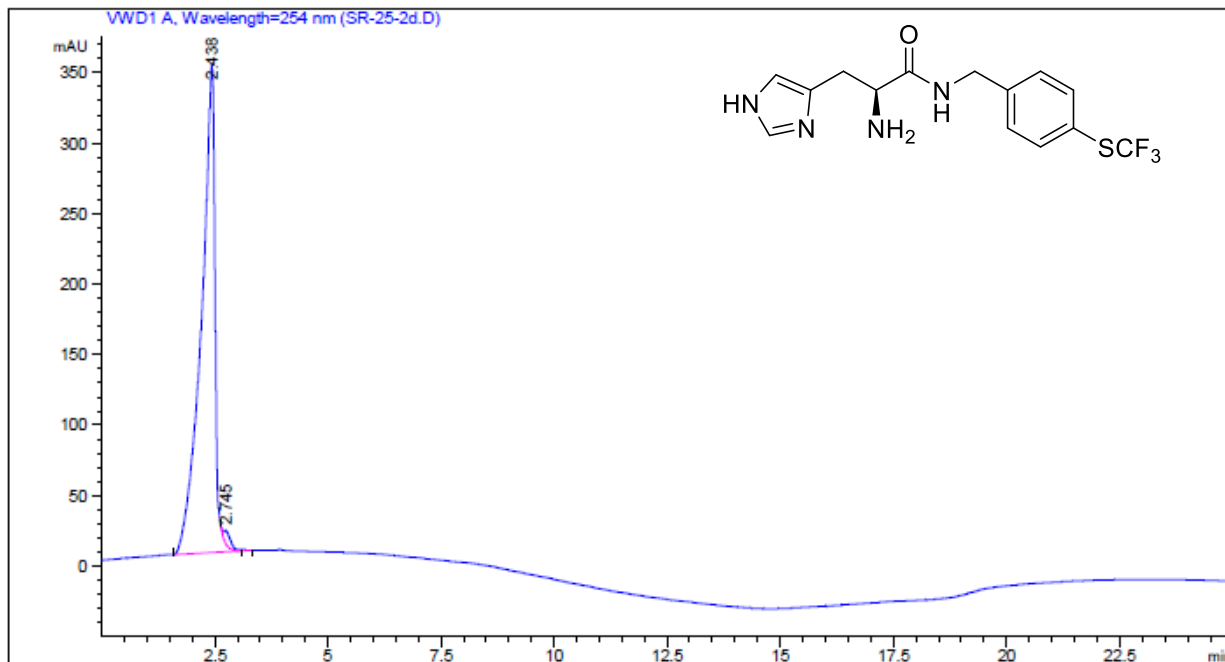

=====  
Area Percent Report  
=====

Sorted By : Signal  
Multiplier : 1.0000  
Dilution : 1.0000  
Use Multiplier & Dilution Factor with ISTDs

Signal 1: WWD1 A, Wavelength=254 nm

| Peak # | RetTime [min] | Type | Width [min] | Area [mAU*s] | Height [mAU] | Area %  |
|--------|---------------|------|-------------|--------------|--------------|---------|
| 1      | 2.438         | BV R | 0.2771      | 7274.41016   | 346.24774    | 98.5591 |
| 2      | 2.745         | VV E | 0.1413      | 106.35146    | 9.52277      | 1.4409  |

Totals : 7380.76161 355.77051

(R)-2-amino-3-(1H-imidazol-4-yl)-N-(4-((trifluoromethyl)thio)benzyl)propanamide

Sample Name: SR-26-2d

=====

|                 |                        |            |             |
|-----------------|------------------------|------------|-------------|
| Acq. Operator   | : SYSTEM               | Seq. Line  | : 11        |
| Acq. Instrument | : 1220 HPLC            | Location   | : 67        |
| Injection Date  | : 1/6/2021 11:44:37 PM | Inj        | : 1         |
|                 |                        | Inj Volume | : 50.000 µl |

Different Inj Volume from Sample Entry! Actual Inj Volume : 30.000 µl

Method : C:\Chem32\1\Data\Audifas 2021-01-06 19-03-34\Wash\_Shafikur.M (Sequence Method)

Last changed : 1/6/2021 7:13:21 PM by SYSTEM

Method Info : Methanol/Water TFA 0.05 %

Sample Info : SR-26-2d

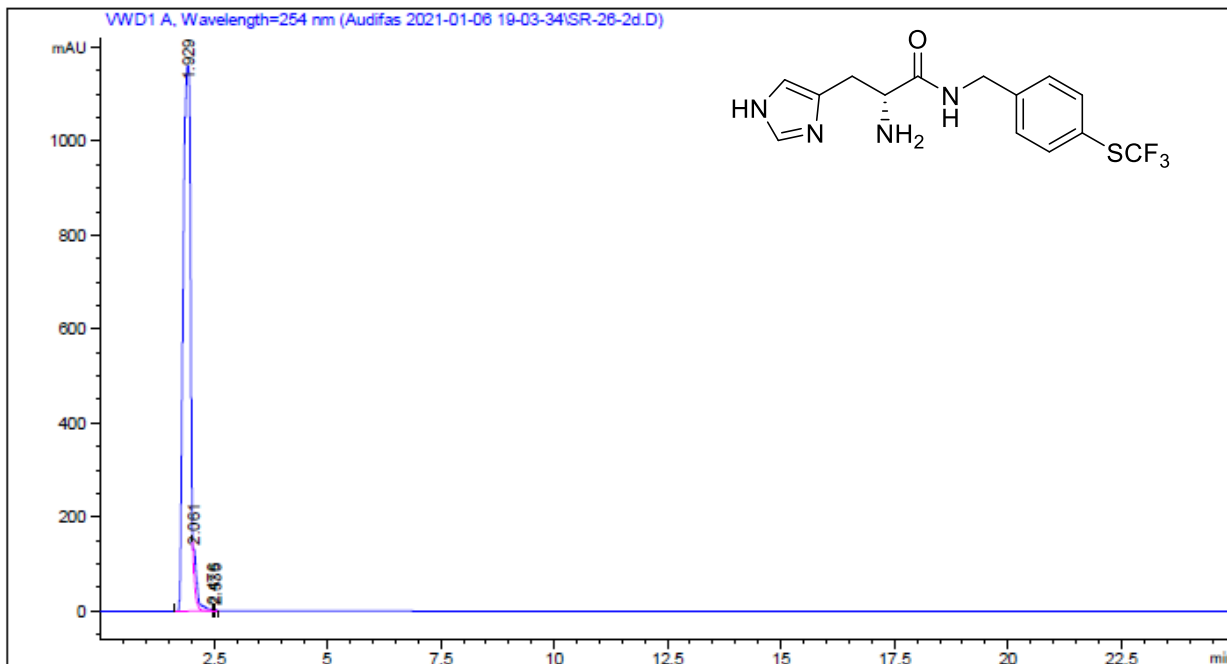

Area Percent Report

Sorted By : Signal  
Multiplier : 1.0000  
Dilution : 1.0000  
Use Multiplier & Dilution Factor with ISTDs

Signal 1: WWD1 A, Wavelength=254 nm

| Peak # | RetTime [min] | Type | Width [min] | Area [mAU*s] | Height [mAU] | Area %  |
|--------|---------------|------|-------------|--------------|--------------|---------|
| 1      | 1.929         | BV R | 0.1848      | 1.33215e4    | 1161.39929   | 96.5065 |
| 2      | 2.061         | VV E | 0.1207      | 467.32349    | 50.17341     | 3.3855  |
| 3      | 2.476         | WV E | 0.0413      | 8.78115      | 2.94324      | 0.0636  |
| 4      | 2.535         | VB E | 0.0416      | 6.12294      | 2.15543      | 0.0444  |

(S)-2-amino-3-(1H-imidazol-4-yl)-N-phenylpropanamide (6a)

Sample Name: SR 73-1 d

=====

|                                        |                        |
|----------------------------------------|------------------------|
| Acq. Operator : SYSTEM                 | Seq. Line : 1          |
| Acq. Instrument : HPLC                 | Location : Vial 1      |
| Injection Date : 12/16/2020 4:40:42 PM | Inj : 1                |
|                                        | Inj Volume : 20.000 µl |

Sequence File : C:\Chem32\1\DATA\Ao\KK 2020-12-16 16-39-32\KK.S  
Method : C:\CHEM32\1\DATA\AO\KK 2020-12-16 16-39-32\CQ.M (Sequence Method)  
Last changed : 12/16/2020 4:39:33 PM by SYSTEM

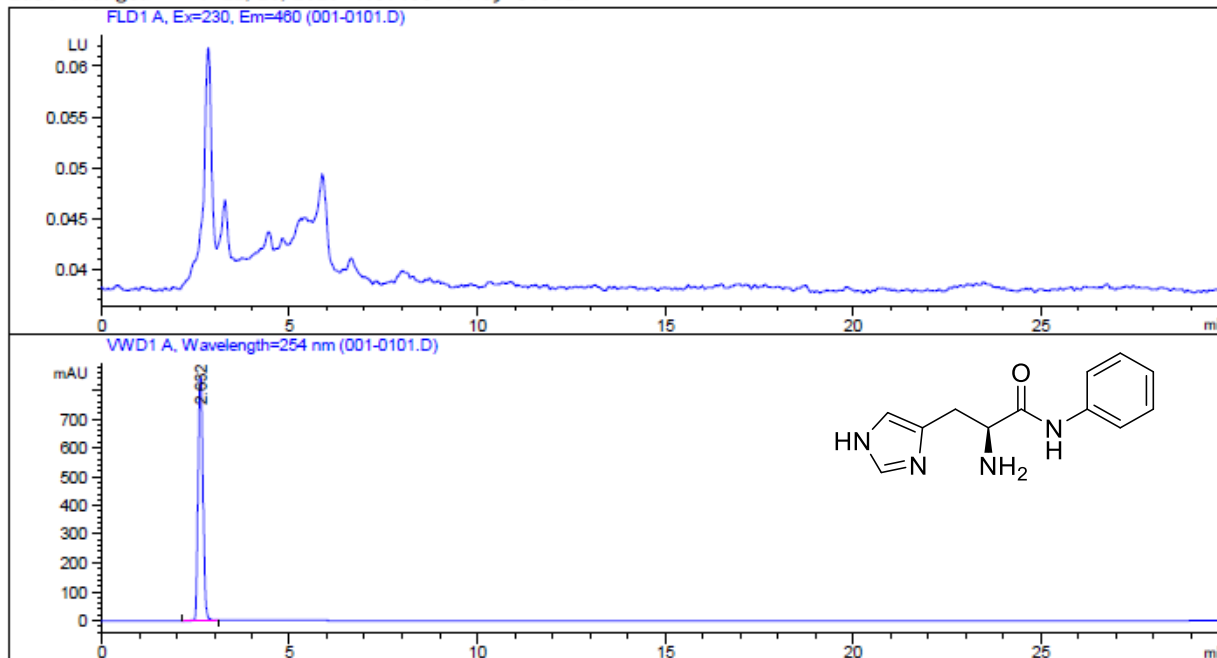

=====  
Area Percent Report  
=====

Sorted By : Signal  
Multiplier : 1.0000  
Dilution : 1.0000  
Do not use Multiplier & Dilution Factor with ISTDs

Signal 1: FLD1 A, Ex=230, Em=460

Signal 2: VWD1 A, Wavelength=254 nm

| Peak # | RetTime [min] | Type | Width [min] | Area [mAU*s] | Height [mAU] | Area %   |
|--------|---------------|------|-------------|--------------|--------------|----------|
| 1      | 2.632         | BB   | 0.1416      | 7673.69678   | 848.12286    | 100.0000 |

Totals : 7673.69678 848.12286

**(R)-2-amino-3-(1H-imidazol-4-yl)-N-phenylpropanamide (6b)**

Sample Name: SR 72-1 d

=====

|                                                                            |                        |
|----------------------------------------------------------------------------|------------------------|
| Acq. Operator : SYSTEM                                                     | Seq. Line : 1          |
| Acq. Instrument : HPLC                                                     | Location : Vial 1      |
| Injection Date : 12/16/2020 1:53:19 PM                                     | Inj : 1                |
|                                                                            | Inj Volume : 20.000 µl |
| Sequence File : C:\Chem32\1\DATA\AO\KK 2020-12-16 13-52-11\KK.S            |                        |
| Method : C:\CHEM32\1\DATA\AO\KK 2020-12-16 13-52-11\CQ.M (Sequence Method) |                        |
| Last changed : 12/16/2020 1:52:12 PM by SYSTEM                             |                        |

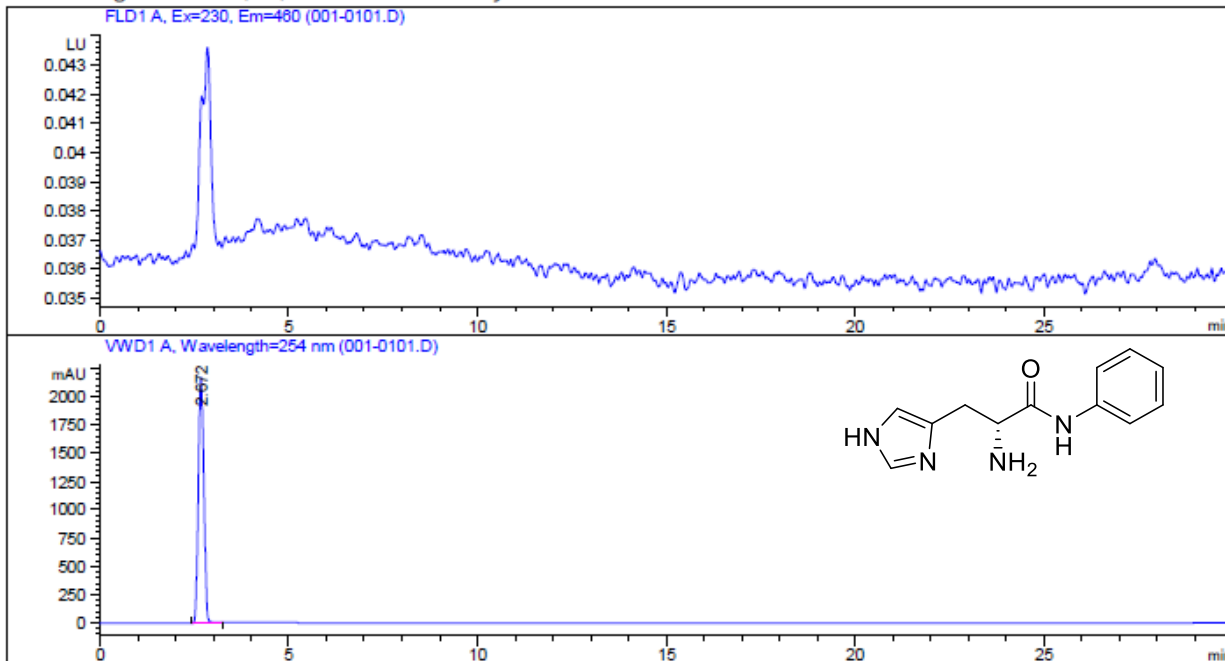

=====  
Area Percent Report  
=====

Sorted By : Signal  
Multiplier : 1.0000  
Dilution : 1.0000  
Do not use Multiplier & Dilution Factor with ISTDs

Signal 1: FLD1 A, Ex=230, Em=460

Signal 2: VWD1 A, Wavelength=254 nm

| Peak # | RetTime [min] | Type | Width [min] | Area [mAU*s] | Height [mAU] | Area %   |
|--------|---------------|------|-------------|--------------|--------------|----------|
| 1      | 2.672         | BB   | 0.1621      | 2.19906e4    | 2173.03809   | 100.0000 |

Totals : 2.19906e4 2173.03809

# (S)-2-amino-3-(1H-imidazol-4-yl)-N-(3-phenylpropyl)propanamide (7a)

Sample Name: SR-27-1d

=====

|                 |                       |            |             |
|-----------------|-----------------------|------------|-------------|
| Acq. Operator   | : SYSTEM              | Seq. Line  | : 18        |
| Acq. Instrument | : 1220 HPLC           | Location   | : 72        |
| Injection Date  | : 1/7/2021 2:57:24 AM | Inj        | : 1         |
|                 |                       | Inj Volume | : 50.000 µl |

Different Inj Volume from Sample Entry! Actual Inj Volume : 30.000 µl

Method : C:\Chem32\1\Data\Audifas 2021-01-06 19-03-34\Wash\_Shafikur.M (Sequence Method)

Last changed : 1/6/2021 7:13:21 PM by SYSTEM

Method Info : Methanol/Water TFA 0.05 %

Sample Info : SR-27-1d

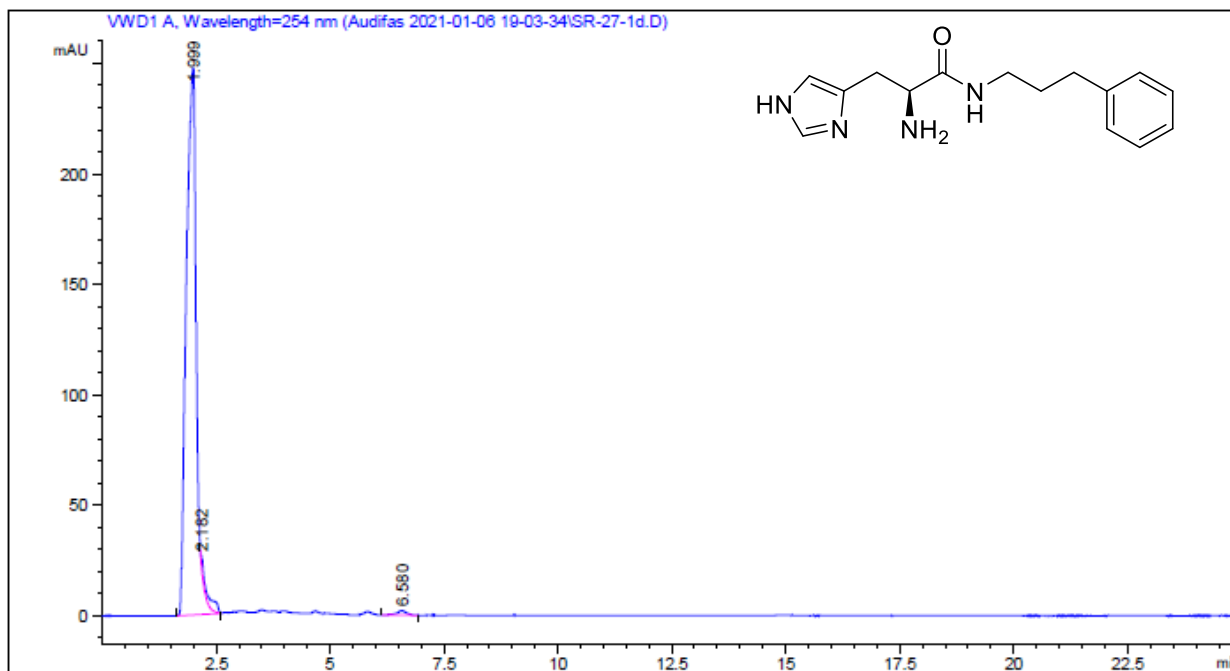

## Area Percent Report

Sorted By : Signal  
Multiplier : 1.0000  
Dilution : 1.0000  
Use Multiplier & Dilution Factor with ISTDs

Signal 1: VWD1 A, Wavelength=254 nm

| Peak # | RetTime [min] | Type | Width [min] | Area [mAU*s] | Height [mAU] | Area %  |
|--------|---------------|------|-------------|--------------|--------------|---------|
| 1      | 1.999         | BV R | 0.2161      | 3774.33862   | 247.89630    | 96.7906 |
| 2      | 2.182         | VB E | 0.2153      | 96.46211     | 5.44194      | 2.4737  |
| 3      | 6.580         | VB   | 0.1799      | 28.68609     | 1.88636      | 0.7356  |

Totals : 3899.48682 255.22460







(R)-2-amino-3-(1H-imidazol-4-yl)-N-(4-phenylbutyl)propanamide (8b)

Sample Name: SR34-1d

=====

|                                                                       |                                                                                  |            |             |
|-----------------------------------------------------------------------|----------------------------------------------------------------------------------|------------|-------------|
| Acq. Operator                                                         | : SYSTEM                                                                         | Seq. Line  | : 1         |
| Acq. Instrument                                                       | : 1220 HPLC                                                                      | Location   | : 51        |
| Injection Date                                                        | : 1/30/2021 2:24:48 PM                                                           | Inj        | : 1         |
|                                                                       |                                                                                  | Inj Volume | : 50.000 µl |
| Different Inj Volume from Sample Entry! Actual Inj Volume : 30.000 µl |                                                                                  |            |             |
| Method                                                                | : C:\Chem32\1\Data\Audifas 2021-01-30 14-23-00\Wash_Shafikur.M (Sequence Method) |            |             |
| Last changed                                                          | : 1/30/2021 2:23:03 PM by SYSTEM                                                 |            |             |
| Method Info                                                           | : Methanol/Water 0.05 % TFA                                                      |            |             |

Sample Info : SR34-1d

Additional Info : Peak(s) manually integrated

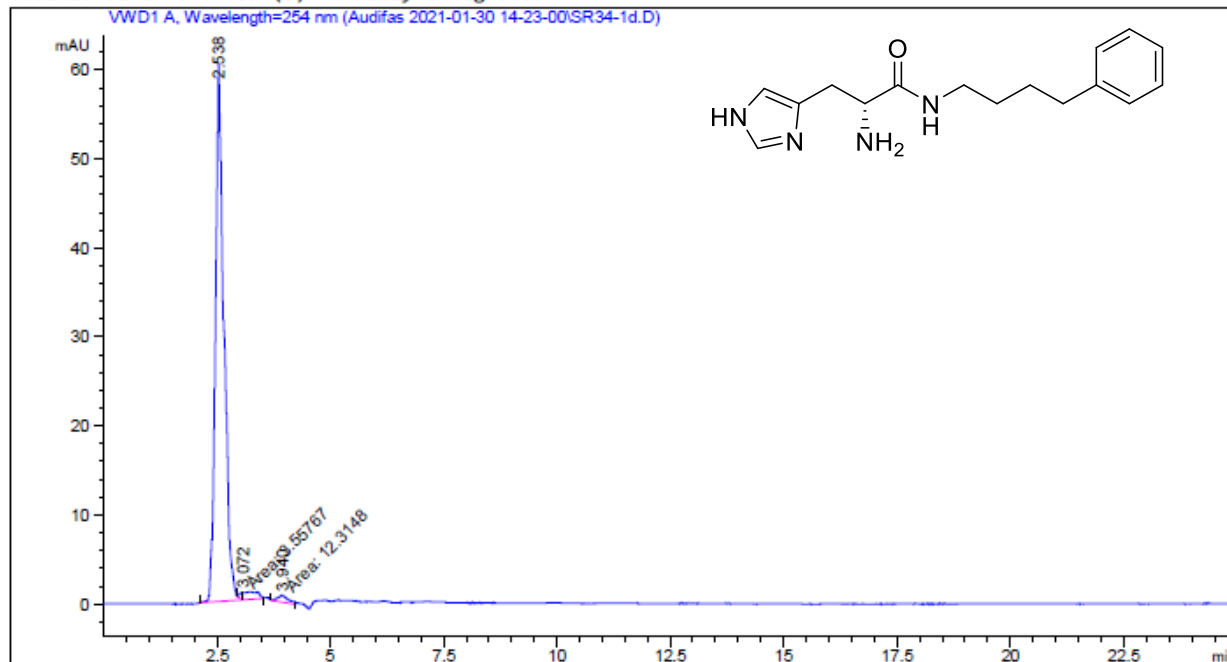

=====  
Area Percent Report  
=====

Sorted By : Signal  
Multiplier : 1.0000  
Dilution : 1.0000  
Use Multiplier & Dilution Factor with ISTDs

Signal 1: VWD1 A, Wavelength=254 nm

| Peak # | RetTime [min] | Type | Width [min] | Area [mAU*s] | Height [mAU] | Area %  |
|--------|---------------|------|-------------|--------------|--------------|---------|
| 1      | 2.538         | MM R | 0.2788      | 802.77618    | 60.50960     | 98.0611 |
| 2      | 3.072         | MM T | 0.0814      | 3.55767      | 7.28136e-1   | 0.4346  |
| 3      | 3.940         | MM T | 0.2576      | 12.31482     | 7.74216e-1   | 1.5043  |



(R)-N-(2-(1H-indol-3-yl)ethyl)-2-amino-3-(1H-imidazol-4-yl)propanamide (9e)

Sample Name: SR8-2d

=====

|                 |                        |            |             |
|-----------------|------------------------|------------|-------------|
| Acq. Operator   | : SYSTEM               | Seq. Line  | : 4         |
| Acq. Instrument | : 1220 HPLC            | Location   | : 54        |
| Injection Date  | : 1/30/2021 3:47:27 PM | Inj        | : 1         |
|                 |                        | Inj Volume | : 50.000 µl |

Different Inj Volume from Sample Entry! Actual Inj Volume : 30.000 µl

Method : C:\Chem32\1\Data\Audifas 2021-01-30 14-23-00\Wash\_Shafikur.M (Sequence Method)

Last changed : 1/30/2021 2:23:03 PM by SYSTEM

Method Info : Methanol/Water 0.05 % TFA

Sample Info : SR8-2d

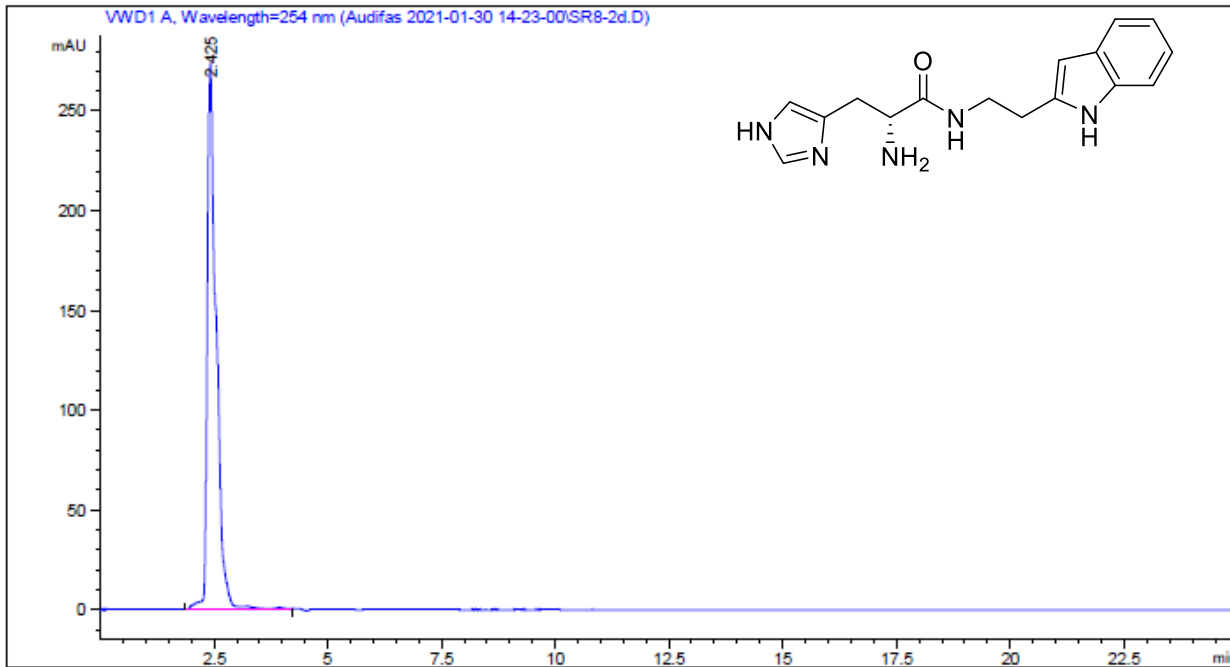

=====  
Area Percent Report  
=====

Sorted By : Signal  
Multiplier : 1.0000  
Dilution : 1.0000  
Use Multiplier & Dilution Factor with ISTDs

Signal 1: VWD1 A, Wavelength=254 nm

| Peak # | RetTime [min] | Type | Width [min] | Area [mAU*s] | Height [mAU] | Area %   |
|--------|---------------|------|-------------|--------------|--------------|----------|
| 1      | 2.425         | BV R | 0.1908      | 3754.30176   | 274.04691    | 100.0000 |

Totals : 3754.30176 274.04691

(S)-2-amino-3-(1H-imidazol-4-yl)-N-(2-(naphthalen-2-yl)ethyl)propanamide (9f)

Sample Name: SR-18-2d

=====

|                                      |                        |
|--------------------------------------|------------------------|
| Acq. Operator : SYSTEM               | Seq. Line : 6          |
| Acq. Instrument : 1220 HPLC          | Location : 64          |
| Injection Date : 1/6/2021 9:26:47 PM | Inj : 1                |
|                                      | Inj Volume : 50.000 µl |

Different Inj Volume from Sample Entry! Actual Inj Volume : 30.000 µl

Method : C:\Chem32\1\Data\Audifas 2021-01-06 19-03-34\Wash\_Shafikur.M (Sequence Method)

Last changed : 1/6/2021 7:13:21 PM by SYSTEM

Method Info : Methanol/Water TFA 0.05 %

Sample Info : SR-18-2d

Additional Info : Peak(s) manually integrated

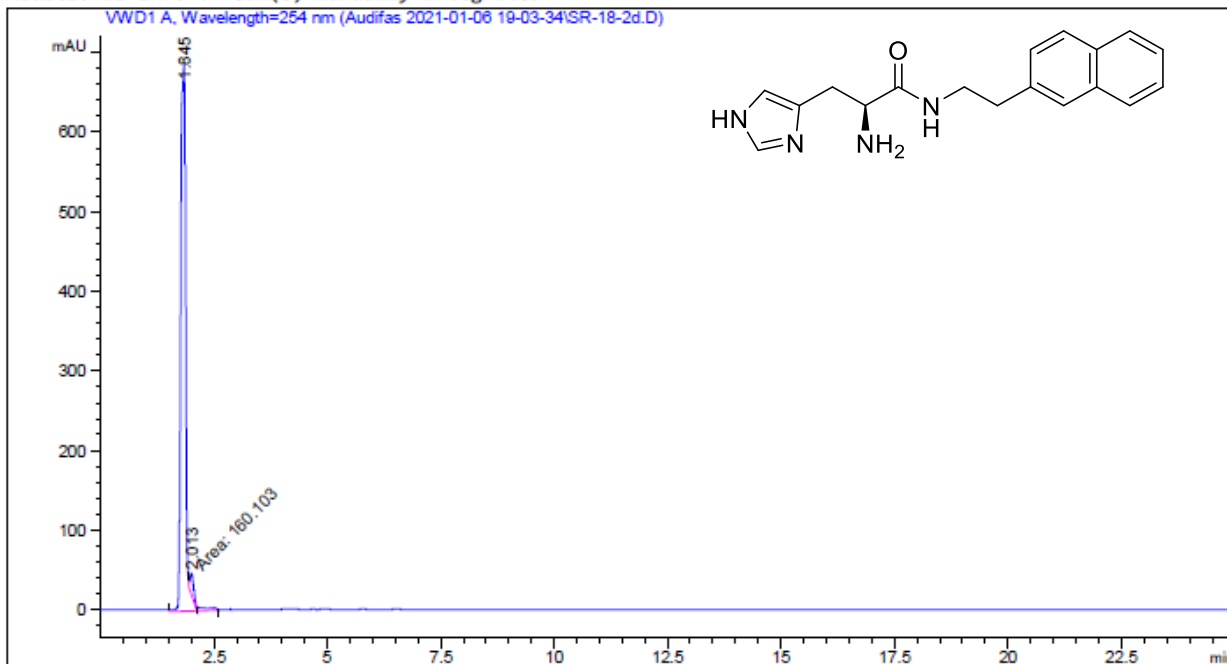

=====  
Area Percent Report  
=====

Sorted By : Signal  
Multiplier : 1.0000  
Dilution : 1.0000  
Use Multiplier & Dilution Factor with ISTDs

Signal 1: VWD1 A, Wavelength=254 nm

| Peak # | RetTime [min] | Type | Width [min] | Area [mAU*s] | Height [mAU] | Area %  |
|--------|---------------|------|-------------|--------------|--------------|---------|
| 1      | 1.845         | MM R | 0.1948      | 5318.42285   | 687.43878    | 97.0776 |
| 2      | 2.013         | MM T | 0.1050      | 160.10272    | 26.58394     | 2.9224  |

Totals : 5478.52557 714.02272

**(R)-2-amino-3-(1H-imidazol-4-yl)-N-(2-(naphthalen-2-yl)ethyl)propanamide (9g)**

Sample Name: SR-19-2d

=====

|                                                                       |                                                                                  |            |             |
|-----------------------------------------------------------------------|----------------------------------------------------------------------------------|------------|-------------|
| Acq. Operator                                                         | : SYSTEM                                                                         | Seq. Line  | : 5         |
| Acq. Instrument                                                       | : 1220 HPLC                                                                      | Location   | : 63        |
| Injection Date                                                        | : 1/6/2021 8:59:17 PM                                                            | Inj        | : 1         |
|                                                                       |                                                                                  | Inj Volume | : 50.000 µl |
| Different Inj Volume from Sample Entry! Actual Inj Volume : 30.000 µl |                                                                                  |            |             |
| Method                                                                | : C:\Chem32\1\Data\Audifas 2021-01-06 19-03-34\Wash_Shafikur.M (Sequence Method) |            |             |
| Last changed                                                          | : 1/6/2021 7:13:21 PM by SYSTEM                                                  |            |             |
| Method Info                                                           | : Methanol/Water TFA 0.05 %                                                      |            |             |

Sample Info : SR-19-2d

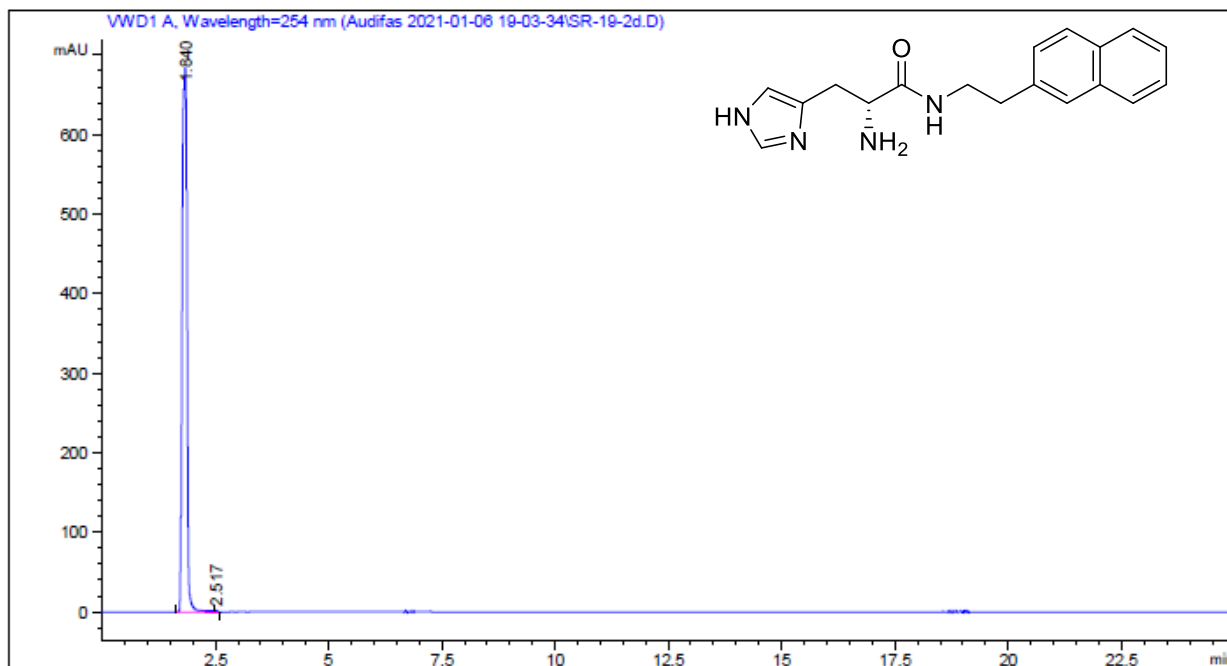

=====  
Area Percent Report  
=====

Sorted By : Signal  
Multiplier : 1.0000  
Dilution : 1.0000  
Use Multiplier & Dilution Factor with ISTDs

Signal 1: WWD1 A, Wavelength=254 nm

| Peak # | RetTime [min] | Type | Width [min] | Area [mAU*s] | Height [mAU] | Area %  |
|--------|---------------|------|-------------|--------------|--------------|---------|
| 1      | 1.840         | BV R | 0.1194      | 5018.99854   | 685.26447    | 99.8394 |
| 2      | 2.517         | VB E | 0.0575      | 8.07406      | 1.92153      | 0.1606  |

Totals : 5027.07260 687.18600

(S)-2-amino-3-(1H-imidazol-4-yl)-N-(naphthalen-2-ylmethyl)propanamide (10a)

Sample Name: SR-46-1d

=====

|                 |                       |            |             |
|-----------------|-----------------------|------------|-------------|
| Acq. Operator   | : SYSTEM              | Seq. Line  | : 4         |
| Acq. Instrument | : 1220 HPLC           | Location   | : 62        |
| Injection Date  | : 1/6/2021 8:31:47 PM | Inj        | : 1         |
|                 |                       | Inj Volume | : 50.000 µl |

Different Inj Volume from Sample Entry! Actual Inj Volume : 30.000 µl

Method : C:\Chem32\1\Data\Audifas 2021-01-06 19-03-34\Wash\_Shafikur.M (Sequence Method)

Last changed : 1/6/2021 7:13:21 PM by SYSTEM

Method Info : Methanol/Water TFA 0.05 %

Sample Info : SR-46-1d

Additional Info : Peak(s) manually integrated

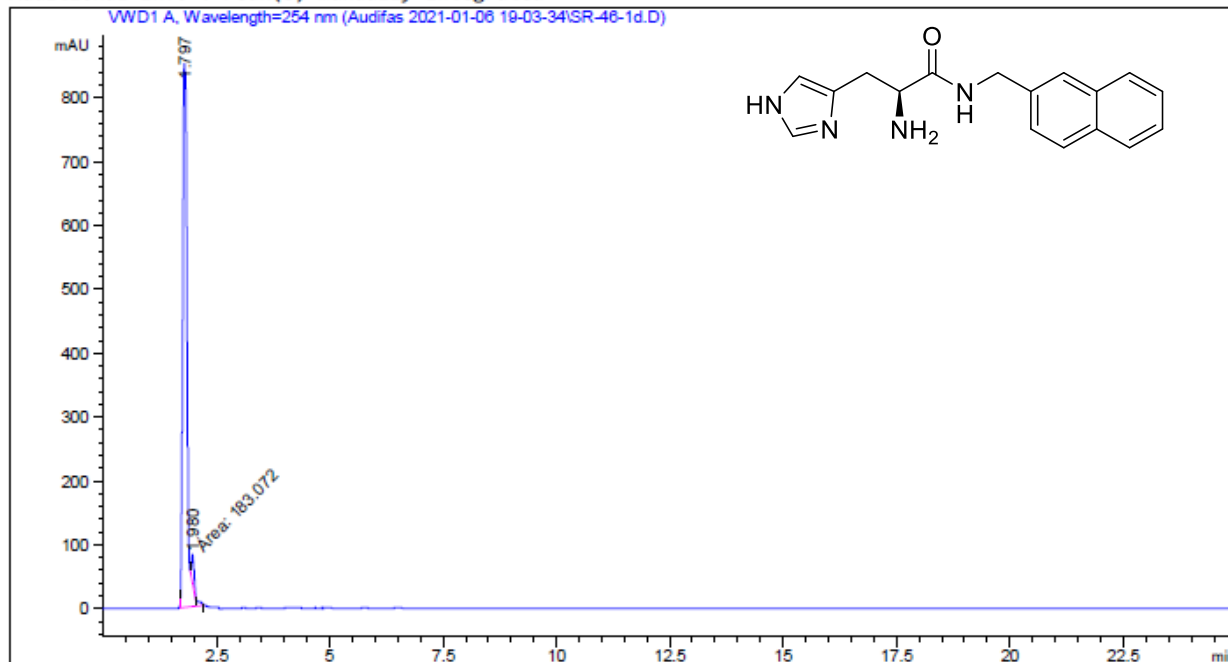

=====  
Area Percent Report  
=====

Sorted By : Signal  
Multiplier : 1.0000  
Dilution : 1.0000  
Use Multiplier & Dilution Factor with ISTDs

Signal 1: VWD1 A, Wavelength=254 nm

| Peak # | RetTime [min] | Type | Width [min] | Area [mAU*s] | Height [mAU] | Area %  |
|--------|---------------|------|-------------|--------------|--------------|---------|
| 1      | 1.797         | MM R | 0.1145      | 6074.97803   | 852.00824    | 97.0746 |
| 2      | 1.980         | MM T | 0.0675      | 183.07237    | 45.17344     | 2.9254  |

Totals : 6258.05040 897.18168

**(R)-2-amino-3-(1H-imidazol-4-yl)-N-(naphthalen-2-ylmethyl)propanamide (10b)**

Sample Name: SR-45-1d

=====

|                 |                       |            |             |
|-----------------|-----------------------|------------|-------------|
| Acq. Operator   | : SYSTEM              | Seq. Line  | : 3         |
| Acq. Instrument | : 1220 HPLC           | Location   | : 61        |
| Injection Date  | : 1/6/2021 8:04:18 PM | Inj        | : 1         |
|                 |                       | Inj Volume | : 50.000 µl |

Different Inj Volume from Sample Entry! Actual Inj Volume : 30.000 µl

Method : C:\Chem32\1\Data\Audifas 2021-01-06 19-03-34\Wash\_Shafikur.M (Sequence Method)

Last changed : 1/6/2021 7:13:21 PM by SYSTEM

Method Info : Methanol/Water TFA 0.05 %

Sample Info : SR-45-1d

Additional Info : Peak(s) manually integrated

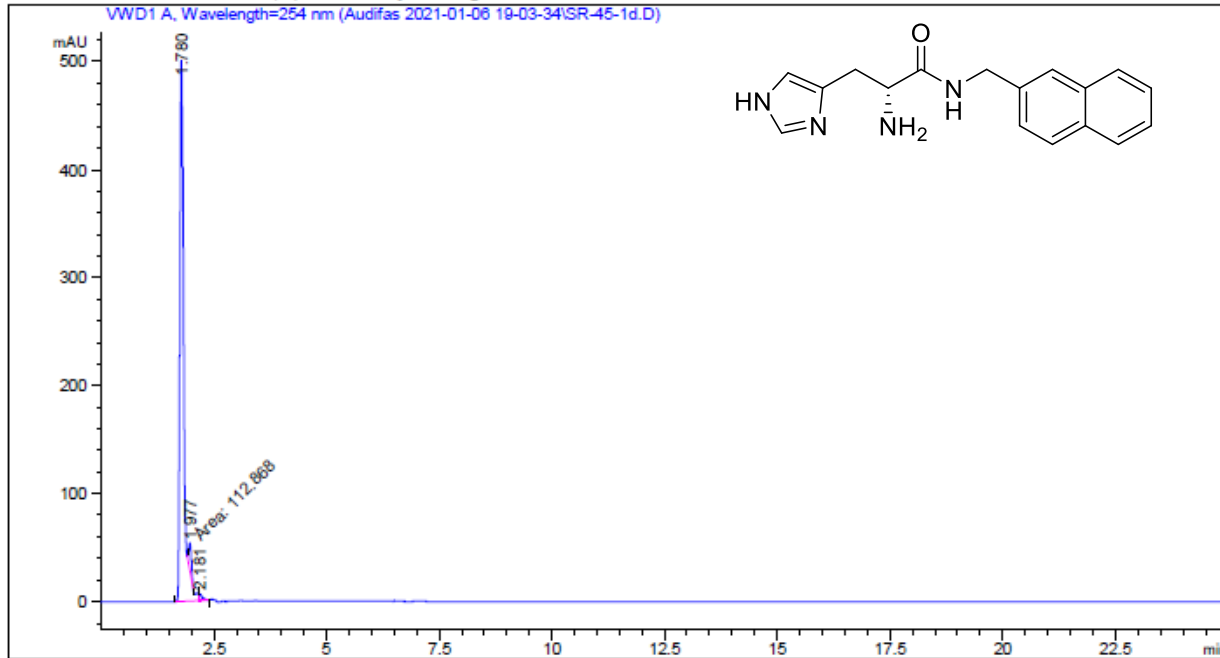

=====  
Area Percent Report  
=====

Sorted By : Signal  
Multiplier : 1.0000  
Dilution : 1.0000  
Use Multiplier & Dilution Factor with ISTDs

Signal 1: WVD1 A, Wavelength=254 nm

| Peak # | RetTime [min] | Type | Width [min] | Area [mAU*s] | Height [mAU] | Area %  |
|--------|---------------|------|-------------|--------------|--------------|---------|
| 1      | 1.780         | BV R | 0.0867      | 3096.73462   | 500.99149    | 95.4401 |
| 2      | 1.977         | MM T | 0.0721      | 112.86839    | 26.09600     | 3.4786  |
| 3      | 2.181         | VB E | 0.0706      | 35.08551     | 6.10260      | 1.0813  |



(S)-2-amino-3-(1H-imidazol-4-yl)-N-(naphthalen-1-ylmethyl)propanamide (10c)

Sample Name: SR-9-2d

=====

|                                         |                                                                                  |                   |             |
|-----------------------------------------|----------------------------------------------------------------------------------|-------------------|-------------|
| Acq. Operator                           | : SYSTEM                                                                         | Seq. Line         | : 7         |
| Acq. Instrument                         | : 1220 HPLC                                                                      | Location          | : 65        |
| Injection Date                          | : 1/6/2021 9:54:18 PM                                                            | Inj               | : 1         |
|                                         |                                                                                  | Inj Volume        | : 50.000 µl |
|                                         |                                                                                  | Actual Inj Volume | : 30.000 µl |
| Different Inj Volume from Sample Entry! |                                                                                  |                   |             |
| Method                                  | : C:\Chem32\1\Data\Audifas 2021-01-06 19-03-34\Wash_Shafikur.M (Sequence Method) |                   |             |
| Last changed                            | : 1/6/2021 7:13:21 PM by SYSTEM                                                  |                   |             |
| Method Info                             | : Methanol/Water TFA 0.05 %                                                      |                   |             |
| Sample Info                             | : SR-9-2d                                                                        |                   |             |

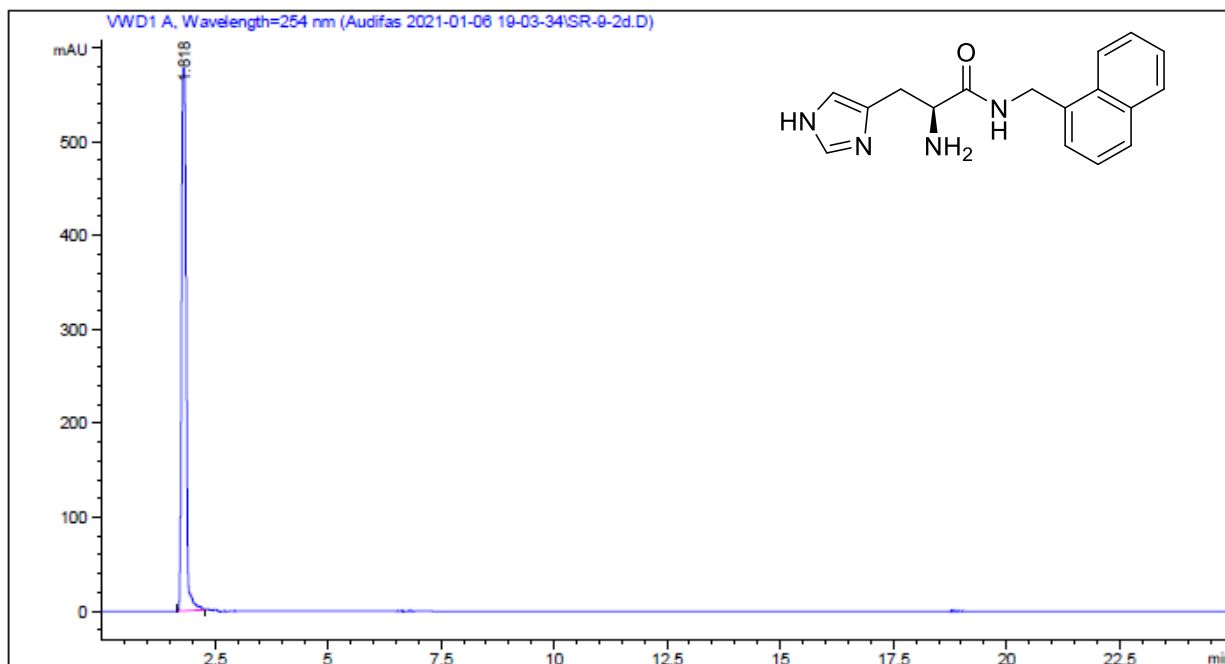

=====  
Area Percent Report  
=====

Sorted By : Signal  
Multiplier : 1.0000  
Dilution : 1.0000  
Use Multiplier & Dilution Factor with ISTDs

Signal 1: VWD1 A, Wavelength=254 nm

| Peak # | RetTime [min] | Type | Width [min] | Area [mAU*s] | Height [mAU] | Area %   |
|--------|---------------|------|-------------|--------------|--------------|----------|
| 1      | 1.818         | BV R | 0.1146      | 4119.67236   | 578.71716    | 100.0000 |

Totals : 4119.67236 578.71716

(R)-2-amino-3-(1H-imidazol-4-yl)-N-(naphthalen-1-ylmethyl)propanamide (10d)

Sample Name: SR-10-2d

=====

|                 |                        |            |             |
|-----------------|------------------------|------------|-------------|
| Acq. Operator   | : SYSTEM               | Seq. Line  | : 10        |
| Acq. Instrument | : 1220 HPLC            | Location   | : 66        |
| Injection Date  | : 1/6/2021 11:17:05 PM | Inj        | : 1         |
|                 |                        | Inj Volume | : 50.000 µl |

Different Inj Volume from Sample Entry! Actual Inj Volume : 30.000 µl

Method : C:\Chem32\1\Data\Audifas 2021-01-06 19-03-34\Wash\_Shafikur.M (Sequence Method)

Last changed : 1/6/2021 7:13:21 PM by SYSTEM

Method Info : Methanol/Water ammonia 0.05%

Sample Info : SR-10-2d

Additional Info : Peak(s) manually integrated

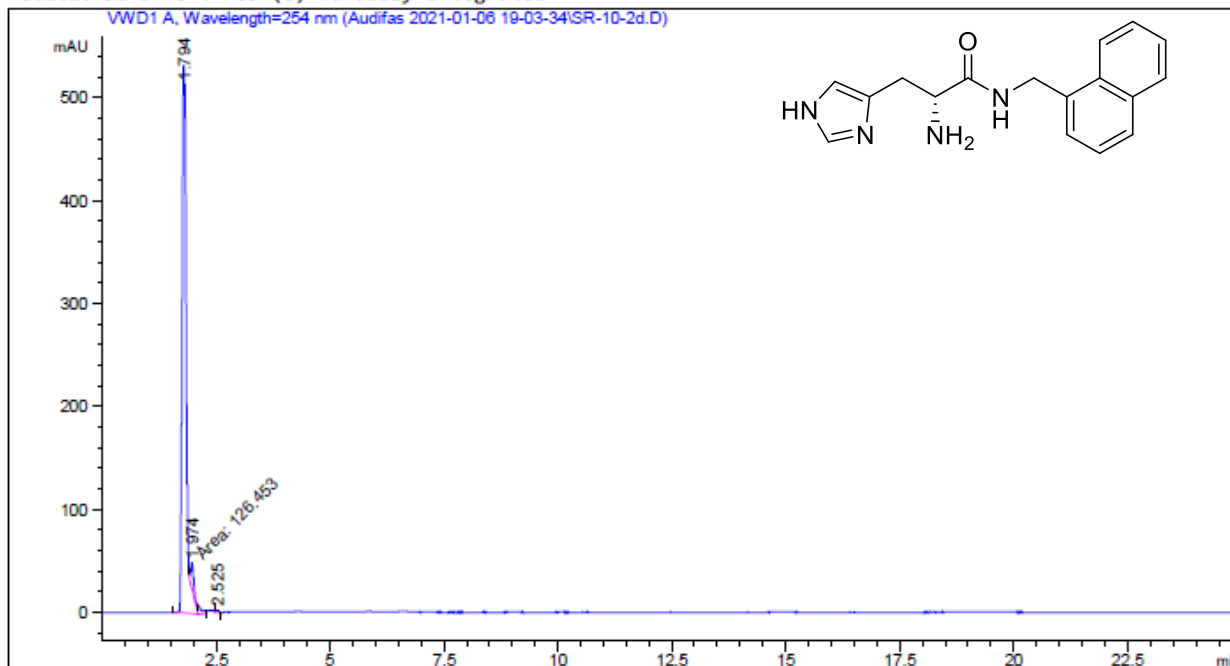

=====  
Area Percent Report  
=====

Sorted By : Signal  
Multiplier : 1.0000  
Dilution : 1.0000  
Use Multiplier & Dilution Factor with ISTDs

Signal 1: WVD1 A, Wavelength=254 nm

| Peak # | RetTime [min] | Type | Width [min] | Area [mAU*s] | Height [mAU] | Area %  |
|--------|---------------|------|-------------|--------------|--------------|---------|
| 1      | 1.794         | MM R | 0.1115      | 3561.12109   | 532.48346    | 96.2611 |
| 2      | 1.974         | MM T | 0.0849      | 126.45335    | 25.51042     | 3.4182  |
| 3      | 2.525         | VB   | 0.0615      | 11.86573     | 2.30843      | 0.3207  |

(S)-2-amino-3-(1H-imidazol-4-yl)-N-(quinolin-8-yl)propanamide (11a)

Acq. Operator : SYSTEM=====  
Acq. Instrument : HPLC Location : Vial 2  
Injection Date : 2/22/2021 12:28:32 PM Inj : 1  
Inj Volume : 20.000 µl  
Sequence File : C:\Chem32\1\DATA\AO\KK 2021-02-22 12-27-23\KK.S  
Method : C:\CHEM32\1\DATA\AO\KK 2021-02-22 12-27-23\CQ.M (Sequence Method)  
Last changed : 2/22/2021 12:27:23 PM by SYSTEM

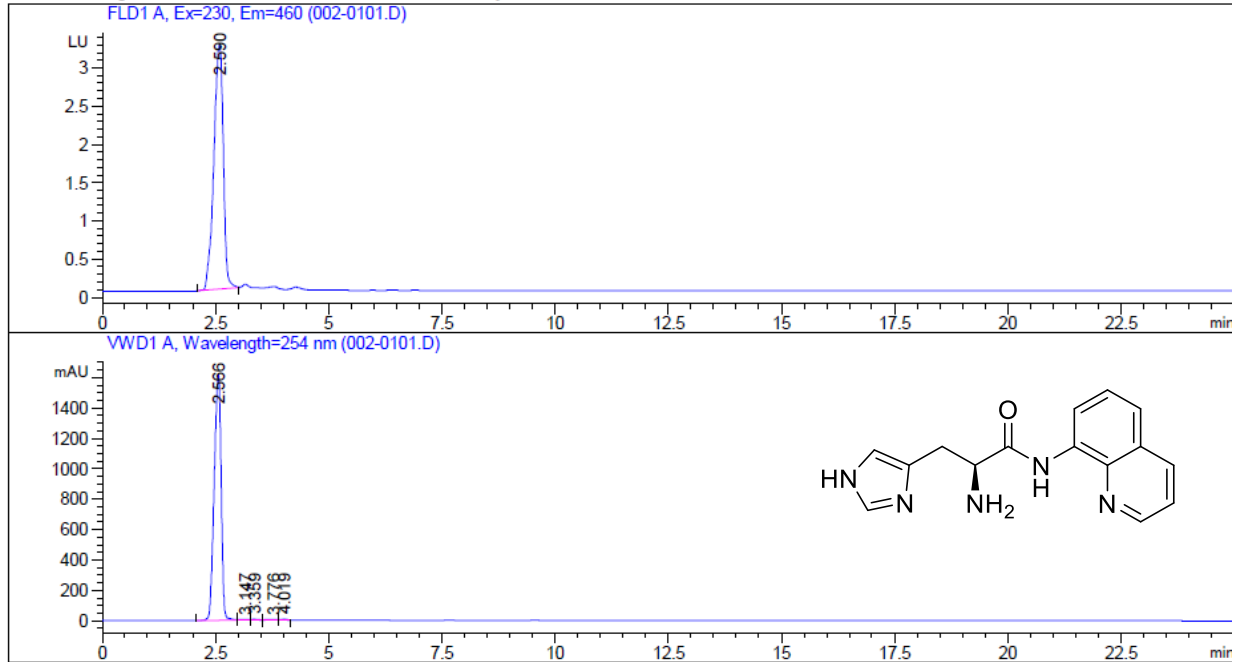

=====  
Area Percent Report  
=====

Sorted By : Signal  
Multiplier : 1.0000  
Dilution : 1.0000  
Do not use Multiplier & Dilution Factor with ISTDs

Signal 2: VWD1 A, Wavelength=254 nm

| Peak # | RetTime [min] | Type | Width [min] | Area [mAU*s] | Height [mAU] | Area %  |
|--------|---------------|------|-------------|--------------|--------------|---------|
| 1      | 2.566         | BV   | 0.1634      | 1.72670e4    | 1618.76880   | 99.0040 |
| 2      | 3.147         | VV   | 0.1739      | 57.22061     | 4.48363      | 0.3281  |
| 3      | 3.359         | VB   | 0.1301      | 38.78291     | 4.30338      | 0.2224  |
| 4      | 3.776         | BV   | 0.2168      | 30.98909     | 2.18032      | 0.1777  |
| 5      | 4.019         | VV   | 0.1189      | 46.72070     | 5.86617      | 0.2679  |

Totals : 1.74407e4 1635.60230

**(R)-2-amino-3-(1H-imidazol-4-yl)-N-(quinolin-8-yl)propanamide (11b)**

Sample Name: SR-24-1d

=====

|                                                                       |                                                                                  |            |             |
|-----------------------------------------------------------------------|----------------------------------------------------------------------------------|------------|-------------|
| Acq. Operator                                                         | : SYSTEM                                                                         | Seq. Line  | : 17        |
| Acq. Instrument                                                       | : 1220 HPLC                                                                      | Location   | : 55        |
| Injection Date                                                        | : 12/29/2020 9:52:27 PM                                                          | Inj        | : 1         |
|                                                                       |                                                                                  | Inj Volume | : 50.000 µl |
| Different Inj Volume from Sample Entry! Actual Inj Volume : 25.000 µl |                                                                                  |            |             |
| Method                                                                | : C:\Chem32\1\Data\Audifas 2020-12-29 14-08-47\Wash_Shafikur.M (Sequence Method) |            |             |
| Last changed                                                          | : 12/29/2020 2:08:51 PM by SYSTEM                                                |            |             |
| Method Info                                                           | : Wash_Shafikur Water 0.05 %TFA / Methanol                                       |            |             |

Sample Info : SR-24-1d

Additional Info : Peak(s) manually integrated

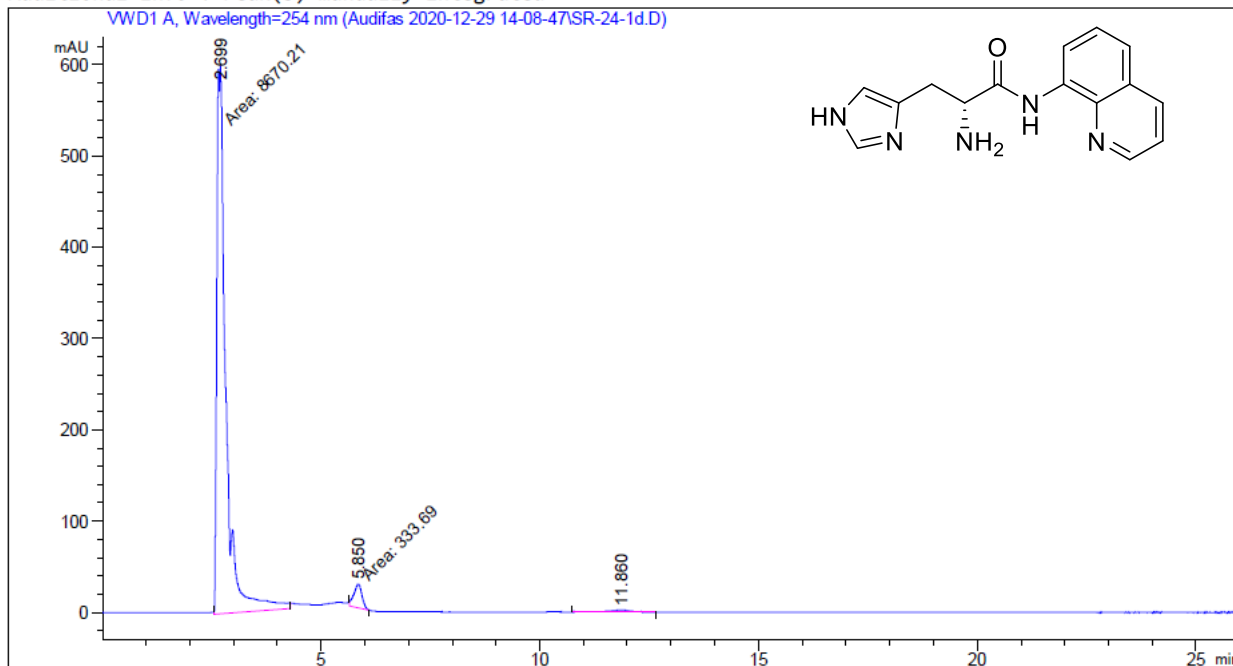

=====  
Area Percent Report  
=====

Sorted By : Signal  
Multiplier : 1.0000  
Dilution : 1.0000  
Use Multiplier & Dilution Factor with ISTDs

Signal 1: VWD1 A, Wavelength=254 nm

| Peak # | RetTime [min] | Type | Width [min] | Area [mAU*s] | Height [mAU] | Area %  |
|--------|---------------|------|-------------|--------------|--------------|---------|
| 1      | 2.699         | MM T | 0.2403      | 8670.20898   | 601.43866    | 95.4375 |
| 2      | 5.850         | MM T | 0.2157      | 333.68973    | 25.78662     | 3.6731  |
| 3      | 11.860        | VB R | 0.4245      | 80.79691     | 2.22593      | 0.8894  |
